# Supplementary material
Source: PubMed Central journal article supplement (PMC11036312)
Supplement: jama-e244175-s001.pdf [file jama-e244175-s001.pdf]

## Supplemental Online Content

Wallach JD, Yoon S, Doernberg H, et al. Associations Between Surrogate Markers and Clinical Outcomes for Nononcologic Chronic Disease Treatments. *JAMA*. Published online April 22, 2024. doi:10.1001/jama.2024.4175

**eMethods.** Meta-Analyses of Clinical Trials

**eTable 1.** Original Search Results

**eTable 1A.** Surrogate Marker-Clinical Outcome Pairs From Meta-Analyses of Clinical Trials With Correlation Coefficients, Coefficients of Determination, or Results From Meta-Regression Analyses

**eTable 1B.** Surrogate Marker-Clinical Outcome Pairs From Meta-Analyses of Clinical Trials With Correlation Coefficients, Coefficients of Determination, or Results From Meta-Regression Analyses Classification for Figure 2

**eTable 2.** Alzheimer's Disease

**eTable 3.** Primary Glomerular Disease

**eTable 4.** Chronic Kidney Disease

**eTable 5.** Chronic Obstructive Pulmonary Disease

**eTable 6.** Gout

**eTable 7.** HIV

**eTable 8.** Hypercholesterolemia

**eTable 9.** Hyperphosphatemia

**eTable 10.** Hypertension

**eTable 11.** Hypertriglyceridemia

**eTable 12.** Osteoporosis

**eTable 13.** Pulmonary Fibrosis

**eTable 14.** Secondary Hyperparathyroidism

**eTable 15.** Type 2 Diabetes

**eFigure 1.** Asthma

**eFigure 2.** Cushing's Disease / Cushing's Syndrome

**eFigure 3.** Exocrine Pancreatic Insufficiency

**eFigure 4.** Hepatitis B

**eFigure 5.** Hepatitis C

**eFigure 6.** Hepatitis D

**eFigure 7.** Hypothyroidism

**eFigure 8.** Lupus Nephritis

**eFigure 9.** Mycobacterium Avium Complex (MAC) Lung Disease

**eFigure 10.** Non-alcoholic Steatohepatitis (NASH)

**eFigure 11.** Opioid Use Disorder

**eFigure 12.** Paget's Disease

**eFigure 13.** Primary Biliary Cholangitis

**eFigure 14.** Primary Hyperparathyroidism

**eFigure 15.** Pulmonary Tuberculosis

**eFigure 16.** Systemic Sclerosis-Interstitial Lung Disease

**eFigure 17.** Tobacco Dependence

**eFigure 18.** Alzheimer's Disease

**eFigure 19.** Primary Glomerular Diseases Associated With Significant Proteinuria

**eFigure 20.** Chronic Kidney Disease

**eFigure 21.** Chronic Obstructive Pulmonary Disease

**eFigure 22.** Gout

**eFigure 23.** Human Immunodeficiency Virus (HIV)

**eFigure 24.** Hypercholesterolemia

**eFigure 25.** Hyperphosphatemia

**eFigure 26.** Hypertension

**eFigure 27.** Hypertriglyceridemia

**eFigure 28.** Osteoporosis

**eFigure 29.** Pulmonary Fibrosis

**eFigure 30.** Secondary Hyperparathyroidism

**eFigure 31.** Type 2 Diabetes Mellitus

**eReferences.**

This supplementary material has been provided by the authors to give readers additional information about their work.

## eMethods

### Surrogate marker – indications excluded

The US Food and Drug Administration's (FDA's) Adult Surrogate Endpoint Table provides a list of surrogate markers that can form basis of drug approval or licensure across different diseases. On August 2, 2022, we accessed FDA's downloaded table and identified 197 surrogate markers used as primary endpoints for clinical trials. We did not consider FDA's Pediatric Surrogate Endpoint Table and excluded any surrogate markers for diseases listed in FDA's Adult Surrogate Endpoint Table that were acute illnesses (e.g., skin infection), primarily genetic (e.g., Fabry disease, cystic fibrosis), or vaccine-related. We also excluded surrogates for oncologic diseases, as those have been the focus of previous reviews.<sup>1-4</sup> For each surrogate marker, we then recorded the disease or use, patient population, and type of approval (traditional vs. accelerated approval).

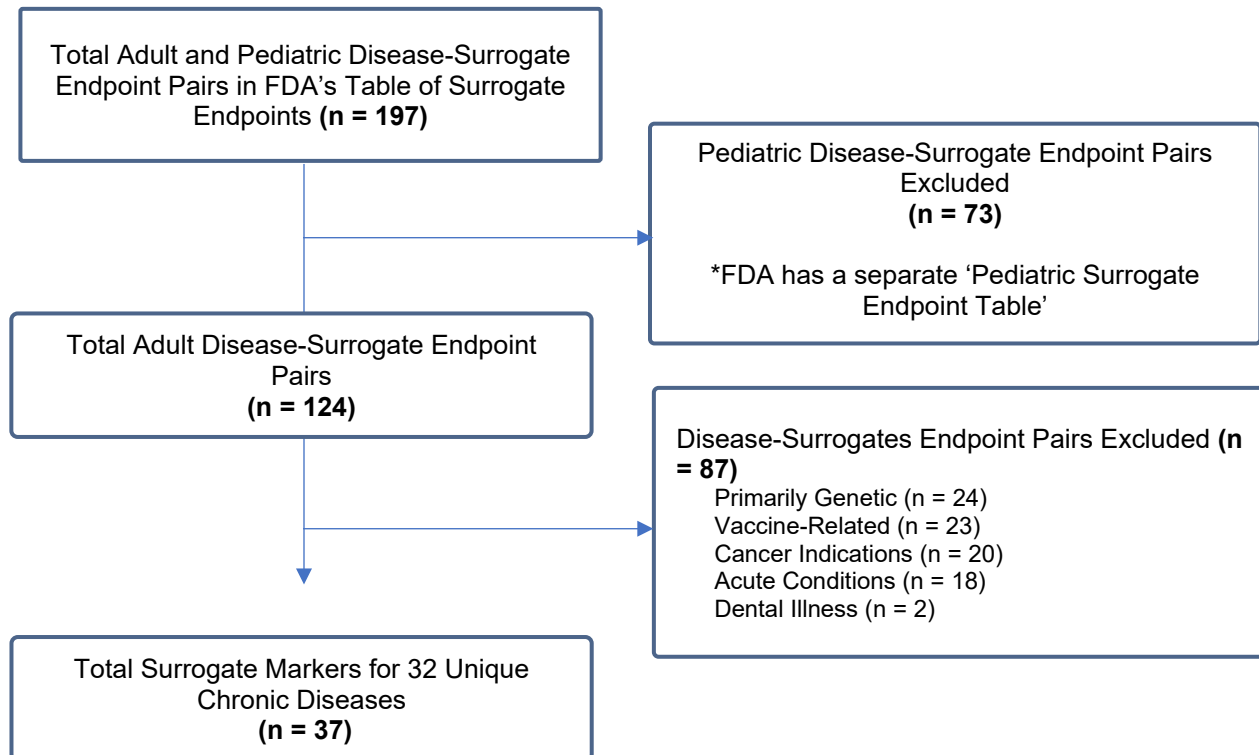

## **Trial-level meta-analyses**

The FDA has not established standards for validating surrogate markers as primary endpoints or clarified the criteria for the use of surrogate markers for chronic diseases.<sup>5</sup> Although different methods have been proposed for the validation of surrogate markers,<sup>6,7</sup> evidence suggests that FDA has often relied on a multiple trial approach to validate surrogate markers. In this two-stage approach, it is first necessary to demonstrate that individual changes in a surrogate marker caused by the treatment are correlated with individual changes in the clinical outcome. Next, meta-analyses of multiple randomized controlled trials (i.e., trial-level surrogacy) are needed to confirm that treatment effects with respect to the surrogate marker are correlated with treatment effects with respect to the clinical outcome.<sup>8</sup> As in previous evaluations of surrogate markers in oncology, we focus on identifying evidence from trial-level meta-analyses.<sup>1-4</sup>

## **Search strategy**

We developed and performed 31 broad searches of the Medline (Ovid ALL, 1946) database (**eTable 1**). Each search included three main concepts: study design (specific search terms to identify meta-analyses, systematic reviews, and pooled analyses); surrogate marker (specific search terms for each surrogate marker in FDA's Table), correlation (specific search terms for the conception of correlation or association), and disease (specific search terms for the relevant diseases listed for each surrogate marker in FDA's Table). When the same surrogate markers were listed for multiple diseases in FDA's Table (e.g., urine free cortisol for Cushing's syndrome and Cushing's disease) or multiple surrogate markers were listed for one disease (undetectable plasma HIV RNA, serum HIV antibody, and greater than 0.5 log reduction in plasma HIV RNA for HIV-1), we conduct one search. The study design search strategy contained elements from a published search filter, which has been used in previous umbrella reviews conducted by our team.<sup>9</sup> The search strategies for surrogate markers and correlation were modified based on previously developed search strings.<sup>1,4</sup>

Although our initial set of Ovid searches were performed and downloaded November 28, 2022, we expanded our searches on March 19, 2023, to capture a broader sample of potentially eligible trial-level meta-analyses. In particular, after starting the first round of title and abstract screening, we decided to remove the search strategy focused on capturing the broad concept of surrogate markers, as we realized that these terms may not be consistently reported in titles

and/or abstracts of trial-level meta-analyses. To supplement our original search, we added surrogate-specific terms to each search based on the language used to describe each surrogate marker in FDA's Table.

## **Eligibility criteria**

We identified all unique associations between treatment effects measured using the surrogate marker and any clinical outcome (i.e., surrogate marker-clinical outcome pairs). Earlier versions of updated meta-analyses were excluded unless they reported unique surrogate marker-clinical outcome pairs (e.g., an earlier meta-analysis reported associations based on surrogate markers or clinical outcomes with slightly different definitions). Discrepancies were resolved by discussion and consensus (JDW, SY, HD, RR, JSR).

For hemoglobin A1c (HbA1c) as a surrogate marker used in clinical trials for type 2 diabetes mellitus treatment, we excluded trial-level meta-analyses that only included trials comparing more versus less intensive control (these were classified as 'wrong aim'). However, if meta-analyses incorporated these trials along with trials comparing at least two treatment groups in their analyses, they were considered eligible.

## **Data Extraction**

For each eligible meta-analysis, three reviewers (JDW, SY, HG) recorded study characteristics: the first author; publication year; journal name; funding source; study design (i.e., meta-analysis, systematic review and meta-analysis, pooled analysis); number and total sample size of the component studies; chronic diseases; interventions; and definitions of the evaluated surrogate markers and clinical outcomes.

## **Results**

Eligible studies:

- Alzheimer's disease<sup>10-12</sup>
- Primary glomerular disease<sup>13</sup>

- Chronic kidney disease<sup>14,15</sup>
- Chronic obstructive pulmonary disease<sup>16-21</sup>
- Gout<sup>22,23</sup>
- HIV<sup>24,25</sup>
- Hypercholesterolemia<sup>26-36</sup>
- Hyperphosphatemia<sup>37</sup>
- Hypertension<sup>38-47</sup>
- Hypertriglyceridemia<sup>32,33,35</sup>
- Osteoporosis<sup>48-53</sup>
- Pulmonary fibrosis<sup>54</sup>
- Secondary hyperparathyroidism<sup>37</sup>
- Type 2 diabetes mellitus<sup>55-63</sup>

### **Discussion (additional text)**

Surrogate markers used as primary end points in clinical trials supporting approval of oncologic medical products are often weakly associated with clinical outcomes.<sup>1-4</sup> For example, a previous study assessed the underlying evidence for the surrogate end points for solid tumors listed in FDA's Table and found that none were strongly correlated with overall survival in systematic reviews, meta-analyses, and correlation studies.<sup>1</sup> This study builds upon those findings focused on oncology treatment, demonstrating similarly weak or inconsistent associations in published meta-analyses for many surrogate markers listed by FDA as eligible for use in clinical trials supporting traditional approval of non-oncologic chronic disease treatments, including blood pressure for hypertension and bone mineral density for osteoporosis.

### **Searches**

**eTable 1. Original search results**

| Ovid MEDLINE(R)<br>ALL <1946 to<br>November 28,<br>2022> | Alzheimer's Disease                                                     |         |
|----------------------------------------------------------|-------------------------------------------------------------------------|---------|
| 1                                                        | [review focused search]                                                 | 0       |
| 2                                                        | [concept: SRs]                                                          | 0       |
| 3                                                        | (systematic adj4 review).ti.                                            | 206595  |
| 4                                                        | systematic review.pt.                                                   | 220930  |
| 5                                                        | Cochrane Database of Systematic Reviews.jn. and review.pt.              | 14201   |
| 6                                                        | [approach c: based on Lee 2012]                                         | 0       |
| 7                                                        | medline.tw. or systematic review.ti. or meta-analysis.pt. or pubmed.tw. | 433917  |
| 8                                                        | [from our previous searches]                                            | 0       |
| 9                                                        | (pooled analysis or pooled analyses).mp.                                | 13644   |
| 10                                                       | (metaanalysis or meta-analysis).af.                                     | 261113  |
| 11                                                       | 3 OR 4 OR 5 OR 7 OR 9 OR 10                                             | 506157  |
| 12                                                       | (correlat* OR associat* OR regress* OR validat*).mp.                    | 8724508 |
| 13                                                       | [surrogate search term]                                                 |         |
| 14                                                       | biomarker*.mp. or exp biomarkers/                                       | 1080881 |
| 15                                                       | surrogate*.mp.                                                          | 66611   |
| 16                                                       | intermediate*.mp.                                                       | 377243  |
| 17                                                       | 14 OR 15 OR 16                                                          | 1492820 |
| 18                                                       | [disease-specific search term]                                          | 0       |
| 19                                                       | Alzheimer*.mp.                                                          | 192206  |



|                                                                          |                                                                         |         |
|--------------------------------------------------------------------------|-------------------------------------------------------------------------|---------|
| 20                                                                       | 11 AND 12 AND 17 AND 19                                                 | 466     |
| <b>Ovid MEDLINE(R)<br/>ALL &lt;1946 to<br/>November 28,<br/>2022&gt;</b> | <b>Asthma</b>                                                           |         |
| 1                                                                        | [review focused search]                                                 | 0       |
| 2                                                                        | [concept: SRs]                                                          | 0       |
| 3                                                                        | (systematic adj4 review).ti.                                            | 206595  |
| 4                                                                        | systematic review.pt.                                                   | 220930  |
| 5                                                                        | Cochrane Database of Systematic Reviews.jn. and review.pt.              | 14201   |
| 6                                                                        | [approach c: based on Lee 2012]                                         | 0       |
| 7                                                                        | medline.tw. or systematic review.ti. or meta-analysis.pt. or pubmed.tw. | 433917  |
| 8                                                                        | [from our previous searches]                                            | 0       |
| 9                                                                        | (pooled analysis or pooled analyses).mp.                                | 13644   |
| 10                                                                       | (metaanalysis or meta-analysis).af.                                     | 261113  |
| 11                                                                       | 3 OR 4 OR 5 OR 7 OR 9 OR 10                                             | 506157  |
| 12                                                                       | (correlat* OR associat* OR regress* OR validat*).mp.                    | 8724508 |
| 13                                                                       | [surrogate search term]                                                 |         |
| 14                                                                       | biomarker*.mp. or exp biomarkers/                                       | 1080881 |
| 15                                                                       | surrogate*.mp.                                                          | 66611   |
| 16                                                                       | intermediate*.mp.                                                       | 377243  |
| 17                                                                       | 14 OR 15 OR 16                                                          | 1492820 |
| 18                                                                       | [disease-specific search term]                                          | 0       |

|    |                         |        |
|----|-------------------------|--------|
| 19 | asthma*.mp.             | 197912 |
| 20 | 11 AND 12 AND 17 AND 19 | 227    |

|                                                                          |                                                                         |         |
|--------------------------------------------------------------------------|-------------------------------------------------------------------------|---------|
| <b>Ovid MEDLINE(R)<br/>ALL &lt;1946 to<br/>November 28,<br/>2022&gt;</b> | <b>Chronic Kidney Disease</b>                                           |         |
| 1                                                                        | [review focused search]                                                 | 0       |
| 2                                                                        | [concept: SRs]                                                          | 0       |
| 3                                                                        | (systematic adj4 review).ti.                                            | 206595  |
| 4                                                                        | systematic review.pt.                                                   | 220930  |
| 5                                                                        | Cochrane Database of Systematic Reviews.jn. and review.pt.              | 14201   |
| 6                                                                        | [approach c: based on Lee 2012]                                         | 0       |
| 7                                                                        | medline.tw. or systematic review.ti. or meta-analysis.pt. or pubmed.tw. | 433917  |
| 8                                                                        | [from our previous searches]                                            | 0       |
| 9                                                                        | (pooled analysis or pooled analyses).mp.                                | 13644   |
| 10                                                                       | (metaanalysis or meta-analysis).af.                                     | 261113  |
| 11                                                                       | 3 OR 4 OR 5 OR 7 OR 9 OR 10                                             | 506157  |
| 12                                                                       | (correlat* OR associat* OR regress* OR validat*).mp.                    | 8724508 |
| 13                                                                       | [surrogate search term]                                                 |         |
| 14                                                                       | biomarker*.mp. or exp biomarkers/                                       | 1080881 |
| 15                                                                       | surrogate*.mp.                                                          | 66611   |
| 16                                                                       | intermediate*.mp.                                                       | 377243  |
| 17                                                                       | 14 OR 15 OR 16                                                          | 1492820 |

|    |                                    |       |
|----|------------------------------------|-------|
| 18 | [disease-specific search term]     | 0     |
| 19 | chronic kidney disease OR CKD).mp. | 75083 |
| 20 | 11 AND 12 AND 17 AND 19            | 220   |

|                                                                              |                                                                         |         |
|------------------------------------------------------------------------------|-------------------------------------------------------------------------|---------|
| <b>Ovid<br/>MEDLINE(R)<br/>ALL &lt;1946 to<br/>November 28,<br/>2022&gt;</b> | <b>Chronic Obstructive Pulmonary Disease (COPD)</b>                     |         |
| 1                                                                            | [review focused search]                                                 | 0       |
| 2                                                                            | [concept: SRs]                                                          | 0       |
| 3                                                                            | (systematic adj4 review).ti.                                            | 206595  |
| 4                                                                            | systematic review.pt.                                                   | 220930  |
| 5                                                                            | Cochrane Database of Systematic Reviews.jn. and review.pt.              | 14201   |
| 6                                                                            | [approach c: based on Lee 2012]                                         | 0       |
| 7                                                                            | medline.tw. or systematic review.ti. or meta-analysis.pt. or pubmed.tw. | 433917  |
| 8                                                                            | [from our previous searches]                                            | 0       |
| 9                                                                            | (pooled analysis or pooled analyses).mp.                                | 13644   |
| 10                                                                           | (metaanalysis or meta-analysis).af.                                     | 261113  |
| 11                                                                           | 3 OR 4 OR 5 OR 7 OR 9 OR 10                                             | 506157  |
| 12                                                                           | (correlat* OR associat* OR regress* OR validat*).mp.                    | 8724508 |
| 13                                                                           | [surrogate search term]                                                 |         |
| 14                                                                           | biomarker*.mp. or exp biomarkers/                                       | 1080881 |
| 15                                                                           | surrogate*.mp.                                                          | 66611   |
| 16                                                                           | intermediate*.mp.                                                       | 377243  |

|    |                                                     |         |
|----|-----------------------------------------------------|---------|
| 17 | 14 OR 15 OR 16                                      | 1492820 |
| 18 | [disease-specific search term]                      | 0       |
| 19 | (chronic obstructive pulmonary disease OR COPD).mp. | 76459   |
| 20 | 11 AND 12 AND 17 AND 19                             | 156     |

|                                                                              |                                                                         |         |
|------------------------------------------------------------------------------|-------------------------------------------------------------------------|---------|
| <b>Ovid<br/>MEDLINE(R)<br/>ALL &lt;1946 to<br/>November 28,<br/>2022&gt;</b> | <b>Cushing's disease/syndrome</b>                                       |         |
| 1                                                                            | [review focused search]                                                 | 0       |
| 2                                                                            | [concept: SRs]                                                          | 0       |
| 3                                                                            | (systematic adj4 review).ti.                                            | 206595  |
| 4                                                                            | systematic review.pt.                                                   | 220930  |
| 5                                                                            | Cochrane Database of Systematic Reviews.jn. and review.pt.              | 14201   |
| 6                                                                            | [approach c: based on Lee 2012]                                         | 0       |
| 7                                                                            | medline.tw. or systematic review.ti. or meta-analysis.pt. or pubmed.tw. | 433917  |
| 8                                                                            | [from our previous searches]                                            | 0       |
| 9                                                                            | (pooled analysis or pooled analyses).mp.                                | 13644   |
| 10                                                                           | (metaanalysis or meta-analysis).af.                                     | 261113  |
| 11                                                                           | 3 OR 4 OR 5 OR 7 OR 9 OR 10                                             | 506157  |
| 12                                                                           | (correlat* OR associat* OR regress* OR validat*).mp.                    | 8724508 |
| 13                                                                           | [surrogate search term]                                                 |         |
| 14                                                                           | biomarker*.mp. or exp biomarkers/                                       | 1080881 |
| 15                                                                           | surrogate*.mp.                                                          | 66611   |

|    |                                |         |
|----|--------------------------------|---------|
| 16 | intermediate*.mp.              | 377243  |
| 17 | 14 OR 15 OR 16                 | 1492820 |
| 18 | [disease-specific search term] | 0       |
| 19 | Cushing*.mp.                   | 19701   |
| 20 | 11 AND 12 AND 17 AND 19        | 13      |

|                                                                              |                                                                         |         |
|------------------------------------------------------------------------------|-------------------------------------------------------------------------|---------|
| <b>Ovid<br/>MEDLINE(R)<br/>ALL &lt;1946 to<br/>November 28,<br/>2022&gt;</b> | <b>Exocrine pancreatic insufficiency</b>                                |         |
| 1                                                                            | [review focused search]                                                 | 0       |
| 2                                                                            | [concept: SRs]                                                          | 0       |
| 3                                                                            | (systematic adj4 review).ti.                                            | 206595  |
| 4                                                                            | systematic review.pt.                                                   | 220930  |
| 5                                                                            | Cochrane Database of Systematic Reviews.jn. and review.pt.              | 14201   |
| 6                                                                            | [approach c: based on Lee 2012]                                         | 0       |
| 7                                                                            | medline.tw. or systematic review.ti. or meta-analysis.pt. or pubmed.tw. | 433917  |
| 8                                                                            | [from our previous searches]                                            | 0       |
| 9                                                                            | (pooled analysis or pooled analyses).mp.                                | 13644   |
| 10                                                                           | (metaanalysis or meta-analysis).af.                                     | 261113  |
| 11                                                                           | 3 OR 4 OR 5 OR 7 OR 9 OR 10                                             | 506157  |
| 12                                                                           | (correlat* OR associat* OR regress* OR validat*).mp.                    | 8724508 |
| 13                                                                           | [surrogate search term]                                                 |         |
| 14                                                                           | biomarker*.mp. or exp biomarkers/                                       | 1080881 |

|    |                                |         |
|----|--------------------------------|---------|
| 15 | surrogate*.mp.                 | 66611   |
| 16 | intermediate*.mp.              | 377243  |
| 17 | 14 OR 15 OR 16                 | 1492820 |
| 18 | [disease-specific search term] | 0       |
| 19 | pancreatic insufficiency.mp.   | 4417    |
| 20 | 11 AND 12 AND 17 AND 19        | 1       |

|                                                                              |                                                                         |         |
|------------------------------------------------------------------------------|-------------------------------------------------------------------------|---------|
| <b>Ovid<br/>MEDLINE(R)<br/>ALL &lt;1946 to<br/>November 28,<br/>2022&gt;</b> | <b>Gout</b>                                                             |         |
| 1                                                                            | [review focused search]                                                 | 0       |
| 2                                                                            | [concept: SRs]                                                          | 0       |
| 3                                                                            | (systematic adj4 review).ti.                                            | 206595  |
| 4                                                                            | systematic review.pt.                                                   | 220930  |
| 5                                                                            | Cochrane Database of Systematic Reviews.jn. and review.pt.              | 14201   |
| 6                                                                            | [approach c: based on Lee 2012]                                         | 0       |
| 7                                                                            | medline.tw. or systematic review.ti. or meta-analysis.pt. or pubmed.tw. | 433917  |
| 8                                                                            | [from our previous searches]                                            | 0       |
| 9                                                                            | (pooled analysis or pooled analyses).mp.                                | 13644   |
| 10                                                                           | (metaanalysis or meta-analysis).af.                                     | 261113  |
| 11                                                                           | 3 OR 4 OR 5 OR 7 OR 9 OR 10                                             | 506157  |
| 12                                                                           | (correlat* OR associat* OR regress* OR validat*).mp.                    | 8724508 |
| 13                                                                           | [surrogate search term]                                                 |         |

|    |                                   |         |
|----|-----------------------------------|---------|
| 14 | biomarker*.mp. or exp biomarkers/ | 1080881 |
| 15 | surrogate*.mp.                    | 66611   |
| 16 | intermediate*.mp.                 | 377243  |
| 17 | 14 OR 15 OR 16                    | 1492820 |
| 18 | [disease-specific search term]    | 0       |
| 19 | gout*.mp.                         | 21777   |
| 20 | 11 AND 12 AND 17 AND 19           | 28      |

|                                                                              |                                                                         |         |
|------------------------------------------------------------------------------|-------------------------------------------------------------------------|---------|
| <b>Ovid<br/>MEDLINE(R)<br/>ALL &lt;1946 to<br/>November 28,<br/>2022&gt;</b> | <b>Hepatitis B virus (HBV)</b>                                          |         |
| 1                                                                            | [review focused search]                                                 | 0       |
| 2                                                                            | [concept: SRs]                                                          | 0       |
| 3                                                                            | (systematic adj4 review).ti.                                            | 206595  |
| 4                                                                            | systematic review.pt.                                                   | 220930  |
| 5                                                                            | Cochrane Database of Systematic Reviews.jn. and review.pt.              | 14201   |
| 6                                                                            | [approach c: based on Lee 2012]                                         | 0       |
| 7                                                                            | medline.tw. or systematic review.ti. or meta-analysis.pt. or pubmed.tw. | 433917  |
| 8                                                                            | [from our previous searches]                                            | 0       |
| 9                                                                            | (pooled analysis or pooled analyses).mp.                                | 13644   |
| 10                                                                           | (metaanalysis or meta-analysis).af.                                     | 261113  |
| 11                                                                           | 3 OR 4 OR 5 OR 7 OR 9 OR 10                                             | 506157  |
| 12                                                                           | (correlat* OR associat* OR regress* OR validat*).mp.                    | 8724508 |

|    |                                   |         |
|----|-----------------------------------|---------|
| 13 | [surrogate search term]           |         |
| 14 | biomarker*.mp. or exp biomarkers/ | 1080881 |
| 15 | surrogate*.mp.                    | 66611   |
| 16 | intermediate*.mp.                 | 377243  |
| 17 | 14 OR 15 OR 16                    | 1492820 |
| 18 | [disease-specific search term]    | 0       |
| 19 | (hepatitis B OR HBV).mp.          | 112562  |
| 20 | 11 AND 12 AND 17 AND 19           | 134     |

|                                                                              |                                                                         |        |
|------------------------------------------------------------------------------|-------------------------------------------------------------------------|--------|
| <b>Ovid<br/>MEDLINE(R)<br/>ALL &lt;1946 to<br/>November 28,<br/>2022&gt;</b> | <b>Hepatitis C virus (HCV)</b>                                          |        |
| 1                                                                            | [review focused search]                                                 | 0      |
| 2                                                                            | [concept: SRs]                                                          | 0      |
| 3                                                                            | (systematic adj4 review).ti.                                            | 206595 |
| 4                                                                            | systematic review.pt.                                                   | 220930 |
| 5                                                                            | Cochrane Database of Systematic Reviews.jn. and review.pt.              | 14201  |
| 6                                                                            | [approach c: based on Lee 2012]                                         | 0      |
| 7                                                                            | medline.tw. or systematic review.ti. or meta-analysis.pt. or pubmed.tw. | 433917 |
| 8                                                                            | [from our previous searches]                                            | 0      |
| 9                                                                            | (pooled analysis or pooled analyses).mp.                                | 13644  |
| 10                                                                           | (metaanalysis or meta-analysis).af.                                     | 261113 |
| 11                                                                           | 3 OR 4 OR 5 OR 7 OR 9 OR 10                                             | 506157 |



|    |                                                      |         |
|----|------------------------------------------------------|---------|
| 12 | (correlat* OR associat* OR regress* OR validat*).mp. | 8724508 |
| 13 | [surrogate search term]                              |         |
| 14 | biomarker*.mp. or exp biomarkers/                    | 1080881 |
| 15 | surrogate*.mp.                                       | 66611   |
| 16 | intermediate*.mp.                                    | 377243  |
| 17 | 14 OR 15 OR 16                                       | 1492820 |
| 18 | [disease-specific search term]                       | 0       |
| 19 | (hepatitis C OR HCV).mp.                             | 105098  |
| 20 | 11 AND 12 AND 17 AND 19                              | 115     |

|                                                                              |                                                                         |        |
|------------------------------------------------------------------------------|-------------------------------------------------------------------------|--------|
| <b>Ovid<br/>MEDLINE(R)<br/>ALL &lt;1946<br/>to November<br/>28, 2022&gt;</b> | <b>Hepatitis D virus (HDV)</b>                                          |        |
| 1                                                                            | [review focused search]                                                 | 0      |
| 2                                                                            | [concept: SRs]                                                          | 0      |
| 3                                                                            | (systematic adj4 review).ti.                                            | 206595 |
| 4                                                                            | systematic review.pt.                                                   | 220930 |
| 5                                                                            | Cochrane Database of Systematic Reviews.jn. and review.pt.              | 14201  |
| 6                                                                            | [approach c: based on Lee 2012]                                         | 0      |
| 7                                                                            | medline.tw. or systematic review.ti. or meta-analysis.pt. or pubmed.tw. | 433917 |
| 8                                                                            | [from our previous searches]                                            | 0      |
| 9                                                                            | (pooled analysis or pooled analyses).mp.                                | 13644  |
| 10                                                                           | (metaanalysis or meta-analysis).af.                                     | 261113 |

|    |                                                      |         |
|----|------------------------------------------------------|---------|
| 11 | 3 OR 4 OR 5 OR 7 OR 9 OR 10                          | 506157  |
| 12 | (correlat* OR associat* OR regress* OR validat*).mp. | 8724508 |
| 13 | [surrogate search term]                              |         |
| 14 | biomarker*.mp. or exp biomarkers/                    | 1080881 |
| 15 | surrogate*.mp.                                       | 66611   |
| 16 | intermediate*.mp.                                    | 377243  |
| 17 | 14 OR 15 OR 16                                       | 1492820 |
| 18 | [disease-specific search term]                       | 0       |
| 19 | (hepatitis D OR HDV).mp.                             | 4281    |
| 20 | 11 AND 12 AND 17 AND 19                              | 1       |

|                                                                              |                                                                         |        |
|------------------------------------------------------------------------------|-------------------------------------------------------------------------|--------|
| <b>Ovid<br/>MEDLINE(R)<br/>ALL &lt;1946<br/>to November<br/>28, 2022&gt;</b> | <b>Human Immunodeficiency Virus-1 (HIV-1)</b>                           |        |
| 1                                                                            | [review focused search]                                                 | 0      |
| 2                                                                            | [concept: SRs]                                                          | 0      |
| 3                                                                            | (systematic adj4 review).ti.                                            | 206595 |
| 4                                                                            | systematic review.pt.                                                   | 220930 |
| 5                                                                            | Cochrane Database of Systematic Reviews.jn. and review.pt.              | 14201  |
| 6                                                                            | [approach c: based on Lee 2012]                                         | 0      |
| 7                                                                            | medline.tw. or systematic review.ti. or meta-analysis.pt. or pubmed.tw. | 433917 |
| 8                                                                            | [from our previous searches]                                            | 0      |
| 9                                                                            | (pooled analysis or pooled analyses).mp.                                | 13644  |

|    |                                                      |         |
|----|------------------------------------------------------|---------|
| 10 | (metaanalysis or meta-analysis).af.                  | 261113  |
| 11 | 3 OR 4 OR 5 OR 7 OR 9 OR 10                          | 506157  |
| 12 | (correlat* OR associat* OR regress* OR validat*).mp. | 8724508 |
| 13 | [surrogate search term]                              |         |
| 14 | biomarker*.mp. or exp biomarkers/                    | 1080881 |
| 15 | surrogate*.mp.                                       | 66611   |
| 16 | intermediate*.mp.                                    | 377243  |
| 17 | 14 OR 15 OR 16                                       | 1492820 |
| 18 | [disease-specific search term]                       | 0       |
| 19 | (human immunodeficiency virus* OR HIV).mp.           | 403760  |
| 20 | 11 AND 12 AND 17 AND 19                              | 184     |

|                                                                              |                                                                         |        |
|------------------------------------------------------------------------------|-------------------------------------------------------------------------|--------|
| <b>Ovid<br/>MEDLINE(R)<br/>ALL &lt;1946<br/>to November<br/>28, 2022&gt;</b> | <b>Hypertension</b>                                                     |        |
| 1                                                                            | [review focused search]                                                 | 0      |
| 2                                                                            | [concept: SRs]                                                          | 0      |
| 3                                                                            | (systematic adj4 review).ti.                                            | 206595 |
| 4                                                                            | systematic review.pt.                                                   | 220930 |
| 5                                                                            | Cochrane Database of Systematic Reviews.jn. and review.pt.              | 14201  |
| 6                                                                            | [approach c: based on Lee 2012]                                         | 0      |
| 7                                                                            | medline.tw. or systematic review.ti. or meta-analysis.pt. or pubmed.tw. | 433917 |
| 8                                                                            | [from our previous searches]                                            | 0      |

|    |                                                      |         |
|----|------------------------------------------------------|---------|
| 9  | (pooled analysis or pooled analyses).mp.             | 13644   |
| 10 | (metaanalysis or meta-analysis).af.                  | 261113  |
| 11 | 3 OR 4 OR 5 OR 7 OR 9 OR 10                          | 506157  |
| 12 | (correlat* OR associat* OR regress* OR validat*).mp. | 8724508 |
| 13 | [surrogate search term]                              |         |
| 14 | biomarker*.mp. or exp biomarkers/                    | 1080881 |
| 15 | surrogate*.mp.                                       | 66611   |
| 16 | intermediate*.mp.                                    | 377243  |
| 17 | 14 OR 15 OR 16                                       | 1492820 |
| 18 | [disease-specific search term]                       | 0       |
| 19 | hypertension.mp.                                     | 547605  |
| 20 | 11 AND 12 AND 17 AND 19                              | 541     |

|                                                                              |                                                                         |        |
|------------------------------------------------------------------------------|-------------------------------------------------------------------------|--------|
| <b>Ovid<br/>MEDLINE(R)<br/>ALL &lt;1946<br/>to November<br/>28, 2022&gt;</b> | <b>Hypercholesterolemia</b>                                             |        |
| 1                                                                            | [review focused search]                                                 | 0      |
| 2                                                                            | [concept: SRs]                                                          | 0      |
| 3                                                                            | (systematic adj4 review).ti.                                            | 206595 |
| 4                                                                            | systematic review.pt.                                                   | 220930 |
| 5                                                                            | Cochrane Database of Systematic Reviews.jn. and review.pt.              | 14201  |
| 6                                                                            | [approach c: based on Lee 2012]                                         | 0      |
| 7                                                                            | medline.tw. or systematic review.ti. or meta-analysis.pt. or pubmed.tw. | 433917 |

|    |                                                      |         |
|----|------------------------------------------------------|---------|
| 8  | [from our previous searches]                         | 0       |
| 9  | (pooled analysis or pooled analyses).mp.             | 13644   |
| 10 | (metaanalysis or meta-analysis).af.                  | 261113  |
| 11 | 3 OR 4 OR 5 OR 7 OR 9 OR 10                          | 506157  |
| 12 | (correlat* OR associat* OR regress* OR validat*).mp. | 8724508 |
| 13 | [surrogate search term]                              |         |
| 14 | biomarker*.mp. or exp biomarkers/                    | 1080881 |
| 15 | surrogate*.mp.                                       | 66611   |
| 16 | intermediate*.mp.                                    | 377243  |
| 17 | 14 OR 15 OR 16                                       | 1492820 |
| 18 | [disease-specific search term]                       | 0       |
| 19 | hypercholesterolemia.mp.                             | 44992   |
| 20 | 11 AND 12 AND 17 AND 19                              | 70      |

|                                                                              |                                                            |        |
|------------------------------------------------------------------------------|------------------------------------------------------------|--------|
| <b>Ovid<br/>MEDLINE(R)<br/>ALL &lt;1946<br/>to November<br/>28, 2022&gt;</b> | <b>Hyperphosphatemia</b>                                   |        |
| 1                                                                            | [review focused search]                                    | 0      |
| 2                                                                            | [concept: SRs]                                             | 0      |
| 3                                                                            | (systematic adj4 review).ti.                               | 206595 |
| 4                                                                            | systematic review.pt.                                      | 220930 |
| 5                                                                            | Cochrane Database of Systematic Reviews.jn. and review.pt. | 14201  |
| 6                                                                            | [approach c: based on Lee 2012]                            | 0      |

|    |                                                                         |         |
|----|-------------------------------------------------------------------------|---------|
| 7  | medline.tw. or systematic review.ti. or meta-analysis.pt. or pubmed.tw. | 433917  |
| 8  | [from our previous searches]                                            | 0       |
| 9  | (pooled analysis or pooled analyses).mp.                                | 13644   |
| 10 | (metaanalysis or meta-analysis).af.                                     | 261113  |
| 11 | 3 OR 4 OR 5 OR 7 OR 9 OR 10                                             | 506157  |
| 12 | (correlat* OR associat* OR regress* OR validat*).mp.                    | 8724508 |
| 13 | [surrogate search term]                                                 |         |
| 14 | biomarker*.mp. or exp biomarkers/                                       | 1080881 |
| 15 | surrogate*.mp.                                                          | 66611   |
| 16 | intermediate*.mp.                                                       | 377243  |
| 17 | 14 OR 15 OR 16                                                          | 1492820 |
| 18 | [disease-specific search term]                                          | 0       |
| 19 | hyperphosphatemia.mp.                                                   | 4480    |
| 20 | 11 AND 12 AND 17 AND 19                                                 | 5       |

|                                                                              |                                                            |        |
|------------------------------------------------------------------------------|------------------------------------------------------------|--------|
| <b>Ovid<br/>MEDLINE(R)<br/>ALL &lt;1946<br/>to November<br/>28, 2022&gt;</b> | <b>Hypertriglyceridemia</b>                                |        |
| 1                                                                            | [review focused search]                                    | 0      |
| 2                                                                            | [concept: SRs]                                             | 0      |
| 3                                                                            | (systematic adj4 review).ti.                               | 206595 |
| 4                                                                            | systematic review.pt.                                      | 220930 |
| 5                                                                            | Cochrane Database of Systematic Reviews.jn. and review.pt. | 14201  |

|    |                                                                         |         |
|----|-------------------------------------------------------------------------|---------|
| 6  | [approach c: based on Lee 2012]                                         | 0       |
| 7  | medline.tw. or systematic review.ti. or meta-analysis.pt. or pubmed.tw. | 433917  |
| 8  | [from our previous searches]                                            | 0       |
| 9  | (pooled analysis or pooled analyses).mp.                                | 13644   |
| 10 | (metaanalysis or meta-analysis).af.                                     | 261113  |
| 11 | 3 OR 4 OR 5 OR 7 OR 9 OR 10                                             | 506157  |
| 12 | (correlat* OR associat* OR regress* OR validat*).mp.                    | 8724508 |
| 13 | [surrogate search term]                                                 |         |
| 14 | biomarker*.mp. or exp biomarkers/                                       | 1080881 |
| 15 | surrogate*.mp.                                                          | 66611   |
| 16 | intermediate*.mp.                                                       | 377243  |
| 17 | 14 OR 15 OR 16                                                          | 1492820 |
| 18 | [disease-specific search term]                                          | 0       |
| 19 | hypertriglyceridemia.mp.                                                | 15439   |
| 20 | 11 AND 12 AND 17 AND 19                                                 | 21      |

|                                                                              |                              |        |
|------------------------------------------------------------------------------|------------------------------|--------|
| <b>Ovid<br/>MEDLINE(R)<br/>ALL &lt;1946<br/>to November<br/>28, 2022&gt;</b> | <b>Hypothyroidism</b>        |        |
| 1                                                                            | [review focused search]      | 0      |
| 2                                                                            | [concept: SRs]               | 0      |
| 3                                                                            | (systematic adj4 review).ti. | 206595 |
| 4                                                                            | systematic review.pt.        | 220930 |

|    |                                                                         |         |
|----|-------------------------------------------------------------------------|---------|
| 5  | Cochrane Database of Systematic Reviews.jn. and review.pt.              | 14201   |
| 6  | [approach c: based on Lee 2012]                                         | 0       |
| 7  | medline.tw. or systematic review.ti. or meta-analysis.pt. or pubmed.tw. | 433917  |
| 8  | [from our previous searches]                                            | 0       |
| 9  | (pooled analysis or pooled analyses).mp.                                | 13644   |
| 10 | (metaanalysis or meta-analysis).af.                                     | 261113  |
| 11 | 3 OR 4 OR 5 OR 7 OR 9 OR 10                                             | 506157  |
| 12 | (correlat* OR associat* OR regress* OR validat*).mp.                    | 8724508 |
| 13 | [surrogate search term]                                                 |         |
| 14 | biomarker*.mp. or exp biomarkers/                                       | 1080881 |
| 15 | surrogate*.mp.                                                          | 66611   |
| 16 | intermediate*.mp.                                                       | 377243  |
| 17 | 14 OR 15 OR 16                                                          | 1492820 |
| 18 | [disease-specific search term]                                          | 0       |
| 19 | hypothyroidism.mp.                                                      | 46824   |
| 20 | 11 AND 12 AND 17 AND 19                                                 | 36      |

|                                                                              |                              |        |
|------------------------------------------------------------------------------|------------------------------|--------|
| <b>Ovid<br/>MEDLINE(R)<br/>ALL &lt;1946<br/>to November<br/>28, 2022&gt;</b> | <b>Lupus nephritis</b>       |        |
| 1                                                                            | [review focused search]      | 0      |
| 2                                                                            | [concept: SRs]               | 0      |
| 3                                                                            | (systematic adj4 review).ti. | 206595 |



|    |                                                                         |         |
|----|-------------------------------------------------------------------------|---------|
| 4  | systematic review.pt.                                                   | 220930  |
| 5  | Cochrane Database of Systematic Reviews.jn. and review.pt.              | 14201   |
| 6  | [approach c: based on Lee 2012]                                         | 0       |
| 7  | medline.tw. or systematic review.ti. or meta-analysis.pt. or pubmed.tw. | 433917  |
| 8  | [from our previous searches]                                            | 0       |
| 9  | (pooled analysis or pooled analyses).mp.                                | 13644   |
| 10 | (metaanalysis or meta-analysis).af.                                     | 261113  |
| 11 | 3 OR 4 OR 5 OR 7 OR 9 OR 10                                             | 506157  |
| 12 | (correlat* OR associat* OR regress* OR validat*).mp.                    | 8724508 |
| 13 | [surrogate search term]                                                 |         |
| 14 | biomarker*.mp. or exp biomarkers/                                       | 1080881 |
| 15 | surrogate*.mp.                                                          | 66611   |
| 16 | intermediate*.mp.                                                       | 377243  |
| 17 | 14 OR 15 OR 16                                                          | 1492820 |
| 18 | [disease-specific search term]                                          | 0       |
| 19 | lupus*.mp.                                                              | 99147   |
| 20 | 11 AND 12 AND 17 AND 19                                                 | 163     |

|                                                                              |                                                       |   |
|------------------------------------------------------------------------------|-------------------------------------------------------|---|
| <b>Ovid<br/>MEDLINE(R)<br/>ALL &lt;1946<br/>to November<br/>28, 2022&gt;</b> | <b>Mycobacterium avium complex (MAC) lung disease</b> |   |
| 1                                                                            | [review focused search]                               | 0 |

|    |                                                                         |         |
|----|-------------------------------------------------------------------------|---------|
| 2  | [concept: SRs]                                                          | 0       |
| 3  | (systematic adj4 review).ti.                                            | 206595  |
| 4  | systematic review.pt.                                                   | 220930  |
| 5  | Cochrane Database of Systematic Reviews.jn. and review.pt.              | 14201   |
| 6  | [approach c: based on Lee 2012]                                         | 0       |
| 7  | medline.tw. or systematic review.ti. or meta-analysis.pt. or pubmed.tw. | 433917  |
| 8  | [from our previous searches]                                            | 0       |
| 9  | (pooled analysis or pooled analyses).mp.                                | 13644   |
| 10 | (metaanalysis or meta-analysis).af.                                     | 261113  |
| 11 | 3 OR 4 OR 5 OR 7 OR 9 OR 10                                             | 506157  |
| 12 | (correlat* OR associat* OR regress* OR validat*).mp.                    | 8724508 |
| 13 | [surrogate search term]                                                 |         |
| 14 | biomarker*.mp. or exp biomarkers/                                       | 1080881 |
| 15 | surrogate*.mp.                                                          | 66611   |
| 16 | intermediate*.mp.                                                       | 377243  |
| 17 | 14 OR 15 OR 16                                                          | 1492820 |
| 18 | [disease-specific search term]                                          | 0       |
| 19 | (mycobacterium avium complex lung disease OR MAC).mp.                   | 19246   |
| 20 | 11 AND 12 AND 17 AND 19                                                 | 14      |

|                                                                              |                                            |  |
|------------------------------------------------------------------------------|--------------------------------------------|--|
| <b>Ovid<br/>MEDLINE(R)<br/>ALL &lt;1946<br/>to November<br/>28, 2022&gt;</b> | <b>Nonalcoholic steatohepatitis (NASH)</b> |  |
|------------------------------------------------------------------------------|--------------------------------------------|--|

|    |                                                                         |         |
|----|-------------------------------------------------------------------------|---------|
| 1  | [review focused search]                                                 | 0       |
| 2  | [concept: SRs]                                                          | 0       |
| 3  | (systematic adj4 review).ti.                                            | 206595  |
| 4  | systematic review.pt.                                                   | 220930  |
| 5  | Cochrane Database of Systematic Reviews.jn. and review.pt.              | 14201   |
| 6  | [approach c: based on Lee 2012]                                         | 0       |
| 7  | medline.tw. or systematic review.ti. or meta-analysis.pt. or pubmed.tw. | 433917  |
| 8  | [from our previous searches]                                            | 0       |
| 9  | (pooled analysis or pooled analyses).mp.                                | 13644   |
| 10 | (metaanalysis or meta-analysis).af.                                     | 261113  |
| 11 | 3 OR 4 OR 5 OR 7 OR 9 OR 10                                             | 506157  |
| 12 | (correlat* OR associat* OR regress* OR validat*).mp.                    | 8724508 |
| 13 | [surrogate search term]                                                 |         |
| 14 | biomarker*.mp. or exp biomarkers/                                       | 1080881 |
| 15 | surrogate*.mp.                                                          | 66611   |
| 16 | intermediate*.mp.                                                       | 377243  |
| 17 | 14 OR 15 OR 16                                                          | 1492820 |
| 18 | [disease-specific search term]                                          | 0       |
| 19 | nonalcoholic steatohepatitis or NASH.mp.                                | 15032   |
| 20 | 11 AND 12 AND 17 AND 19                                                 | 62      |

|                                             |                            |  |
|---------------------------------------------|----------------------------|--|
| <b>Ovid<br/>MEDLINE(R)<br/>ALL &lt;1946</b> | <b>Opioid use disorder</b> |  |
|---------------------------------------------|----------------------------|--|

|                                 |                                                                                          |         |
|---------------------------------|------------------------------------------------------------------------------------------|---------|
| <b>to November 28, 2022&gt;</b> |                                                                                          |         |
| 1                               | [review focused search]                                                                  | 0       |
| 2                               | [concept: SRs]                                                                           | 0       |
| 3                               | (systematic adj4 review).ti.                                                             | 206595  |
| 4                               | systematic review.pt.                                                                    | 220930  |
| 5                               | Cochrane Database of Systematic Reviews.jn. and review.pt.                               | 14201   |
| 6                               | [approach c: based on Lee 2012]                                                          | 0       |
| 7                               | medline.tw. or systematic review.ti. or meta-analysis.pt. or pubmed.tw.                  | 433917  |
| 8                               | [from our previous searches]                                                             | 0       |
| 9                               | (pooled analysis or pooled analyses).mp.                                                 | 13644   |
| 10                              | (metaanalysis or meta-analysis).af.                                                      | 261113  |
| 11                              | 3 OR 4 OR 5 OR 7 OR 9 OR 10                                                              | 506157  |
| 12                              | (correlat* OR associat* OR regress* OR validat*).mp.                                     | 8724508 |
| 13                              | [surrogate search term]                                                                  |         |
| 14                              | biomarker*.mp. or exp biomarkers/                                                        | 1080881 |
| 15                              | surrogate*.mp.                                                                           | 66611   |
| 16                              | intermediate*.mp.                                                                        | 377243  |
| 17                              | 14 OR 15 OR 16                                                                           | 1492820 |
| 18                              | [disease-specific search term]                                                           | 0       |
| 19                              | (OUD OR opioid use disorder OR opioid abuse OR opioid dependence OR opioid addiction).mp | 11368   |
| 20                              | 11 AND 12 AND 17 AND 19                                                                  | 4       |

|                                                                              |                                                                         |         |
|------------------------------------------------------------------------------|-------------------------------------------------------------------------|---------|
| <b>Ovid<br/>MEDLINE(R)<br/>ALL &lt;1946<br/>to November<br/>28, 2022&gt;</b> | <b>Osteoporosis</b>                                                     |         |
| 1                                                                            | [review focused search]                                                 | 0       |
| 2                                                                            | [concept: SRs]                                                          | 0       |
| 3                                                                            | (systematic adj4 review).ti.                                            | 206595  |
| 4                                                                            | systematic review.pt.                                                   | 220930  |
| 5                                                                            | Cochrane Database of Systematic Reviews.jn. and review.pt.              | 14201   |
| 6                                                                            | [approach c: based on Lee 2012]                                         | 0       |
| 7                                                                            | medline.tw. or systematic review.ti. or meta-analysis.pt. or pubmed.tw. | 433917  |
| 8                                                                            | [from our previous searches]                                            | 0       |
| 9                                                                            | (pooled analysis or pooled analyses).mp.                                | 13644   |
| 10                                                                           | (metaanalysis or meta-analysis).af.                                     | 261113  |
| 11                                                                           | 3 OR 4 OR 5 OR 7 OR 9 OR 10                                             | 506157  |
| 12                                                                           | (correlat* OR associat* OR regress* OR validat*).mp.                    | 8724508 |
| 13                                                                           | [surrogate search term]                                                 |         |
| 14                                                                           | biomarker*.mp. or exp biomarkers/                                       | 1080881 |
| 15                                                                           | surrogate*.mp.                                                          | 66611   |
| 16                                                                           | intermediate*.mp.                                                       | 377243  |
| 17                                                                           | 14 OR 15 OR 16                                                          | 1492820 |
| 18                                                                           | [disease-specific search term]                                          | 0       |
| 19                                                                           | osteoporosis.mp.                                                        | 98387   |
| 20                                                                           | 11 AND 12 AND 17 AND 19                                                 | 107     |

|                                                                              |                                                                         |         |
|------------------------------------------------------------------------------|-------------------------------------------------------------------------|---------|
| <b>Ovid<br/>MEDLINE(R)<br/>ALL &lt;1946<br/>to November<br/>28, 2022&gt;</b> | <b>Paget's disease</b>                                                  |         |
| 1                                                                            | [review focused search]                                                 | 0       |
| 2                                                                            | [concept: SRs]                                                          | 0       |
| 3                                                                            | (systematic adj4 review).ti.                                            | 206595  |
| 4                                                                            | systematic review.pt.                                                   | 220930  |
| 5                                                                            | Cochrane Database of Systematic Reviews.jn. and review.pt.              | 14201   |
| 6                                                                            | [approach c: based on Lee 2012]                                         | 0       |
| 7                                                                            | medline.tw. or systematic review.ti. or meta-analysis.pt. or pubmed.tw. | 433917  |
| 8                                                                            | [from our previous searches]                                            | 0       |
| 9                                                                            | (pooled analysis or pooled analyses).mp.                                | 13644   |
| 10                                                                           | (metaanalysis or meta-analysis).af.                                     | 261113  |
| 11                                                                           | 3 OR 4 OR 5 OR 7 OR 9 OR 10                                             | 506157  |
| 12                                                                           | (correlat* OR associat* OR regress* OR validat*).mp.                    | 8724508 |
| 13                                                                           | [surrogate search term]                                                 |         |
| 14                                                                           | biomarker*.mp. or exp biomarkers/                                       | 1080881 |
| 15                                                                           | surrogate*.mp.                                                          | 66611   |
| 16                                                                           | intermediate*.mp.                                                       | 377243  |
| 17                                                                           | 14 OR 15 OR 16                                                          | 1492820 |
| 18                                                                           | [disease-specific search term]                                          | 0       |
| 19                                                                           | Paget*.mp.                                                              | 10604   |

|    |                         |   |
|----|-------------------------|---|
| 20 | 11 AND 12 AND 17 AND 19 | 6 |
|----|-------------------------|---|

|                                                                              |                                                                         |         |
|------------------------------------------------------------------------------|-------------------------------------------------------------------------|---------|
| <b>Ovid<br/>MEDLINE(R)<br/>ALL &lt;1946<br/>to November<br/>28, 2022&gt;</b> | <b>Primary biliary cholangitis</b>                                      |         |
| 1                                                                            | [review focused search]                                                 | 0       |
| 2                                                                            | [concept: SRs]                                                          | 0       |
| 3                                                                            | (systematic adj4 review).ti.                                            | 206595  |
| 4                                                                            | systematic review.pt.                                                   | 220930  |
| 5                                                                            | Cochrane Database of Systematic Reviews.jn. and review.pt.              | 14201   |
| 6                                                                            | [approach c: based on Lee 2012]                                         | 0       |
| 7                                                                            | medline.tw. or systematic review.ti. or meta-analysis.pt. or pubmed.tw. | 433917  |
| 8                                                                            | [from our previous searches]                                            | 0       |
| 9                                                                            | (pooled analysis or pooled analyses).mp.                                | 13644   |
| 10                                                                           | (metaanalysis or meta-analysis).af.                                     | 261113  |
| 11                                                                           | 3 OR 4 OR 5 OR 7 OR 9 OR 10                                             | 506157  |
| 12                                                                           | (correlat* OR associat* OR regress* OR validat*).mp.                    | 8724508 |
| 13                                                                           | [surrogate search term]                                                 |         |
| 14                                                                           | biomarker*.mp. or exp biomarkers/                                       | 1080881 |
| 15                                                                           | surrogate*.mp.                                                          | 66611   |
| 16                                                                           | intermediate*.mp.                                                       | 377243  |
| 17                                                                           | 14 OR 15 OR 16                                                          | 1492820 |
| 18                                                                           | [disease-specific search term]                                          | 0       |

|    |                         |      |
|----|-------------------------|------|
| 19 | biliary cholangitis.mp. | 1642 |
| 20 | 11 AND 12 AND 17 AND 19 | 3    |

|                                                                              |                                                                            |         |
|------------------------------------------------------------------------------|----------------------------------------------------------------------------|---------|
| <b>Ovid<br/>MEDLINE(R)<br/>ALL &lt;1946<br/>to November<br/>28, 2022&gt;</b> | <b>Primary glomerular diseases associated with significant proteinuria</b> |         |
| 1                                                                            | [review focused search]                                                    | 0       |
| 2                                                                            | [concept: SRs]                                                             | 0       |
| 3                                                                            | (systematic adj4 review).ti.                                               | 206595  |
| 4                                                                            | systematic review.pt.                                                      | 220930  |
| 5                                                                            | Cochrane Database of Systematic Reviews.jn. and review.pt.                 | 14201   |
| 6                                                                            | [approach c: based on Lee 2012]                                            | 0       |
| 7                                                                            | medline.tw. or systematic review.ti. or meta-analysis.pt. or pubmed.tw.    | 433917  |
| 8                                                                            | [from our previous searches]                                               | 0       |
| 9                                                                            | (pooled analysis or pooled analyses).mp.                                   | 13644   |
| 10                                                                           | (metaanalysis or meta-analysis).af.                                        | 261113  |
| 11                                                                           | 3 OR 4 OR 5 OR 7 OR 9 OR 10                                                | 506157  |
| 12                                                                           | (correlat* OR associat* OR regress* OR validat*).mp.                       | 8724508 |
| 13                                                                           | [surrogate search term]                                                    |         |
| 14                                                                           | biomarker*.mp. or exp biomarkers/                                          | 1080881 |
| 15                                                                           | surrogate*.mp.                                                             | 66611   |
| 16                                                                           | intermediate*.mp.                                                          | 377243  |
| 17                                                                           | 14 OR 15 OR 16                                                             | 1492820 |



|    |                                |      |
|----|--------------------------------|------|
| 18 | [disease-specific search term] | 0    |
| 19 | glomerular disease.mp          | 3587 |
| 20 | 11 AND 12 AND 17 AND 19        | 5    |

|                                                                              |                                                                         |         |
|------------------------------------------------------------------------------|-------------------------------------------------------------------------|---------|
| <b>Ovid<br/>MEDLINE(R)<br/>ALL &lt;1946<br/>to November<br/>28, 2022&gt;</b> | <b>Primary hyperparathyroidism</b>                                      |         |
| 1                                                                            | [review focused search]                                                 | 0       |
| 2                                                                            | [concept: SRs]                                                          | 0       |
| 3                                                                            | (systematic adj4 review).ti.                                            | 206595  |
| 4                                                                            | systematic review.pt.                                                   | 220930  |
| 5                                                                            | Cochrane Database of Systematic Reviews.jn. and review.pt.              | 14201   |
| 6                                                                            | [approach c: based on Lee 2012]                                         | 0       |
| 7                                                                            | medline.tw. or systematic review.ti. or meta-analysis.pt. or pubmed.tw. | 433917  |
| 8                                                                            | [from our previous searches]                                            | 0       |
| 9                                                                            | (pooled analysis or pooled analyses).mp.                                | 13644   |
| 10                                                                           | (metaanalysis or meta-analysis).af.                                     | 261113  |
| 11                                                                           | 3 OR 4 OR 5 OR 7 OR 9 OR 10                                             | 506157  |
| 12                                                                           | (correlat* OR associat* OR regress* OR validat*).mp.                    | 8724508 |
| 13                                                                           | [surrogate search term]                                                 |         |
| 14                                                                           | biomarker*.mp. or exp biomarkers/                                       | 1080881 |
| 15                                                                           | surrogate*.mp.                                                          | 66611   |
| 16                                                                           | intermediate*.mp.                                                       | 377243  |

|    |                                |         |
|----|--------------------------------|---------|
| 17 | 14 OR 15 OR 16                 | 1492820 |
| 18 | [disease-specific search term] | 0       |
| 19 | hyperparathyroidism.mp.        | 30977   |
| 20 | 11 AND 12 AND 17 AND 19        | 14      |

|                                                                              |                                                                         |         |
|------------------------------------------------------------------------------|-------------------------------------------------------------------------|---------|
| <b>Ovid<br/>MEDLINE(R)<br/>ALL &lt;1946<br/>to November<br/>28, 2022&gt;</b> | <b>Pulmonary fibrosis</b>                                               |         |
| 1                                                                            | [review focused search]                                                 | 0       |
| 2                                                                            | [concept: SRs]                                                          | 0       |
| 3                                                                            | (systematic adj4 review).ti.                                            | 206595  |
| 4                                                                            | systematic review.pt.                                                   | 220930  |
| 5                                                                            | Cochrane Database of Systematic Reviews.jn. and review.pt.              | 14201   |
| 6                                                                            | [approach c: based on Lee 2012]                                         | 0       |
| 7                                                                            | medline.tw. or systematic review.ti. or meta-analysis.pt. or pubmed.tw. | 433917  |
| 8                                                                            | [from our previous searches]                                            | 0       |
| 9                                                                            | (pooled analysis or pooled analyses).mp.                                | 13644   |
| 10                                                                           | (metaanalysis or meta-analysis).af.                                     | 261113  |
| 11                                                                           | 3 OR 4 OR 5 OR 7 OR 9 OR 10                                             | 506157  |
| 12                                                                           | (correlat* OR associat* OR regress* OR validat*).mp.                    | 8724508 |
| 13                                                                           | [surrogate search term]                                                 |         |
| 14                                                                           | biomarker*.mp. or exp biomarkers/                                       | 1080881 |
| 15                                                                           | surrogate*.mp.                                                          | 66611   |

|    |                                |         |
|----|--------------------------------|---------|
| 16 | intermediate*.mp.              | 377243  |
| 17 | 14 OR 15 OR 16                 | 1492820 |
| 18 | [disease-specific search term] | 0       |
| 19 | pulmonary fibrosis.mp.         | 34701   |
| 20 | 11 AND 12 AND 17 AND 19        | 34      |

|                                                                              |                                                                         |         |
|------------------------------------------------------------------------------|-------------------------------------------------------------------------|---------|
| <b>Ovid<br/>MEDLINE(R)<br/>ALL &lt;1946<br/>to November<br/>28, 2022&gt;</b> | <b>Pulmonary tuberculosis</b>                                           |         |
| 1                                                                            | [review focused search]                                                 | 0       |
| 2                                                                            | [concept: SRs]                                                          | 0       |
| 3                                                                            | (systematic adj4 review).ti.                                            | 206595  |
| 4                                                                            | systematic review.pt.                                                   | 220930  |
| 5                                                                            | Cochrane Database of Systematic Reviews.jn. and review.pt.              | 14201   |
| 6                                                                            | [approach c: based on Lee 2012]                                         | 0       |
| 7                                                                            | medline.tw. or systematic review.ti. or meta-analysis.pt. or pubmed.tw. | 433917  |
| 8                                                                            | [from our previous searches]                                            | 0       |
| 9                                                                            | (pooled analysis or pooled analyses).mp.                                | 13644   |
| 10                                                                           | (metaanalysis or meta-analysis).af.                                     | 261113  |
| 11                                                                           | 3 OR 4 OR 5 OR 7 OR 9 OR 10                                             | 506157  |
| 12                                                                           | (correlat* OR associat* OR regress* OR validat*).mp.                    | 8724508 |
| 13                                                                           | [surrogate search term]                                                 |         |
| 14                                                                           | biomarker*.mp. or exp biomarkers/                                       | 1080881 |

|    |                                |         |
|----|--------------------------------|---------|
| 15 | surrogate*.mp.                 | 66611   |
| 16 | intermediate*.mp.              | 377243  |
| 17 | 14 OR 15 OR 16                 | 1492820 |
| 18 | [disease-specific search term] | 0       |
| 19 | pulmonary tuberculosis.mp.     | 35540   |
| 20 | 11 AND 12 AND 17 AND 19        | 18      |

|                                                                              |                                                                             |         |
|------------------------------------------------------------------------------|-----------------------------------------------------------------------------|---------|
| <b>Ovid<br/>MEDLINE(R)<br/>ALL &lt;1946<br/>to November<br/>28, 2022&gt;</b> | <b>Secondary hyperparathyroidism associated with chronic kidney disease</b> |         |
| 1                                                                            | [review focused search]                                                     | 0       |
| 2                                                                            | [concept: SRs]                                                              | 0       |
| 3                                                                            | (systematic adj4 review).ti.                                                | 206595  |
| 4                                                                            | systematic review.pt.                                                       | 220930  |
| 5                                                                            | Cochrane Database of Systematic Reviews.jn. and review.pt.                  | 14201   |
| 6                                                                            | [approach c: based on Lee 2012]                                             | 0       |
| 7                                                                            | medline.tw. or systematic review.ti. or meta-analysis.pt. or pubmed.tw.     | 433917  |
| 8                                                                            | [from our previous searches]                                                | 0       |
| 9                                                                            | (pooled analysis or pooled analyses).mp.                                    | 13644   |
| 10                                                                           | (metaanalysis or meta-analysis).af.                                         | 261113  |
| 11                                                                           | 3 OR 4 OR 5 OR 7 OR 9 OR 10                                                 | 506157  |
| 12                                                                           | (correlat* OR associat* OR regress* OR validat*).mp.                        | 8724508 |
| 13                                                                           | [surrogate search term]                                                     |         |

|    |                                                             |         |
|----|-------------------------------------------------------------|---------|
| 14 | biomarker*.mp. or exp biomarkers/                           | 1080881 |
| 15 | surrogate*.mp.                                              | 66611   |
| 16 | intermediate*.mp.                                           | 377243  |
| 17 | 14 OR 15 OR 16                                              | 1492820 |
| 18 | [disease-specific search term]                              | 0       |
| 19 | hyperparathyroidism AND (chronic kidney disease or CKD).mp. | 2911    |
| 20 | 11 AND 12 AND 17 AND 19                                     | 7       |

|                                                                              |                                                                         |         |
|------------------------------------------------------------------------------|-------------------------------------------------------------------------|---------|
| <b>Ovid<br/>MEDLINE(R)<br/>ALL &lt;1946<br/>to November<br/>28, 2022&gt;</b> | <b>Systemic sclerosis-interstitial lung disease</b>                     |         |
| 1                                                                            | [review focused search]                                                 | 0       |
| 2                                                                            | [concept: SRs]                                                          | 0       |
| 3                                                                            | (systematic adj4 review).ti.                                            | 206595  |
| 4                                                                            | systematic review.pt.                                                   | 220930  |
| 5                                                                            | Cochrane Database of Systematic Reviews.jn. and review.pt.              | 14201   |
| 6                                                                            | [approach c: based on Lee 2012]                                         | 0       |
| 7                                                                            | medline.tw. or systematic review.ti. or meta-analysis.pt. or pubmed.tw. | 433917  |
| 8                                                                            | [from our previous searches]                                            | 0       |
| 9                                                                            | (pooled analysis or pooled analyses).mp.                                | 13644   |
| 10                                                                           | (metaanalysis or meta-analysis).af.                                     | 261113  |
| 11                                                                           | 3 OR 4 OR 5 OR 7 OR 9 OR 10                                             | 506157  |
| 12                                                                           | (correlat* OR associat* OR regress* OR validat*).mp.                    | 8724508 |

|    |                                                                                                    |         |
|----|----------------------------------------------------------------------------------------------------|---------|
| 13 | [surrogate search term]                                                                            |         |
| 14 | biomarker*.mp. or exp biomarkers/                                                                  | 1080881 |
| 15 | surrogate*.mp.                                                                                     | 66611   |
| 16 | intermediate*.mp.                                                                                  | 377243  |
| 17 | 14 OR 15 OR 16                                                                                     | 1492820 |
| 18 | [disease-specific search term]                                                                     | 0       |
| 19 | (systemic sclerosis interstitial lung disease or systemic sclerosis-interstitial lung disease).mp. | 57      |
| 20 | 11 AND 12 AND 17 AND 19                                                                            | 1       |

|                                                                              |                                                                         |        |
|------------------------------------------------------------------------------|-------------------------------------------------------------------------|--------|
| <b>Ovid<br/>MEDLINE(R)<br/>ALL &lt;1946<br/>to November<br/>28, 2022&gt;</b> | <b>Tobacco dependence</b>                                               |        |
| 1                                                                            | [review focused search]                                                 | 0      |
| 2                                                                            | [concept: SRs]                                                          | 0      |
| 3                                                                            | (systematic adj4 review).ti.                                            | 206595 |
| 4                                                                            | systematic review.pt.                                                   | 220930 |
| 5                                                                            | Cochrane Database of Systematic Reviews.jn. and review.pt.              | 14201  |
| 6                                                                            | [approach c: based on Lee 2012]                                         | 0      |
| 7                                                                            | medline.tw. or systematic review.ti. or meta-analysis.pt. or pubmed.tw. | 433917 |
| 8                                                                            | [from our previous searches]                                            | 0      |
| 9                                                                            | (pooled analysis or pooled analyses).mp.                                | 13644  |
| 10                                                                           | (metaanalysis or meta-analysis).af.                                     | 261113 |
| 11                                                                           | 3 OR 4 OR 5 OR 7 OR 9 OR 10                                             | 506157 |

|    |                                                      |         |
|----|------------------------------------------------------|---------|
| 12 | (correlat* OR associat* OR regress* OR validat*).mp. | 8724508 |
| 13 | [surrogate search term]                              |         |
| 14 | biomarker*.mp. or exp biomarkers/                    | 1080881 |
| 15 | surrogate*.mp.                                       | 66611   |
| 16 | intermediate*.mp.                                    | 377243  |
| 17 | 14 OR 15 OR 16                                       | 1492820 |
| 18 | [disease-specific search term]                       | 0       |
| 19 | (tobacco dependence or nicotine dependence).mp.      | 7806    |
| 20 | 11 AND 12 AND 17 AND 19                              | 7       |

|                                                                              |                                                                         |        |
|------------------------------------------------------------------------------|-------------------------------------------------------------------------|--------|
| <b>Ovid<br/>MEDLINE(R)<br/>ALL &lt;1946<br/>to November<br/>28, 2022&gt;</b> | <b>Type 2 diabetes mellitus</b>                                         |        |
| 1                                                                            | [review focused search]                                                 | 0      |
| 2                                                                            | [concept: SRs]                                                          | 0      |
| 3                                                                            | (systematic adj4 review).ti.                                            | 206595 |
| 4                                                                            | systematic review.pt.                                                   | 220930 |
| 5                                                                            | Cochrane Database of Systematic Reviews.jn. and review.pt.              | 14201  |
| 6                                                                            | [approach c: based on Lee 2012]                                         | 0      |
| 7                                                                            | medline.tw. or systematic review.ti. or meta-analysis.pt. or pubmed.tw. | 433917 |
| 8                                                                            | [from our previous searches]                                            | 0      |
| 9                                                                            | (pooled analysis or pooled analyses).mp.                                | 13644  |
| 10                                                                           | (metaanalysis or meta-analysis).af.                                     | 261113 |

|    |                                                      |         |
|----|------------------------------------------------------|---------|
| 11 | 3 OR 4 OR 5 OR 7 OR 9 OR 10                          | 506157  |
| 12 | (correlat* OR associat* OR regress* OR validat*).mp. | 8724508 |
| 13 | [surrogate search term]                              |         |
| 14 | biomarker*.mp. or exp biomarkers/                    | 1080881 |
| 15 | surrogate*.mp.                                       | 66611   |
| 16 | intermediate*.mp.                                    | 377243  |
| 17 | 14 OR 15 OR 16                                       | 1492820 |
| 18 | [disease-specific search term]                       | 0       |
| 19 | (type 2 diabetes or type II diabetes or T2D).mp.     | 167982  |
| 20 | 11 AND 12 AND 17 AND 19                              | 580     |

### Update search results

|                                                                           |                                                            |        |
|---------------------------------------------------------------------------|------------------------------------------------------------|--------|
| <b>Ovid<br/>MEDLINE(R)<br/>ALL &lt;1946<br/>to March 19,<br/>2023&gt;</b> | <b>Alzheimer's Disease</b>                                 |        |
| 1                                                                         | [review focused search]                                    | 0      |
| 2                                                                         | [concept: SRs]                                             | 0      |
| 3                                                                         | (systematic adj4 review).ti.                               | 217307 |
| 4                                                                         | systematic review.pt.                                      | 223463 |
| 5                                                                         | Cochrane Database of Systematic Reviews.jn. and review.pt. | 14296  |
| 6                                                                         | [approach c: based on Lee 2012]                            | 0      |



|    |                                                                                            |         |
|----|--------------------------------------------------------------------------------------------|---------|
| 7  | medline.tw. or systematic review.ti. or meta-analysis.pt. or pubmed.tw.                    | 451208  |
| 8  | [from our previous searches]                                                               | 0       |
| 9  | (pooled analysis or pooled analyses).mp.                                                   | 14123   |
| 10 | (metaanalysis or meta-analysis).af.                                                        | 270617  |
| 11 | 3 OR 4 OR 5 OR 7 OR 9 OR 10                                                                | 525827  |
|    | [correlation focused search terms]                                                         |         |
| 12 | (correlat* OR associat* OR regress* OR validat*).mp.                                       | 8916597 |
|    | [disease-specific search term]                                                             | 0       |
| 14 | Alzheimer*.mp.                                                                             | 196852  |
| 15 | [surrogate specific search term]                                                           | 0       |
| 16 | (amyloid* OR beta-amyloid OR betaamyloid OR neuritic OR senile OR peptide* OR plaque*).mp. | 1138775 |
| 17 | 11 AND 12 AND 14 AND 16                                                                    | 508     |

|                                                                           |                                                                         |        |
|---------------------------------------------------------------------------|-------------------------------------------------------------------------|--------|
| <b>Ovid<br/>MEDLINE(R)<br/>ALL &lt;1946<br/>to March 19,<br/>2023&gt;</b> | <b>Asthma</b>                                                           |        |
| 1                                                                         | [review focused search]                                                 | 0      |
| 2                                                                         | [concept: SRs]                                                          | 0      |
| 3                                                                         | (systematic adj4 review).ti.                                            | 217307 |
| 4                                                                         | systematic review.pt.                                                   | 223463 |
| 5                                                                         | Cochrane Database of Systematic Reviews.jn. and review.pt.              | 14296  |
| 6                                                                         | [approach c: based on Lee 2012]                                         | 0      |
| 7                                                                         | medline.tw. or systematic review.ti. or meta-analysis.pt. or pubmed.tw. | 451208 |

|    |                                                                                 |         |
|----|---------------------------------------------------------------------------------|---------|
| 8  | [from our previous searches]                                                    | 0       |
| 9  | (pooled analysis or pooled analyses).mp.                                        | 14123   |
| 10 | (metaanalysis or meta-analysis).af.                                             | 270617  |
| 11 | 3 OR 4 OR 5 OR 7 OR 9 OR 10                                                     | 525827  |
| 12 | (correlat* OR associat* OR regress* OR validat*).mp.                            | 8916597 |
| 13 | [disease-specific search term]                                                  | 0       |
| 14 | asthma*.mp.                                                                     | 200443  |
| 15 | [surrogate specific search term]                                                | 0       |
| 16 | (FEV* OR forced expiratory volume OR respiratory function OR vital capacity)mp. | 366758  |
| 17 | 11 AND 12 AND 14 AND 16                                                         | 473     |

|                                                                           |                                                                         |        |
|---------------------------------------------------------------------------|-------------------------------------------------------------------------|--------|
| <b>Ovid<br/>MEDLINE(R)<br/>ALL &lt;1946<br/>to March 19,<br/>2023&gt;</b> | <b>Chronic Kidney Disease</b>                                           |        |
| 1                                                                         | [review focused search]                                                 | 0      |
| 2                                                                         | [concept: SRs]                                                          | 0      |
| 3                                                                         | (systematic adj4 review).ti.                                            | 217307 |
| 4                                                                         | systematic review.pt.                                                   | 223463 |
| 5                                                                         | Cochrane Database of Systematic Reviews.jn. and review.pt.              | 14296  |
| 6                                                                         | [approach c: based on Lee 2012]                                         | 0      |
| 7                                                                         | medline.tw. or systematic review.ti. or meta-analysis.pt. or pubmed.tw. | 451208 |
| 8                                                                         | [from our previous searches]                                            | 0      |
| 9                                                                         | (pooled analysis or pooled analyses).mp.                                | 14123  |

|    |                                                        |         |
|----|--------------------------------------------------------|---------|
| 10 | (metaanalysis or meta-analysis).af.                    | 270617  |
| 11 | 3 OR 4 OR 5 OR 7 OR 9 OR 10                            | 525827  |
| 12 | (correlat* OR associat* OR regress* OR validat*).mp.   | 8916597 |
| 13 | <b>[disease-specific search term]</b>                  | 0       |
| 14 | (chronic kidney disease OR CKD).mp.                    | 77800   |
| 15 | [surrogate specific search term]                       | 0       |
| 16 | eGFR OR GFR OR glomerular filtration OR creatinine.mp. | 271961  |
| 17 | 11 AND 12 AND 14 AND 16                                | 599     |

|                                                                           |                                                                         |        |
|---------------------------------------------------------------------------|-------------------------------------------------------------------------|--------|
| <b>Ovid<br/>MEDLINE(R)<br/>ALL &lt;1946<br/>to March 19,<br/>2023&gt;</b> | <b>Chronic Obstructive Pulmonary Disease (COPD)</b>                     |        |
| 1                                                                         | [review focused search]                                                 | 0      |
| 2                                                                         | [concept: SRs]                                                          | 0      |
| 3                                                                         | (systematic adj4 review).ti.                                            | 217307 |
| 4                                                                         | systematic review.pt.                                                   | 223463 |
| 5                                                                         | Cochrane Database of Systematic Reviews.jn. and review.pt.              | 14296  |
| 6                                                                         | [approach c: based on Lee 2012]                                         | 0      |
| 7                                                                         | medline.tw. or systematic review.ti. or meta-analysis.pt. or pubmed.tw. | 451208 |
| 8                                                                         | [from our previous searches]                                            | 0      |
| 9                                                                         | (pooled analysis or pooled analyses).mp.                                | 14123  |
| 10                                                                        | (metaanalysis or meta-analysis).af.                                     | 270617 |
| 11                                                                        | 3 OR 4 OR 5 OR 7 OR 9 OR 10                                             | 525827 |

|    |                                                                                  |         |
|----|----------------------------------------------------------------------------------|---------|
| 12 | (correlat* OR associat* OR regress* OR validat*).mp.                             | 8916597 |
| 13 | [disease-specific search term]                                                   | 0       |
| 14 | (chronic obstructive pulmonary disease OR COPD).mp.                              | 78106   |
| 15 | [surrogate specific search term]                                                 | 0       |
| 16 | (FEV* OR forced expiratory volume OR respiratory function OR vital capacity).mp. | 366758  |
| 17 | 11 AND 12 AND 14 AND 16                                                          | 454     |

|                                                                           |                                                                         |         |
|---------------------------------------------------------------------------|-------------------------------------------------------------------------|---------|
| <b>Ovid<br/>MEDLINE(R)<br/>ALL &lt;1946<br/>to March 19,<br/>2023&gt;</b> | <b>Cushing's disease/syndrome</b>                                       |         |
| 1                                                                         | [review focused search]                                                 | 0       |
| 2                                                                         | [concept: SRs]                                                          | 0       |
| 3                                                                         | (systematic adj4 review).ti.                                            | 217307  |
| 4                                                                         | systematic review.pt.                                                   | 223463  |
| 5                                                                         | Cochrane Database of Systematic Reviews.jn. and review.pt.              | 14296   |
| 6                                                                         | [approach c: based on Lee 2012]                                         | 0       |
| 7                                                                         | medline.tw. or systematic review.ti. or meta-analysis.pt. or pubmed.tw. | 451208  |
| 8                                                                         | [from our previous searches]                                            | 0       |
| 9                                                                         | (pooled analysis or pooled analyses).mp.                                | 14123   |
| 10                                                                        | (metaanalysis or meta-analysis).af.                                     | 270617  |
| 11                                                                        | 3 OR 4 OR 5 OR 7 OR 9 OR 10                                             | 525827  |
| 12                                                                        | (correlat* OR associat* OR regress* OR validat*).mp.                    | 8916597 |
| 13                                                                        | [disease-specific search term]                                          | 0       |

|    |                                  |        |
|----|----------------------------------|--------|
| 14 | Cushing*.mp.                     | 19916  |
| 15 | [surrogate specific search term] | 0      |
| 16 | (UFC OR urine OR cortisol).mp.   | 455995 |
| 17 | 11 AND 12 AND 14 AND 16          | 52     |

|                                                                           |                                                                         |         |
|---------------------------------------------------------------------------|-------------------------------------------------------------------------|---------|
| <b>Ovid<br/>MEDLINE(R)<br/>ALL &lt;1946<br/>to March 19,<br/>2023&gt;</b> | <b>Exocrine pancreatic insufficiency</b>                                |         |
| 1                                                                         | [review focused search]                                                 | 0       |
| 2                                                                         | [concept: SRs]                                                          | 0       |
| 3                                                                         | (systematic adj4 review).ti.                                            | 217307  |
| 4                                                                         | systematic review.pt.                                                   | 223463  |
| 5                                                                         | Cochrane Database of Systematic Reviews.jn. and review.pt.              | 14296   |
| 6                                                                         | [approach c: based on Lee 2012]                                         | 0       |
| 7                                                                         | medline.tw. or systematic review.ti. or meta-analysis.pt. or pubmed.tw. | 451208  |
| 8                                                                         | [from our previous searches]                                            | 0       |
| 9                                                                         | (pooled analysis or pooled analyses).mp.                                | 14123   |
| 10                                                                        | (metaanalysis or meta-analysis).af.                                     | 270617  |
| 11                                                                        | 3 OR 4 OR 5 OR 7 OR 9 OR 10                                             | 525827  |
| 12                                                                        | (correlat* OR associat* OR regress* OR validat*).mp.                    | 8916597 |
| 13                                                                        | [disease-specific search term]                                          | 0       |
| 14                                                                        | pancreat*.mp.                                                           | 320289  |
| 15                                                                        | [surrogate specific search term]                                        | 0       |

|    |                                                                |       |
|----|----------------------------------------------------------------|-------|
| 16 | (CFA OR coefficient of fat absorption OR (fecal adj4 fat)).mp. | 13250 |
| 17 | 11 AND 12 AND 14 AND 16                                        | 7     |

|                                                                           |                                                                         |         |
|---------------------------------------------------------------------------|-------------------------------------------------------------------------|---------|
| <b>Ovid<br/>MEDLINE(R)<br/>ALL &lt;1946<br/>to March 19,<br/>2023&gt;</b> | <b>Gout</b>                                                             |         |
| 1                                                                         | [review focused search]                                                 | 0       |
| 2                                                                         | [concept: SRs]                                                          | 0       |
| 3                                                                         | (systematic adj4 review).ti.                                            | 217307  |
| 4                                                                         | systematic review.pt.                                                   | 223463  |
| 5                                                                         | Cochrane Database of Systematic Reviews.jn. and review.pt.              | 14296   |
| 6                                                                         | [approach c: based on Lee 2012]                                         | 0       |
| 7                                                                         | medline.tw. or systematic review.ti. or meta-analysis.pt. or pubmed.tw. | 451208  |
| 8                                                                         | [from our previous searches]                                            | 0       |
| 9                                                                         | (pooled analysis or pooled analyses).mp.                                | 14123   |
| 10                                                                        | (metaanalysis or meta-analysis).af.                                     | 270617  |
| 11                                                                        | 3 OR 4 OR 5 OR 7 OR 9 OR 10                                             | 525827  |
| 12                                                                        | (correlat* OR associat* OR regress* OR validat*).mp.                    | 8916597 |
| 13                                                                        | [disease-specific search term]                                          | 0       |
| 14                                                                        | gout*.mp.                                                               | 22197   |
| 15                                                                        | [surrogate specific search term]                                        | 0       |
| 16                                                                        | (uric acid OR urate).mp.                                                | 48781   |
| 17                                                                        | 11 AND 12 AND 14 AND 16                                                 | 181     |

|                                                                           |                                                                         |         |
|---------------------------------------------------------------------------|-------------------------------------------------------------------------|---------|
| <b>Ovid<br/>MEDLINE(R)<br/>ALL &lt;1946<br/>to March 19,<br/>2023&gt;</b> | <b>Hepatitis B Virus (HBV)</b>                                          |         |
| 1                                                                         | [review focused search]                                                 | 0       |
| 2                                                                         | [concept: SRs]                                                          | 0       |
| 3                                                                         | (systematic adj4 review).ti.                                            | 217307  |
| 4                                                                         | systematic review.pt.                                                   | 223463  |
| 5                                                                         | Cochrane Database of Systematic Reviews.jn. and review.pt.              | 14296   |
| 6                                                                         | [approach c: based on Lee 2012]                                         | 0       |
| 7                                                                         | medline.tw. or systematic review.ti. or meta-analysis.pt. or pubmed.tw. | 451208  |
| 8                                                                         | [from our previous searches]                                            | 0       |
| 9                                                                         | (pooled analysis or pooled analyses).mp.                                | 14123   |
| 10                                                                        | (metaanalysis or meta-analysis).af.                                     | 270617  |
| 11                                                                        | 3 OR 4 OR 5 OR 7 OR 9 OR 10                                             | 525827  |
| 12                                                                        | (correlat* OR associat* OR regress* OR validat*).mp.                    | 8916597 |
| 13                                                                        | [disease-specific search term]                                          | 0       |
| 14                                                                        | (hepatitis B OR HBV).mp.                                                | 113939  |
| 15                                                                        | [surrogate specific search term]                                        | 0       |
| 16                                                                        | (undetectable OR HBsAg OR surface anti*).mp.                            | 100673  |
| 17                                                                        | 11 AND 12 AND 14 AND 16                                                 | 211     |

|                                                                           |                                                                         |         |
|---------------------------------------------------------------------------|-------------------------------------------------------------------------|---------|
| <b>Ovid<br/>MEDLINE(R)<br/>ALL &lt;1946<br/>to March 19,<br/>2023&gt;</b> | <b>Hepatitis C Virus (HCV)</b>                                          |         |
| 1                                                                         | [review focused search]                                                 | 0       |
| 2                                                                         | [concept: SRs]                                                          | 0       |
| 3                                                                         | (systematic adj4 review).ti.                                            | 217307  |
| 4                                                                         | systematic review.pt.                                                   | 223463  |
| 5                                                                         | Cochrane Database of Systematic Reviews.jn. and review.pt.              | 14296   |
| 6                                                                         | [approach c: based on Lee 2012]                                         | 0       |
| 7                                                                         | medline.tw. or systematic review.ti. or meta-analysis.pt. or pubmed.tw. | 451208  |
| 8                                                                         | [from our previous searches]                                            | 0       |
| 9                                                                         | (pooled analysis or pooled analyses).mp.                                | 14123   |
| 10                                                                        | (metaanalysis or meta-analysis).af.                                     | 270617  |
| 11                                                                        | 3 OR 4 OR 5 OR 7 OR 9 OR 10                                             | 525827  |
| 12                                                                        | (correlat* OR associat* OR regress* OR validat*).mp.                    | 8916597 |
| 13                                                                        | [disease-specific search term]                                          | 0       |
| 14                                                                        | (hepatitis C OR HCV).mp.                                                | 106159  |
| 15                                                                        | [surrogate specific search term]                                        | 0       |
| 16                                                                        | ((sustained adj4 response) OR SVR).mp.                                  | 23194   |
| 17                                                                        | 11 AND 12 AND 14 AND 16                                                 | 319     |

|                                             |                                |  |
|---------------------------------------------|--------------------------------|--|
| <b>Ovid<br/>MEDLINE(R)<br/>ALL &lt;1946</b> | <b>Hepatitis D Virus (HDV)</b> |  |
|---------------------------------------------|--------------------------------|--|



|                    |                                                                         |         |
|--------------------|-------------------------------------------------------------------------|---------|
| to March 19, 2023> |                                                                         |         |
| 1                  | [review focused search]                                                 | 0       |
| 2                  | [concept: SRs]                                                          | 0       |
| 3                  | (systematic adj4 review).ti.                                            | 217307  |
| 4                  | systematic review.pt.                                                   | 223463  |
| 5                  | Cochrane Database of Systematic Reviews.jn. and review.pt.              | 14296   |
| 6                  | [approach c: based on Lee 2012]                                         | 0       |
| 7                  | medline.tw. or systematic review.ti. or meta-analysis.pt. or pubmed.tw. | 451208  |
| 8                  | [from our previous searches]                                            | 0       |
| 9                  | (pooled analysis or pooled analyses).mp.                                | 14123   |
| 10                 | (metaanalysis or meta-analysis).af.                                     | 270617  |
| 11                 | 3 OR 4 OR 5 OR 7 OR 9 OR 10                                             | 525827  |
| 12                 | (correlat* OR associat* OR regress* OR validat*).mp.                    | 8916597 |
| 13                 | [disease-specific search term]                                          | 0       |
| 14                 | (hepatitis D OR HDV).mp.                                                | 4353    |
| 15                 | [surrogate specific search term]                                        | 0       |
| 16                 | (ALT OR LFT OR liver function test OR alanine transaminase).mp.         | 68385   |
| 17                 | 11 AND 12 AND 14 AND 16                                                 | 2       |

|                                                           |                                               |  |
|-----------------------------------------------------------|-----------------------------------------------|--|
| <b>Ovid MEDLINE(R) ALL &lt;1946 to March 19, 2023&gt;</b> | <b>Human Immunodeficiency Viurs-1 (HIV-1)</b> |  |
|-----------------------------------------------------------|-----------------------------------------------|--|

|    |                                                                         |         |
|----|-------------------------------------------------------------------------|---------|
| 1  | [review focused search]                                                 | 0       |
| 2  | [concept: SRs]                                                          | 0       |
| 3  | (systematic adj4 review).ti.                                            | 217307  |
| 4  | systematic review.pt.                                                   | 223463  |
| 5  | Cochrane Database of Systematic Reviews.jn. and review.pt.              | 14296   |
| 6  | [approach c: based on Lee 2012]                                         | 0       |
| 7  | medline.tw. or systematic review.ti. or meta-analysis.pt. or pubmed.tw. | 451208  |
| 8  | [from our previous searches]                                            | 0       |
| 9  | (pooled analysis or pooled analyses).mp.                                | 14123   |
| 10 | (metaanalysis or meta-analysis).af.                                     | 270617  |
| 11 | 3 OR 4 OR 5 OR 7 OR 9 OR 10                                             | 525827  |
| 12 | (correlat* OR associat* OR regress* OR validat*).mp.                    | 8916597 |
| 13 | [disease-specific search term]                                          | 0       |
| 14 | (human immunodeficiency virus* OR HIV).mp.                              | 408572  |
| 15 | [surrogate specific search term]                                        | 0       |
| 16 | (undetectable OR RNA OR antibody test OR antibod* OR plasma OR RNA).mp. | 3343917 |
| 17 | 11 AND 12 AND 14 AND 16                                                 | 375     |

|                                                                           |                         |   |
|---------------------------------------------------------------------------|-------------------------|---|
| <b>Ovid<br/>MEDLINE(R)<br/>ALL &lt;1946<br/>to March 19,<br/>2023&gt;</b> | <b>Hypertension</b>     |   |
| 1                                                                         | [review focused search] | 0 |
| 2                                                                         | [concept: SRs]          | 0 |

|    |                                                                         |         |
|----|-------------------------------------------------------------------------|---------|
| 3  | (systematic adj4 review).ti.                                            | 217307  |
| 4  | systematic review.pt.                                                   | 223463  |
| 5  | Cochrane Database of Systematic Reviews.jn. and review.pt.              | 14296   |
| 6  | [approach c: based on Lee 2012]                                         | 0       |
| 7  | medline.tw. or systematic review.ti. or meta-analysis.pt. or pubmed.tw. | 451208  |
| 8  | [from our previous searches]                                            | 0       |
| 9  | (pooled analysis or pooled analyses).mp.                                | 14123   |
| 10 | (metaanalysis or meta-analysis).af.                                     | 270617  |
| 11 | 3 OR 4 OR 5 OR 7 OR 9 OR 10                                             | 525827  |
| 12 | (correlat* OR associat* OR regress* OR validat*).mp.                    | 8916597 |
| 13 | [disease-specific search term]                                          | 0       |
| 14 | (HTN OR hypertension OR blood pressure)mp.                              | 869218  |
| 15 | [surrogate specific search term]                                        | 0       |
| 16 | (BP OR blood pressure).mp.                                              | 630099  |
| 17 | 11 AND 12 AND 14 AND 16                                                 | 5192    |

|                                                                           |                              |        |
|---------------------------------------------------------------------------|------------------------------|--------|
| <b>Ovid<br/>MEDLINE(R)<br/>ALL &lt;1946<br/>to March 19,<br/>2023&gt;</b> | <b>Hypercholesterolemia</b>  |        |
| 1                                                                         | [review focused search]      | 0      |
| 2                                                                         | [concept: SRs]               | 0      |
| 3                                                                         | (systematic adj4 review).ti. | 217307 |
| 4                                                                         | systematic review.pt.        | 223463 |

|    |                                                                         |         |
|----|-------------------------------------------------------------------------|---------|
| 5  | Cochrane Database of Systematic Reviews.jn. and review.pt.              | 14296   |
| 6  | [approach c: based on Lee 2012]                                         | 0       |
| 7  | medline.tw. or systematic review.ti. or meta-analysis.pt. or pubmed.tw. | 451208  |
| 8  | [from our previous searches]                                            | 0       |
| 9  | (pooled analysis or pooled analyses).mp.                                | 14123   |
| 10 | (metaanalysis or meta-analysis).af.                                     | 270617  |
| 11 | 3 OR 4 OR 5 OR 7 OR 9 OR 10                                             | 525827  |
| 12 | (correlat* OR associat* OR regress* OR validat*).mp.                    | 8916597 |
| 13 | [disease-specific search term]                                          | 0       |
| 14 | (hypercholesterolemia OR cholesterol).mp.                               | 338307  |
| 15 | [surrogate specific search term]                                        | 0       |
| 16 | Exp Cholesterol/ OR cholesterol.mp.                                     | 321901  |
| 17 | 11 AND 12 AND 14 AND 16                                                 | 3455    |

|                                                                           |                                                            |        |
|---------------------------------------------------------------------------|------------------------------------------------------------|--------|
| <b>Ovid<br/>MEDLINE(R)<br/>ALL &lt;1946<br/>to March 19,<br/>2023&gt;</b> | <b>Hyperphosphatemia</b>                                   |        |
| 1                                                                         | [review focused search]                                    | 0      |
| 2                                                                         | [concept: SRs]                                             | 0      |
| 3                                                                         | (systematic adj4 review).ti.                               | 217307 |
| 4                                                                         | systematic review.pt.                                      | 223463 |
| 5                                                                         | Cochrane Database of Systematic Reviews.jn. and review.pt. | 14296  |
| 6                                                                         | [approach c: based on Lee 2012]                            | 0      |

|    |                                                                         |         |
|----|-------------------------------------------------------------------------|---------|
| 7  | medline.tw. or systematic review.ti. or meta-analysis.pt. or pubmed.tw. | 451208  |
| 8  | [from our previous searches]                                            | 0       |
| 9  | (pooled analysis or pooled analyses).mp.                                | 14123   |
| 10 | (metaanalysis or meta-analysis).af.                                     | 270617  |
| 11 | 3 OR 4 OR 5 OR 7 OR 9 OR 10                                             | 525827  |
| 12 | (correlat* OR associat* OR regress* OR validat*).mp.                    | 8916597 |
| 13 | [disease-specific search term]                                          | 0       |
| 14 | (hyperphosphatemia OR phosphate).mp.                                    | 311047  |
| 15 | [surrogate specific search term]                                        | 0       |
| 16 | phosphate.mp.                                                           | 308948  |
| 17 | 11 AND 12 AND 14 AND 16                                                 | 555     |

|                                                                           |                                                                         |        |
|---------------------------------------------------------------------------|-------------------------------------------------------------------------|--------|
| <b>Ovid<br/>MEDLINE(R)<br/>ALL &lt;1946<br/>to March 19,<br/>2023&gt;</b> | <b>Hypertriglyceridemia</b>                                             |        |
| 1                                                                         | [review focused search]                                                 | 0      |
| 2                                                                         | [concept: SRs]                                                          | 0      |
| 3                                                                         | (systematic adj4 review).ti.                                            | 217307 |
| 4                                                                         | systematic review.pt.                                                   | 223463 |
| 5                                                                         | Cochrane Database of Systematic Reviews.jn. and review.pt.              | 14296  |
| 6                                                                         | [approach c: based on Lee 2012]                                         | 0      |
| 7                                                                         | medline.tw. or systematic review.ti. or meta-analysis.pt. or pubmed.tw. | 451208 |

|    |                                                      |         |
|----|------------------------------------------------------|---------|
| 8  | [from our previous searches]                         | 0       |
| 9  | (pooled analysis or pooled analyses).mp.             | 14123   |
| 10 | (metaanalysis or meta-analysis).af.                  | 270617  |
| 11 | 3 OR 4 OR 5 OR 7 OR 9 OR 10                          | 525827  |
| 12 | (correlat* OR associat* OR regress* OR validat*).mp. | 8916597 |
| 13 | [disease-specific search term]                       | 0       |
| 14 | (hypertriglyceridemia OR triglyceride*).mp.          | 171689  |
| 15 | [surrogate specific search term]                     | 0       |
| 16 | triglyceride*.mp.                                    | 165068  |
| 17 | 11 AND 12 AND 14 AND 16                              | 1869    |

|                                                                           |                                                                         |        |
|---------------------------------------------------------------------------|-------------------------------------------------------------------------|--------|
| <b>Ovid<br/>MEDLINE(R)<br/>ALL &lt;1946<br/>to March 19,<br/>2023&gt;</b> | <b>Hypothyroidism</b>                                                   |        |
| 1                                                                         | [review focused search]                                                 | 0      |
| 2                                                                         | [concept: SRs]                                                          | 0      |
| 3                                                                         | (systematic adj4 review).ti.                                            | 217307 |
| 4                                                                         | systematic review.pt.                                                   | 223463 |
| 5                                                                         | Cochrane Database of Systematic Reviews.jn. and review.pt.              | 14296  |
| 6                                                                         | [approach c: based on Lee 2012]                                         | 0      |
| 7                                                                         | medline.tw. or systematic review.ti. or meta-analysis.pt. or pubmed.tw. | 451208 |
| 8                                                                         | [from our previous searches]                                            | 0      |
| 9                                                                         | (pooled analysis or pooled analyses).mp.                                | 14123  |

|    |                                                         |         |
|----|---------------------------------------------------------|---------|
| 10 | (metaanalysis or meta-analysis).af.                     | 270617  |
| 11 | 3 OR 4 OR 5 OR 7 OR 9 OR 10                             | 525827  |
| 12 | (correlat* OR associat* OR regress* OR validat*).mp.    | 8916597 |
| 13 | [disease-specific search term]                          | 0       |
| 14 | (hypothyroidism OR thyroid).mp.                         | 255731  |
| 15 | [surrogate specific search term]                        | 0       |
| 16 | (TSH OR thyroid stimulating OR thyroid-stimulating).mp. | 41303   |
| 17 | 11 AND 12 AND 14 AND 16                                 | 338     |

|                                                                           |                                                                         |        |
|---------------------------------------------------------------------------|-------------------------------------------------------------------------|--------|
| <b>Ovid<br/>MEDLINE(R)<br/>ALL &lt;1946<br/>to March 19,<br/>2023&gt;</b> | <b>Lupus nephritis</b>                                                  |        |
| 1                                                                         | [review focused search]                                                 | 0      |
| 2                                                                         | [concept: SRs]                                                          | 0      |
| 3                                                                         | (systematic adj4 review).ti.                                            | 217307 |
| 4                                                                         | systematic review.pt.                                                   | 223463 |
| 5                                                                         | Cochrane Database of Systematic Reviews.jn. and review.pt.              | 14296  |
| 6                                                                         | [approach c: based on Lee 2012]                                         | 0      |
| 7                                                                         | medline.tw. or systematic review.ti. or meta-analysis.pt. or pubmed.tw. | 451208 |
| 8                                                                         | [from our previous searches]                                            | 0      |
| 9                                                                         | (pooled analysis or pooled analyses).mp.                                | 14123  |
| 10                                                                        | (metaanalysis or meta-analysis).af.                                     | 270617 |
| 11                                                                        | 3 OR 4 OR 5 OR 7 OR 9 OR 10                                             | 525827 |

|    |                                                                                                                                                                                                                                          |         |
|----|------------------------------------------------------------------------------------------------------------------------------------------------------------------------------------------------------------------------------------------|---------|
| 12 | (correlat* OR associat* OR regress* OR validat*).mp.                                                                                                                                                                                     | 8916597 |
| 13 | [disease-specific search term]                                                                                                                                                                                                           | 0       |
| 14 | lupus*.mp.                                                                                                                                                                                                                               | 100524  |
| 15 | [surrogate specific search term]                                                                                                                                                                                                         | 0       |
| 16 | (CRR OR complete renal response OR proteinuria OR albuminuria OR (urin* adj4 protein) OR UPCR OR (protein adj4 creatinine) OR eGFR OR GFR OR glomerular filtration OR serum creatinine OR (creatinine adj4 blood) OR renal function).mp. | 270834  |
| 17 | 11 AND 12 AND 14 AND 16                                                                                                                                                                                                                  | 62      |

|                                                           |                                                                         |        |
|-----------------------------------------------------------|-------------------------------------------------------------------------|--------|
| <b>Ovid MEDLINE(R) ALL &lt;1946 to March 19, 2023&gt;</b> | <b>Mycobacterium avium complex (MAC) lung disease</b>                   |        |
| 1                                                         | [review focused search]                                                 | 0      |
| 2                                                         | [concept: SRs]                                                          | 0      |
| 3                                                         | (systematic adj4 review).ti.                                            | 217307 |
| 4                                                         | systematic review.pt.                                                   | 223463 |
| 5                                                         | Cochrane Database of Systematic Reviews.jn. and review.pt.              | 14296  |
| 6                                                         | [approach c: based on Lee 2012]                                         | 0      |
| 7                                                         | medline.tw. or systematic review.ti. or meta-analysis.pt. or pubmed.tw. | 451208 |
| 8                                                         | [from our previous searches]                                            | 0      |
| 9                                                         | (pooled analysis or pooled analyses).mp.                                | 14123  |
| 10                                                        | (metaanalysis or meta-analysis).af.                                     | 270617 |
| 11                                                        | 3 OR 4 OR 5 OR 7 OR 9 OR 10                                             | 525827 |



|    |                                                                                       |         |
|----|---------------------------------------------------------------------------------------|---------|
| 12 | (correlat* OR associat* OR regress* OR validat*).mp.                                  | 8916597 |
| 13 | [disease-specific search term]                                                        | 0       |
| 14 | (mycobacterium avium complex OR MAC).mp.                                              | 22315   |
| 15 | [surrogate specific search term]                                                      | 0       |
| 16 | ((culture adj4 conversion) OR (smear adj4 conversion) OR (culture adj4 negative)).mp. | 12752   |
| 17 | 11 AND 12 AND 14 AND 16                                                               | 5       |

|                                                                           |                                                                         |         |
|---------------------------------------------------------------------------|-------------------------------------------------------------------------|---------|
| <b>Ovid<br/>MEDLINE(R)<br/>ALL &lt;1946<br/>to March 19,<br/>2023&gt;</b> | <b>Nonalcoholic steatohepatitis (NASH)</b>                              |         |
| 1                                                                         | [review focused search]                                                 | 0       |
| 2                                                                         | [concept: SRs]                                                          | 0       |
| 3                                                                         | (systematic adj4 review).ti.                                            | 217307  |
| 4                                                                         | systematic review.pt.                                                   | 223463  |
| 5                                                                         | Cochrane Database of Systematic Reviews.jn. and review.pt.              | 14296   |
| 6                                                                         | [approach c: based on Lee 2012]                                         | 0       |
| 7                                                                         | medline.tw. or systematic review.ti. or meta-analysis.pt. or pubmed.tw. | 451208  |
| 8                                                                         | [from our previous searches]                                            | 0       |
| 9                                                                         | (pooled analysis or pooled analyses).mp.                                | 14123   |
| 10                                                                        | (metaanalysis or meta-analysis).af.                                     | 270617  |
| 11                                                                        | 3 OR 4 OR 5 OR 7 OR 9 OR 10                                             | 525827  |
| 12                                                                        | (correlat* OR associat* OR regress* OR validat*).mp.                    | 8916597 |
| 13                                                                        | [disease-specific search term]                                          | 0       |

|    |                                                                                                                         |       |
|----|-------------------------------------------------------------------------------------------------------------------------|-------|
| 14 | (nonalcoholic steatohepatitis OR NASH OR NAFLD OR (fatty liver adj4 disease)).mp. OR Non-alcoholic Fatty Liver Disease/ | 43578 |
| 15 | [surrogate specific search term]                                                                                        | 0     |
| 16 | ((resolution OR no worsening OR improvement) AND fibrosis).mp.                                                          | 14570 |
| 17 | 11 AND 12 AND 14 AND 16                                                                                                 | 35    |

|                                                           |                                                                         |         |
|-----------------------------------------------------------|-------------------------------------------------------------------------|---------|
| <b>Ovid MEDLINE(R) ALL &lt;1946 to March 19, 2023&gt;</b> | <b>Opioid use disorder</b>                                              |         |
| 1                                                         | [review focused search]                                                 | 0       |
| 2                                                         | [concept: SRs]                                                          | 0       |
| 3                                                         | (systematic adj4 review).ti.                                            | 217307  |
| 4                                                         | systematic review.pt.                                                   | 223463  |
| 5                                                         | Cochrane Database of Systematic Reviews.jn. and review.pt.              | 14296   |
| 6                                                         | [approach c: based on Lee 2012]                                         | 0       |
| 7                                                         | medline.tw. or systematic review.ti. or meta-analysis.pt. or pubmed.tw. | 451208  |
| 8                                                         | [from our previous searches]                                            | 0       |
| 9                                                         | (pooled analysis or pooled analyses).mp.                                | 14123   |
| 10                                                        | (metaanalysis or meta-analysis).af.                                     | 270617  |
| 11                                                        | 3 OR 4 OR 5 OR 7 OR 9 OR 10                                             | 525827  |
| 12                                                        | (correlat* OR associat* OR regress* OR validat*).mp.                    | 8916597 |
| 13                                                        | [disease-specific search term]                                          | 0       |

|    |                                                                                                                       |        |
|----|-----------------------------------------------------------------------------------------------------------------------|--------|
| 14 | (OUD OR opioid use disorder OR opioid abuse OR opioid dependence OR opioid addiction).mp OR Opioid-Related Disorders/ | 25840  |
| 15 | [surrogate specific search term]                                                                                      | 0      |
| 16 | urine.mp.                                                                                                             | 392211 |
| 17 | 11 AND 12 AND 14 AND 16                                                                                               | 29     |

|                                                           |                                                                         |         |
|-----------------------------------------------------------|-------------------------------------------------------------------------|---------|
| <b>Ovid MEDLINE(R) ALL &lt;1946 to March 19, 2023&gt;</b> | <b>Osteoporosis</b>                                                     |         |
| 1                                                         | [review focused search]                                                 | 0       |
| 2                                                         | [concept: SRs]                                                          | 0       |
| 3                                                         | (systematic adj4 review).ti.                                            | 217307  |
| 4                                                         | systematic review.pt.                                                   | 223463  |
| 5                                                         | Cochrane Database of Systematic Reviews.jn. and review.pt.              | 14296   |
| 6                                                         | [approach c: based on Lee 2012]                                         | 0       |
| 7                                                         | medline.tw. or systematic review.ti. or meta-analysis.pt. or pubmed.tw. | 451208  |
| 8                                                         | [from our previous searches]                                            | 0       |
| 9                                                         | (pooled analysis or pooled analyses).mp.                                | 14123   |
| 10                                                        | (metaanalysis or meta-analysis).af.                                     | 270617  |
| 11                                                        | 3 OR 4 OR 5 OR 7 OR 9 OR 10                                             | 525827  |
| 12                                                        | (correlat* OR associat* OR regress* OR validat*).mp.                    | 8916597 |
| 13                                                        | [disease-specific search term]                                          | 0       |
| 14                                                        | osteoporosis.mp.                                                        | 100134  |

|    |                                                         |        |
|----|---------------------------------------------------------|--------|
| 15 | [surrogate specific search term]                        | 0      |
| 16 | (fracture* OR BMD OR bone density OR bone mineral*).mp. | 425199 |
| 17 | 11 AND 12 AND 14 AND 16                                 | 1323   |

|                                                                           |                                                                         |         |
|---------------------------------------------------------------------------|-------------------------------------------------------------------------|---------|
| <b>Ovid<br/>MEDLINE(R)<br/>ALL &lt;1946<br/>to March 19,<br/>2023&gt;</b> | <b>Paget's Disease</b>                                                  |         |
| 1                                                                         | [review focused search]                                                 | 0       |
| 2                                                                         | [concept: SRs]                                                          | 0       |
| 3                                                                         | (systematic adj4 review).ti.                                            | 217307  |
| 4                                                                         | systematic review.pt.                                                   | 223463  |
| 5                                                                         | Cochrane Database of Systematic Reviews.jn. and review.pt.              | 14296   |
| 6                                                                         | [approach c: based on Lee 2012]                                         | 0       |
| 7                                                                         | medline.tw. or systematic review.ti. or meta-analysis.pt. or pubmed.tw. | 451208  |
| 8                                                                         | [from our previous searches]                                            | 0       |
| 9                                                                         | (pooled analysis or pooled analyses).mp.                                | 14123   |
| 10                                                                        | (metaanalysis or meta-analysis).af.                                     | 270617  |
| 11                                                                        | 3 OR 4 OR 5 OR 7 OR 9 OR 10                                             | 525827  |
| 12                                                                        | (correlat* OR associat* OR regress* OR validat*).mp.                    | 8916597 |
| 13                                                                        | [disease-specific search term]                                          | 0       |
| 14                                                                        | Paget*.mp.                                                              | 10722   |
| 15                                                                        | [surrogate specific search term]                                        | 0       |
| 16                                                                        | (alkaline phosphatase OR ALP OR LFT OR liver function test).mp.         | 110904  |

|    |                         |   |
|----|-------------------------|---|
| 17 | 11 AND 12 AND 14 AND 16 | 9 |
|----|-------------------------|---|

|                                                                           |                                                                              |         |
|---------------------------------------------------------------------------|------------------------------------------------------------------------------|---------|
| <b>Ovid<br/>MEDLINE(R)<br/>ALL &lt;1946<br/>to March 19,<br/>2023&gt;</b> | <b>Primary biliary cholangitis</b>                                           |         |
| 1                                                                         | [review focused search]                                                      | 0       |
| 2                                                                         | [concept: SRs]                                                               | 0       |
| 3                                                                         | (systematic adj4 review).ti.                                                 | 217307  |
| 4                                                                         | systematic review.pt.                                                        | 223463  |
| 5                                                                         | Cochrane Database of Systematic Reviews.jn. and review.pt.                   | 14296   |
| 6                                                                         | [approach c: based on Lee 2012]                                              | 0       |
| 7                                                                         | medline.tw. or systematic review.ti. or meta-analysis.pt. or pubmed.tw.      | 451208  |
| 8                                                                         | [from our previous searches]                                                 | 0       |
| 9                                                                         | (pooled analysis or pooled analyses).mp.                                     | 14123   |
| 10                                                                        | (metaanalysis or meta-analysis).af.                                          | 270617  |
| 11                                                                        | 3 OR 4 OR 5 OR 7 OR 9 OR 10                                                  | 525827  |
| 12                                                                        | (correlat* OR associat* OR regress* OR validat*).mp.                         | 8916597 |
| 13                                                                        | [disease-specific search term]                                               | 0       |
| 14                                                                        | (cholangitis OR PBC).mp.                                                     | 25863   |
| 15                                                                        | [surrogate specific search term]                                             | 0       |
| 16                                                                        | (alkaline phosphatase OR ALP OR bilirubin OR LFT OR liver function test).mp. | 155243  |
| 17                                                                        | 11 AND 12 AND 14 AND 16                                                      | 30      |

|                                                           |                                                                                   |         |
|-----------------------------------------------------------|-----------------------------------------------------------------------------------|---------|
| <b>Ovid MEDLINE(R) ALL &lt;1946 to March 19, 2023&gt;</b> | <b>Primary glomerular disease associated with significant proteinuria</b>         |         |
| 1                                                         | [review focused search]                                                           | 0       |
| 2                                                         | [concept: SRs]                                                                    | 0       |
| 3                                                         | (systematic adj4 review).ti.                                                      | 217307  |
| 4                                                         | systematic review.pt.                                                             | 223463  |
| 5                                                         | Cochrane Database of Systematic Reviews.jn. and review.pt.                        | 14296   |
| 6                                                         | [approach c: based on Lee 2012]                                                   | 0       |
| 7                                                         | medline.tw. or systematic review.ti. or meta-analysis.pt. or pubmed.tw.           | 451208  |
| 8                                                         | [from our previous searches]                                                      | 0       |
| 9                                                         | (pooled analysis or pooled analyses).mp.                                          | 14123   |
| 10                                                        | (metaanalysis or meta-analysis).af.                                               | 270617  |
| 11                                                        | 3 OR 4 OR 5 OR 7 OR 9 OR 10                                                       | 525827  |
| 12                                                        | (correlat* OR associat* OR regress* OR validat*).mp.                              | 8916597 |
| 13                                                        | [disease-specific search term]                                                    | 0       |
| 14                                                        | glomerular disease.mp.                                                            | 3675    |
| 15                                                        | [surrogate specific search term]                                                  | 0       |
| 16                                                        | (proteinuria OR albuminuria OR (urin* adj4 albumin) OR (urine* adj4 protein)).mp. | 86752   |
| 17                                                        | 11 AND 12 AND 14 AND 16                                                           | 16      |

|                                     |                                    |  |
|-------------------------------------|------------------------------------|--|
| <b>Ovid MEDLINE(R) ALL &lt;1946</b> | <b>Primary hyperparathyroidism</b> |  |
|-------------------------------------|------------------------------------|--|

|                    |                                                                         |         |
|--------------------|-------------------------------------------------------------------------|---------|
| to March 19, 2023> |                                                                         |         |
| 1                  | [review focused search]                                                 | 0       |
| 2                  | [concept: SRs]                                                          | 0       |
| 3                  | (systematic adj4 review).ti.                                            | 217307  |
| 4                  | systematic review.pt.                                                   | 223463  |
| 5                  | Cochrane Database of Systematic Reviews.jn. and review.pt.              | 14296   |
| 6                  | [approach c: based on Lee 2012]                                         | 0       |
| 7                  | medline.tw. or systematic review.ti. or meta-analysis.pt. or pubmed.tw. | 451208  |
| 8                  | [from our previous searches]                                            | 0       |
| 9                  | (pooled analysis or pooled analyses).mp.                                | 14123   |
| 10                 | (metaanalysis or meta-analysis).af.                                     | 270617  |
| 11                 | 3 OR 4 OR 5 OR 7 OR 9 OR 10                                             | 525827  |
| 12                 | (correlat* OR associat* OR regress* OR validat*).mp.                    | 8916597 |
| 13                 | [disease-specific search term]                                          | 0       |
| 14                 | (hyperparathyroidism OR parathyroid).mp.                                | 77170   |
| 15                 | [surrogate specific search term]                                        | 0       |
| 16                 | (calcium OR blood test OR hypercalcemia).mp.                            | 664360  |
| 17                 | 11 AND 12 AND 14 AND 16                                                 | 218     |

|                                                           |                           |  |
|-----------------------------------------------------------|---------------------------|--|
| <b>Ovid MEDLINE(R) ALL &lt;1946 to March 19, 2023&gt;</b> | <b>Pulmonary fibrosis</b> |  |
|-----------------------------------------------------------|---------------------------|--|

|    |                                                                         |         |
|----|-------------------------------------------------------------------------|---------|
| 1  | [review focused search]                                                 | 0       |
| 2  | [concept: SRs]                                                          | 0       |
| 3  | (systematic adj4 review).ti.                                            | 217307  |
| 4  | systematic review.pt.                                                   | 223463  |
| 5  | Cochrane Database of Systematic Reviews.jn. and review.pt.              | 14296   |
| 6  | [approach c: based on Lee 2012]                                         | 0       |
| 7  | medline.tw. or systematic review.ti. or meta-analysis.pt. or pubmed.tw. | 451208  |
| 8  | [from our previous searches]                                            | 0       |
| 9  | (pooled analysis or pooled analyses).mp.                                | 14123   |
| 10 | (metaanalysis or meta-analysis).af.                                     | 270617  |
| 11 | 3 OR 4 OR 5 OR 7 OR 9 OR 10                                             | 525827  |
| 12 | (correlat* OR associat* OR regress* OR validat*).mp.                    | 8916597 |
| 13 | [disease-specific search term]                                          | 0       |
| 14 | pulmonary fibrosis.mp.                                                  | 35388   |
| 15 | [surrogate specific search term]                                        | 0       |
| 16 | (FVC OR forced vital capacity).mp.                                      | 22234   |
| 17 | 11 AND 12 AND 14 AND 16                                                 | 56      |

|                                                                           |                               |   |
|---------------------------------------------------------------------------|-------------------------------|---|
| <b>Ovid<br/>MEDLINE(R)<br/>ALL &lt;1946<br/>to March 19,<br/>2023&gt;</b> | <b>Pulmonary tuberculosis</b> |   |
| 1                                                                         | [review focused search]       | 0 |
| 2                                                                         | [concept: SRs]                | 0 |



|    |                                                                         |         |
|----|-------------------------------------------------------------------------|---------|
| 3  | (systematic adj4 review).ti.                                            | 217307  |
| 4  | systematic review.pt.                                                   | 223463  |
| 5  | Cochrane Database of Systematic Reviews.jn. and review.pt.              | 14296   |
| 6  | [approach c: based on Lee 2012]                                         | 0       |
| 7  | medline.tw. or systematic review.ti. or meta-analysis.pt. or pubmed.tw. | 451208  |
| 8  | [from our previous searches]                                            | 0       |
| 9  | (pooled analysis or pooled analyses).mp.                                | 14123   |
| 10 | (metaanalysis or meta-analysis).af.                                     | 270617  |
| 11 | 3 OR 4 OR 5 OR 7 OR 9 OR 10                                             | 525827  |
| 12 | (correlat* OR associat* OR regress* OR validat*).mp.                    | 8916597 |
| 13 | [disease-specific search term]                                          | 0       |
| 14 | pulmonary tuberculosis.mp.                                              | 35924   |
| 15 | [surrogate specific search term]                                        | 0       |
| 16 | (culture adj4 negative).mp.                                             | 11671   |
| 17 | 11 AND 12 AND 14 AND 16                                                 | 3       |

|                                                                           |                                                                             |        |
|---------------------------------------------------------------------------|-----------------------------------------------------------------------------|--------|
| <b>Ovid<br/>MEDLINE(R)<br/>ALL &lt;1946<br/>to March 19,<br/>2023&gt;</b> | <b>Secondary hyperparathyroidism associated with chronic kidney disease</b> |        |
| 1                                                                         | [review focused search]                                                     | 0      |
| 2                                                                         | [concept: SRs]                                                              | 0      |
| 3                                                                         | (systematic adj4 review).ti.                                                | 217307 |
| 4                                                                         | systematic review.pt.                                                       | 223463 |

|    |                                                                                |         |
|----|--------------------------------------------------------------------------------|---------|
| 5  | Cochrane Database of Systematic Reviews.jn. and review.pt.                     | 14296   |
| 6  | [approach c: based on Lee 2012]                                                | 0       |
| 7  | medline.tw. or systematic review.ti. or meta-analysis.pt. or pubmed.tw.        | 451208  |
| 8  | [from our previous searches]                                                   | 0       |
| 9  | (pooled analysis or pooled analyses).mp.                                       | 14123   |
| 10 | (metaanalysis or meta-analysis).af.                                            | 270617  |
| 11 | 3 OR 4 OR 5 OR 7 OR 9 OR 10                                                    | 525827  |
| 12 | (correlat* OR associat* OR regress* OR validat*).mp.                           | 8916597 |
| 13 | [disease-specific search term]                                                 | 0       |
| 14 | ((hyperparathyroidism or parathyroid) AND (chronic kidney disease OR CKD)).mp. | 5224    |
| 15 | [surrogate specific search term]                                               | 0       |
| 16 | (iPTH or parathyroid).mp.                                                      | 66411   |
| 17 | 11 AND 12 AND 14 AND 16                                                        | 51      |

|                                                                           |                                                            |        |
|---------------------------------------------------------------------------|------------------------------------------------------------|--------|
| <b>Ovid<br/>MEDLINE(R)<br/>ALL &lt;1946<br/>to March 19,<br/>2023&gt;</b> | <b>Systemic sclerosis-interstitial lung disease</b>        |        |
| 1                                                                         | [review focused search]                                    | 0      |
| 2                                                                         | [concept: SRs]                                             | 0      |
| 3                                                                         | (systematic adj4 review).ti.                               | 217307 |
| 4                                                                         | systematic review.pt.                                      | 223463 |
| 5                                                                         | Cochrane Database of Systematic Reviews.jn. and review.pt. | 14296  |
| 6                                                                         | [approach c: based on Lee 2012]                            | 0      |

|    |                                                                                                                              |         |
|----|------------------------------------------------------------------------------------------------------------------------------|---------|
| 7  | medline.tw. or systematic review.ti. or meta-analysis.pt. or pubmed.tw.                                                      | 451208  |
| 8  | [from our previous searches]                                                                                                 | 0       |
| 9  | (pooled analysis or pooled analyses).mp.                                                                                     | 14123   |
| 10 | (metaanalysis or meta-analysis).af.                                                                                          | 270617  |
| 11 | 3 OR 4 OR 5 OR 7 OR 9 OR 10                                                                                                  | 525827  |
| 12 | (correlat* OR associat* OR regress* OR validat*).mp.                                                                         | 8916597 |
| 13 | [disease-specific search term]                                                                                               | 0       |
| 14 | (systemic sclerosis interstitial lung disease OR systemic sclerosis-interstitial lung disease OR systemic sclerosis ILD).mp. | 66      |
| 15 | [surrogate specific search term]                                                                                             | 0       |
| 16 | (FVC or forced vital capacity).mp.                                                                                           | 22234   |
| 17 | 11 AND 12 AND 14 AND 16                                                                                                      | 4       |

|                                                                           |                                                                         |        |
|---------------------------------------------------------------------------|-------------------------------------------------------------------------|--------|
| <b>Ovid<br/>MEDLINE(R)<br/>ALL &lt;1946<br/>to March 19,<br/>2023&gt;</b> | <b>Tobacco dependence</b>                                               |        |
| 1                                                                         | [review focused search]                                                 | 0      |
| 2                                                                         | [concept: SRs]                                                          | 0      |
| 3                                                                         | (systematic adj4 review).ti.                                            | 217307 |
| 4                                                                         | systematic review.pt.                                                   | 223463 |
| 5                                                                         | Cochrane Database of Systematic Reviews.jn. and review.pt.              | 14296  |
| 6                                                                         | [approach c: based on Lee 2012]                                         | 0      |
| 7                                                                         | medline.tw. or systematic review.ti. or meta-analysis.pt. or pubmed.tw. | 451208 |

|    |                                                                          |         |
|----|--------------------------------------------------------------------------|---------|
| 8  | [from our previous searches]                                             | 0       |
| 9  | (pooled analysis or pooled analyses).mp.                                 | 14123   |
| 10 | (metaanalysis or meta-analysis).af.                                      | 270617  |
| 11 | 3 OR 4 OR 5 OR 7 OR 9 OR 10                                              | 525827  |
| 12 | (correlat* OR associat* OR regress* OR validat*).mp.                     | 8916597 |
| 13 | [disease-specific search term]                                           | 0       |
| 14 | (tobacco dependence or nicotine dependence).mp. OR Tobacco Use Disorder/ | 16195   |
| 15 | [surrogate specific search term]                                         | 0       |
| 16 | ((exhaled adj4 carbon) or carbon monoxide OR CO).mp.                     | 733809  |
| 17 | 11 AND 12 AND 14 AND 16                                                  | 20      |

|                                                           |                                                                         |        |
|-----------------------------------------------------------|-------------------------------------------------------------------------|--------|
| <b>Ovid MEDLINE(R) ALL &lt;1946 to March 19, 2023&gt;</b> | <b>Type 2 diabetes mellitus</b>                                         |        |
| 1                                                         | [review focused search]                                                 | 0      |
| 2                                                         | [concept: SRs]                                                          | 0      |
| 3                                                         | (systematic adj4 review).ti.                                            | 217307 |
| 4                                                         | systematic review.pt.                                                   | 223463 |
| 5                                                         | Cochrane Database of Systematic Reviews.jn. and review.pt.              | 14296  |
| 6                                                         | [approach c: based on Lee 2012]                                         | 0      |
| 7                                                         | medline.tw. or systematic review.ti. or meta-analysis.pt. or pubmed.tw. | 451208 |
| 8                                                         | [from our previous searches]                                            | 0      |
| 9                                                         | (pooled analysis or pooled analyses).mp.                                | 14123  |

|    |                                                      |         |
|----|------------------------------------------------------|---------|
| 10 | (metaanalysis or meta-analysis).af.                  | 270617  |
| 11 | 3 OR 4 OR 5 OR 7 OR 9 OR 10                          | 525827  |
| 12 | (correlat* OR associat* OR regress* OR validat*).mp. | 8916597 |
| 13 | [disease-specific search term]                       | 0       |
| 14 | (type 2 diabetes or type II diabetes or T2D*).mp.    | 229769  |
| 15 | [surrogate specific search term]                     | 0       |
| 16 | (HbA1c or hemoglobin or gly* hemoglobin or A1c).mp.  | 200674  |
| 17 | 11 AND 12 AND 14 AND 16                              | 1334    |

| <b>eTable 1a. Surrogate marker-clinical outcome pairs from meta-analyses of clinical trials with correlation coefficients, coefficients of determination, or results from meta-regression analyses</b> |                         |                         |                                                                                     |                       |                                                                               |                                                                                                             |                                               |                                                          |                                                                               |                                               |
|--------------------------------------------------------------------------------------------------------------------------------------------------------------------------------------------------------|-------------------------|-------------------------|-------------------------------------------------------------------------------------|-----------------------|-------------------------------------------------------------------------------|-------------------------------------------------------------------------------------------------------------|-----------------------------------------------|----------------------------------------------------------|-------------------------------------------------------------------------------|-----------------------------------------------|
| <b>Characteristics</b>                                                                                                                                                                                 |                         |                         | <b>Meta-analyses with correlation coefficients or coefficients of determination</b> |                       |                                                                               |                                                                                                             |                                               | <b>Meta-analyses with regression-based analyses only</b> |                                                                               |                                               |
| <b>Chronic disease</b>                                                                                                                                                                                 | <b>Surrogate Marker</b> | <b>Clinical Outcome</b> | <b>Meta-analyses identified, No.</b>                                                | <b>Total, No. (%)</b> | <b>Meta-analyses providing statistically significant evidence (P&lt;0.05)</b> | <b>Meta-analyses providing statistically significant and high-strength evidence (r&gt;0.85)<sup>a</sup></b> | <b>Meta-analyses providing mixed evidence</b> | <b>Total, No. (%)</b>                                    | <b>Meta-analyses providing statistically significant evidence (P&lt;0.05)</b> | <b>Meta-analyses providing mixed evidence</b> |
| Overall                                                                                                                                                                                                | NA                      | NA                      | 200                                                                                 | 81                    | 51                                                                            | 10                                                                                                          | 4                                             | 119                                                      | 64                                                                            | 15                                            |
| <b>Surrogate markers appropriate for accelerated approval</b>                                                                                                                                          |                         |                         |                                                                                     |                       |                                                                               |                                                                                                             |                                               |                                                          |                                                                               |                                               |
| Alzheimer's disease                                                                                                                                                                                    | Amyloid beta plaque     | CDR-SB                  | 3                                                                                   | 1                     | 0                                                                             | 0                                                                                                           | 0                                             | 2                                                        | 1                                                                             | 0                                             |
|                                                                                                                                                                                                        |                         | ADAS-Cog                | 2                                                                                   | 1                     | 1                                                                             | 0                                                                                                           | 0                                             | 1                                                        | 1                                                                             | 0                                             |
|                                                                                                                                                                                                        |                         | MMSE                    | 2                                                                                   | 0                     | 0                                                                             | 0                                                                                                           | 0                                             | 2                                                        | 1                                                                             | 0                                             |

|                                                               |             |                                                                                            |   |   |   |   |   |   |   |   |
|---------------------------------------------------------------|-------------|--------------------------------------------------------------------------------------------|---|---|---|---|---|---|---|---|
| Primary glomerular disease                                    | Proteinuria | Doubling of serum creatinine, ESRD, or death                                               | 1 | 1 | 1 | 1 | 0 | 0 | 0 | 0 |
| <b>Surrogate markers appropriate for traditional approval</b> |             |                                                                                            |   |   |   |   |   |   |   |   |
| Chronic kidney disease                                        | eGFR        | Doubling of serum creatinine, GFR, 15 mL/min per 1.73 m <sup>2</sup> , treated ESRD        | 2 | 1 | 1 | 1 | 0 | 1 | 1 | 0 |
|                                                               |             | Doubling of serum creatinine, GFR, 15 mL/min per 1.73 m <sup>2</sup> , treated ESRD, death | 1 | 0 | 0 | 0 | 0 | 1 | 1 | 0 |
|                                                               |             | Treated ESRD                                                                               | 1 | 0 | 0 | 0 | 0 | 1 | 1 | 0 |
| COPD                                                          | Trough FEV1 | Moderate-severe exacerbation rate                                                          | 3 | 3 | 3 | 0 | 0 | 0 | 0 | 0 |
|                                                               |             | Rescue medication use                                                                      | 2 | 2 | 2 | 0 | 0 | 0 | 0 | 0 |
|                                                               |             | SGRQ                                                                                       | 4 | 4 | 3 | 0 | 1 | 0 | 0 | 0 |
|                                                               |             | Time to first occurrence of a moderate-severe exacerbation                                 | 1 | 1 | 1 | 1 | 0 | 0 | 0 | 0 |
|                                                               |             | TDI                                                                                        | 4 | 4 | 4 | 0 | 0 | 0 | 0 | 0 |
|                                                               |             | Mild, moderate, or severe exacerbation rate                                                | 1 | 1 | 1 | 0 | 0 | 0 | 0 | 0 |
|                                                               |             | Time to first exacerbation                                                                 | 1 | 1 | 1 | 0 | 0 | 0 | 0 | 0 |
|                                                               |             | At least one exacerbation                                                                  | 1 | 1 | 1 | 0 | 0 | 0 | 0 | 0 |
|                                                               |             | Exacerbations per year                                                                     | 2 | 1 | 1 | 0 | 0 | 1 | 0 | 0 |
|                                                               |             | Time to first exacerbation, number of patients with at least one exacerbation,             | 1 | 1 | 1 | 0 | 0 | 0 | 0 | 0 |

|                      |                                     |                                                                                                 |   |   |   |   |   |   |                                                         |   |
|----------------------|-------------------------------------|-------------------------------------------------------------------------------------------------|---|---|---|---|---|---|---------------------------------------------------------|---|
|                      |                                     | or exacerbations per year                                                                       |   |   |   |   |   |   |                                                         |   |
|                      |                                     | Severe exacerbations per year                                                                   | 1 | 1 | 0 | 0 | 1 | 0 | 0                                                       | 0 |
| Gout                 | Serum uric acid                     | Gout flair                                                                                      | 1 | 1 | 0 | 0 | 0 | 0 | 0                                                       | 0 |
|                      |                                     | HAQ-DI                                                                                          | 1 | 0 | 0 | 0 | 0 | 1 | 1, but wrong direction so classified as not significant | 0 |
|                      |                                     | SDS                                                                                             | 1 | 0 | 0 | 0 | 0 | 1 | 1, but wrong direction so classified as not significant | 0 |
|                      |                                     | SF-36 MCS                                                                                       | 1 | 0 | 0 | 0 | 0 | 1 | 1, but wrong direction so classified as not significant | 0 |
|                      |                                     | PGA                                                                                             | 1 | 0 | 0 | 0 | 0 | 1 | 1, but wrong direction so classified as not significant | 0 |
|                      |                                     | Pain in the last week                                                                           | 1 | 0 | 0 | 0 | 0 | 1 | 1, but wrong direction so classified as not significant | 0 |
|                      |                                     | SF-36 PCS                                                                                       | 1 | 0 | 0 | 0 | 0 | 1 | 1, but wrong direction so classified as not significant | 0 |
|                      |                                     |                                                                                                 |   |   |   |   |   |   |                                                         |   |
| HIV                  | HIV-1 RNA viral load <50 copies/mL  | Progression to AIDS or death at 48 weeks (findings largely consistent at 24 weeks and 96 weeks) | 1 | 1 | 0 | 0 | 0 | 0 | 0                                                       | 0 |
|                      | HIV-1 RNA viral load <200 copies/mL |                                                                                                 | 1 | 1 | 0 | 0 | 1 | 0 | 0                                                       | 0 |
|                      | HIV-1 RNA viral load <400 copies/mL |                                                                                                 | 1 | 1 | 0 | 0 | 0 | 0 | 0                                                       | 0 |
|                      | Mean HIV-1 RNA level                | Progression to AIDS or death over treatment                                                     | 1 | 0 | 0 | 0 | 0 | 1 | 1                                                       | 0 |
| Hypercholesterolemia | LDL-C                               | Major vascular events, as                                                                       | 4 | 1 | 1 | 1 | 0 | 3 | 3                                                       | 0 |

|                   |                         |                                                            |   |   |   |   |   |   |   |   |
|-------------------|-------------------------|------------------------------------------------------------|---|---|---|---|---|---|---|---|
|                   |                         | defined by each meta-analysis                              |   |   |   |   |   |   |   |   |
|                   |                         | MACE, Major CV events                                      | 2 | 0 | 0 | 0 | 0 | 2 | 1 | 1 |
|                   |                         | Non-fatal MI or cardiac mortality                          | 1 | 1 | 1 | 0 | 0 | 0 | 0 | 0 |
|                   |                         | Major coronary events, as defined by each meta-analysis    | 3 | 1 | 1 | 1 | 0 | 2 | 2 | 0 |
|                   |                         | CHD mortality and non-fatal MI                             | 1 | 1 | 1 | 0 | 0 | 0 | 0 | 0 |
|                   |                         | All-cause mortality                                        | 3 | 2 | 2 | 0 | 1 | 1 | 1 | 0 |
|                   |                         | CHD mortality                                              | 2 | 1 | 1 | 0 | 0 | 1 | 1 | 0 |
|                   |                         | Vascular mortality                                         | 2 | 1 | 1 | 1 | 0 | 1 | 1 | 0 |
|                   |                         | Cancer                                                     | 1 | 0 | 0 | 0 | 0 | 1 | 0 | 0 |
|                   |                         | Fatal or non-fatal stroke                                  | 4 | 1 | 1 | 0 | 0 | 3 | 3 | 0 |
|                   |                         | Non-CV mortality                                           | 1 | 1 | 1 | 0 | 0 | 0 | 0 | 0 |
|                   |                         | Non-vascular mortality                                     | 1 | 0 | 0 | 0 | 0 | 1 | 0 | 0 |
|                   |                         | Coronary revascularization                                 | 1 | 0 | 0 | 0 | 0 | 1 | 1 | 0 |
| Hyperphosphatemia | Serum phosphorus        | All-cause mortality                                        | 1 | 1 | 0 | 0 | 0 | 0 | 0 | 0 |
|                   |                         | CV mortality                                               | 1 | 1 | 0 | 0 | 0 | 0 | 0 | 0 |
| Hypertension      | Systolic blood pressure | MACE and Major CV events, as defined by each meta-analysis | 3 | 0 | 0 | 0 | 0 | 3 | 2 | 1 |
|                   |                         | Fatal or non-fatal stroke, 'stroke', 5-year risk of stroke | 6 | 1 | 1 | 0 | 0 | 5 | 5 | 0 |
|                   |                         | Disabling or fatal stroke                                  | 1 | 0 | 0 | 0 | 0 | 1 | 0 | 0 |
|                   |                         | Ischemic Heart Disease                                     | 1 | 0 | 0 | 0 | 0 | 1 | 1 | 0 |
|                   |                         | HF or HF causing                                           | 4 | 0 | 0 | 0 | 0 | 4 | 3 | 1 |



|  |                                       |                                                    |   |   |   |   |   |   |   |   |
|--|---------------------------------------|----------------------------------------------------|---|---|---|---|---|---|---|---|
|  |                                       | hospitalization or death, 5-year risk of HF        |   |   |   |   |   |   |   |   |
|  |                                       | CV mortality; 5-years risk of CV mortality         | 5 | 1 | 0 | 0 | 0 | 4 | 1 | 3 |
|  |                                       | All-cause mortality                                | 6 | 1 | 0 | 0 | 0 | 5 | 2 | 2 |
|  |                                       | Recurrent stroke                                   | 1 | 0 | 0 | 0 | 0 | 1 | 1 | 0 |
|  |                                       | MI                                                 | 2 | 0 | 0 | 0 | 0 | 2 | 1 | 0 |
|  |                                       | CHD; 5-year risk of CHD                            | 3 | 0 | 0 | 0 | 0 | 3 | 0 | 2 |
|  |                                       | Kidney failure                                     | 1 | 0 | 0 | 0 | 0 | 1 | 0 | 0 |
|  |                                       | MI, stroke, CHF, and CV mortality                  | 1 | 0 | 0 | 0 | 0 | 1 | 1 | 0 |
|  |                                       | 5-year risk of CVD                                 | 1 | 0 | 0 | 0 | 0 | 1 | 0 | 1 |
|  |                                       | CHD and stroke                                     | 1 | 0 | 0 | 0 | 0 | 1 | 1 | 0 |
|  | Diastolic blood pressure              | All-cause mortality                                | 2 | 1 | 0 | 0 | 0 | 1 | 1 | 0 |
|  |                                       | CV mortality                                       | 1 | 1 | 0 | 0 | 0 | 0 | 0 | 0 |
|  |                                       | MI                                                 | 1 | 0 | 0 | 0 | 0 | 1 | 0 | 0 |
|  |                                       | Recurrent stroke                                   | 1 | 0 | 0 | 0 | 0 | 1 | 1 | 0 |
|  |                                       | Fatal and non-fatal stroke; 'stroke'               | 2 | 1 | 1 | 0 | 0 | 1 | 1 | 0 |
|  |                                       | MI, stroke, CHF, and CV mortality                  | 1 | 0 | 0 | 0 | 0 | 1 | 1 | 0 |
|  | Systolic and diastolic blood pressure | Fatal and non-fatal stroke                         | 2 | 0 | 0 | 0 | 0 | 2 | 2 | 0 |
|  |                                       | CHD                                                | 2 | 0 | 0 | 0 | 0 | 2 | 2 | 0 |
|  |                                       | HF hospitalization                                 | 1 | 0 | 0 | 0 | 0 | 1 | 1 | 0 |
|  |                                       | Fatal and non-fatal stroke and CHD                 | 1 | 0 | 0 | 0 | 0 | 1 | 1 | 0 |
|  |                                       | Fata and non-fatal stroke, CHD, HF hospitalization | 1 | 0 | 0 | 0 | 0 | 1 | 1 | 0 |
|  |                                       | CV mortality                                       | 1 | 0 | 0 | 0 | 0 | 1 | 1 | 0 |
|  |                                       | All-cause mortality                                | 1 | 0 | 0 | 0 | 0 | 1 | 1 | 0 |

|                               |                                      |                                                           |   |   |   |   |   |   |   |   |
|-------------------------------|--------------------------------------|-----------------------------------------------------------|---|---|---|---|---|---|---|---|
| Hypertriglyceridemia          | Serum triglycerides                  | Major vascular events, as defined by each component study | 2 | 0 | 0 | 0 | 0 | 2 | 0 | 2 |
|                               |                                      | Stroke                                                    | 1 | 0 | 0 | 0 | 0 | 1 | 0 | 0 |
| Osteoporosis                  | Hip BMD                              | Vertebral fractures                                       | 3 | 2 | 2 | 1 | 0 | 1 | 1 | 0 |
|                               |                                      | Hip fractures                                             | 2 | 2 | 2 | 0 | 0 | 0 | 0 | 0 |
|                               |                                      | Non-vertebral fractures                                   | 3 | 2 | 1 | 0 | 0 | 1 | 1 | 0 |
|                               | Femoral neck BMD                     | Vertebral fractures                                       | 2 | 2 | 2 | 0 | 0 | 0 | 0 | 0 |
|                               |                                      | Hip fractures                                             | 2 | 2 | 1 | 0 | 0 | 0 | 0 | 0 |
|                               |                                      | Non-vertebral fractures                                   | 3 | 2 | 1 | 0 | 0 | 1 | 0 | 0 |
|                               | Spine BMD                            | Vertebral fractures                                       | 4 | 2 | 2 | 0 | 0 | 2 | 2 | 0 |
|                               |                                      | Hip fractures                                             | 2 | 2 | 1 | 0 | 0 | 0 | 0 | 0 |
|                               |                                      | Non-vertebral fractures                                   | 4 | 2 | 1 | 0 | 0 | 2 | 1 | 0 |
| Idiopathic pulmonary fibrosis | FVC                                  | Mortality                                                 | 1 | 0 | 0 | 0 | 0 | 1 | 1 | 0 |
|                               |                                      | Disease progression                                       | 1 | 0 | 0 | 0 | 0 | 1 | 1 | 0 |
| Secondary hyperparathyroidism | Target serum parathyroid hormone     | All-cause mortality                                       | 1 | 1 | 0 | 0 | 0 | 0 | 0 | 0 |
|                               |                                      | CV mortality                                              | 1 | 1 | 0 | 0 | 0 | 0 | 0 | 0 |
|                               | Continuous serum parathyroid hormone | All-cause mortality                                       | 1 | 1 | 1 | 0 | 0 | 0 | 0 | 0 |
|                               |                                      | CV mortality                                              | 1 | 1 | 0 | 0 | 0 | 0 | 0 | 0 |
| T2DM                          | HbA1c                                | All-cause mortality                                       | 7 | 3 | 0 | 0 | 0 | 4 | 1 | 0 |
|                               |                                      | MACE, as defined individual by each study                 | 4 | 2 | 2 | 2 | 0 | 2 | 1 | 0 |
|                               |                                      | MI                                                        | 3 | 1 | 0 | 0 | 0 | 2 | 1 | 0 |
|                               |                                      | Non-fatal MI                                              | 1 | 1 | 0 | 0 | 0 | 0 | 0 | 0 |
|                               |                                      | Stroke (unspecified)                                      | 2 | 1 | 1 | 0 | 0 | 1 | 1 | 0 |
|                               |                                      | Non-fatal stroke                                          | 1 | 1 | 1 | 1 | 0 | 0 | 0 | 0 |
|                               |                                      | Fatal and non-fatal stroke                                | 2 | 0 | 0 | 0 | 0 | 2 | 0 | 0 |

|                                                              |   |   |   |   |   |   |   |   |
|--------------------------------------------------------------|---|---|---|---|---|---|---|---|
| Hospitalization for HF                                       | 3 | 1 | 0 | 0 | 0 | 2 | 0 | 0 |
| HF                                                           | 2 | 1 | 0 | 0 | 0 | 1 | 0 | 0 |
| Kidney injury, as defined by component study                 | 1 | 1 | 0 | 0 | 0 | 0 | 0 | 0 |
| CV mortality                                                 | 4 | 1 | 0 | 0 | 0 | 3 | 0 | 0 |
| Composite kidney outcome                                     | 1 | 0 | 0 | 0 | 0 | 1 | 0 | 0 |
| CHD                                                          | 1 | 0 | 0 | 0 | 0 | 1 | 0 | 1 |
| CHD and fatal or non-fatal stroke                            | 1 | 0 | 0 | 0 | 0 | 1 | 1 | 0 |
| CHD and fatal or non-fatal stroke and hospitalization for HF | 1 | 0 | 0 | 0 | 0 | 1 | 0 | 1 |
| Hypoglycemia                                                 | 1 | 0 | 0 | 0 | 0 | 1 | 0 | 0 |
| Severe hypoglycemia                                          | 2 | 0 | 0 | 0 | 0 | 2 | 0 | 0 |
| Retinopathy                                                  | 1 | 0 | 0 | 0 | 0 | 1 | 0 | 0 |
| Microalbuminuria                                             | 1 | 0 | 0 | 0 | 0 | 1 | 0 | 0 |
| Neuropathy                                                   | 1 | 0 | 0 | 0 | 0 | 1 | 0 | 0 |
| Peripheral vascular events                                   | 1 | 0 | 0 | 0 | 0 | 1 | 0 | 0 |

<sup>a</sup> Classified as providing high-strength evidence using criteria proposed by the Institute for Quality and Efficiency in Health Care (IQWiG) ( $r \geq 0.85$  or  $R^2 \geq 0.72$ ).<sup>64</sup>  
 ADAS-Cog, Alzheimer's Disease Assessment Scale – Cognitive Subscale; AIDS, acquired immunodeficiency syndrome; BMD, bone mineral density; CDR-SB; Clinical Dementia Rating – Sum of Boxes; CHD, coronary heart disease; CHF, coronary heart failure; CV, cardiovascular; ESRD, end-stage kidney disease; FEV1, forced expiratory volume in 1 second; GFR, glomerular filtration rate; HAQ-DI, Health Assessment Questionnaire Disability Index; HbA1c, hemoglobin A1c; HF, heart failure; HIV, human immunodeficiency virus; LDL-C, low-density lipoprotein; MACE, major adverse cardiovascular event; MI, myocardial infarction; mL, milliliter; MMSE, Mini-Mental State Examination; PGA, Patient Global Assessment; r, correlation coefficient; SDS, Sheehan Disability Scale; SF-36 MCS, Short form 36 mental component; SGRQ, St. George's Respiratory Questionnaire; TDI, Townsend Deprivation Index;

| <b>eTable 1b. Surrogate marker-clinical outcome pairs from meta-analyses of clinical trials with correlation coefficients, coefficients of determination, or results from meta-regression analyses classification for Figure 2.</b> |                         |                                                                                            |                                      |                                    |                                      |                                    |                                  |                                     |                                |
|-------------------------------------------------------------------------------------------------------------------------------------------------------------------------------------------------------------------------------------|-------------------------|--------------------------------------------------------------------------------------------|--------------------------------------|------------------------------------|--------------------------------------|------------------------------------|----------------------------------|-------------------------------------|--------------------------------|
| <b>Chronic disease</b>                                                                                                                                                                                                              | <b>Surrogate Marker</b> | <b>Clinical Outcome</b>                                                                    | <b>Meta-analyses identified, No.</b> | <b>Strong evidence<sup>a</sup></b> | <b>Moderate evidence<sup>b</sup></b> | <b>Modest evidence<sup>c</sup></b> | <b>Weak evidence<sup>d</sup></b> | <b>Limited evidence<sup>e</sup></b> | <b>No evidence<sup>f</sup></b> |
| <b>Surrogate markers appropriate for accelerated approval</b>                                                                                                                                                                       |                         |                                                                                            |                                      |                                    |                                      |                                    |                                  |                                     |                                |
| Alzheimer's disease                                                                                                                                                                                                                 | Amyloid beta plaque     | CDR-SB                                                                                     | 3                                    | 0                                  | 0                                    | 0                                  | 0                                | 1                                   | 0                              |
|                                                                                                                                                                                                                                     |                         | ADAS-Cog                                                                                   | 2                                    | 0                                  | 0                                    | 0                                  | 1                                | 0                                   | 0                              |
|                                                                                                                                                                                                                                     |                         | MMSE                                                                                       | 2                                    | 0                                  | 0                                    | 0                                  | 0                                | 1                                   | 0                              |
| Primary glomerular disease                                                                                                                                                                                                          | Proteinuria             | Doubling of serum creatinine, ESRD, or death                                               | 1                                    | 1                                  | 0                                    | 0                                  | 0                                | 0                                   | 0                              |
| <b>Surrogate markers appropriate for traditional approval</b>                                                                                                                                                                       |                         |                                                                                            |                                      |                                    |                                      |                                    |                                  |                                     |                                |
| Chronic kidney disease                                                                                                                                                                                                              | eGFR                    | Doubling of serum creatinine, GFR, 15 mL/min per 1.73 m <sup>2</sup> , treated ESRD        | 2                                    | 0                                  | 0                                    | 1                                  | 0                                | 0                                   | 0                              |
|                                                                                                                                                                                                                                     |                         | Doubling of serum creatinine, GFR, 15 mL/min per 1.73 m <sup>2</sup> , treated ESRD, death | 1                                    | 0                                  | 0                                    | 0                                  | 1                                | 0                                   | 0                              |
|                                                                                                                                                                                                                                     |                         | Treated ESRD                                                                               | 1                                    | 0                                  | 0                                    | 0                                  | 1                                | 0                                   | 0                              |
| COPD                                                                                                                                                                                                                                | Trough FEV1             | Moderate-severe exacerbation rate                                                          | 3                                    | 0                                  | 0                                    | 0                                  | 0                                | 0                                   | 1                              |
|                                                                                                                                                                                                                                     |                         | Rescue medication use                                                                      | 2                                    | 0                                  | 0                                    | 0                                  | 0                                | 0                                   | 1                              |
|                                                                                                                                                                                                                                     |                         | SGRQ                                                                                       | 4                                    | 0                                  | 0                                    | 0                                  | 0                                | 1                                   | 0                              |
|                                                                                                                                                                                                                                     |                         | Time to first occurrence of a                                                              | 1                                    | 1                                  | 0                                    | 0                                  | 0                                | 0                                   | 0                              |

|                      |                                     |                                                                                                          |   |   |   |   |   |   |   |
|----------------------|-------------------------------------|----------------------------------------------------------------------------------------------------------|---|---|---|---|---|---|---|
|                      |                                     | moderate-severe exacerbation                                                                             |   |   |   |   |   |   |   |
|                      |                                     | TDI                                                                                                      | 4 | 0 | 0 | 0 | 1 | 0 | 0 |
|                      |                                     | Mild, moderate, or severe exacerbation                                                                   | 1 | 0 | 0 | 0 | 1 | 0 | 0 |
|                      |                                     | Time to first exacerbation                                                                               | 1 | 0 | 0 | 0 | 1 | 0 | 0 |
|                      |                                     | At least one exacerbation                                                                                | 1 | 0 | 0 | 0 | 1 | 0 | 0 |
|                      |                                     | Exacerbations per year                                                                                   | 2 | 0 | 0 | 0 | 0 | 1 | 0 |
|                      |                                     | Time to first exacerbation, number of patients with at least one exacerbation, or exacerbations per year | 1 | 0 | 0 | 0 | 1 | 0 | 0 |
|                      |                                     | Severe exacerbations per year                                                                            | 1 | 0 | 0 | 0 | 0 | 1 | 0 |
| Gout                 | Serum uric acid                     | Gout flair                                                                                               | 1 | 0 | 0 | 0 | 0 | 0 | 1 |
|                      |                                     | HAQ-DI                                                                                                   | 1 | 0 | 0 | 0 | 0 | 0 | 1 |
|                      |                                     | SDS                                                                                                      | 1 | 0 | 0 | 0 | 0 | 0 | 1 |
|                      |                                     | SF-36 MCS                                                                                                | 1 | 0 | 0 | 0 | 0 | 0 | 1 |
|                      |                                     | PGA                                                                                                      | 1 | 0 | 0 | 0 | 0 | 0 | 1 |
|                      |                                     | Pain in the last week                                                                                    | 1 | 0 | 0 | 0 | 0 | 0 | 1 |
|                      |                                     | SF-36 PCS                                                                                                | 1 | 0 | 0 | 0 | 0 | 0 | 1 |
| HIV                  | HIV-1 RNA viral load <50 copies/mL  | Progression to AIDS or death at 48 weeks (findings largely consistent at 24 weeks and 96 weeks)          | 1 | 0 | 0 | 0 | 0 | 0 | 1 |
|                      | HIV-1 RNA viral load <200 copies/mL |                                                                                                          | 1 | 0 | 0 | 0 | 0 | 1 | 0 |
|                      | HIV-1 RNA viral load <400 copies/mL |                                                                                                          | 1 | 0 | 0 | 0 | 0 | 0 | 1 |
|                      | Mean HIV-1 RNA level                | Progression to AIDS or death over treatment                                                              | 1 | 0 | 0 | 0 | 0 | 1 | 0 |
| Hypercholesterolemia | LDL-C                               | Major vascular events, as defined by each meta-analysis                                                  | 4 | 0 | 0 | 1 | 0 | 0 | 0 |
|                      |                                     | MACE<br>Major CV events                                                                                  | 2 | 0 | 0 | 0 | 0 | 1 | 0 |

|                   |                         |                                                              |   |   |   |   |   |   |   |
|-------------------|-------------------------|--------------------------------------------------------------|---|---|---|---|---|---|---|
|                   |                         | Non-fatal MI or cardiac mortality                            | 1 | 0 | 0 | 0 | 1 | 0 | 0 |
|                   |                         | Major coronary events, as defined by each meta-analysis      | 3 | 0 | 0 | 1 | 0 | 0 | 0 |
|                   |                         | CHD mortality and non-fatal MI                               | 1 | 0 | 0 | 0 | 1 | 0 | 0 |
|                   |                         | All-cause mortality                                          | 3 | 0 | 0 | 0 | 1 | 0 | 0 |
|                   |                         | CHD mortality                                                | 2 | 0 | 0 | 0 | 1 | 0 | 0 |
|                   |                         | Vascular mortality                                           | 2 | 0 | 0 | 1 | 0 | 0 | 0 |
|                   |                         | Cancer                                                       | 1 | 0 | 0 | 0 | 0 | 0 | 1 |
|                   |                         | Fatal or non-fatal stroke                                    | 4 | 0 | 0 | 0 | 1 | 0 | 0 |
|                   |                         | Non-CV mortality                                             | 1 | 0 | 0 | 0 | 1 | 0 | 0 |
|                   |                         | Non-vascular mortality                                       | 1 | 0 | 0 | 0 | 0 | 0 | 1 |
|                   |                         | Coronary revascularization                                   | 1 | 0 | 0 | 0 | 1 | 0 | 0 |
| Hyperphosphatemia | Serum phosphorus        | All-cause mortality                                          | 1 | 0 | 0 | 0 | 0 | 0 | 1 |
|                   |                         | CV mortality                                                 | 1 | 0 | 0 | 0 | 0 | 0 | 1 |
| Hypertension      | Systolic blood pressure | MACE and Major CV events, as defined by each meta-analysis   | 3 | 0 | 0 | 0 | 0 | 1 | 0 |
|                   |                         | Fatal or non-fatal stroke, 'stroke', 5-year risk of stroke   | 6 | 0 | 0 | 0 | 1 | 0 | 0 |
|                   |                         | Disabling or fatal stroke                                    | 1 | 0 | 0 | 0 | 0 | 0 | 1 |
|                   |                         | Ischemic Heart Disease                                       | 1 | 0 | 0 | 0 | 1 | 0 | 0 |
|                   |                         | HF or HF causing hospitalization or death, 5-year risk of HF | 4 | 0 | 0 | 0 | 0 | 1 | 0 |
|                   |                         | CV mortality; 5-years risk of CV mortality                   | 5 | 0 | 0 | 0 | 0 | 1 | 0 |
|                   |                         | All-cause mortality                                          | 6 | 0 | 0 | 0 | 0 | 1 | 0 |
|                   |                         | Recurrent stroke                                             | 1 | 0 | 0 | 0 | 1 | 0 | 0 |
|                   |                         | MI                                                           | 2 | 0 | 0 | 0 | 0 | 1 | 0 |
|                   |                         | CHD; 5-year risk of CHD                                      | 3 | 0 | 0 | 0 | 0 | 1 | 0 |
|                   |                         | Kidney failure                                               | 1 | 0 | 0 | 0 | 0 | 0 | 1 |
|                   |                         | MI, stroke, CHF, and CV mortality                            | 1 | 0 | 0 | 0 | 1 | 0 | 0 |
|                   |                         | 5-year risk of CVD                                           | 1 | 0 | 0 | 0 | 0 | 1 | 0 |
|                   |                         | CHD and stroke                                               | 1 | 0 | 0 | 0 | 1 | 0 | 0 |

|                               |                                       |                                                           |   |   |   |   |   |   |   |
|-------------------------------|---------------------------------------|-----------------------------------------------------------|---|---|---|---|---|---|---|
|                               | Diastolic blood pressure              | All-cause mortality                                       | 2 | 0 | 0 | 0 | 0 | 1 | 0 |
|                               |                                       | CV mortality                                              | 1 | 0 | 0 | 0 | 0 | 0 | 1 |
|                               |                                       | MI                                                        | 1 | 0 | 0 | 0 | 0 | 0 | 1 |
|                               |                                       | Recurrent stroke                                          | 1 | 0 | 0 | 0 | 1 | 0 | 0 |
|                               |                                       | Fatal and non-fatal stroke; 'stroke'                      | 2 | 0 | 0 | 0 | 1 | 0 | 0 |
|                               |                                       | MI, stroke, CHF, and CV mortality                         | 1 | 0 | 0 | 0 | 1 | 0 | 0 |
|                               | Systolic and diastolic blood pressure | Fatal and non-fatal stroke                                | 2 | 0 | 0 | 0 | 1 | 0 | 0 |
|                               |                                       | CHD                                                       | 2 | 0 | 0 | 0 | 1 | 0 | 0 |
|                               |                                       | HF hospitalization                                        | 1 | 0 | 0 | 0 | 1 | 0 | 0 |
|                               |                                       | Fatal and non-fatal stroke and CHD                        | 1 | 0 | 0 | 0 | 1 | 0 | 0 |
|                               |                                       | Fata and non-fatal stroke, CHD, HF hospitalization        | 1 | 0 | 0 | 0 | 1 | 0 | 0 |
|                               |                                       | CV mortality                                              | 1 | 0 | 0 | 0 | 1 | 0 | 0 |
|                               |                                       | All-cause mortality                                       | 1 | 0 | 0 | 0 | 1 | 0 | 0 |
| Hypertriglyceridemia          | Serum triglycerides                   | Major vascular events, as defined by each component study | 2 | 0 | 0 | 0 | 0 | 1 | 0 |
|                               |                                       | Stroke                                                    | 0 | 0 | 0 | 0 | 0 | 0 | 1 |
| Osteoporosis                  | Hip BMD                               | Vertebral fractures                                       | 3 | 0 | 0 | 1 | 0 | 0 | 0 |
|                               |                                       | Hip fractures                                             | 2 | 0 | 0 | 0 | 1 | 0 | 0 |
|                               |                                       | Non-vertebral fractures                                   | 3 | 0 | 0 | 0 | 0 | 1 | 0 |
|                               | Femoral neck BMD                      | Vertebral fractures                                       | 2 | 0 | 0 | 0 | 1 | 0 | 0 |
|                               |                                       | Hip fractures                                             | 2 | 0 | 0 | 0 | 0 | 1 | 0 |
|                               |                                       | Non-vertebral fractures                                   | 3 | 0 | 0 | 0 | 0 | 1 | 0 |
|                               | Spine BMD                             | Vertebral fractures                                       | 4 | 0 | 0 | 0 | 1 | 0 | 0 |
|                               |                                       | Hip fractures                                             | 2 | 0 | 0 | 0 | 0 | 1 | 0 |
|                               |                                       | Non-vertebral fractures                                   | 4 | 0 | 0 | 0 | 0 | 1 | 0 |
| Idiopathic pulmonary fibrosis | Forced vital capacity                 | Mortality                                                 | 1 | 0 | 0 | 0 | 1 | 0 | 0 |
|                               |                                       | Disease progression                                       | 1 | 0 | 0 | 0 | 1 | 0 | 0 |
| Secondary hyperparathyroidism | Target serum parathyroid hormone      | All-cause mortality                                       | 1 | 0 | 0 | 0 | 0 | 0 | 1 |
|                               |                                       | CV mortality                                              | 1 | 0 | 0 | 0 | 0 | 0 | 1 |
|                               | Continuous serum parathyroid hormone  | All-cause mortality                                       | 1 | 0 | 0 | 0 | 1 | 0 | 0 |
|                               |                                       | CV mortality                                              | 1 | 0 | 0 | 0 | 0 | 0 | 1 |
| T2DM                          | HbA1c                                 | All-cause mortality                                       | 7 | 0 | 0 | 0 | 0 | 1 | 0 |
|                               |                                       | MACE, as defined individual by each study                 | 4 | 0 | 0 | 1 | 0 | 0 | 0 |

|  |                                                              |   |   |   |   |   |   |   |
|--|--------------------------------------------------------------|---|---|---|---|---|---|---|
|  | MI                                                           | 3 | 0 | 0 | 0 | 0 | 1 | 0 |
|  | Non-fatal MI                                                 | 1 | 0 | 0 | 0 | 0 | 0 | 1 |
|  | Stroke (unspecified)                                         | 2 | 0 | 0 | 0 | 1 | 0 | 0 |
|  | Non-fatal stroke                                             | 1 | 1 | 0 | 0 | 0 | 0 | 0 |
|  | Fatal and non-fatal stroke                                   | 2 | 0 | 0 | 0 | 0 | 0 | 1 |
|  | Hospitalization for HF                                       | 3 | 0 | 0 | 0 | 0 | 0 | 1 |
|  | HF                                                           | 2 | 0 | 0 | 0 | 0 | 0 | 1 |
|  | Kidney injury, as defined by component study                 | 1 | 0 | 0 | 0 | 0 | 0 | 1 |
|  | CV mortality                                                 | 4 | 0 | 0 | 0 | 0 | 0 | 1 |
|  | Composite kidney outcome                                     | 1 | 0 | 0 | 0 | 0 | 0 | 1 |
|  | CHD                                                          | 1 | 0 | 0 | 0 | 0 | 1 | 0 |
|  | CHD and fatal or non-fatal stroke                            | 1 | 0 | 0 | 0 | 1 | 0 | 0 |
|  | CHD and fatal or non-fatal stroke and hospitalization for HF | 1 | 0 | 0 | 0 | 0 | 1 | 0 |
|  | Hypoglycemia                                                 | 1 | 0 | 0 | 0 | 0 | 0 | 1 |
|  | Severe hypoglycemia                                          | 2 | 0 | 0 | 0 | 0 | 0 | 1 |
|  | Retinopathy                                                  | 1 | 0 | 0 | 0 | 0 | 0 | 1 |
|  | Microalbuminuria                                             | 1 | 0 | 0 | 0 | 0 | 0 | 1 |
|  | Neuropathy                                                   | 1 | 0 | 0 | 0 | 0 | 0 | 1 |
|  | Peripheral vascular events                                   | 1 | 0 | 0 | 0 | 0 | 0 | 1 |

Strong evidence: *r* or  $R^2$  values reported for all associations examined, and all associations classified as statistically significant and high-strength according to criteria proposed by the Institute for Quality and Efficiency in Health Care (IQWiG) ( $r \geq 0.85$  or  $R^2 \geq 0.72$ ).<sup>64</sup>; Moderate evidence: *r* or  $R^2$  values reported for all associations examined, and one or more (but not all) classified as statistically significant and high-strength; Modest evidence: *r* or  $R^2$  values reported for some associations examined, and one or more (but not all) classified as statistically significant and high-strength. Any other *r*,  $R^2$ , slopes, effect estimates, or results from meta-regression analyses classified as statistically significant; Weak evidence: No *r* or  $R^2$  values classified as both statistically significant and high-strength, but all *r*,  $R^2$ , slopes, effect estimates, or results from meta-regression analyses classified as statistically significant; Limited evidence: No *r* or  $R^2$  values classified as both statistically significant and high-strength, some *r*,  $R^2$ , slopes, effect estimates, or results from meta-regression analyses classified as statistically significant and some not; No evidence: No *r* or  $R^2$  values classified as statistically significant and high-strength, and all *r*,  $R^2$ , slopes, effect estimates, or results from meta-regression analyses classified as non-statistically significant.

ADAS-Cog, Alzheimer's Disease Assessment Scale – Cognitive Subscale; AIDS, acquired immunodeficiency syndrome; BMD, bone mineral density; CDR-SB; Clinical Dementia Rating – Sum of Boxes; CHD, coronary heart disease; CHF, coronary heart failure; CV, cardiovascular; ESRD, end-stage kidney disease; FEV1, forced expiratory volume in 1 second; GFR, glomerular filtration rate; HAQ-DI, Health Assessment Questionnaire Disability Index; HbA1c, hemoglobin A1c; HF, heart failure; HIV, human immunodeficiency virus; LDL-C, low-density lipoprotein; MACE, major adverse cardiovascular event; MI, myocardial infarction; mL, milliliter; MMSE, Mini-Mental State Examination; PGA, Patient Global Assessment; *r*, correlation coefficient; SDS, Sheehan Disability Scale; SF-36 MCS, Short form 36 mental component; SGRQ, St. George's Respiratory Questionnaire; TDI, Townsend Deprivation Index;



| eTable 2. Alzheimer's disease |              |                     |                                                                                                                                         |                |                            |                            |                   |             |                                                                      |                                                                                                                                |                                                                                                                                                                                                                   |                                                                                                                                                                                                                                                                                        |
|-------------------------------|--------------|---------------------|-----------------------------------------------------------------------------------------------------------------------------------------|----------------|----------------------------|----------------------------|-------------------|-------------|----------------------------------------------------------------------|--------------------------------------------------------------------------------------------------------------------------------|-------------------------------------------------------------------------------------------------------------------------------------------------------------------------------------------------------------------|----------------------------------------------------------------------------------------------------------------------------------------------------------------------------------------------------------------------------------------------------------------------------------------|
| Author, Year                  | Study design | Indication          | Interventions                                                                                                                           | Funding source | Design of included studies | Surrogate marker           | Clinical endpoint | No. studies | Overall sample size   No. surrogate measures   No. clinical outcomes | Evidence                                                                                                                       | Author's conclusion                                                                                                                                                                                               | Plaintext summary                                                                                                                                                                                                                                                                      |
| Pang 2022 <sup>11</sup>       | MA           | Alzheimer's Disease | aducanumab<br>bapineuzumab<br>bexarotene<br>donanemab<br>gantenerumab;<br>lecanemab-irnb<br>semagacestat<br>solanezumab<br>verubecestat | Industry       | RCT                        | Amyloid beta plaque by PET | CDR-SB            | 15          | NR   4592   10611                                                    | A 0.1 unit decrease in PET A $\beta$ SUVR is associated with a decreased reduction in the CDR-SB score of 0.09 (0.034 to 0.15) | "This meta-analysis provides statistically significant evidence of a likely causal relationship between a reduction in A $\beta$ plaque and a reduction in cognitive and functional decline in patients with AD." | Using two additional RCTs, updating trial results, and correcting inconsistencies found in Ackley 2021, reductions in A $\beta$ plaque were associated with decreased reductions on several cognitive rating scales. Further analysis suggested a causal relationship between the two. |
|                               |              |                     |                                                                                                                                         |                |                            |                            | ADAS-Cog          | 15          | NR   4467   11885                                                    | A 0.1 unit decrease in PET A $\beta$ SUVR is associated with a decreased reduction in ADAS-Cog score of 0.33 (0.12 to 0.55)    |                                                                                                                                                                                                                   |                                                                                                                                                                                                                                                                                        |
|                               |              |                     |                                                                                                                                         |                |                            |                            | MMSE              | 16          | NR   4612   11747                                                    | A 0.1 unit decrease in PET A $\beta$                                                                                           |                                                                                                                                                                                                                   |                                                                                                                                                                                                                                                                                        |

|                              |      |  |                                                                                                              |            |     |      |                 |                   |                                                                                                                     |                                                                                                                       |                                                                                                                                                                                               |                                                                                                                                                                                                 |
|------------------------------|------|--|--------------------------------------------------------------------------------------------------------------|------------|-----|------|-----------------|-------------------|---------------------------------------------------------------------------------------------------------------------|-----------------------------------------------------------------------------------------------------------------------|-----------------------------------------------------------------------------------------------------------------------------------------------------------------------------------------------|-------------------------------------------------------------------------------------------------------------------------------------------------------------------------------------------------|
|                              |      |  |                                                                                                              |            |     |      |                 |                   |                                                                                                                     | SUVR is associated with a decreased reduction in MMSE score of 0.13 (0.017 to 0.24)                                   |                                                                                                                                                                                               |                                                                                                                                                                                                 |
| Ackley 2021 <sup>10</sup>    | MA   |  | bapineuzumab<br>bexarotene<br>gantenerumab<br>lecanemab-irimb<br>semagacestat<br>solanezumab<br>verubecestat | Government | RCT |      | CDR-SB          | 10 <sup>1</sup>   | NR   3868   7238                                                                                                    | A 0.1 unit decrease in PET Aβ SUVR is associated with a decreased reduction in CDR-SB score of 0.051 (-0.027 to 0.13) | "Pooled evidence from available trials reporting both reduction in amyloid levels and change in cognition suggests that amyloid reduction strategies do not substantially improve cognition." | In pooled estimates from 14 RCTs, there was no significant association between reductions in Aβ plaque as measured by PET and cognitive decline as measured by several cognitive rating scales. |
|                              |      |  |                                                                                                              |            |     | MMSE | 14 <sup>2</sup> | NR   4345   13609 | A 0.1 unit decrease in PET Aβ SUVR is associated with a decreased reduction in MMSE score of 0.087 (-0.042 to 0.22) |                                                                                                                       |                                                                                                                                                                                               |                                                                                                                                                                                                 |
| Avgerinos 2021 <sup>12</sup> | SRMA |  | aducanumab<br>bapineuzumab<br>gantenerumab<br>solanezumab                                                    | Government | RCT |      | ADAS-Cog        | 9 <sup>3, 4</sup> | 10966   2804   7968                                                                                                 | Pearson's correlation coefficient between the effect sizes of PET Aβ SUVR and change in                               | "We found that reductions in Aβ brain deposition were associated with improvements of cognition... However,                                                                                   | Reductions in Aβ brain deposition were associated with improvements in cognition as measured by the MMSE, but not significantly                                                                 |

|  |  |  |  |  |  |  |        |                   |                     |                                                                                                                   |                                                                                               |                                                                                              |
|--|--|--|--|--|--|--|--------|-------------------|---------------------|-------------------------------------------------------------------------------------------------------------------|-----------------------------------------------------------------------------------------------|----------------------------------------------------------------------------------------------|
|  |  |  |  |  |  |  |        |                   |                     | ADAS-Cog score 0.68, p=0.02                                                                                       | reduction on amyloid PET SUVR was not significantly correlated with improvement on CDR-SB..." | correlated with improvements on the CDR-SB, which also takes functional status into account. |
|  |  |  |  |  |  |  | CDR-SB | 9 <sup>3, 4</sup> | 10966   2804   7717 | Pearson's correlation coefficient between the effect sizes of PET Aβ SUVR and change in CDR-SB score 0.51, p=0.09 |                                                                                               |                                                                                              |

CDR-SB: Clinical Dementia Rating Scale–sum of boxes; MMSE: Mini Mental State Examination; ADAS-Cog: Alzheimer's Disease Assessment Scale–Cognitive subscale; PET Aβ SUVR: Positron Emission Tomography Amyloid-Beta Standardized Uptake Volume Ratio; RCT: Randomized Control Trial

- 1: A discrepancy was present between the number of studies noted in the text and in the tables
- 2: 2 studies used other clinical rating scales that were converted
- 3: Using the same counting method as the above meta-analyses
- 4: There is a lack of clarity on the number of Solanezumab trials used in this specific analysis

| eTable 3. Primary Glomerular Disease |              |                 |                                                                                                          |                |                            |                                                           |                                              |             |                                                                      |                                                                                                                                                                                                                                                                                                                                |                                                                                                                                                                                                                                                                                                                                  |                                                                                                                                                                                                                                       |
|--------------------------------------|--------------|-----------------|----------------------------------------------------------------------------------------------------------|----------------|----------------------------|-----------------------------------------------------------|----------------------------------------------|-------------|----------------------------------------------------------------------|--------------------------------------------------------------------------------------------------------------------------------------------------------------------------------------------------------------------------------------------------------------------------------------------------------------------------------|----------------------------------------------------------------------------------------------------------------------------------------------------------------------------------------------------------------------------------------------------------------------------------------------------------------------------------|---------------------------------------------------------------------------------------------------------------------------------------------------------------------------------------------------------------------------------------|
| Author, Year                         | Study design | Indication      | Interventions                                                                                            | Funding source | Design of included studies | Surrogate marker                                          | Clinical outcome                             | No. studies | Overall sample size   No. surrogate measures   No. clinical outcomes | Evidence                                                                                                                                                                                                                                                                                                                       | Author's conclusion                                                                                                                                                                                                                                                                                                              | Plaintext Summary                                                                                                                                                                                                                     |
| Inker 2016 <sup>13</sup>             | IPD MA       | IgA Nephropathy | dipyridamole<br>fish oil<br>immunosuppression (mycophenolate, azathioprine)<br>steroids<br>RAAS blockade | University     | RCT                        | Median 9 month (range: 5-12 months) change in proteinuria | Doubling of serum creatinine, ESRD, or death | 11          | 830   NA   128                                                       | For a 50% decline in proteinuria in treatment groups at 9 months, hazard ratio of the composite clinical outcome over longer follow-up in a fully-adjusted model based off of individual patient data 0.40 (0.32 to 0.49), p<0.001<br><br>For a given treatment effect on urine protein excretion, the treatment effect on the | “Overall, the evidence presented here suggests that when considered in conjunction with the evidence from experimental studies, findings from our analyses may be sufficient to recommend the use of proteinuria as a surrogate endpoint in interventions that work by a similar mechanism evaluated in the current analysis...” | A decrease in proteinuria at 9 months for patients with IgA nephropathy was associated with decreased likelihood of the composite clinical outcome of doubling of serum creatinine, ESRD, or death over a longer period of follow-up. |

|  |  |  |  |  |  |  |  |  |  |                                                                                                                                                                                                                                                                                                                                            |  |  |
|--|--|--|--|--|--|--|--|--|--|--------------------------------------------------------------------------------------------------------------------------------------------------------------------------------------------------------------------------------------------------------------------------------------------------------------------------------------------|--|--|
|  |  |  |  |  |  |  |  |  |  | <p>composite clinical outcome is expected to be 2.15 (95% Bayesian credible interval 0.10 to 4.32), the treatment effect on urine protein excretion when the respective treatment effects are expressed on the log hazard ratio and log geometric mean scales.</p> <p>R<sup>2</sup> 0.91, (95% Bayesian credible interval 0.47 to 1.0)</p> |  |  |
|--|--|--|--|--|--|--|--|--|--|--------------------------------------------------------------------------------------------------------------------------------------------------------------------------------------------------------------------------------------------------------------------------------------------------------------------------------------------|--|--|

RAAS: Renin-angiotensin aldosterone system; ESRD: End-stage renal disease

| eTable 4. Chronic kidney disease |              |                                                                                                                                                                  |                                                                                                                                                                                                                 |                |                           |                                                                                               |                                                                                      |             |                                                                      |                                                                                                                                                                                                                                                                                                                                                  |                                                                                                            |                                                                                                                                                                                                                                                                                                |
|----------------------------------|--------------|------------------------------------------------------------------------------------------------------------------------------------------------------------------|-----------------------------------------------------------------------------------------------------------------------------------------------------------------------------------------------------------------|----------------|---------------------------|-----------------------------------------------------------------------------------------------|--------------------------------------------------------------------------------------|-------------|----------------------------------------------------------------------|--------------------------------------------------------------------------------------------------------------------------------------------------------------------------------------------------------------------------------------------------------------------------------------------------------------------------------------------------|------------------------------------------------------------------------------------------------------------|------------------------------------------------------------------------------------------------------------------------------------------------------------------------------------------------------------------------------------------------------------------------------------------------|
| Author, Year                     | Study design | Indication                                                                                                                                                       | Interventions                                                                                                                                                                                                   | Funding source | Included studies' designs | Surrogate marker                                                                              | Clinical endpoint                                                                    | No. studies | Overall sample size   No. surrogate measures   No. clinical outcomes | Evidence                                                                                                                                                                                                                                                                                                                                         | Author's conclusion                                                                                        | Plaintext summary                                                                                                                                                                                                                                                                              |
| Inker 2019 <sup>14 1</sup>       | SRMA         | CKD (unspecified), diabetic nephropathy, hypertensive nephropathy, diabetes, polycystic kidney disease, IgA nephropathy, lupus nephritis, membranous nephropathy | allopurinol<br>empagliflozin<br>RAAS blockade<br>simvastatin + ezetimibe<br>sulodexide<br>immunosuppression<br>albuminuria targeted protocol<br>intensive BP control<br>intensive glucose control<br>nurse care | Non-profit     | RCT only                  | GFR change in 3 years or changes in GFR from 3 months after treatment initiation to study end | Treated ESRD, eGFR <15 mL/min per 1.73 m <sup>2</sup> , doubling of serum creatinine | 47          | 60620   NR   7115                                                    | Median R <sup>2</sup> 0.97, 95% Bayesian credible interval 0.78 to 1.00 for the treatment effects on the baseline to 3-year GFR slope compared to treatment effects on the clinical endpoints<br><br>Median R <sup>2</sup> 0.96, 95% Bayesian credible interval 0.63 to 1.00 for the treatment effects on the GFR slope beginning 3 months after | "With large enough sample sizes, GFR slope may be a viable surrogate for clinical end points in CKD RCTs." | When averaged across a large number of trial participants and when compared to a control group, a treatment's effects on GFR from baseline to 3 year mark and from 3 months post-treatment initiation to the end of each study were predictive of its effects on a standard clinical endpoint. |

|                              |        |                                                                                                                             |                                                                                |          |          |                                                                                      |              |    |                                                                                                                                                          |                                                                                                                                                                                                                                       |                                                                                                                                                                                                                                                                                                   |                                                                                                                                                                                                                                                                                                    |
|------------------------------|--------|-----------------------------------------------------------------------------------------------------------------------------|--------------------------------------------------------------------------------|----------|----------|--------------------------------------------------------------------------------------|--------------|----|----------------------------------------------------------------------------------------------------------------------------------------------------------|---------------------------------------------------------------------------------------------------------------------------------------------------------------------------------------------------------------------------------------|---------------------------------------------------------------------------------------------------------------------------------------------------------------------------------------------------------------------------------------------------------------------------------------------------|----------------------------------------------------------------------------------------------------------------------------------------------------------------------------------------------------------------------------------------------------------------------------------------------------|
|                              |        |                                                                                                                             |                                                                                |          |          |                                                                                      |              |    |                                                                                                                                                          | trial onset to trial end compared to treatment effects on the clinical endpoint                                                                                                                                                       |                                                                                                                                                                                                                                                                                                   |                                                                                                                                                                                                                                                                                                    |
| Heerspink 2014 <sup>15</sup> | IPD MA | CKD (unspecified), diabetic nephropathy, hypertensive nephropathy, IgA nephropathy, lupus nephritis, membranous nephropathy | RAAS blockade<br>low protein diet<br>intensive BP control<br>immunosuppression | Industry | RCT only | GFR change in 12 months                                                              | Treated ESRD | 37 | 9488   NR   2661                                                                                                                                         | Compared to a 0% decline in eGFR from baseline in 12 months, hazard ratio of this clinical endpoint after a 30% decline in a fully adjusted model: 9.8 (7.0 to 13.7)<br><br>For a 40% decline in the same model: 21.0, (13.4 to 32.7) | "These results provide further support for the validity of these alternative eGFR-based end points in clinical trials of CKD progression" / The consistent associations that we observed are not sufficient to claim surrogacy and should be interpreted in conjunction with additional analyses" | When compared to trial participants who had no change in eGFR within 12 months, those who had either a 30% or 40% reduction in were significantly more likely to progress to a currently accepted clinical endpoint, though the authors caution against using this study alone to claim surrogacy. |
|                              |        |                                                                                                                             |                                                                                |          |          | Treated ESRD, eGFR <15 mL/min per 1.73 m <sup>2</sup> , doubling of serum creatinine |              |    | Compared to a 0% decline in eGFR from baseline in 12 months, hazard ratio of developing these clinical endpoints after a 30% decline in a fully adjusted |                                                                                                                                                                                                                                       |                                                                                                                                                                                                                                                                                                   |                                                                                                                                                                                                                                                                                                    |

|  |  |  |  |  |  |  |  |  |  |                                                                                                                                                                                                                                                                 |  |  |
|--|--|--|--|--|--|--|--|--|--|-----------------------------------------------------------------------------------------------------------------------------------------------------------------------------------------------------------------------------------------------------------------|--|--|
|  |  |  |  |  |  |  |  |  |  | <p>model: 9.6<br/>(7.3 to 12.6)</p> <p>For a 40% decline in the same model: 20.3<br/>(14.1 to 29.2)</p>                                                                                                                                                         |  |  |
|  |  |  |  |  |  |  |  |  |  | <p>Treated ESRD, eGFR &lt;15 mL/min per 1.73 m<sup>2</sup>, doubling of serum creatinine, and death</p>                                                                                                                                                         |  |  |
|  |  |  |  |  |  |  |  |  |  | <p>Compared to a 0% decline in eGFR from baseline in 12 months, hazard ratio of developing these clinical endpoints after a 30% decline in a fully adjusted model: 7.3<br/>(5.6 to 9.5)</p> <p>For a 40% decline in the same model: 14.2<br/>(10.0 to 20.2)</p> |  |  |

ESRD: End-stage renal disease; RAAS: Renin-angiotensin aldosterone system; GFR: Glomerular filtration rate; eGFR: Estimated glomerular filtration rate

<sup>1</sup> We did not consider an additional study from Inker et al. 2014 (PMID: 25441438), which was found to be largely overlapping with the other Inker et al. 2019 study.



| eTable 5. Chronic obstructive pulmonary disease |                 |            |                                                                                                       |                |                            |                  |                                                   |             |                                                                      |                                                                                                              |                                                                                                                                                                        |                                                                                                                                                                                                                                                                                                                                                                            |
|-------------------------------------------------|-----------------|------------|-------------------------------------------------------------------------------------------------------|----------------|----------------------------|------------------|---------------------------------------------------|-------------|----------------------------------------------------------------------|--------------------------------------------------------------------------------------------------------------|------------------------------------------------------------------------------------------------------------------------------------------------------------------------|----------------------------------------------------------------------------------------------------------------------------------------------------------------------------------------------------------------------------------------------------------------------------------------------------------------------------------------------------------------------------|
| Author, Year                                    | Study design    | Indication | Interventions                                                                                         | Funding source | Design of included studies | Surrogate marker | Clinical endpoint                                 | No. studies | Overall sample size   No. surrogate measures   No. clinical outcomes | Evidence                                                                                                     | Author's conclusion                                                                                                                                                    | Plaintext Summary                                                                                                                                                                                                                                                                                                                                                          |
| Donohue 2018 <sup>17</sup>                      | Pooled analysis | COPD       | indacaterol<br>formoterol<br>glycopyrrolate<br>salmeterol<br>tiotropium<br>indacaterol/glycopyrrolate | Industry       | RCT                        | Trough FEV1      | Moderate/severe exacerbation rate/yr <sup>1</sup> | 23          | 23213   NR   NR                                                      | Spearman's rank correlation between change in trough FEV1 from baseline and exacerbation rate -0.05, p<0.001 | "Our data suggest that, at a population level, improvements in FEV1 post-bronchodilation correlate with improvements in SGRQ, TDI and exacerbation rate endpoints,..." | Across 23 RCTs, improvements in trough FEV1 from baseline were correlated with both subjective clinical outcomes (measured by the SGRQ and TDI) and objective ones (rescue medication use and moderate-severe exacerbation rate). Greater improvements in FEV1 generally correlated better clinical outcomes. However, the correlation coefficients were all low-strength. |
|                                                 |                 |            |                                                                                                       |                |                            |                  | Rescue medication use (puffs/day)                 |             |                                                                      | Pearson's correlation coefficient between change in trough FEV1 and rescue medication use -0.11, p<0.001     |                                                                                                                                                                        |                                                                                                                                                                                                                                                                                                                                                                            |
|                                                 |                 |            |                                                                                                       |                |                            |                  | SGRQ                                              |             |                                                                      | Pearson's correlation coefficient between change in trough FEV1 and SGRQ -0.16, p<0.001                      |                                                                                                                                                                        |                                                                                                                                                                                                                                                                                                                                                                            |

|                          |      |                                                                                                                                                                                                                                                                                                                                                              |            |     |  |                                                                      |    |                  |                                                                                                                                                                                                                                                                        |                                                                                                                                                                    |                                                                                                                                                                                                                                                                                                                                                                                                    |
|--------------------------|------|--------------------------------------------------------------------------------------------------------------------------------------------------------------------------------------------------------------------------------------------------------------------------------------------------------------------------------------------------------------|------------|-----|--|----------------------------------------------------------------------|----|------------------|------------------------------------------------------------------------------------------------------------------------------------------------------------------------------------------------------------------------------------------------------------------------|--------------------------------------------------------------------------------------------------------------------------------------------------------------------|----------------------------------------------------------------------------------------------------------------------------------------------------------------------------------------------------------------------------------------------------------------------------------------------------------------------------------------------------------------------------------------------------|
|                          |      |                                                                                                                                                                                                                                                                                                                                                              |            |     |  | TDI                                                                  |    |                  | Pearson's correlation coefficient between change in trough FEV1 from baseline and TDI 0.16, p<0.001                                                                                                                                                                    |                                                                                                                                                                    |                                                                                                                                                                                                                                                                                                                                                                                                    |
| Zider 2017 <sup>16</sup> | SRMA | aclidinium                                                                                                                                                                                                                                                                                                                                                   | University | RCT |  | Moderate-severe exacerbation rate/yr <sup>2</sup>                    | 94 | 119227   NR   NR | For a 100mL greater change in trough FEV1 between treatment and control, the absolute exacerbation rate decreased 0.06/yr (-0.11 to -0.02), p=0.009; R <sup>2</sup> 0.05   Relative risk 0.86 (0.81 to 0.91), slope -0.16 (-0.21 to -0.1) p<0.001; R <sup>2</sup> 0.20 | "This meta-regression analysis revealed a robust correlation between the reduction in risk of COPD exacerbations and therapeutic improvements in lung function..." | Across 94 RCTs utilizing many different therapies, greater improvements in trough FEV1 in treatment versus control arms were associated with both decreases in exacerbation rate and increases in time to first exacerbation from trial start. However, when stratified across medications, the associations were more consistently artistically significant of high-strength for bronchodilators. |
|                          |      | acridinium/formoterol<br>arformoterol<br>azithromycin<br>beclomethasone/formoterol<br>budesonide/formoterol<br>cilomilast<br>erythromycin<br>fluticasone/vilanterol<br>formoterol<br>formoterol + terbutaline<br>glycopyrrolate<br>indacaterol<br>indacaterol/glycopyrrolate<br>losmapimod<br>MK-7123<br>mometasone<br>mometasone/formoterol<br>moxifloxacin |            |     |  | Time to moderate-severe exacerbation beginning from trial initiation | 39 | 73475   NR   NR  | Overall: For a 100mL greater change in trough FEV1 between treatment and control, the hazard ratio to first exacerbation was 0.79 (0.74 to 0.83), slope -0.23 (-                                                                                                       |                                                                                                                                                                    |                                                                                                                                                                                                                                                                                                                                                                                                    |

|                               |      |                                                                         |                                                                                                                                                                                                                                                                      |          |     |  |      |                                           |                                                    |                                                                                                                                                                                                                                |                                                                                                                                                                                                                  |                                                                                                                                                                                                                                                                          |
|-------------------------------|------|-------------------------------------------------------------------------|----------------------------------------------------------------------------------------------------------------------------------------------------------------------------------------------------------------------------------------------------------------------|----------|-----|--|------|-------------------------------------------|----------------------------------------------------|--------------------------------------------------------------------------------------------------------------------------------------------------------------------------------------------------------------------------------|------------------------------------------------------------------------------------------------------------------------------------------------------------------------------------------------------------------|--------------------------------------------------------------------------------------------------------------------------------------------------------------------------------------------------------------------------------------------------------------------------|
|                               |      |                                                                         | roflumilast<br>salmeterol<br>salmeterol +<br>fluticasone<br>salmeterol +<br>roflumilast<br>sibenadet<br>tiotropium<br>tiotropium +<br>salmeterol<br>tiotropium +<br>salmeterol/fluticasone<br>umeclidinium<br>umeclidinium/vilantero<br> <br>vilanterol<br>vitamin D |          |     |  |      |                                           | 0.28 to -0.18);<br>p<0.001; R <sup>2</sup><br>0.85 |                                                                                                                                                                                                                                |                                                                                                                                                                                                                  |                                                                                                                                                                                                                                                                          |
| de la Loge 2016 <sup>18</sup> | SRMA | Studies of COPD not limited to only COPD from α1-antitrypsin deficiency | aclidinium<br>aclidinium/formoterol<br>fluticasone<br>glycopyrrolate<br>indacaterol<br>indacaterol/glycopyrronium<br>salmeterol<br>tiotropium<br>tiotropium/olodaterol<br>umeclidinium                                                                               | Industry | RCT |  | SGRQ | 38 in the full text, 39 in the supplement | 49561   NR   NR                                    | Pearson's correlation coefficient of the difference between first and last trough FEV1 measurements regardless of treatment arm, including placebo, and change in SGRQ in a weighted analysis -0.68 (-0.77 to -0.57), p<0.0001 | "Our primary analysis showed a large and highly significant association between SGRQ and trough FEV1. Analyses with other pairings of spirometric measurements and PROs showed correspondingly large correlation | Across 52 RCTs, improvements in trough FEV1 either in any treatment arms including placebo, or in treatment arms excluding placebo, were associated with improvements in subjective measurements (the patient reported outcomes of SGRQ and TDI) and objective ones (any |

|  |  |  |                                            |  |  |  |  |                                                             |                                                                                         |                                    |                                                       |                 |                                                                                                                                                                                                                                                                                                              |
|--|--|--|--------------------------------------------|--|--|--|--|-------------------------------------------------------------|-----------------------------------------------------------------------------------------|------------------------------------|-------------------------------------------------------|-----------------|--------------------------------------------------------------------------------------------------------------------------------------------------------------------------------------------------------------------------------------------------------------------------------------------------------------|
|  |  |  | umeclidinium/vilanterol<br> <br>vilanterol |  |  |  |  |                                                             | For every 100mL change in trough FEV1, there was a corresponding 5.89 reduction in SGRQ | coefficients, and a similar trend” | exacerbation, or moderate-severe exacerbations only). |                 |                                                                                                                                                                                                                                                                                                              |
|  |  |  |                                            |  |  |  |  | TDI                                                         | 22 in the full text, 21 in the supplement                                               |                                    |                                                       | 25336   NR   NR | Pearson’s correlation coefficient of the difference between first and last trough FEV1 measurement regardless of treatment arm, including placebo, and change in TDI in a weighted analysis 0.57 (0.38 to 0.71)<br><br>For every 100mL change in trough FEV1, there was a corresponding 1.88 increase in TDI |
|  |  |  |                                            |  |  |  |  | Mild, moderate, or severe exacerbation rate/yr <sup>3</sup> | 10                                                                                      |                                    |                                                       | 9530   NR   NR  | Pearson’s correlation coefficient of the difference between first and last trough FEV1 measurement regardless of treatment arm, including placebo, and                                                                                                                                                       |

|  |  |  |  |  |  |  |                                                      |    |                 |                                                                                                                                                                                                                              |  |  |
|--|--|--|--|--|--|--|------------------------------------------------------|----|-----------------|------------------------------------------------------------------------------------------------------------------------------------------------------------------------------------------------------------------------------|--|--|
|  |  |  |  |  |  |  |                                                      |    |                 | change in rate for any type of COPD exacerbation - 0.69 (-0.85 to -0.39)<br><br>An improvement in 100mL of FEV1 corresponds to an exacerbation rate of 0.49/yr, while no change corresponds to a rate of 2.30/yr<br>p=0.0002 |  |  |
|  |  |  |  |  |  |  | Moderate or severe exacerbation rate/yr <sup>3</sup> | 23 | 30068   NR   NR | Pearson's correlation coefficient - 0.57 (-0.71 to -0.39)<br><br>An improvement in 100mL of FEV1 corresponds to an exacerbation rate of 0.66/yr, while no change corresponds to a rate of 0.94/yr<br>p<0.0001                |  |  |

|                           |      |  |                                                                                                                                                                                                                                                                                                                                   |          |     |  |                                                                                   |                      |                                                   |                                                                                                                                                                                                                                    |                                                                                                                                          |                                                                                                                                                                                                                                                                                                                                                                                                                                           |
|---------------------------|------|--|-----------------------------------------------------------------------------------------------------------------------------------------------------------------------------------------------------------------------------------------------------------------------------------------------------------------------------------|----------|-----|--|-----------------------------------------------------------------------------------|----------------------|---------------------------------------------------|------------------------------------------------------------------------------------------------------------------------------------------------------------------------------------------------------------------------------------|------------------------------------------------------------------------------------------------------------------------------------------|-------------------------------------------------------------------------------------------------------------------------------------------------------------------------------------------------------------------------------------------------------------------------------------------------------------------------------------------------------------------------------------------------------------------------------------------|
| Martin 2016 <sup>19</sup> | SRMA |  | aclidinium<br>beclomethasone/formoterol<br>budesonide/formoterol<br>fluticasone + vilanterol<br>fluticasone/salmeterol<br>formoterol<br>glycopyrrolate<br>ipratropium<br>idacaterol<br>roflumilast<br>salmeterol<br>salmeterol/fluticasone<br>tiotropium<br>theophylline<br>umeclidinium<br>umeclidinium/vilanterol<br>vilanterol | Industry | RCT |  | Time to first exacerbation <sup>4</sup>                                           | 12 (21 observations) | 20704   NR   6077 exacerbations (data incomplete) | For a 100mL difference in trough FEV1 between treatment arms, the corresponding change in log relative risk of time to first mild, moderate, or severe exacerbation: slope -3.56, p=0.0001 R <sup>2</sup> 0.5568 (adjusted 0.5335) | "In conclusion, this study demonstrates a significant association between improvements in FEV1...and lower risk for COPD exacerbations." | Across 12 studies, greater changes in FEV1 when comparing between treatment arms were associated with longer times to first exacerbations and improvements in exacerbation rate when defined as moderate/severe, but was only associated with longer times to first exacerbation when defined as mild/moderate/severe. However, in the cases where there was a significant association, the R <sup>2</sup> values were not high-strength. |
|                           |      |  |                                                                                                                                                                                                                                                                                                                                   |          |     |  | Exacerbations /yr                                                                 |                      |                                                   | For a 100mL difference in trough FEV1 between treatment arms, the corresponding rate of change of relative risk of mild, moderate, or severe exacerbations per year: slope: 0.078, p=0.9199                                        |                                                                                                                                          |                                                                                                                                                                                                                                                                                                                                                                                                                                           |
|                           |      |  |                                                                                                                                                                                                                                                                                                                                   |          |     |  | Time to first exacerbation, number of patients with at least one exacerbation, or | 12 (26 observations) | 22472   NR   9042 exacerbations (data incomplete) | For a 100mL difference in trough FEV1 between treatment arms, the corresponding change in log                                                                                                                                      |                                                                                                                                          |                                                                                                                                                                                                                                                                                                                                                                                                                                           |

|                             |                    |                                 |                                         |          |     |  |                       |                   |                                                                                                                                                                                                      |                                                                                                                                                                                                                                                        |                                                                                                                                                                                                                                                                                                                                                                                                            |                                                                                                                                                                                                                                                                                                                                                                  |
|-----------------------------|--------------------|---------------------------------|-----------------------------------------|----------|-----|--|-----------------------|-------------------|------------------------------------------------------------------------------------------------------------------------------------------------------------------------------------------------------|--------------------------------------------------------------------------------------------------------------------------------------------------------------------------------------------------------------------------------------------------------|------------------------------------------------------------------------------------------------------------------------------------------------------------------------------------------------------------------------------------------------------------------------------------------------------------------------------------------------------------------------------------------------------------|------------------------------------------------------------------------------------------------------------------------------------------------------------------------------------------------------------------------------------------------------------------------------------------------------------------------------------------------------------------|
|                             |                    |                                 |                                         |          |     |  | exacerbations/<br>yr, |                   |                                                                                                                                                                                                      | relative risk of<br>time to first<br>moderate, or<br>severe<br>exacerbation:<br>slope -1.46,<br>p=0.045 R <sup>2</sup><br>0.1574<br>(adjusted<br>0.1223)                                                                                               |                                                                                                                                                                                                                                                                                                                                                                                                            |                                                                                                                                                                                                                                                                                                                                                                  |
| Jones<br>2011 <sup>20</sup> | Pooled<br>analysis | COPD<br>from<br>smoking<br>only | formoterol<br>indacaterol<br>tiotropium | Industry | RCT |  | TDI                   | 3                 | 2781   NR  <br>NR                                                                                                                                                                                    | Pearson's<br>correlation<br>coefficient<br>between<br>individual<br>changes in<br>trough FEV1<br>and<br>improvements<br>in TDI at 12<br>weeks 0.15,<br>p<0.001;<br><br>Between five<br>cohorts<br>grouped by<br>trough FEV1<br>change and<br>TDI: 0.90 | "...improvement in FEV1 is significantly related to changes in the patient-reported outcomes of TDI, SGRQ, exacerbation rate and rescue medication use... These relationships were significant at both an individual and population level, although correlations were much stronger in the population-based analyses... These results suggest that larger improvements in FEV1 are likely to be associated | In a pooled analysis of three trials of indacaterol, changes in FEV1 were associated with improvements in subjective outcomes—TDI and SGRQ—and objective ones—exacerbations per year and rescue medication use. These associations were significantly stronger on a population level than at individual one, though they were statistically significant in both. |
|                             |                    |                                 |                                         |          |     |  |                       | 2208   NR  <br>NR | Pearson's<br>correlation<br>coefficient<br>between<br>individual<br>changes in<br>trough FEV1<br>and<br>improvements<br>in TDI at<br>24/26 weeks<br>0.14,<br>p<0.001;<br><br>Between five<br>cohorts |                                                                                                                                                                                                                                                        |                                                                                                                                                                                                                                                                                                                                                                                                            |                                                                                                                                                                                                                                                                                                                                                                  |

|  |  |  |  |  |  |  |      |  |                |                                                                                                                                                                                                        |                                                                             |  |
|--|--|--|--|--|--|--|------|--|----------------|--------------------------------------------------------------------------------------------------------------------------------------------------------------------------------------------------------|-----------------------------------------------------------------------------|--|
|  |  |  |  |  |  |  |      |  |                | grouped by trough FEV1 change and TDI: 0.88<br><br>For a 100mL change in trough FEV1 regardless of treatment group, there was a corresponding 0.46 increase in TDI at 24/26 weeks, p<0.0001            | with larger patient-reported benefits across a range of clinical outcomes." |  |
|  |  |  |  |  |  |  |      |  | 1099   NR   NR | Pearson's correlation coefficient between individual changes in trough FEV1 and improvements in TDI at 52 weeks 0.18, p<0.001;<br><br>Between five cohorts grouped by trough FEV1 change and TDI: 0.92 |                                                                             |  |
|  |  |  |  |  |  |  | SGRQ |  | 3141   NR   NR | Pearson's correlation coefficient between individual changes in trough FEV1 and improvements                                                                                                           |                                                                             |  |



|  |  |  |  |  |  |  |  |  |                |                                                                                                                                                                                                            |  |  |
|--|--|--|--|--|--|--|--|--|----------------|------------------------------------------------------------------------------------------------------------------------------------------------------------------------------------------------------------|--|--|
|  |  |  |  |  |  |  |  |  |                | in SGRQ at 12 weeks - 0.12, p<0.001;<br>Between five cohorts grouped by trough FEV1 change and SGRQ: -0.90                                                                                                 |  |  |
|  |  |  |  |  |  |  |  |  | 2215   NR   NR | Pearson's correlation coefficient between individual changes in trough FEV1 and improvements in SGRQ at 24/26 weeks - 0.07, p<0.001;<br>Between five cohorts grouped by trough FEV1 change and SGRQ: -0.79 |  |  |
|  |  |  |  |  |  |  |  |  | 1115   NR   NR | Pearson's correlation coefficient between individual changes in trough FEV1 and improvements in SGRQ at 52 weeks - 0.16, p<0.001<br>Between five cohorts                                                   |  |  |

|  |  |  |  |  |  |  |                                   |  |                   |                                                                                                                                                                                                                                                                                                                                                                |  |  |
|--|--|--|--|--|--|--|-----------------------------------|--|-------------------|----------------------------------------------------------------------------------------------------------------------------------------------------------------------------------------------------------------------------------------------------------------------------------------------------------------------------------------------------------------|--|--|
|  |  |  |  |  |  |  |                                   |  |                   | grouped by<br>trough FEV1<br>change and<br>SGRQ: -0.95                                                                                                                                                                                                                                                                                                         |  |  |
|  |  |  |  |  |  |  | Exacerbations<br><sup>5</sup> /yr |  | 3158   NR  <br>NR | <p>Pearson's correlation coefficient between individual changes in trough FEV1 and exacerbations /yr -0.06, p&lt;0.001</p> <p>Between five cohorts grouped by trough FEV1 change and exacerbations /yr: -0.89</p> <p>For a 100mL change in trough FEV1 regardless of treatment group, there was a corresponding 12% decrease in exacerbations /yr, p=0.002</p> |  |  |
|  |  |  |  |  |  |  | Severe<br>exacerbations/<br>yr    |  | 3158   NR  <br>NR | <p>Pearson's correlation coefficient between individual changes in trough FEV1 and severe exacerbations</p>                                                                                                                                                                                                                                                    |  |  |

|  |  |  |  |  |  |  |                                   |  |                                                                                                                       |                                                                                                                                                                                                                                                                                                                                                                         |  |  |
|--|--|--|--|--|--|--|-----------------------------------|--|-----------------------------------------------------------------------------------------------------------------------|-------------------------------------------------------------------------------------------------------------------------------------------------------------------------------------------------------------------------------------------------------------------------------------------------------------------------------------------------------------------------|--|--|
|  |  |  |  |  |  |  |                                   |  | <p>/yr -0.03, p=0.1</p> <p>Between five cohorts grouped by trough FEV1 change and severe exacerbations /yr: -0.81</p> |                                                                                                                                                                                                                                                                                                                                                                         |  |  |
|  |  |  |  |  |  |  | Rescue medication use (puffs/day) |  | 3158   NR   NR                                                                                                        | <p>Pearson's correlation coefficient between individual changes in trough FEV1 and puffs/day of rescue medication - 0.11, p&lt;0.001</p> <p>Between five cohorts grouped by trough FEV1 change and rescue medication use: -0.88</p> <p>For a 100mL change in trough FEV1 regardless of treatment group, there was a corresponding 10% decrease in rescue medication</p> |  |  |

|                                |      |      |                                                        |          |     |  |      |    |                    |                                                                                                                                                                                                                                                                                                                                                                                                                                   |                                                                                                                                                |                                                                                                                                                                                                                                                                                                                                                                                              |
|--------------------------------|------|------|--------------------------------------------------------|----------|-----|--|------|----|--------------------|-----------------------------------------------------------------------------------------------------------------------------------------------------------------------------------------------------------------------------------------------------------------------------------------------------------------------------------------------------------------------------------------------------------------------------------|------------------------------------------------------------------------------------------------------------------------------------------------|----------------------------------------------------------------------------------------------------------------------------------------------------------------------------------------------------------------------------------------------------------------------------------------------------------------------------------------------------------------------------------------------|
|                                |      |      |                                                        |          |     |  |      |    |                    | use,<br>p<0.0001                                                                                                                                                                                                                                                                                                                                                                                                                  |                                                                                                                                                |                                                                                                                                                                                                                                                                                                                                                                                              |
| Westwood<br>2011 <sup>21</sup> | SRMA | COPD | arformoterol<br>formoterol<br>salmeterol<br>tiotropium | Industry | RCT |  | SGRQ | 22 | 23245   NR<br>  NR | <p>Pearson's correlation coefficient between change in trough FEV1 in any study arm and change in SGRQ -0.46, p&lt;0.001</p> <p>A 100mL increase in FEV1 in any treatment arm was associated with an improvement of SGRQ of 2.5 (1.9 to 3.1)</p> <p>A 100mL increase in trough FEV1 over baseline change in SGRQ for ΔFEV1=0mL across all treatment arms was associated with an additional 1.6 (0.7 to 2.5) point improvement</p> | "Our analyses indicate, at a study level, that improvement in mean trough FEV1 is associated with proportional improvements in health status." | Increases in trough FEV1 are significantly correlated with improvements in the patient-reported outcomes of SGRQ and TDI and objective measurements of at least one exacerbation across any treatment arm, even when accounting for subjective improvements without FEV1 change into account. The strength of the correlation between SGRQ and increases in trough FEV1 increased with time. |
|                                |      |      |                                                        |          |     |  |      | 5  | 1633   NR   NR     | Pearson's correlation coefficient                                                                                                                                                                                                                                                                                                                                                                                                 |                                                                                                                                                |                                                                                                                                                                                                                                                                                                                                                                                              |

|  |  |  |  |  |  |  |     |   |                 |                                                                                                                                  |  |  |
|--|--|--|--|--|--|--|-----|---|-----------------|----------------------------------------------------------------------------------------------------------------------------------|--|--|
|  |  |  |  |  |  |  |     |   |                 | between change in trough FEV1 in any study arm and change in SGRQ at 3 months: -0.44, p=0.08                                     |  |  |
|  |  |  |  |  |  |  |     | 7 | 3952   NR   NR  | Pearson's correlation coefficient between change in trough FEV1 in any study arm and change in SGRQ at 6 months: -0.61, p=0.004  |  |  |
|  |  |  |  |  |  |  |     | 9 | 17395   NR   NR | Pearson's correlation coefficient between change in trough FEV1 in any study arm and change in SGRQ at 12 months: -0.74, p<0.001 |  |  |
|  |  |  |  |  |  |  | TDI | 8 | 3980   NR   NR  | Pearson's correlation coefficient between change in trough FEV1 across all treatment groups and proportion of                    |  |  |

|  |  |  |  |  |  |  |                           |    |                    |                                                                                                                                                                                                                                                                                                                            |  |  |
|--|--|--|--|--|--|--|---------------------------|----|--------------------|----------------------------------------------------------------------------------------------------------------------------------------------------------------------------------------------------------------------------------------------------------------------------------------------------------------------------|--|--|
|  |  |  |  |  |  |  |                           |    |                    | <p>patients experiencing at least one exacerbation<br/>0.56 p=0.02</p> <p>A 100mL increase in trough FEV1 over baseline change in TDI for <math>\Delta</math>FEV1=0mL across all treatment arms was associated with an additional 5 point increase in TDI.</p>                                                             |  |  |
|  |  |  |  |  |  |  | At least one exacerbation | 29 | 23063   NR<br>  NR | <p>Pearson's correlation coefficient between change in trough FEV1 across all treatment groups and proportion of patients experiencing at least one exacerbation - 0.27 p=0.049;</p> <p>A 100mL increase in trough FEV1 over baseline change for <math>\Delta</math>FEV1=0mL<sup>6</sup> across all treatment arms was</p> |  |  |

|                                                                                                                                                                                                                                                                                                                                                                                                                                                                                                                                                                                                                                                                                                                                                                                                                                                                                                                                                               |  |  |  |  |  |  |  |  |  |  |                                                                                                                                    |  |  |
|---------------------------------------------------------------------------------------------------------------------------------------------------------------------------------------------------------------------------------------------------------------------------------------------------------------------------------------------------------------------------------------------------------------------------------------------------------------------------------------------------------------------------------------------------------------------------------------------------------------------------------------------------------------------------------------------------------------------------------------------------------------------------------------------------------------------------------------------------------------------------------------------------------------------------------------------------------------|--|--|--|--|--|--|--|--|--|--|------------------------------------------------------------------------------------------------------------------------------------|--|--|
|                                                                                                                                                                                                                                                                                                                                                                                                                                                                                                                                                                                                                                                                                                                                                                                                                                                                                                                                                               |  |  |  |  |  |  |  |  |  |  | associated with an additional 6.0% (0.04% to 11.9%) decrease in the proportion of patients experiencing at least one exacerbation. |  |  |
| <p>Moderate-severe exacerbation: Exacerbation requiring an emergency room visit, hospitalization, or an additional medication; Trough FEV1: FEV1 measured immediately before treatment initiation or 23-24 hours after a given dose; SGRQ: St. George's Respiratory Questionnaire; TDI: Transition Dyspnea Index; ICS: Inhaled corticosteroids; PRO: Patient reported outcome</p> <p>1: Defined in this study as requiring intervention—either medication or oxygen, ER visit or hospitalization, or worsening of symptoms for &gt;3 days</p> <p>2: Defined in this study as an addition of a medication or hospitalization</p> <p>3: Defined by each included study individually</p> <p>4: Defined by each included study individually</p> <p>5: Defined as requiring an ER visit/hospitalization, an additional medication or oxygen, or worsening of a respiratory symptom for &gt;3 days</p> <p>6: Calculated theoretically from regression modelling</p> |  |  |  |  |  |  |  |  |  |  |                                                                                                                                    |  |  |

| eTable 6. Gout             |                 |             |                                                               |                        |                            |                                       |                                                |                             |                                                                      |                                                                                                                                                                                                             |                                                                                                                                                                                                                                                                                  |                                                                                                                                                                                                              |
|----------------------------|-----------------|-------------|---------------------------------------------------------------|------------------------|----------------------------|---------------------------------------|------------------------------------------------|-----------------------------|----------------------------------------------------------------------|-------------------------------------------------------------------------------------------------------------------------------------------------------------------------------------------------------------|----------------------------------------------------------------------------------------------------------------------------------------------------------------------------------------------------------------------------------------------------------------------------------|--------------------------------------------------------------------------------------------------------------------------------------------------------------------------------------------------------------|
| Author, Year               | Study design    | Indications | Interventions                                                 | Funding source         | Design of included studies | Surrogate marker                      | Clinical outcome                               | No. studies                 | Overall sample size   No. surrogate measures   No. clinical outcomes | Evidence                                                                                                                                                                                                    | Author's conclusion                                                                                                                                                                                                                                                              | Plaintext Summary                                                                                                                                                                                            |
| Topless 2022 <sup>22</sup> | Pooled analysis | Gout        | allopurinol<br>febuxostat<br>lesinurad<br>varying prophylaxis | Government; university | RCT and 1 open label       | Change in serum urate within 6 months | HAQ-DI (higher scores indicate poorer outcome) | 5 (4 RCTs and 1 open-label) | 3272   NR   7229                                                     | Within the first 6 months of initiation of a new or escalation in an established urate-lowering therapy, the absolute change in serum urate concentration over the most recent month and HAQ-QI had a slope | "A novel study finding was that recent SU level fluctuations associated with reduced HRQOL/function or health status in the first 6-months with ULT initiation or change of ULT in gout, primarily driven by the effects of reduction in SU despite the use of anti-inflammatory | Pooling several RCTs and an open label extension study, reductions in serum urate concentration within 6 months after the initiation or up-titration of a urate-lowering agent were associated with worsened |



|  |  |  |  |  |  |  |                                                 |                  |                                                                                                                                                                                                                                                |                                        |                                                                                                                                                                   |
|--|--|--|--|--|--|--|-------------------------------------------------|------------------|------------------------------------------------------------------------------------------------------------------------------------------------------------------------------------------------------------------------------------------------|----------------------------------------|-------------------------------------------------------------------------------------------------------------------------------------------------------------------|
|  |  |  |  |  |  |  |                                                 |                  | 0.013 (0.007 to 0.019)                                                                                                                                                                                                                         | prophylaxis, usually with colchicine." | patient reported outcomes across several scales. However, baseline serum urate was correlated with frequency of gout flares and poorer patient reported outcomes. |
|  |  |  |  |  |  |  | SDS (higher scores indicate poorer outcome)     | 3175   NR   6463 | Within the first 6 months of initiation of a new or escalation in an established urate-lowering therapy, the absolute change in serum urate concentration over the most recent month and SDS score had a slope of 0.19 (0.05 to 0.32)          |                                        |                                                                                                                                                                   |
|  |  |  |  |  |  |  | SF-36 MCS (lower score indicate poorer outcome) | 3272   NR   7209 | Within the first 6 months of initiation of a new or escalation in an established urate-lowering therapy, the absolute change in serum urate concentration over the most recent month and SD-36 MCS score had a slope of -0.33 (-0.47 to -0.18) |                                        |                                                                                                                                                                   |
|  |  |  |  |  |  |  | PGA (higher scores indicate                     | 3279   NR   8459 | Within the first 6 months of initiation of a new or escalation in                                                                                                                                                                              |                                        |                                                                                                                                                                   |

|  |  |  |  |  |  |  |                                                               |  |                  |                                                                                                                                                                                                                                        |  |  |
|--|--|--|--|--|--|--|---------------------------------------------------------------|--|------------------|----------------------------------------------------------------------------------------------------------------------------------------------------------------------------------------------------------------------------------------|--|--|
|  |  |  |  |  |  |  | poorer outcome)                                               |  |                  | an established urate-lowering therapy, the absolute change in serum urate concentration over the most recent month and PGA score had a slope 0.49 (0.09 to 0.89)                                                                       |  |  |
|  |  |  |  |  |  |  | Pain in the last week (higher scores indicate poorer outcome) |  | 1708   NR   4588 | Within the first 6 months of initiation of a new or escalation in an established urate-lowering therapy, the absolute change in serum urate concentration over the most recent month and pain score had a slope of 0.68 (0.18 to 1.18) |  |  |
|  |  |  |  |  |  |  | SF-36 PCS (lower scores indicate poorer outcomes)             |  | 3272   NR   7209 | Within the first 6 months of initiation of a new or escalation in an established urate-lowering therapy, the absolute change in serum urate concentration over the most                                                                |  |  |

|                                                                                                                                                                                                                                                                    |      |  |                                                                                             |                                     |                                      |                       |            |         |                |                                                                                                                                                                   |                                                                                                                                                                                                                                                                                                                                                                                                                                                                    |                                                                                                                                                                                                                                                                                                                                                               |
|--------------------------------------------------------------------------------------------------------------------------------------------------------------------------------------------------------------------------------------------------------------------|------|--|---------------------------------------------------------------------------------------------|-------------------------------------|--------------------------------------|-----------------------|------------|---------|----------------|-------------------------------------------------------------------------------------------------------------------------------------------------------------------|--------------------------------------------------------------------------------------------------------------------------------------------------------------------------------------------------------------------------------------------------------------------------------------------------------------------------------------------------------------------------------------------------------------------------------------------------------------------|---------------------------------------------------------------------------------------------------------------------------------------------------------------------------------------------------------------------------------------------------------------------------------------------------------------------------------------------------------------|
|                                                                                                                                                                                                                                                                    |      |  |                                                                                             |                                     |                                      |                       |            |         |                | recent month and SD-36 PCS had a slope of -0.13 (-0.27 to 0.01)                                                                                                   |                                                                                                                                                                                                                                                                                                                                                                                                                                                                    |                                                                                                                                                                                                                                                                                                                                                               |
| Stamp 2018 <sup>23</sup>                                                                                                                                                                                                                                           | SRMA |  | allopurinol<br>aproprazone<br>febuxostat<br>lesinurad<br>pegloticase<br>varying prophylaxis | None (industry competing interests) | RCT and open label extension studies | Serum urate < 6 mg/dL | Gout flare | 10 RCTs | 6010   NR   NR | Proportion of individuals reaching target serum urate of <6 mg/dL at 3 months <sup>1</sup> and flare risk ratio, p=0.47<br><br>R <sup>2</sup> for log-RR = 0.0779 | "...there was low-quality evidence to suggest that ULT may be beneficial for the prevention of gout flares...Whilst SU can be considered a biomarker, it did not reach the required level of evidence to be considered a surrogate according to the BSES-3 framework...Despite the current failure of SU to reach the threshold for validation as a surrogate using the BSES-3 framework, the evidence is supportive of a relationship between SU and gout flares. | In 10 RCTs, reduction of serum urate within 3 months had no association with the proportion of patients experiencing a gout flare. From these short RCTs, it appears that serum urate is a poor surrogate measure of clinical outcomes. However, evidence points to associations between longer-term reductions in serum urate with decreases in gout flares. |
| <p>HAQ-DI: Health Assessment Questionnaire Disability Index; SDS: Sheehan Disability Scale; PGA: Patient Global Assessment; SF-36 PCS: Short-form 36 physical component summary SF-36 MCS: Short-form 36 mental component summary; ULT: Urate-lowering therapy</p> |      |  |                                                                                             |                                     |                                      |                       |            |         |                |                                                                                                                                                                   |                                                                                                                                                                                                                                                                                                                                                                                                                                                                    |                                                                                                                                                                                                                                                                                                                                                               |

| eTable 7. HIV            |              |            |               |                      |                            |                                    |                                                       |             |                                                                      |                                                                                                                                                                                                                                                                                                                                                                                                                |                                                                                                                                                                                                                                                                                                                                                                                                  |                                                                                                                                                                                                                                                                        |
|--------------------------|--------------|------------|---------------|----------------------|----------------------------|------------------------------------|-------------------------------------------------------|-------------|----------------------------------------------------------------------|----------------------------------------------------------------------------------------------------------------------------------------------------------------------------------------------------------------------------------------------------------------------------------------------------------------------------------------------------------------------------------------------------------------|--------------------------------------------------------------------------------------------------------------------------------------------------------------------------------------------------------------------------------------------------------------------------------------------------------------------------------------------------------------------------------------------------|------------------------------------------------------------------------------------------------------------------------------------------------------------------------------------------------------------------------------------------------------------------------|
| Author, Year             | Study design | Indication | Interventions | Funding source       | Design of included studies | Surrogate marker                   | Clinical outcome                                      | No. studies | Overall sample size   No. surrogate measures   No. clinical outcomes | Evidence                                                                                                                                                                                                                                                                                                                                                                                                       | Author's conclusion                                                                                                                                                                                                                                                                                                                                                                              | Plaintext Summary                                                                                                                                                                                                                                                      |
| Mills 2008 <sup>24</sup> | SRMA         | HIV-1      | HAART         | Industry; government | RCT                        | HIV-1 RNA viral load <50 copies/mL | Progression to AIDS or death <sup>1</sup> at 48 weeks | 28          | 10795   5369   345                                                   | Regression coefficient of the hazard ratio of achievement of a viral load of <50 copies/mL in the treatment relative to the control arm versus log Peto OR for progression to AIDS/death between arms - 0.04, (-0.31 to 0.20), p=0.71<br><br>R <sup>2</sup> 0.09, p=0.56 (from weighted linear regression of the hazard ratio of achievement of a viral load of <50 copies/mL in the treatment relative to the | "...our findings indicate it is not possible to estimate the proportion of treatment effect associated with surrogate endpoints. We do not imply that the relationship is invalid, rather that the differences observed in...HIV RNA between treatments do[es] not result in meaningful differences in AIDS/death events during the relatively short time period of the RCTs (i.e. 48–96 weeks). | Across RCTs using HAART, differences in proportions of participants achieving low HIV-1 RNA viral loads was not significantly associated with changes in the odds ratio of progression to AIDS or death, though the number of events and scatter of studies was small. |

|  |  |  |  |  |  |                                     |  |   |               |                                                                                                                                                                                                                                                 |  |  |
|--|--|--|--|--|--|-------------------------------------|--|---|---------------|-------------------------------------------------------------------------------------------------------------------------------------------------------------------------------------------------------------------------------------------------|--|--|
|  |  |  |  |  |  |                                     |  |   |               | control arm at 48 weeks versus log Peto OR for progression to AIDS/death between arms weighted by inverse variance)                                                                                                                             |  |  |
|  |  |  |  |  |  | HIV-1 RNA viral load <200 copies/mL |  | 5 | 645   466   7 | Regression coefficient of the hazard ratio of achievement of a viral load of <200 copies/mL in the treatment relative to the control arm at 48 weeks versus log Peto OR for progression to AIDS/death between arms 0.43, (-1.14 to 1.9), p=0.58 |  |  |
|  |  |  |  |  |  |                                     |  |   |               | R <sup>2</sup> 0.86, p=0.02 (from weighted linear regression of the hazard ratio of achievement of a viral load of <200 copies/mL in the treatment relative to the control arm at 48 weeks versus log Peto OR for progression to AIDS/death     |  |  |

|  |  |  |  |  |  |                                     |  |    |                   |                                                                                                                                                                                                                                                 |  |  |
|--|--|--|--|--|--|-------------------------------------|--|----|-------------------|-------------------------------------------------------------------------------------------------------------------------------------------------------------------------------------------------------------------------------------------------|--|--|
|  |  |  |  |  |  |                                     |  |    |                   | between arms weighted by inverse variance)                                                                                                                                                                                                      |  |  |
|  |  |  |  |  |  | HIV-1 RNA viral load <400 copies/mL |  | 15 | 7218   4380   156 | Regression coefficient of the hazard ratio of achievement of a viral load of <400 copies/mL in the treatment relative to the control arm at 48 weeks versus log Peto OR for progression to AIDS/death between arms 0.05 (-0.12 to 0.22), p=0.49 |  |  |
|  |  |  |  |  |  |                                     |  |    |                   | R <sup>2</sup> 0.04, p=0.38 from weighted linear regression of the hazard ratio of achievement of a viral load of <400 copies/mL in the treatment relative to the control arm versus log Peto OR for progression to                             |  |  |

|  |  |  |  |  |  |                                     |                                          |    |              |                                                                                                                                                                                                                                                                                                                      |  |  |
|--|--|--|--|--|--|-------------------------------------|------------------------------------------|----|--------------|----------------------------------------------------------------------------------------------------------------------------------------------------------------------------------------------------------------------------------------------------------------------------------------------------------------------|--|--|
|  |  |  |  |  |  |                                     |                                          |    |              | AIDS/death between arms                                                                                                                                                                                                                                                                                              |  |  |
|  |  |  |  |  |  | HIV-1 RNA viral load <50 copies/mL  | Progression to AIDS or death at 24 weeks | 10 | NR   NR   NR | Regression coefficient of the hazard ratio of achievement of a viral load of <50 copies/mL in the treatment relative to the control arm at 24 weeks versus log Peto OR for progression to AIDS/death between arms - 0.37 (-1.31 to 0.55), p=0.42<br><br>From weighted linear regression: R <sup>2</sup> 0.14, p=0.26 |  |  |
|  |  |  |  |  |  | HIV-1 RNA viral load <200 copies/mL |                                          | 3  | NR   NR   NR | Regression coefficient of the hazard ratio of achievement of a viral load of <200 copies/mL in the treatment relative to the control arm at 24 weeks versus log Peto OR for progression to AIDS/death between arms 0.44 (-1.17 to 2.04), p=0.58                                                                      |  |  |

|  |  |  |  |  |  |                                     |                                          |   |              |                                                                                                                                                                                                                                                                                                                       |  |  |
|--|--|--|--|--|--|-------------------------------------|------------------------------------------|---|--------------|-----------------------------------------------------------------------------------------------------------------------------------------------------------------------------------------------------------------------------------------------------------------------------------------------------------------------|--|--|
|  |  |  |  |  |  |                                     |                                          |   |              | From weighted linear regression: R <sup>2</sup> 0.24, p=0.66                                                                                                                                                                                                                                                          |  |  |
|  |  |  |  |  |  | HIV-1 RNA viral load <400 copies/mL |                                          | 6 | NR   NR   NR | Regression coefficient of the hazard ratio of achievement of a viral load of <400 copies/mL in the treatment relative to the control arm at 24 weeks versus log Peto OR for progression to AIDS/death between arms - 0.51 (-2.30 to 1.27), p=0.57<br><br>From weighted linear regression: R <sup>2</sup> 0.11, p=0.50 |  |  |
|  |  |  |  |  |  | HIV-1 RNA viral load <50 copies/mL  | Progression to AIDS or death at 96 weeks | 3 | NR   NR   NR | Regression coefficient of the hazard ratio of achievement of a viral load of <500 copies/mL in the treatment relative to the control arm at 96 weeks versus log Peto OR for progression to AIDS/death between arms 0.68 (-1.51 to 2.86), p=0.54                                                                       |  |  |



|                                                       |                 |       |                                                                                                                                                                           |              |                                       |                 |                                               |   |                 | From weighted linear regression: R <sup>2</sup> 0.39, p=0.56                                                                                                                                                                                                                                                                                    |                                                                                                                                         |                                                                                                                                                                                                               |
|-------------------------------------------------------|-----------------|-------|---------------------------------------------------------------------------------------------------------------------------------------------------------------------------|--------------|---------------------------------------|-----------------|-----------------------------------------------|---|-----------------|-------------------------------------------------------------------------------------------------------------------------------------------------------------------------------------------------------------------------------------------------------------------------------------------------------------------------------------------------|-----------------------------------------------------------------------------------------------------------------------------------------|---------------------------------------------------------------------------------------------------------------------------------------------------------------------------------------------------------------|
| Staszewski 1998 <sup>25</sup>                         | Pooled analysis | HIV-1 | lamivudine<br>lamivudine + loviride<br>zidovudine<br>zidovudine + didanosine<br>zidovudine + lamivudine<br>zidovudine + lamivudine + loviride<br>zidovudine + zalcitabine | Not reported | RCT, RCT followed by open-label trial | HIV-1 RNA level | Progression to AIDS or death during treatment | 6 | 1488   NR   175 | For every 1 log reduction in mean HIV-1 RNA level during treatment, relative hazard ratio to progression to AIDS or death 0.41 (0.25 to 0.66)<br><br>Averaged over 8-52 weeks of treatment, increased HIV-1 RNA levels are associated with higher rates of adverse events associated with AIDS, reported as "progression," all-cause mortality. | "There was a strong correlation between mean HIV-1 RNA level [averaged over weeks 8-52 of the trial] and the incidence of progression." | In several RCTs, increased levels of HIV-1 RNA averaged across the length of the trial were associated with higher rates of progression to AIDS, defined by AIDS-defining illnesses, and all-cause mortality. |
| 1: Defined by each study—not necessarily AIDS-related |                 |       |                                                                                                                                                                           |              |                                       |                 |                                               |   |                 |                                                                                                                                                                                                                                                                                                                                                 |                                                                                                                                         |                                                                                                                                                                                                               |

**eTable 8. Hypercholesterolemia**

| Author, Year                   | Study design    | Indication                                                 | Interventions                                                               | Funding source                     | Design of included studies | Surrogate marker | Clinical outcome                   | No. studies | Overall sample size   No. surrogate measures   No. clinical outcomes | Evidence                                                                                                                                                                                                                                                   | Author's conclusion                                                                                                                                             | Plaintext Summary                                                                                       |
|--------------------------------|-----------------|------------------------------------------------------------|-----------------------------------------------------------------------------|------------------------------------|----------------------------|------------------|------------------------------------|-------------|----------------------------------------------------------------------|------------------------------------------------------------------------------------------------------------------------------------------------------------------------------------------------------------------------------------------------------------|-----------------------------------------------------------------------------------------------------------------------------------------------------------------|---------------------------------------------------------------------------------------------------------|
| Marston 2019 <sup>33</sup>     | SRMA            | Participants in triglyceride-lowering trials               | unspecified fibrates<br>niacin<br>omega-3 fatty acid<br>unspecified statins | None; industry competing interests | RCT, open-label            | LDL-C            | Major vascular events <sup>1</sup> | 44          | 374358   NR   46180                                                  | For a 1 mmol/L reduction in LDL-C, relative risk for major vascular events 0.80 (0.76 to 0.85), p<0.0001<br><br>With the REDUCE-IT trial removed: For a 1 mmol/L reduction in LDL-C, relative risk for major vascular events 0.79 (0.76 to 0.83), p<0.0001 | "...triglyceride lowering...is associated with lower risk of cardiovascular events, but to a lesser extent per absolute amount of reduction than with LDL-C..." | Across 44 RCTs, reductions in serum LDL-C were associated with decreased risk of major vascular events. |
| Vallejo-Vaz 2018 <sup>36</sup> | Pooled analysis | Non-familial or heterozygous familial hypercholesterolemia | statin + alirocumab<br>statin + ezetimibe                                   | Industry                           | RCT only                   | LDL-C            | MACE <sup>13</sup>                 | 10          | 4972   NR   104                                                      | For a 1 mmol/L decrease LDL-C in the treatment arms, hazard                                                                                                                                                                                                | "In the present analysis of a pooled cohort from 10 ODYSSEY phase 3 trials                                                                                      | Across 10 RCTs evaluating alirocumab combined with a statin,                                            |

|  |  |  |  |  |  |  |  |  |  |                                                                                                                                                             |                                                                                                                                                                                                                                                                                                                          |                                                                                                               |
|--|--|--|--|--|--|--|--|--|--|-------------------------------------------------------------------------------------------------------------------------------------------------------------|--------------------------------------------------------------------------------------------------------------------------------------------------------------------------------------------------------------------------------------------------------------------------------------------------------------------------|---------------------------------------------------------------------------------------------------------------|
|  |  |  |  |  |  |  |  |  |  | <p>ratio: 0.74 (0.62 to 0.89), p=0.0016</p> <p>For a 50% decrease LDL-C from baseline in the treatment arms, hazard ratio 0.70 (0.56 to 0.88), p=0.0020</p> | <p>of alirocumab versus ezetimibe or placebo (added to background statin therapy in most patients)...we observed that...both women and men showed a significant and similar lower risk of MACE with lower achieved LDL-C levels (lower on-treatment LDL-C or greater percentage reductions in LDL-C from baseline)."</p> | <p>further reductions in serum LDL-C were associated with decreased risks of MACEs in both men and women.</p> |
|--|--|--|--|--|--|--|--|--|--|-------------------------------------------------------------------------------------------------------------------------------------------------------------|--------------------------------------------------------------------------------------------------------------------------------------------------------------------------------------------------------------------------------------------------------------------------------------------------------------------------|---------------------------------------------------------------------------------------------------------------|

|                                         |       |                                              |                                                                                                   |                                    |      |       |                                    |    |                     |                                                                                                                                                                                                          |                                                                                                 |                                                                                                                                                                                                                                                                                                                                                                                          |
|-----------------------------------------|-------|----------------------------------------------|---------------------------------------------------------------------------------------------------|------------------------------------|------|-------|------------------------------------|----|---------------------|----------------------------------------------------------------------------------------------------------------------------------------------------------------------------------------------------------|-------------------------------------------------------------------------------------------------|------------------------------------------------------------------------------------------------------------------------------------------------------------------------------------------------------------------------------------------------------------------------------------------------------------------------------------------------------------------------------------------|
| Hourcade-Poteller et 2015 <sup>31</sup> | SRM A | Primary or secondary prevention of CVD       | unspecified statins<br>unspecified fibrates<br>niacin<br>ezetimibe                                | None; industry competing interests | RCTs | LDL-C | Non-fatal MI or cardiac death      | 45 | 132949   NR   NR    | For a 1 mg/dL greater absolute difference in LDL-C between treatment and control, the change in log relative risk of a non-fatal MI or cardiac death 0.00497, SE 0.00094, p<0.0001; R <sup>2</sup> 0.396 | NA - no explicit mention of these analyses in the Discussion section                            | Across 45 trials, greater decreases in LDL-C between treatment and control groups were associated with decreased risk of cardiovascular death and MI. However, no high-strength associations were observed. Furthermore, stratified associations were reported across medications groups (statins, fibrates, niacin; no statistically significant associations were reported for niacin) |
| Stauffer 2013 <sup>35</sup>             | SRM A | Participants in triglyceride-lowering trials | atorvastatin<br>lovastatin<br>pravastatin<br>simvastatin<br>simvastatin/ezetimibe<br>rosuvastatin | Industry                           | RCT  | LDL-C | Major vascular events <sup>2</sup> | 40 | 200593   NR   16843 | The proportional change of LDL-C between treatment in control arms and the log ratio of event rates between                                                                                              | "...LDL-C [was] predictive of cardiovascular events in both primary and secondary populations." | Across 40 RCTs, decreases in LDL-C between arms were associated with fewer events between those arms.                                                                                                                                                                                                                                                                                    |

|                               |       |                                            |                                                                                                                                                                                                                                           |            |     |       |                           |     |                            |                                                                                                                                                                                                                                   |                                                                                                                      |                                                                                                                                      |
|-------------------------------|-------|--------------------------------------------|-------------------------------------------------------------------------------------------------------------------------------------------------------------------------------------------------------------------------------------------|------------|-----|-------|---------------------------|-----|----------------------------|-----------------------------------------------------------------------------------------------------------------------------------------------------------------------------------------------------------------------------------|----------------------------------------------------------------------------------------------------------------------|--------------------------------------------------------------------------------------------------------------------------------------|
|                               |       |                                            | bezafibrate<br>fenofibrate<br>gemfibrozil<br>niacin<br>niacin/gemfibrozil/cholestyramine<br>simvastatin/niacin<br>estrogen-progestin<br>omega-3 fatty acids<br>cholestyramine<br>diet                                                     |            |     |       |                           |     |                            | treatment and control arms of major vascular events across all studies has a slope of 0.624, $p < 0.001$                                                                                                                          |                                                                                                                      |                                                                                                                                      |
| Labreuc he 2010 <sup>32</sup> | SRM A | Participants on lipid-modifying treatments | atorvastatin<br>cerivastatin<br>fluvastatin<br>lovastatin<br>pravastatin<br>simvastatin<br>bezafibrate<br>clofibrate<br>fenofibrate<br>gemfibrozil<br>niacin<br>pioglitazone<br>rosiglitazone<br>troglitazone<br>metformin<br>glimepiride | Non-profit | RCT | LDL-C | Fatal or non-fatal stroke | ≤64 | ≤195488<br>  NA  <br>≤6063 | For each 10 mg/dL greater reduction in LDL-C between treatment and control arms, the absolute change in the relative risk of stroke was 4.5% (1.7% to 7.2%), $p = 0.003$ (fixed effects; analysis consistent with random effects) | “This analysis also confirmed that drug-induced LDL-C reduction was associated with a decrease in stroke incidence.” | Across 64 trials, greater changes in LDL-C between treatment and control arms was associated with decreased relative risk of stroke. |

|                              |        |                           |                                                                                                                                                                                                                         |                                    |     |       |                              |   |                                                        |                                                                                                                                                                                          |                                                                                                                                                                                                                                         |                                                                                                                                                                                                                                                                                                                                   |
|------------------------------|--------|---------------------------|-------------------------------------------------------------------------------------------------------------------------------------------------------------------------------------------------------------------------|------------------------------------|-----|-------|------------------------------|---|--------------------------------------------------------|------------------------------------------------------------------------------------------------------------------------------------------------------------------------------------------|-----------------------------------------------------------------------------------------------------------------------------------------------------------------------------------------------------------------------------------------|-----------------------------------------------------------------------------------------------------------------------------------------------------------------------------------------------------------------------------------------------------------------------------------------------------------------------------------|
|                              |        |                           | <p>glyburide</p> <p>clofibrate + niacin</p> <p>colestipol + niacin</p> <p>gemfibrozil + niacin + cholestyramine</p> <p>simvastatin + ezetimibe</p> <p>statin + ezetimibe + fibrate or niacin</p> <p>statin + niacin</p> |                                    |     |       |                              |   |                                                        |                                                                                                                                                                                          |                                                                                                                                                                                                                                         |                                                                                                                                                                                                                                                                                                                                   |
| Boekholdt 2012 <sup>28</sup> | IPD MA | Statin-treated population | <p>atorvastatin</p> <p>lovastatin</p> <p>pravastatin</p> <p>rosuvastatin</p> <p>simvastatin</p>                                                                                                                         | None; industry competing interests | RCT | LDL-C | Major CV events <sup>3</sup> | 8 | <p>38153   NR   6286 events (in 5387 participants)</p> | <p>The increase in hazard ratio for a major cardiovascular event per 1-SD (32 mg/dL) increase in LDL-C in statin-treated arms 1.13 (1.10 to 1.17), p&lt;0.001</p>                        | <p>“In conclusion, among statin-treated patients, levels of LDL-C, non-HDL-C, and apoB were each strongly associated with the risk of major cardiovascular events, but non-HDL-C was more strongly associated than LDL-C and apoB.”</p> | <p>Across 8 RCTs and analyzing only patients treated with statins, those who achieved lower LDL-C levels had lower rates of cardiovascular events. No significant difference was noted between patients achieving an LDL-C of &lt;100 mg/dL and those with an LDL-C &gt;100 mg/dL if the non-HDL-C level was below 130 mg/dL.</p> |
|                              |        |                           |                                                                                                                                                                                                                         |                                    |     |       |                              |   | <p>26299   NR   3227 participants with events</p>      | <p>Hazard ratio of a major cardiovascular event for patients achieving a non-HDL-C of &lt;130 mg/dL and LDL-C of &gt;100 mg/dL compared to patients achieving a non-HDL-C of &lt;130</p> |                                                                                                                                                                                                                                         |                                                                                                                                                                                                                                                                                                                                   |

|  |  |  |  |  |  |  |  |                                    |                                                                      |                                            |                                                                                                                                                         |
|--|--|--|--|--|--|--|--|------------------------------------|----------------------------------------------------------------------|--------------------------------------------|---------------------------------------------------------------------------------------------------------------------------------------------------------|
|  |  |  |  |  |  |  |  |                                    | mg/dL and LDL-C of <100 mg/dL on statins 1.01 (0.92 to 1.12), p=0.85 |                                            |                                                                                                                                                         |
|  |  |  |  |  |  |  |  | Major coronary events <sup>4</sup> | 8                                                                    | 38153   NR   4583 participants with events | The increase in hazard ratio for a major coronary event per 1-SD (32 mg/dL) increase in LDL-C in statin-treated arms 1.14 (1.10 to 1.18), p<0.001       |
|  |  |  |  |  |  |  |  | Fatal and non-fatal stroke         | 8                                                                    | 38153   NR   1029                          | The increase in hazard ratio for a major cerebrovascular event per 1-SD (32 mg/dL) increase in LDL-C in statin-treated arms 1.10 (1.02 to 1.17), p=0.01 |

|                          |       |                      |                                                                                                                                                                                                                                                                                                                                                    |                      |     |       |                                |                     |                     |                                                                                                                                                                        |                                                                                                                                                                                                                                                                                |                                                                                                                                                                                                |
|--------------------------|-------|----------------------|----------------------------------------------------------------------------------------------------------------------------------------------------------------------------------------------------------------------------------------------------------------------------------------------------------------------------------------------------|----------------------|-----|-------|--------------------------------|---------------------|---------------------|------------------------------------------------------------------------------------------------------------------------------------------------------------------------|--------------------------------------------------------------------------------------------------------------------------------------------------------------------------------------------------------------------------------------------------------------------------------|------------------------------------------------------------------------------------------------------------------------------------------------------------------------------------------------|
| Briel 2009 <sup>29</sup> | SRM A | Hypercholesterolemia | atorvastatin<br>fluvastatin<br>lovastatin<br>pravastatin<br>simvastatin<br>bezafibrate<br>fenofibrate<br>gemfibrozil<br>cholestyramine<br>niacin (+ statin, fibrate, or resin)<br>ezetimibe<br>pactimibe<br>probucol<br>omega-3 FAs<br>pioglitazone<br>rosiglitazone<br>estrogen + progestin<br>raloxifene<br>torcetrapib<br>diet<br>bowel surgery | Industry; government | RCT | LDL-C | CHD mortality and non-fatal MI | 95                  | 288260   NR   18324 | The slope of the log relative risk of CHD death or non-fatal MI per 10 mg/dL elevation in LDL-C in a univariable model: 4.9 (3.4 to 6.5), p<0.001; R <sup>2</sup> 0.32 | “We found a statistically significant, substantial association between change in low density lipoprotein cholesterol and risk ratios for coronary heart disease events, coronary heart disease deaths, or total deaths, adjusted for other lipid subfractions and drug class.” | Across about 100 RCTs, changes in LDL-C were significantly positively correlated with risk of CHD death, all-cause mortality, and CHD death + non-fatal MI even when adjusting for HDL levels. |
|                          |       |                      |                                                                                                                                                                                                                                                                                                                                                    |                      |     |       |                                | All-cause mortality | 107                 | 298472   NR   NR                                                                                                                                                       |                                                                                                                                                                                                                                                                                |                                                                                                                                                                                                |



|  |  |  |  |  |  |  |  |  |  |                                                                                                                                                                                                                                                                                                                                                                                                                                                               |  |  |
|--|--|--|--|--|--|--|--|--|--|---------------------------------------------------------------------------------------------------------------------------------------------------------------------------------------------------------------------------------------------------------------------------------------------------------------------------------------------------------------------------------------------------------------------------------------------------------------|--|--|
|  |  |  |  |  |  |  |  |  |  | <p>of total death per 10 mg/dL elevation in LDL-C in a univariable model: 2.8 (1.4 to 4.3), <math>p &lt; 0.001</math>; <math>R^2</math> 0.12</p> <p>In a bivariable model accounting for other lipoprotein subfractions: 3.1 (1.7 to 4.6), <math>p &lt; 0.001</math>; <math>R^2</math> 0.15</p> <p>In a multivariable model accounting for other lipoprotein subfractions and drug class: 4.4 (1.6 to 7.2), <math>p = 0.002</math>; <math>R^2</math> 0.28</p> |  |  |
|--|--|--|--|--|--|--|--|--|--|---------------------------------------------------------------------------------------------------------------------------------------------------------------------------------------------------------------------------------------------------------------------------------------------------------------------------------------------------------------------------------------------------------------------------------------------------------------|--|--|

|                            |       |                           |                             |              |     |       |                     |    |                   |                                                                                                                                                                                                                                                                                                                                                                                                                                                                                                 |                                                      |                                             |
|----------------------------|-------|---------------------------|-----------------------------|--------------|-----|-------|---------------------|----|-------------------|-------------------------------------------------------------------------------------------------------------------------------------------------------------------------------------------------------------------------------------------------------------------------------------------------------------------------------------------------------------------------------------------------------------------------------------------------------------------------------------------------|------------------------------------------------------|---------------------------------------------|
|                            |       |                           |                             |              |     |       | CHD mortality       | 94 | 295307   NR   NR  | <p>The slope of the log relative risk of CHD death per 10 mg/dL elevation in LDL-C in a univariable model: 4.5 (2.4 to 6.6), <math>p &lt; 0.001</math>; <math>R^2</math> 0.16</p> <p>In a bivariable model accounting for other lipoprotein subfractions: 4.8 (2.6 to 7.0), <math>p &lt; 0.001</math>; <math>R^2</math> 0.17</p> <p>In a multivariable model accounting for other lipoprotein subfractions and drug class: 7.2 (3.1 to 11.3), <math>p = 0.001</math>; <math>R^2</math> 0.33</p> |                                                      |                                             |
| Johnson 2009 <sup>27</sup> | SRM A | Statin-treated population | atorvastatin<br>fluvastatin | Not reported | RCT | LDL-C | All-cause mortality | 16 | 87642   NA   8067 | For a 1.0 mmol/L greater decrease in                                                                                                                                                                                                                                                                                                                                                                                                                                                            | "We show that an overall survival gain could only be | Access 16 RCTs, greater reductions in LDL-C |

|                            |       |                                              |                                                                          |                                    |     |       |                    |    |                    |                                                                                                                                                                                                                 |                                                                                                                                                                                                                                      |                                                                                                     |
|----------------------------|-------|----------------------------------------------|--------------------------------------------------------------------------|------------------------------------|-----|-------|--------------------|----|--------------------|-----------------------------------------------------------------------------------------------------------------------------------------------------------------------------------------------------------------|--------------------------------------------------------------------------------------------------------------------------------------------------------------------------------------------------------------------------------------|-----------------------------------------------------------------------------------------------------|
|                            |       |                                              | lovastatin<br>pravastatin<br>simvastatin                                 |                                    |     |       |                    |    |                    | LDL-C between treatment and control arms, relative risk reduction of all-cause mortality 0.115, R <sup>2</sup> 0.41; Regression coefficient 0.342 (0.125 to 0.560), p=0.004                                     | predicted with LDL-cholesterol differences >1.5 mmol/L and a cardiovascular survival gain with LDL-cholesterol differences >1.4 mmol/L. These cutoffs could function as benchmarks for evaluating and planning future statin trials” | between trial arms was associated with improved all-cause and cardiovascular mortality.             |
|                            |       |                                              |                                                                          |                                    |     |       | CV mortality       |    | 87642   NA   4592  | For a 1.0 mmol/L greater decrease in LDL-C between treatment and control arms, relative risk reduction of CV mortality 0.174; Regression coefficient 0.370 (0.125 to 0.616), p=0.006<br><br>R <sup>2</sup> 0.39 |                                                                                                                                                                                                                                      |                                                                                                     |
| Delahoy 2009 <sup>30</sup> | SRM A | Participants in triglyceride-lowering trials | atorvastatin<br>fluvastatin<br>lovastatin<br>pravastatin<br>rosuvastatin | None; industry competing interests | RCT | LDL-C | Vascular mortality | 25 | 155613   NA   6321 | Decrease in log relative risk between the treatment versus control arms for every 25 mg/dL greater                                                                                                              | “Based on meta-regression analysis of these trials, there was a significant positive relationship                                                                                                                                    | Across 25 RCTs investigating statin therapy, greater decreases in LDL-C at 1 year between arms were |

|  |  |  |             |  |  |  |                                    |                     |                                                                                                                                                                                                   |                                                                                                |                                                                                        |                                                   |
|--|--|--|-------------|--|--|--|------------------------------------|---------------------|---------------------------------------------------------------------------------------------------------------------------------------------------------------------------------------------------|------------------------------------------------------------------------------------------------|----------------------------------------------------------------------------------------|---------------------------------------------------|
|  |  |  | simvastatin |  |  |  |                                    |                     |                                                                                                                                                                                                   | reduction in serum LDL-C between those arms at 1 year 0.89 (0.87 to 0.92); R <sup>2</sup> 0.75 | between reduction in LDL-C and reduction in the risk for major cardiovascular events.” | associated with improved cardiovascular outcomes. |
|  |  |  |             |  |  |  | Major coronary events <sup>6</sup> | 155613   NA   11357 | Decrease in log relative risk between the treatment versus control arms for every 25 mg/dL greater reduction in serum LDL-C between those arms at 1 year 0.84 (0.82 to 0.86); R <sup>2</sup> 0.87 |                                                                                                |                                                                                        |                                                   |
|  |  |  |             |  |  |  | Major vascular events <sup>7</sup> | 155613   NA   23791 | Decrease in log relative risk between the treatment versus control arms for every 25 mg/dL greater reduction in serum LDL-C between those arms at 1 year 0.86 (0.84 to 0.88); R <sup>2</sup> 0.84 |                                                                                                |                                                                                        |                                                   |

|                              |       |  |                                                                         |    |     |       |                              |    |                    |                                                                                                                                                                                                                     |                                                                                                                                                                                                                                                                                                               |                                                                                                                                                                                                                                                                                                         |
|------------------------------|-------|--|-------------------------------------------------------------------------|----|-----|-------|------------------------------|----|--------------------|---------------------------------------------------------------------------------------------------------------------------------------------------------------------------------------------------------------------|---------------------------------------------------------------------------------------------------------------------------------------------------------------------------------------------------------------------------------------------------------------------------------------------------------------|---------------------------------------------------------------------------------------------------------------------------------------------------------------------------------------------------------------------------------------------------------------------------------------------------------|
|                              |       |  |                                                                         |    |     |       | Fatal and non-fatal stroke   |    | 155613   NA   4717 | Decrease in log relative risk between the treatment versus control arms for every 25 mg/dL greater reduction in serum LDL-C between those arms at 1 year 0.90 (0.86 to 0.94); R <sup>2</sup> 0.47                   |                                                                                                                                                                                                                                                                                                               |                                                                                                                                                                                                                                                                                                         |
| Razzolini 2008 <sup>34</sup> | SRM A |  | atorvastatin<br>fluvastatin<br>lovastatin<br>pravastatin<br>simvastatin | NR | RCT | LDL-C | All-cause mortality          | 29 | 90480   NA   NR    | <p>Pearson's correlation coefficient between LDL-C at the end of the study period and annualized all-cause mortality in the treatment groups - 0.4678, p=0.0105;</p> <p>In the control groups - 0.3462, p=0.061</p> | <p>"A trend of increased non-cardiovascular mortality with decreased LDL exists both in placebo and treatment groups. However, at each given LDL cholesterol level, non-cardiovascular mortality is lower in treated patients. Therefore, statin therapy may improve the biological impact of LDL on non-</p> | <p>Across 29 RCTs investigating statins, decreasing LDL -C at the trial end was associated with increases in both all-cause mortality and non-cardiovascular mortality. However, at all LDL-C levels, all-cause and non-cardiovascular mortality were lower in the treatment versus control groups.</p> |
|                              |       |  |                                                                         |    |     |       | Non-cardiovascular mortality |    |                    | <p>Pearson's correlation coefficient between LDL-C at the end of the study period</p>                                                                                                                               |                                                                                                                                                                                                                                                                                                               |                                                                                                                                                                                                                                                                                                         |

|                            |       |                                              |                                                                         |    |     |       |                     |    |                   |                                                                                                                                                                          |                                                                                                                                                                                                                                                                                                                                                |                                                                                                                                                                                                                           |
|----------------------------|-------|----------------------------------------------|-------------------------------------------------------------------------|----|-----|-------|---------------------|----|-------------------|--------------------------------------------------------------------------------------------------------------------------------------------------------------------------|------------------------------------------------------------------------------------------------------------------------------------------------------------------------------------------------------------------------------------------------------------------------------------------------------------------------------------------------|---------------------------------------------------------------------------------------------------------------------------------------------------------------------------------------------------------------------------|
|                            |       |                                              |                                                                         |    |     |       |                     |    |                   | and annualized non-cardiovascular mortality in the treatment groups - 0.4471, p=0.0171;<br><br>In the control groups - 0.5292, p=0.0032                                  | cardiovascular mortality”                                                                                                                                                                                                                                                                                                                      |                                                                                                                                                                                                                           |
| Baigent 2005 <sup>26</sup> | SRM A | Participants in triglyceride-lowering trials | atorvastatin<br>fluvastatin<br>lovastatin<br>pravastatin<br>simvastatin | NR | RCT | LDL-C | All-cause mortality | 14 | 90056   NR   8186 | For a 1 mmol/L reduction in LDL-C at 1 year in the treatment versus control arms, relative rate ratio for all-cause mortality at study end 0.88 (0.84 to 0.91), p<0.0001 | “The results of the present meta-analysis indicate that the proportional reductions in the incidence of major coronary events, coronary revascularizations, and strokes were approximately related to the absolute reductions in LDL cholesterol achieved with the statin regimens studied, and that the proportional reductions in such major | Across 14 RCTs investigating statin therapy, greater reductions in LDL-C at 1 year were associated with improved all-cause and vascular mortality, as well as decreased rates of strokes and coronary revascularizations. |
|                            |       |                                              |                                                                         |    |     |       | Cancer              |    | 79751   NR   5103 | For a 1 mmol/L reduction in LDL-C at 1 year in the treatment versus control arms, relative rate ratio for all-cause mortality at study end                               |                                                                                                                                                                                                                                                                                                                                                |                                                                                                                                                                                                                           |

|  |  |  |  |  |  |  |                                     |                   |                                                                                                                                                                         |                                                                                                                                                                                                                            |
|--|--|--|--|--|--|--|-------------------------------------|-------------------|-------------------------------------------------------------------------------------------------------------------------------------------------------------------------|----------------------------------------------------------------------------------------------------------------------------------------------------------------------------------------------------------------------------|
|  |  |  |  |  |  |  |                                     |                   | 1.00 (0.95 to 1.06), p=0.9                                                                                                                                              | vascular events per mmol/L LDL cholesterol reduction were similar irrespective of the pretreatment cholesterol concentrations or other characteristics (eg, age, sex, or pre-existing disease) of the study participants.” |
|  |  |  |  |  |  |  | Vascular mortality <sup>8</sup>     | 90056   NR   4655 | For a 1 mmol/L reduction in LDL-C at 1 year in the treatment versus control arms, relative rate ratio for vascular mortality at study end 0.83 (0.79 to 0.87)           |                                                                                                                                                                                                                            |
|  |  |  |  |  |  |  | Non-vascular mortality <sup>9</sup> | 90056   NR   3531 | For a 1 mmol/L reduction in LDL-C at 1 year in the treatment versus control arms, relative rate ratio for non-vascular mortality at study end 0.95 (0.90 to 1.01) p=0.1 |                                                                                                                                                                                                                            |
|  |  |  |  |  |  |  | CHD mortality                       | 90056   NR   3508 | For a 1 mmol/L reduction in LDL-C at 1 year in the treatment versus control arms, relative rate ratio for CHD mortality at                                              |                                                                                                                                                                                                                            |

|  |  |  |  |  |  |  |                                                 |                                                            |                                                                                                                                                                                                                             |  |  |
|--|--|--|--|--|--|--|-------------------------------------------------|------------------------------------------------------------|-----------------------------------------------------------------------------------------------------------------------------------------------------------------------------------------------------------------------------|--|--|
|  |  |  |  |  |  |  |                                                 |                                                            | study end<br>0.81 (0.76 to<br>0.85),<br>p<0.0001                                                                                                                                                                            |  |  |
|  |  |  |  |  |  |  | Major<br>coronary<br>event <sup>10</sup>        | 90056  <br>NR  <br>7757<br>participa<br>nts with<br>event  | For a 1<br>mmol/L<br>reduction in<br>LDL-C at 1<br>year in the<br>treatment<br>versus<br>control arms,<br>relative rate<br>ratio for a<br>major<br>coronary<br>event at<br>study end<br>0.77 (0.74 to<br>0.80),<br>p<0.0001 |  |  |
|  |  |  |  |  |  |  | Major vascular<br>event                         | 90056  <br>NR  <br>14348<br>participa<br>nts with<br>event | For a 1<br>mmol/L<br>reduction in<br>LDL-C at 1<br>year in the<br>treatment<br>versus<br>control arms,<br>relative rate<br>ratio for a<br>major<br>vascular<br>event at<br>study end<br>0.79 (0.77 to<br>0.81),<br>p<0.0001 |  |  |
|  |  |  |  |  |  |  | Coronary<br>revascularizati<br>on <sup>11</sup> | 90056  <br>NR  <br>6054<br>participa                       | For a 1<br>mmol/L<br>reduction in<br>LDL-C at 1<br>year in the                                                                                                                                                              |  |  |



|  |  |  |  |  |  |  |                           |   |                                           |                                                                                                                                                                 |  |  |
|--|--|--|--|--|--|--|---------------------------|---|-------------------------------------------|-----------------------------------------------------------------------------------------------------------------------------------------------------------------|--|--|
|  |  |  |  |  |  |  |                           |   | nts with event                            | treatment versus control arms, relative rate ratio for coronary revascularization at study end 0.76 (0.73 to 0.80), p<0.0001                                    |  |  |
|  |  |  |  |  |  |  | Fatal or non-fatal stroke | 9 | 65138   NR   2957 participants with event | For a 1 mmol/L reduction in LDL-C at 1 year in the treatment versus control arms, relative rate ratio for any stroke at study end 0.83 (0.78 to 0.88), p<0.0001 |  |  |

LDL-C: Low-density lipoprotein cholesterol; MACE: Major adverse cardiovascular event; MI: Myocardial infarction

- 1: Defined by each study, but often including stroke, coronary heart disease-related death, myocardial infarction, coronary revascularization; sometimes as all-cause mortality, any acute coronary syndrome
- 2: Defined by each study, but most often coronary heart disease-related death, myocardial infarction; sometimes as coronary revascularization, stroke, angina, or acute coronary syndrome
- 3: MI, cardiac death, hospitalization for unstable angina, or fatal or non-fatal stroke
- 4: MI, cardiac death, or hospitalization for unstable angina
- 5: This study is an update of Baigent et al., 2005
- 6: Non-fatal MI, CHD death
- 7: Non-fatal MI, CHD death, coronary revascularization, fatal and non-fatal stroke
- 8: CHD death, stroke, other vascular

9: Cancer, respiratory-, trauma-related, or other

10: Non-fatal MI, CHD death

11: CABG, PTCA, unspecified

12: Defined as CHD death, non-fatal MI, ischemic stroke, or diagnosis of unstable angina

**eTable 9. Hyperphosphatemia**

| Author,<br>Year | Study<br>design | Indication | Interventions | Funding<br>source | Design<br>of<br>include<br>d<br>studies | Surrogate<br>marker | Clinical<br>outcome | No.<br>studie<br>s | Overall<br>sample<br>size   No.<br>surrogat<br>e<br>measure | Evidence | Author's<br>conclusion | Plaintext<br>Summary |
|-----------------|-----------------|------------|---------------|-------------------|-----------------------------------------|---------------------|---------------------|--------------------|-------------------------------------------------------------|----------|------------------------|----------------------|
|-----------------|-----------------|------------|---------------|-------------------|-----------------------------------------|---------------------|---------------------|--------------------|-------------------------------------------------------------|----------|------------------------|----------------------|

|                           |       |                                                    |                                                                    |            |           |                            |                          |    | s   No. clinical outcomes |                                                                                                                                                                                                                         |                                                                                                                                                                                                                                                                                                                                                                                      |                                                                                                                                                                                                                                      |
|---------------------------|-------|----------------------------------------------------|--------------------------------------------------------------------|------------|-----------|----------------------------|--------------------------|----|---------------------------|-------------------------------------------------------------------------------------------------------------------------------------------------------------------------------------------------------------------------|--------------------------------------------------------------------------------------------------------------------------------------------------------------------------------------------------------------------------------------------------------------------------------------------------------------------------------------------------------------------------------------|--------------------------------------------------------------------------------------------------------------------------------------------------------------------------------------------------------------------------------------|
| Palmer 2015 <sup>37</sup> | SRM A | Hyperphosphatemia in CKD treated with hemodialysis | Bisphosphonates;<br>cinacalcet;<br>phosphate binders;<br>vitamin D | Government | RCTs only | Change in serum phosphorus | All-cause mortality      | 12 | < 5504   NR   NR          | Pearson's correlation coefficient of the log ratio of mean serum phosphorus between treatment arms at trial end and the log relative risk of all-cause mortality between those treatment arms: 0.23 (-0.48 to 0.69)     | "We found that the effects of a broad range of drugs used widely in CKD to correct perturbed serum PTH, phosphorus, and calcium levels generally do not correlate with cardiovascular and all-cause mortality in randomized trials, although the effects of these drugs in standard clinical practice are universally measured based on improvements in levels of such biomarkers. " | Across several trials, in those with CKD undergoing hemodialysis, greater improvement of serum phosphorus in treatment groups versus the control arms was not associated with improvements in all-cause or cardiovascular mortality. |
|                           |       |                                                    |                                                                    |            |           |                            | Cardiovascular mortality | 4  | < 3329   NR   NR          | Pearson's correlation coefficient of the log ratio of mean serum phosphorus between treatment arms at trial end and the log relative risk of cardiovascular mortality between those treatment arms: 0.54 (-0.98 to 1.0) |                                                                                                                                                                                                                                                                                                                                                                                      |                                                                                                                                                                                                                                      |

| eTable 10. Hypertension |              |            |               |                |                            |                  |                  |             |                                                    |          |                     |                   |
|-------------------------|--------------|------------|---------------|----------------|----------------------------|------------------|------------------|-------------|----------------------------------------------------|----------|---------------------|-------------------|
| Author, Year            | Study design | Indication | Interventions | Funding source | Design of included studies | Surrogate marker | Clinical outcome | No. studies | Overall sample size   No. surrogate measures   No. | Evidence | Author's conclusion | Plaintext Summary |
|                         |              |            |               |                |                            |                  |                  |             |                                                    |          |                     |                   |

|                                                                                   |                 |                                                                 |                                                                                                                                                                                       |                            |     |                         |                              |    | clinical<br>outcomes |                                                                                                                                                                                                                                                                                                                                                                                                                                     |                                                                                                                                                                                                                                                                                                                                                                                                                                                                                                                                                                                 |                                                                                                                                                                                                                     |
|-----------------------------------------------------------------------------------|-----------------|-----------------------------------------------------------------|---------------------------------------------------------------------------------------------------------------------------------------------------------------------------------------|----------------------------|-----|-------------------------|------------------------------|----|----------------------|-------------------------------------------------------------------------------------------------------------------------------------------------------------------------------------------------------------------------------------------------------------------------------------------------------------------------------------------------------------------------------------------------------------------------------------|---------------------------------------------------------------------------------------------------------------------------------------------------------------------------------------------------------------------------------------------------------------------------------------------------------------------------------------------------------------------------------------------------------------------------------------------------------------------------------------------------------------------------------------------------------------------------------|---------------------------------------------------------------------------------------------------------------------------------------------------------------------------------------------------------------------|
| The Blood Pressure Lowering Treatment Trialists' Collaboration 2021 <sup>38</sup> | IPD<br>SRM<br>A | Patients in blood pressure reduction trials without baseline HF | ACE inhibitors<br>ACE inhibitor + CCB<br>ARBs<br>ARB + CCB<br>ARB + diuretic<br>alpha blockers<br>beta blockers<br>beta blocker + CCB<br>beta blocker + diuretic<br>CCBs<br>diuretics | Government; not for profit | RCT | Systolic blood pressure | Major CV events <sup>1</sup> | 48 | 342426   NA   42324  | <p>In participants without baseline CV disease, for a 5 mm Hg reduction in systolic blood pressure at the end of follow up, hazard ratio of a major CV event between intervention and control 0.91 (0.89 to 0.94)</p> <p>In those with baseline CV disease: 0.89 (0.86 to 0.92)</p> <p>There was an association between a greater reduction in systolic blood pressure between treatment and control and decreased hazard ratio</p> | <p>"In this largest source of randomised evidence of blood pressure-lowering effects on cardiovascular disease and death, we found the proportional effects of blood pressure-lowering on cardiovascular outcomes to be similar in people with or without previous cardiovascular disease and across categories of baseline systolic blood pressure down to less than 120 mm Hg. On average, a 5 mm Hg reduction of systolic blood pressure reduced the risk of a major cardiovascular event by about 10%; the corresponding proportional risk reductions for stroke, heart</p> | <p>Across 48 RCTs, greater reductions in systolic BP were associated with decreased incidence of major cardiovascular events, including all strokes, CHD, and heart failure, regardless of baseline CV disease.</p> |

|  |  |  |  |  |  |  |  |  |  |                                    |                                                                                                      |                     |                                                                                                                                                                                                                                                                                         |
|--|--|--|--|--|--|--|--|--|--|------------------------------------|------------------------------------------------------------------------------------------------------|---------------------|-----------------------------------------------------------------------------------------------------------------------------------------------------------------------------------------------------------------------------------------------------------------------------------------|
|  |  |  |  |  |  |  |  |  |  | of major CV events (no data shown) | failure, ischaemic heart disease, and cardiovascular death were 13%, 13%, 8%, and 5%, respectively.” |                     |                                                                                                                                                                                                                                                                                         |
|  |  |  |  |  |  |  |  |  |  | Fatal or non-fatal stroke          | 48                                                                                                   | 343544   NA   13772 | In participants without baseline CV disease, for a 5 mm Hg reduction in systolic blood pressure at the end of follow up, hazard ratio of a fatal or non-fatal stroke between intervention and control 0.85 (0.80 to 0.90)<br><br>In those with baseline CV disease: 0.89 (0.85 to 0.94) |
|  |  |  |  |  |  |  |  |  |  | Ischemic heart disease             | 48                                                                                                   | 343360   NA   19452 | In participants without baseline CV disease, for a 5 mm Hg reduction in systolic blood pressure at the end of follow up, hazard ratio                                                                                                                                                   |

|  |  |  |  |  |  |  |                                     |    |                    |                                                                                                                                                                                                                                                                                                 |  |  |
|--|--|--|--|--|--|--|-------------------------------------|----|--------------------|-------------------------------------------------------------------------------------------------------------------------------------------------------------------------------------------------------------------------------------------------------------------------------------------------|--|--|
|  |  |  |  |  |  |  |                                     |    |                    | of ischemic heart disease between intervention and control 0.95 (0.91 to 0.99)<br><br>In those with baseline CV disease: 0.90 (0.86 to 0.95)                                                                                                                                                    |  |  |
|  |  |  |  |  |  |  | HF causing hospitalization or death | 43 | 313971   NA   7833 | In participants without baseline CV disease, for a 5 mm Hg reduction in systolic blood pressure at the end of follow up, hazard ratio of HF causing hospitalization or death between intervention and control 0.83 (0.77 to 0.89)<br><br>In those with baseline CV disease: 0.89 (0.83 to 0.95) |  |  |

|  |  |  |  |  |  |  |  |                     |    |                           |                                                                                                                                                                                                                                                                          |  |  |
|--|--|--|--|--|--|--|--|---------------------|----|---------------------------|--------------------------------------------------------------------------------------------------------------------------------------------------------------------------------------------------------------------------------------------------------------------------|--|--|
|  |  |  |  |  |  |  |  | CV mortality        | 44 | 319914  <br>NA  <br>10935 | In participants without baseline CV disease, for a 5 mm Hg reduction in systolic blood pressure at the end of follow up, hazard ratio of CV mortality between intervention and control 0.93 (0.88 to 0.98)<br><br>In those with baseline CV disease: 0.98 (0.92 to 1.04) |  |  |
|  |  |  |  |  |  |  |  | All-cause mortality | 48 | 343603  <br>NA  <br>28895 | In participants without baseline CV disease, for a 5 mm Hg reduction in systolic blood pressure at the end of follow up, hazard ratio of all-cause mortality between intervention and control                                                                            |  |  |



|                             |       |                                                          |                                                                                                                                                                                        |            |                        |                         |                               |    |                   |                                                                                                          |                                                                                                                                                                                                                              |                                                                                                                                                                                                                                                                    |
|-----------------------------|-------|----------------------------------------------------------|----------------------------------------------------------------------------------------------------------------------------------------------------------------------------------------|------------|------------------------|-------------------------|-------------------------------|----|-------------------|----------------------------------------------------------------------------------------------------------|------------------------------------------------------------------------------------------------------------------------------------------------------------------------------------------------------------------------------|--------------------------------------------------------------------------------------------------------------------------------------------------------------------------------------------------------------------------------------------------------------------|
|                             |       |                                                          |                                                                                                                                                                                        |            |                        |                         |                               |    |                   | 0.98 (0.95 to 1.02)<br>In those with baseline CV disease: 0.97 (0.94 to 1.01)                            |                                                                                                                                                                                                                              |                                                                                                                                                                                                                                                                    |
| Katsanos 2017 <sup>41</sup> | SRM A | Secondary stroke prevention after ischemic stroke or TIA | Guanethidine<br>deserpidine/methylothiazide<br>atenolol<br>ramipril<br>perindopril/indapamide<br>nicardipine<br>nitrendipine<br>candesartan<br>eprosartan<br>telmisartan<br>indapamide | Government | RCT, PROBE, open-label | Systolic blood pressure | Recurrent stroke <sup>2</sup> | 11 | 37835   NA   3578 | Regression coefficient for achieved SBP and log odds of recurrent stroke 0.02 (0.01 to 0.04), p=0.049    | “Our systematic review and metaregression analysis showed that the extent of both SBP and DBP reduction is linearly associated with the magnitude of risk reduction in recurrent cerebrovascular and cardiovascular events.” | Across several RCTs in patients with prior ischemic strokes or TIAs, greater reductions in systolic and diastolic blood pressures are associated with improvements in several clinical outcomes including recurrent stroke, MI, all-cause mortality, and CV death. |
|                             |       |                                                          |                                                                                                                                                                                        |            |                        |                         | MI                            | 5  | 29129   NA   564  | Regression coefficient for achieved SBP and log odds of MI 0.022 (0.002 to 0.041), p=0.024               |                                                                                                                                                                                                                              |                                                                                                                                                                                                                                                                    |
|                             |       |                                                          |                                                                                                                                                                                        |            |                        |                         | All-cause mortality           | 8  | 36364   NA   2864 | Regression coefficient for achieved SBP and log odds of all-cause mortality 0.02 (0.01 to 0.03), p=0.001 |                                                                                                                                                                                                                              |                                                                                                                                                                                                                                                                    |
|                             |       |                                                          |                                                                                                                                                                                        |            |                        |                         | CV mortality                  | 8  | 36364   NA   1337 | Regression coefficient for achieved SBP and log odds of CV                                               |                                                                                                                                                                                                                              |                                                                                                                                                                                                                                                                    |

|                            |       |                                             |                                                     |                        |     |                          |                                         |    |                     |                                                                                                                    |                                                                                             |                                                                             |
|----------------------------|-------|---------------------------------------------|-----------------------------------------------------|------------------------|-----|--------------------------|-----------------------------------------|----|---------------------|--------------------------------------------------------------------------------------------------------------------|---------------------------------------------------------------------------------------------|-----------------------------------------------------------------------------|
|                            |       |                                             |                                                     |                        |     |                          |                                         |    |                     | death 0.05 (0.03 to 0.07), p<0.001                                                                                 |                                                                                             |                                                                             |
|                            |       |                                             |                                                     |                        |     |                          | Disabling or fatal stroke               | 7  | 14250   NA   493    | Regression coefficient for achieved SBP and log odds of disabling or fatal stroke 0.001 (-0.024 to 0.022), p=0.944 |                                                                                             |                                                                             |
|                            |       |                                             |                                                     |                        |     | Diastolic blood pressure | Recurrent stroke                        | 11 | 37835   NA   3578   | Regression coefficient for achieved DBP and log odds of recurrent stroke 0.08 (0.01 to 0.15), p=0.026              |                                                                                             |                                                                             |
|                            |       |                                             |                                                     |                        |     |                          | All-cause mortality                     | 8  | 36364   NA   2854   | Regression coefficient for achieved DBP and log odds of all-cause mortality 0.08 (0.02 to 0.13), p=0.009           |                                                                                             |                                                                             |
| Ettehad 2016 <sup>40</sup> | SRM A | Patients in blood pressure reduction trials | captopril<br>enalapril<br>fosinopril<br>perindopril | Government; University | RCT | Systolic blood pressure  | Fatal and non-fatal stroke <sup>4</sup> | 54 | 265323   NA   10013 | Statistical significance for a greater change in systolic blood pressure between                                   | "In this meta-analysis, blood pressure lowering treatment significantly reduced the risk of | Across many RCTs, greater reductions in systolic BP at the end of trial was |

|  |  |  |                                                                                                                                                                                                                                                                                                                                                                                                                                                                                                |  |  |                                          |    |                     |                                                                                                                                                                                                                                                                                           |                                                                                                                                                                                                                                                                                                                                                                                                                               |                                                                                                                                                                                                                                                                      |
|--|--|--|------------------------------------------------------------------------------------------------------------------------------------------------------------------------------------------------------------------------------------------------------------------------------------------------------------------------------------------------------------------------------------------------------------------------------------------------------------------------------------------------|--|--|------------------------------------------|----|---------------------|-------------------------------------------------------------------------------------------------------------------------------------------------------------------------------------------------------------------------------------------------------------------------------------------|-------------------------------------------------------------------------------------------------------------------------------------------------------------------------------------------------------------------------------------------------------------------------------------------------------------------------------------------------------------------------------------------------------------------------------|----------------------------------------------------------------------------------------------------------------------------------------------------------------------------------------------------------------------------------------------------------------------|
|  |  |  | <p>quinapril</p> <p>ramipril</p> <p>trandolapril</p> <p>methyldopa</p> <p>candesartan</p> <p>irbesartan</p> <p>losartan</p> <p>olmesartan</p> <p>telmisartan</p> <p>valsartan</p> <p>acebutolol</p> <p>atenolol</p> <p>bucindolol</p> <p>metoprolol</p> <p>nebivolol</p> <p>oxprenolol</p> <p>practolol</p> <p>propranolol</p> <p>timolol</p> <p>bendrofluazide</p> <p>chlorthalidone</p> <p>Co-Amilozide</p> <p>hydrochlorothiazide</p> <p>triamterene</p> <p>amlodipine</p> <p>diltiazem</p> |  |  |                                          |    |                     | <p>treatment and control and the relative risk of fatal and non-fatal stroke p&lt;0.0001</p> <p>For a 10mmHg reduction in SBP, the relative risk of stroke 0.73 (0.68 to 0.77)</p>                                                                                                        | <p>cardiovascular disease and death in various populations of patients. Overall, a 10 mm Hg reduction in systolic blood pressure reduced the risk of major cardiovascular disease events by 20%, coronary heart disease by 17%, stroke by 27%, heart failure by 28%, and all-cause mortality by 13%...with similar proportional reductions across various population subgroups, irrespective of starting blood pressure."</p> | <p>associated with improved cardiovascular outcomes including stroke, a composite of MI and sudden cardiac death, and HF, though was not associated with improved risk of renal failure, irrespective of baseline blood pressure and cardiovascular comorbidity.</p> |
|  |  |  |                                                                                                                                                                                                                                                                                                                                                                                                                                                                                                |  |  | Major cardiovascular events <sup>5</sup> | 55 | 265578   NA   27277 | <p>Statistical significance for a greater change in systolic blood pressure between treatment and control and the relative risk of major cardiovascular events p&lt;0.0001</p> <p>For a 10mmHg reduction in SBP, the relative risk of major cardiovascular events 0.80 (0.77 to 0.83)</p> |                                                                                                                                                                                                                                                                                                                                                                                                                               |                                                                                                                                                                                                                                                                      |

|  |  |  |                                                                                                                                                                                               |  |  |  |                     |    |                           |                                                                                                                                                                                                                                            |  |  |
|--|--|--|-----------------------------------------------------------------------------------------------------------------------------------------------------------------------------------------------|--|--|--|---------------------|----|---------------------------|--------------------------------------------------------------------------------------------------------------------------------------------------------------------------------------------------------------------------------------------|--|--|
|  |  |  | felodipine<br>mibefradil<br>benidipine<br>isradipine<br>lacidipine<br>nifedipine<br>nitrendipine<br>bendrofluazide<br>α-Methyldopa<br>various combinations<br>strict or non-strict BP control |  |  |  | HF <sup>6</sup>     | 43 | 222851  <br>NA  <br>7044  | Statistical significance for a greater change in systolic blood pressure between treatment and control and the relative risk of HF p<0.0001<br><br>For a 10mmHg reduction in SBP, the relative risk of HF 0.72 (0.67 to 0.78)              |  |  |
|  |  |  |                                                                                                                                                                                               |  |  |  | All-cause mortality | 57 | 267998  <br>NA  <br>19773 | Statistical significance for a greater change in systolic blood pressure between treatment and control and the relative risk of all-cause mortality p=0.014<br><br>For a 10mmHg reduction in SBP, the relative risk of all-cause mortality |  |  |

|  |  |  |  |  |  |  |                  |    |                     |                                                                                                                                                                                                                                       |  |  |
|--|--|--|--|--|--|--|------------------|----|---------------------|---------------------------------------------------------------------------------------------------------------------------------------------------------------------------------------------------------------------------------------|--|--|
|  |  |  |  |  |  |  |                  |    | 0.87 (0.84 to 0.91) |                                                                                                                                                                                                                                       |  |  |
|  |  |  |  |  |  |  | CHD <sup>3</sup> | 56 | 265534   NA   10163 | <p>Statistical significance for a greater change in systolic blood pressure between treatment and control and the relative risk of CHD p=0.058</p> <p>For a 10mmHg reduction in SBP, the relative risk of CHD 0.83 (0.78 to 0.88)</p> |  |  |
|  |  |  |  |  |  |  | Kidney failure   | 16 | 78931   NA   1724   | <p>Statistical significance for a greater change in systolic blood pressure between treatment and control and the relative risk of renal failure p=0.09</p> <p>For a 10mmHg reduction in SBP, the</p>                                 |  |  |

|                            |       |                                             |                                                                                                                                                                                                                                                                                                                                                             |      |                 |                          |                            |    |                   |                                                                                                                                                                                                               |                                                                                                                                                                                                                                                                                                                                                                                                           |                                                                                                                                                                                                                                                                                                                        |
|----------------------------|-------|---------------------------------------------|-------------------------------------------------------------------------------------------------------------------------------------------------------------------------------------------------------------------------------------------------------------------------------------------------------------------------------------------------------------|------|-----------------|--------------------------|----------------------------|----|-------------------|---------------------------------------------------------------------------------------------------------------------------------------------------------------------------------------------------------------|-----------------------------------------------------------------------------------------------------------------------------------------------------------------------------------------------------------------------------------------------------------------------------------------------------------------------------------------------------------------------------------------------------------|------------------------------------------------------------------------------------------------------------------------------------------------------------------------------------------------------------------------------------------------------------------------------------------------------------------------|
|                            |       |                                             |                                                                                                                                                                                                                                                                                                                                                             |      |                 |                          |                            |    |                   | relative risk of renal failure 0.95 (0.84 to 1.07)                                                                                                                                                            |                                                                                                                                                                                                                                                                                                                                                                                                           |                                                                                                                                                                                                                                                                                                                        |
| Lassere 2012 <sup>42</sup> | SRM A | Patients in blood pressure reduction trials | candesartan<br>lisinopril<br>perindopril<br>trandolapril<br>pindolol<br>candesartan<br>telmisartan<br>atenolol<br>oxprenolol<br>propranolol<br>amlodipine<br>nifedipine<br>nitrendipine<br>bendroflumethiazide<br>bendrofluazide<br>chlorothiazide<br>chlorthalidone<br>indapamide<br>amiloride<br>hydrochlorothiazide<br>amiloride/<br>hydrochlorothiazide | None | RCT, open-label | Systolic blood pressure  | Fatal and non-fatal stroke | 17 | 96382   NA   3240 | Regression coefficient for the difference in change of systolic blood pressure between treatment and control and the relative risk reduction of stroke between those arms 0.0196, p<0.01; R <sup>2</sup> 0.37 | “...systolic blood pressure is a Grade B + surrogate endpoint for stroke protection and diastolic blood pressure is a Grade A surrogate endpoint for stroke protection...Our trial-level association for systolic blood pressure may be considered low (R-squared 0.37 assuming no uncertainty). The results for diastolic blood pressure were somewhat better (R-squared 0.58 assuming no uncertainty).” | Across nearly 20 trials, greater decreases in systolic and diastolic blood pressure were associated with lower relative risks of stroke, but not CV or overall mortality. The authors rated systolic and diastolic blood pressure change as a surrogate marker for stroke as a B+ and A using the BSES3, respectively. |
|                            |       |                                             |                                                                                                                                                                                                                                                                                                                                                             |      |                 | Diastolic blood pressure |                            | 18 | 99809   NA   3275 | Regression coefficient for the difference in change of diastolic blood pressure between treatment and control and the relative risk reduction of stroke between those arms 0.0453,                            |                                                                                                                                                                                                                                                                                                                                                                                                           |                                                                                                                                                                                                                                                                                                                        |



|                               |       |                                                     |                                                                   |    |                                 |                          |                               |    |                  |                                                                                                                                                                                                                    |                                                                                         |                                                    |
|-------------------------------|-------|-----------------------------------------------------|-------------------------------------------------------------------|----|---------------------------------|--------------------------|-------------------------------|----|------------------|--------------------------------------------------------------------------------------------------------------------------------------------------------------------------------------------------------------------|-----------------------------------------------------------------------------------------|----------------------------------------------------|
|                               |       |                                                     |                                                                   |    |                                 | Systolic blood pressure  | All-cause mortality           | 17 | 96382   NA   NR  | Regression coefficient for the difference in change of systolic blood pressure between treatment and control and the relative risk reduction of all-cause mortality 0.005, “non-significant;” R <sup>2</sup> 0.06  |                                                                                         |                                                    |
|                               |       |                                                     |                                                                   |    |                                 | Diastolic blood pressure |                               | 18 | 99809   NA   NR  | Regression coefficient for the difference in change of diastolic blood pressure between treatment and control and the relative risk reduction of all-cause mortality 0.005, “non-significant;” R <sup>2</sup> 0.02 |                                                                                         |                                                    |
| Verdecchia 2010 <sup>47</sup> | SRM A | Patients with hypertension or composite features of | ACE inhibitors<br>ACE inhibitor + diuretic<br>ACE inhibitor + CCB | NR | RCT, 1 non-randomized alternate | Systolic blood pressure  | MI, stroke, CHF, and CV death | 30 | 221024   NA   NR | For each 5mmHg greater decrease in systolic blood                                                                                                                                                                  | “BP reduction is important to reduce the risk of CCEP in clinical trials. A significant | Across several RCTs, greater decreases in systolic |



|                                                                                   |       |                                             |                                                                   |      |                  |                          |                                 |    |                                                                                                                                                                             |                                                                                                                                |                                                                                                                                                                                         |                                                                                                                                  |
|-----------------------------------------------------------------------------------|-------|---------------------------------------------|-------------------------------------------------------------------|------|------------------|--------------------------|---------------------------------|----|-----------------------------------------------------------------------------------------------------------------------------------------------------------------------------|--------------------------------------------------------------------------------------------------------------------------------|-----------------------------------------------------------------------------------------------------------------------------------------------------------------------------------------|----------------------------------------------------------------------------------------------------------------------------------|
|                                                                                   |       | high cardiovascular risk                    | ACE inhibitor + ARB<br>CCBs<br>diuretics<br>ARBs<br>beta blockers |      | assignment trial |                          |                                 |    |                                                                                                                                                                             | pressure between the treatment arms, odds ratio of the cardiovascular composite endpoint 0.871 (0.824 to 0.921), p<0.0001      | difference between two treatment groups in the risk of CCEP may be anticipated for a SBP/DBP reduction differing by 4.6/2.2 mmHg or more.”                                              | and diastolic blood pressures between treatment arms was associated with decreased risks of a composite cardiovascular endpoint. |
|                                                                                   |       |                                             |                                                                   |      |                  | Diastolic Blood pressure |                                 |    | For each 2mmHg greater decrease in diastolic blood pressure between the treatment arms, odds ratio of the cardiovascular composite endpoint 0.883 (0.839 to 0.929), p=0.001 |                                                                                                                                |                                                                                                                                                                                         |                                                                                                                                  |
| The Blood Pressure Lowering Treatment Trialists' Collaboration 2014 <sup>39</sup> | SRM A | Patients in blood pressure reduction trials | ACE inhibitors<br>CCBs<br>diuretics                               | None | RCT              | Systolic blood pressure  | 5-year risk of CVD <sup>7</sup> | 11 | 51917   NA   4167                                                                                                                                                           | For a 5mmHg greater reduction in systolic blood pressure between treatment and control, stratified by baseline risk group, the | “In conclusion, this meta-analysis showed that treatment with blood pressure-lowering drugs resulted in similar relative risk reductions irrespective of the baseline level of absolute | Across 11 RCTs, reductions in systolic blood pressure were associated with decreased risk of adverse cardiovascular              |

|  |  |  |  |  |  |                                    |                   |                                                                                                                                                                                                 |  |                                                                                                                                                                                                                                 |                                                                                         |                                                |
|--|--|--|--|--|--|------------------------------------|-------------------|-------------------------------------------------------------------------------------------------------------------------------------------------------------------------------------------------|--|---------------------------------------------------------------------------------------------------------------------------------------------------------------------------------------------------------------------------------|-----------------------------------------------------------------------------------------|------------------------------------------------|
|  |  |  |  |  |  |                                    |                   |                                                                                                                                                                                                 |  | <p>risk ratio of 5-year risk of CVD between those groups:</p> <p>Risk &lt;11%: 0.80 (0.72 to 0.88)</p> <p>Risk 11-15%: 0.89 (0.81 to 0.97)</p> <p>Risk 15-21%: 0.90 (0.84 to 0.97)</p> <p>Risk &gt;21%: 0.89 (0.83 to 0.96)</p> | <p>risk, hence greater absolute risk reduction with higher baseline absolute risk.”</p> | <p>ar events, regardless of baseline risk.</p> |
|  |  |  |  |  |  | 5-year risk of stroke <sup>8</sup> | 51917   NA   1846 | <p>For a 5mmHg greater reduction in systolic blood pressure between treatment and control, stratified by baseline risk group, the risk ratio of 5-year risk of stroke between those groups:</p> |  |                                                                                                                                                                                                                                 |                                                                                         |                                                |

|  |  |  |  |  |  |  |                                 |                   |                                                                                                                                                                                                                                                                           |                                                                                                                                                                         |  |  |
|--|--|--|--|--|--|--|---------------------------------|-------------------|---------------------------------------------------------------------------------------------------------------------------------------------------------------------------------------------------------------------------------------------------------------------------|-------------------------------------------------------------------------------------------------------------------------------------------------------------------------|--|--|
|  |  |  |  |  |  |  |                                 |                   |                                                                                                                                                                                                                                                                           | <p>Risk &lt;4%:<br/>0.78 (0.66 to 0.91)</p> <p>Risk 4-5.4%: 0.86 (0.76 to 0.97)</p> <p>Risk 5.4-7.2%: 0.87 (0.78 to 0.97)</p> <p>Risk &gt;7.2%: 0.87 (0.76 to 0.98)</p> |  |  |
|  |  |  |  |  |  |  | 5-year risk of CHD <sup>9</sup> | 52035   NA   1659 | <p>For a 5mmHg greater reduction in systolic blood pressure between treatment and control, stratified by baseline risk group, the risk ratio of 5-year risk of CHD between those groups</p> <p>Risk &lt;5%: 0.84 (0.70 to 1.01)</p> <p>Risk 5-7%: 0.96 (0.83 to 1.12)</p> |                                                                                                                                                                         |  |  |



|  |  |  |  |  |  |  |                                    |  |                   |                                                                                                                                                                                                                                                                                                                                                                                    |  |  |
|--|--|--|--|--|--|--|------------------------------------|--|-------------------|------------------------------------------------------------------------------------------------------------------------------------------------------------------------------------------------------------------------------------------------------------------------------------------------------------------------------------------------------------------------------------|--|--|
|  |  |  |  |  |  |  | 5-year risk of CV mortality        |  | 52035   NA   1855 | <p>For a 5mmHg greater reduction in systolic blood pressure between treatment and control, stratified by baseline risk group, the risk ratio of 5-year risk of CV mortality between those groups</p> <p>Risk &lt;5%:<br/>0.85 (0.71 to 1.01)</p> <p>Risk 5-8%:<br/>0.85 (0.73 to 0.98)</p> <p>Risk 8-13%:<br/>0.94 (0.84 to 1.05)</p> <p>Risk &gt;13%:<br/>0.93 (0.84 to 1.03)</p> |  |  |
|  |  |  |  |  |  |  | 5-year risk of all-cause mortality |  | 48198   NA   3055 | <p>For a 5mmHg greater reduction in systolic blood pressure between treatment and control,</p>                                                                                                                                                                                                                                                                                     |  |  |

|                               |        |                              |                                                                                                                 |      |     |                         |                                       |    |                     |                                                                                                                                                                                                                                                                                     |                                                                                                                                                                                                                                       |                                                                                                                                                                               |
|-------------------------------|--------|------------------------------|-----------------------------------------------------------------------------------------------------------------|------|-----|-------------------------|---------------------------------------|----|---------------------|-------------------------------------------------------------------------------------------------------------------------------------------------------------------------------------------------------------------------------------------------------------------------------------|---------------------------------------------------------------------------------------------------------------------------------------------------------------------------------------------------------------------------------------|-------------------------------------------------------------------------------------------------------------------------------------------------------------------------------|
|                               |        |                              |                                                                                                                 |      |     |                         |                                       |    |                     | <p>stratified by baseline risk group, the risk ratio of 5-year risk of all-cause mortality between those groups</p> <p>Risk &lt;6%: 0.88 (0.78 to 0.99)</p> <p>Risk 6-10%: 0.91 (0.82 to 1.01)</p> <p>Risk 10-16%: 0.95 (0.86 to 1.05)</p> <p>Risk &gt;16%: 0.99 (0.91 to 1.08)</p> |                                                                                                                                                                                                                                       |                                                                                                                                                                               |
| Nazarzadeh 2022 <sup>43</sup> | IPD MA | People with and without T2DM | <p>ACE inhibitors</p> <p>ARBs</p> <p>Beta Blockers</p> <p>CCBs</p> <p>diuretics</p> <p>various combinations</p> | None | RCT | Systolic blood pressure | MACE <sup>11</sup> in people with T2D | 48 | 101132   NA   16776 | <p>For a 5mmHg larger decrease in systolic blood pressure between treatment arms, hazard ratio of MACE in people with T2DM 0.94 (0.91 to 0.98)</p> <p>Regression coefficient for change</p>                                                                                         | <p>“In this individual participant-level data meta-analysis of major pharmacological blood pressure-lowering trials...blood pressure-lowering treatment reduced the risk of major cardiovascular events in those with and without</p> | <p>Across RCTs using individual patient data, greater reductions in systolic blood pressure was associated with decreased rates of MACEs, both in people with and without</p> |

|  |  |  |  |  |  |  |                                          |    |                     |                                                                                                                                                                                                                                                                                            |                   |                  |
|--|--|--|--|--|--|--|------------------------------------------|----|---------------------|--------------------------------------------------------------------------------------------------------------------------------------------------------------------------------------------------------------------------------------------------------------------------------------------|-------------------|------------------|
|  |  |  |  |  |  |  |                                          |    |                     | in systolic blood pressure between treatment arms and hazard ratio of MACE in people with T2DM - 0.007 (-0.036 to 0.0205)                                                                                                                                                                  | type 2 diabetes.” | type 2 diabetes. |
|  |  |  |  |  |  |  | MACE <sup>11</sup> in people without T2D | 44 | 254146   NA   26155 | For a 5mmHg larger decrease in systolic blood pressure between treatment arms, HR of MACE in people without T2DM 0.89 (0.87 to 0.92)<br><br>Regression coefficient for change in systolic blood pressure between treatment arms and hazard ratio of MACE in people without T2DM - 0.014 (- |                   |                  |

|  |  |  |  |  |  |  |  |  |  |                 |                              |    |                    |                                                                                                                                                  |
|--|--|--|--|--|--|--|--|--|--|-----------------|------------------------------|----|--------------------|--------------------------------------------------------------------------------------------------------------------------------------------------|
|  |  |  |  |  |  |  |  |  |  | 0.035 to 0.006) |                              |    |                    |                                                                                                                                                  |
|  |  |  |  |  |  |  |  |  |  |                 | Stroke in people with T2D    | 48 | 101212   NR   5110 | For a 5mmHg larger decrease in systolic blood pressure between treatment arms, hazard ratio of stroke in people without T2DM 0.86 (0.81 to 0.91) |
|  |  |  |  |  |  |  |  |  |  |                 | Stroke in people without T2D | 44 | 254420   NR   9658 | For a 5mmHg larger decrease in systolic blood pressure between treatment arms, hazard ratio of stroke in people without T2DM 0.87 (0.84 to 0.91) |
|  |  |  |  |  |  |  |  |  |  |                 | CHD in people with T2D       | 48 | 101156   NR   8147 | For a 5mmHg larger decrease in systolic blood pressure                                                                                           |



|  |  |  |  |  |  |  |                           |    |                     |                                                                                                                                                               |  |  |
|--|--|--|--|--|--|--|---------------------------|----|---------------------|---------------------------------------------------------------------------------------------------------------------------------------------------------------|--|--|
|  |  |  |  |  |  |  |                           |    |                     | between treatment arms, hazard ratio of ischemic heart disease in people with T2DM 0.98 (0.94 to 1.03)                                                        |  |  |
|  |  |  |  |  |  |  | CHD in people without T2D | 44 | 254284   NR   12946 | For a 5mmHg larger decrease in systolic blood pressure between treatment arms, hazard ratio of ischemic heart disease in people with T2DM 0.90 (0.87 to 0.94) |  |  |
|  |  |  |  |  |  |  | HF in people with T2D     | 48 | 94571   NR   3980   | For a 5mmHg larger decrease in systolic blood pressure between treatment arms, hazard ratio of HF in people without T2DM 0.92                                 |  |  |





|                            |       |      |                                                              |            |            |                          |        |    |                 |                                                                                                                                         |                                                                                                                                                                                                                                                                                                                                                                                                                                                 |                                                                                                                                                             |
|----------------------------|-------|------|--------------------------------------------------------------|------------|------------|--------------------------|--------|----|-----------------|-----------------------------------------------------------------------------------------------------------------------------------------|-------------------------------------------------------------------------------------------------------------------------------------------------------------------------------------------------------------------------------------------------------------------------------------------------------------------------------------------------------------------------------------------------------------------------------------------------|-------------------------------------------------------------------------------------------------------------------------------------------------------------|
|                            |       |      |                                                              |            |            |                          |        |    |                 | (0.93 to 0.98)                                                                                                                          |                                                                                                                                                                                                                                                                                                                                                                                                                                                 |                                                                                                                                                             |
| Reboldi 2011 <sup>44</sup> | SRM A | T2DM | ACE inhibitors<br>ARBs<br>CCBs<br>diuretics<br>beta blockers | Non-profit | RCT, PROBE | Systolic blood pressure  | Stroke | 29 | 73913   NA   NR | For a 5mmHg larger decrease in systolic blood pressure between treatment arms, relative risk of stroke 0.870 (0.797 to 0.950), p=0.002  | “One, we found a consistent relationship between BP reduction and prevention of stroke. Two, our analyses did not disclose a significant association between the magnitude of BP reduction and prevention of MI. Three, the relationship between the degree of BP reduction and the risk of MI was not J-shaped, suggesting that a more intensive reduction of BP, whereas not providing additional benefit, does not increase the risk of MI.” | Across RCTs and PROBE studies, greater decreases in systolic and diastolic blood pressures were associated with lower relative risks of stroke, but not MI. |
|                            |       |      |                                                              |            |            | Diastolic blood pressure |        |    |                 | For a 2mmHg larger decrease in diastolic blood pressure between treatment arms, relative risk of stroke 0.885 (0.828 to 0.946), p<0.001 |                                                                                                                                                                                                                                                                                                                                                                                                                                                 |                                                                                                                                                             |
|                            |       |      |                                                              |            |            | Systolic blood pressure  | MI     | 24 |                 | For a 5mmHg larger decrease in systolic blood pressure between treatment arms,                                                          |                                                                                                                                                                                                                                                                                                                                                                                                                                                 |                                                                                                                                                             |

|                          |       |                                             |                                                                                                                                                                                                                                                                                                                                 |    |     |                                       |        |    |                     |                                                                                                                                                          |                                                                                                                                                                                                                                                             |                                                                                                                                                                                                            |
|--------------------------|-------|---------------------------------------------|---------------------------------------------------------------------------------------------------------------------------------------------------------------------------------------------------------------------------------------------------------------------------------------------------------------------------------|----|-----|---------------------------------------|--------|----|---------------------|----------------------------------------------------------------------------------------------------------------------------------------------------------|-------------------------------------------------------------------------------------------------------------------------------------------------------------------------------------------------------------------------------------------------------------|------------------------------------------------------------------------------------------------------------------------------------------------------------------------------------------------------------|
|                          |       |                                             |                                                                                                                                                                                                                                                                                                                                 |    |     |                                       |        |    |                     | relative risk of MI 0.982 (0.855 to 1.128), p=0.793                                                                                                      |                                                                                                                                                                                                                                                             |                                                                                                                                                                                                            |
|                          |       |                                             |                                                                                                                                                                                                                                                                                                                                 |    |     | Diastolic blood pressure              |        |    |                     | For a 2mmHg larger decrease in diastolic blood pressure between treatment arms, relative risk of MI 0.990 (0.898 to 1.090), p=0.832                      |                                                                                                                                                                                                                                                             |                                                                                                                                                                                                            |
| Salam 2019 <sup>45</sup> | SRM A | Patients in blood pressure reduction trials | <ul style="list-style-type: none"> <li>α-Methyldopa</li> <li>captopril</li> <li>enalapril</li> <li>fosinopril</li> <li>perindopril</li> <li>quinapril</li> <li>ramipril</li> <li>trandolapril</li> <li>candesartan</li> <li>irbesartan</li> <li>losartan</li> <li>olmesartan</li> <li>telmisartan</li> <li>valsartan</li> </ul> | NR | RCT | Systolic and diastolic blood pressure | CHD    | 86 | 349488   NR   22254 | For a 6 mmHg SBP and 3 mmHg DBP greater difference between treatment and control across all baseline BP strata, relative risk of CHD 0.86 (0.83 to 0.89) | “Overall, a 6mm Hg reduction in SBP reduced CHD by 14% and stroke by 18%...Benefits were apparent in numerous high-risk patient groups with baseline SBP less than 140mmHg, with more evidence of benefit in the SBP 130–139mmHg group than for any other.” | Across 86 RCTs, treatment was associated with either greater reductions in SBP and DBP and lower increases in SBP (at lower baseline BP strata) and lower rates of CHD, stroke, or the composite endpoint. |
|                          |       |                                             |                                                                                                                                                                                                                                                                                                                                 |    |     |                                       | Stroke |    |                     | For a 6 mmHg SBP and 3 mmHg DBP greater difference between treatment                                                                                     |                                                                                                                                                                                                                                                             |                                                                                                                                                                                                            |

|  |  |  |                                                                                                                                                                                                                                                                                                                                                                                                         |  |                         |                |    |                   |  |                                                                                                                                                                                                                                              |  |
|--|--|--|---------------------------------------------------------------------------------------------------------------------------------------------------------------------------------------------------------------------------------------------------------------------------------------------------------------------------------------------------------------------------------------------------------|--|-------------------------|----------------|----|-------------------|--|----------------------------------------------------------------------------------------------------------------------------------------------------------------------------------------------------------------------------------------------|--|
|  |  |  | atenolol<br>bisoprolol<br>bucindolol<br>carvedilol<br>metoprolol<br>nebivolol<br>oxprenolol<br>practolol<br>propranolol<br>timolol<br>amlodipine<br>diltiazem<br>felodipine<br>mibefradil<br>nifedipine<br>nisoldipine<br>nitrendipine<br>verapamil<br>bendrofluazide<br>chlorothiazide<br>chlorthalidone<br>hydrochlorothiazide<br>indapamide<br>triamterene;<br>ramipril + HCTZ<br>candesartan + HCTZ |  |                         |                |    |                   |  | and control across all baseline BP strata, relative risk of stroke 0.82 (0.79-0.86)                                                                                                                                                          |  |
|  |  |  |                                                                                                                                                                                                                                                                                                                                                                                                         |  | Systolic blood pressure | CHD and stroke | 17 | 18022   NR   1013 |  | For patients with baseline SBPs <120 mmHg, when compared to the control group treatment was associated with a 4.6 mmHg lower increase in SBP at follow-up and a relative risk of the combined CHD and stroke endpoint of 0.81 (0.72 to 0.91) |  |
|  |  |  |                                                                                                                                                                                                                                                                                                                                                                                                         |  |                         |                | 28 | 41358   NR   1859 |  | For patients with baseline SBPs between 120-129 mmHg, when compared to                                                                                                                                                                       |  |

|  |  |  |                                                                               |  |  |  |  |    |                    |                                                                                                                                                                                                                           |  |  |
|--|--|--|-------------------------------------------------------------------------------|--|--|--|--|----|--------------------|---------------------------------------------------------------------------------------------------------------------------------------------------------------------------------------------------------------------------|--|--|
|  |  |  | <p>nitrendipine ± captopril ± HCTZ</p> <p>nitrendipine ± enalapril ± HCTZ</p> |  |  |  |  |    |                    | <p>the control group treatment was associated with a 3.7 mmHg lower increase in SBP at follow-up and a relative risk of the combined CHD and stroke endpoint of 0.83 (0.76 to 0.90)</p>                                   |  |  |
|  |  |  |                                                                               |  |  |  |  | 33 | 112879   NR   6082 | <p>For patients with baseline SBPs between 130-139 mmHg, when compared to the control group treatment was associated with a 5.3 mmHg greater decrease in SBP at follow-up and a relative risk of the combined CHD and</p> |  |  |

|                                |       |                                             |                          |            |                             |                                       |                                         |    |                    |                                                                                                                              |                                                                                                                                                                                                                                                                                                                                                                                                                                                                        |                                                                                                                                                                                                                                                                              |
|--------------------------------|-------|---------------------------------------------|--------------------------|------------|-----------------------------|---------------------------------------|-----------------------------------------|----|--------------------|------------------------------------------------------------------------------------------------------------------------------|------------------------------------------------------------------------------------------------------------------------------------------------------------------------------------------------------------------------------------------------------------------------------------------------------------------------------------------------------------------------------------------------------------------------------------------------------------------------|------------------------------------------------------------------------------------------------------------------------------------------------------------------------------------------------------------------------------------------------------------------------------|
|                                |       |                                             |                          |            |                             |                                       |                                         |    |                    | stroke endpoint of 0.85 (0.81 to 0.89)                                                                                       |                                                                                                                                                                                                                                                                                                                                                                                                                                                                        |                                                                                                                                                                                                                                                                              |
| Thomopoulos 2014 <sup>46</sup> | SRM A | Patients in blood pressure reduction trials | Anti-hypertensive agents | Government | RCT, 1 alternate assignment | Systolic and diastolic blood pressure | Fatal and non-fatal stroke <sup>2</sup> | 54 | 235385   NA   9513 | For a 10 mmHg reduction in SBP and 5 mmHg reduction in DBP, risk reduction of fatal and non-fatal stroke 0.64 (0.57 to 0.71) | “Our primary meta-analysis...confirms that stroke and heart failure were the events most effectively prevented by BP lowering (heart failure to an even larger extent than stroke), but also CHD and cardiovascular and all-cause deaths were significantly prevented though to a smaller extent. Our secondary meta-analysis, comprehensive of intentional and nonintentional BP-lowering RCTs...is entirely consistent with the conclusion of the primary analysis.” | Across many RCTs involving both intentional and non-intentional blood pressure lowering trials, reductions in systolic and diastolic blood pressures were associated with lower risks of several clinical outcomes, including stroke, CHD, HF, and CV & all-cause mortality. |
|                                |       |                                             |                          |            |                             |                                       | CHD <sup>7</sup>                        | 58 | 236064   NA   8512 | For a 10 mmHg reduction in SBP and 5 mmHg reduction in DBP, risk reduction of CHD 0.82 (0.57 to 0.71)                        |                                                                                                                                                                                                                                                                                                                                                                                                                                                                        |                                                                                                                                                                                                                                                                              |
|                                |       |                                             |                          |            |                             |                                       | HF hospitalization <sup>2</sup>         | 36 | 147921   NA   5787 | For a 10 mmHg reduction in SBP and 5 mmHg reduction in DBP, risk reduction of hospitalization for HF 0.62 (0.51 to 0.75)     |                                                                                                                                                                                                                                                                                                                                                                                                                                                                        |                                                                                                                                                                                                                                                                              |



|  |  |  |  |  |  |  |                                                             |    |                     |                                                                                                                                            |
|--|--|--|--|--|--|--|-------------------------------------------------------------|----|---------------------|--------------------------------------------------------------------------------------------------------------------------------------------|
|  |  |  |  |  |  |  | Fatal and non-fatal stroke <sup>2</sup> + CHD <sup>7</sup>  | 56 | 234575   NA   17861 | For a 10 mmHg reduction in SBP and 5 mmHg reduction in DBP, risk reduction of fatal and non-fatal stroke and CHD 0.74 (0.70 to 0.80)       |
|  |  |  |  |  |  |  | Stroke <sup>2</sup> + CHD <sup>7</sup> + HF hospitalization | 38 | 168680   NA   19461 | For a 10 mmHg reduction in SBP and 5 mmHg reduction in DBP, risk reduction of stroke, CHD, and hospitalization for HF: 0.73 (0.68 to 0.79) |
|  |  |  |  |  |  |  | CV mortality                                                | 58 | 236022   NA   9543  | For a 10 mmHg reduction in SBP and 5 mmHg reduction in DBP, risk reduction of CV mortality: 0.84 (0.77 to 0.92)                            |
|  |  |  |  |  |  |  | All-cause mortality                                         | 66 | 243764   NA   18031 | For a 10 mmHg reduction in                                                                                                                 |



**eTable 11. Hypertriglyceridemia**

| Author, Year               | Study design | Indication           | Interventions                                                               | Funding source                     | Design of included studies | Surrogate marker    | Clinical outcome                   | No. studies | Sample size   number of outcomes | Evidence                                                                                                                                                                                           | Author's conclusion                                                                                                                                                                                                       | Plaint ext Summary                                                                                                                                                                         |
|----------------------------|--------------|----------------------|-----------------------------------------------------------------------------|------------------------------------|----------------------------|---------------------|------------------------------------|-------------|----------------------------------|----------------------------------------------------------------------------------------------------------------------------------------------------------------------------------------------------|---------------------------------------------------------------------------------------------------------------------------------------------------------------------------------------------------------------------------|--------------------------------------------------------------------------------------------------------------------------------------------------------------------------------------------|
| Marston 2019 <sup>33</sup> | SRMA         | Hypertriglyceridemia | unspecified fibrates<br>niacin<br>omega-3 fatty acid<br>unspecified statins | None; industry competing interests | RCT, open-label            | Serum triglycerides | Major vascular events <sup>2</sup> | 44          | 374358   NR   46180              | For a 1 mmol/L reduction in triglycerides, relative risk for major vascular events 0.84, (0.75 to 0.94), p=0.0026<br><br>With the REDUCE-IT trial removed: For a 1 mmol/L reduction in triglycerid | "In randomized controlled trials, triglyceride lowering is associated with a lower risk of major vascular events, even after adjusting for LDL-C lowering, although the effect is attenuated when REDUCE-IT is excluded." | In 44 RCTs, reductions in triglycerides were independently associated with decreased risk of major vascular events, though this was heavily influenced by the presence of one large trial. |

|                                |          |                          |                                                                                                                                                                                                                                                                                            |          |     |                            |                                              |    |                           |                                                                                                                                                                                                                                                                                                             |                                                                                                                                                                                                                                                             |                                                                                                                                                                                                                                                                                                                                                                                                                                                                              |
|--------------------------------|----------|--------------------------|--------------------------------------------------------------------------------------------------------------------------------------------------------------------------------------------------------------------------------------------------------------------------------------------|----------|-----|----------------------------|----------------------------------------------|----|---------------------------|-------------------------------------------------------------------------------------------------------------------------------------------------------------------------------------------------------------------------------------------------------------------------------------------------------------|-------------------------------------------------------------------------------------------------------------------------------------------------------------------------------------------------------------------------------------------------------------|------------------------------------------------------------------------------------------------------------------------------------------------------------------------------------------------------------------------------------------------------------------------------------------------------------------------------------------------------------------------------------------------------------------------------------------------------------------------------|
|                                |          |                          |                                                                                                                                                                                                                                                                                            |          |     |                            |                                              |    |                           | es,<br>relative<br>risk for<br>major<br>vascular<br>events<br>0.91, (0.81<br>to 1.006),<br>p=0.06                                                                                                                                                                                                           |                                                                                                                                                                                                                                                             |                                                                                                                                                                                                                                                                                                                                                                                                                                                                              |
| Stauffer<br>2013 <sup>35</sup> | SRM<br>A | Hypertriglyceride<br>mia | atorvastatin<br>lovastatin<br>pravastatin<br>simvastatin<br>simvastatin/ezetimibe<br>rosuvastatin<br>bezafibrate<br>fenofibrate<br>gemfibrozil<br>niacin<br>niacin/gemfibrozil/cholestyramine<br>simvastatin/niacin<br>estrogen-progestin<br>omega-3 fatty acids<br>cholestyramine<br>diet | Industry | RCT | Serum<br>triglycerid<br>es | Major<br>vascula<br>r<br>events <sup>3</sup> | 40 | 200593  <br>NR  <br>16843 | The<br>proportion<br>al change<br>of<br>triglycerid<br>es<br>between<br>treatment<br>in control<br>arms and<br>the log<br>ratio of<br>event<br>rates<br>between<br>treatment<br>and<br>control<br>arms of<br>major<br>vascular<br>events<br>across all<br>studies<br>has a<br>slope of<br>0.488,<br>p=0.005 | “Changes in<br>triglyceride<br>levels were<br>predictive of<br>cardiovascu<br>lar events in<br>RCTs.<br><br>This<br>relationship<br>was<br>significant in<br>primary<br>prevention<br>populations<br>but not in<br>secondary<br>prevention<br>populations.” | Across 40 RCTs,<br>reductions in<br>triglycerides were<br>associated with<br>decreased risk of<br>major vascular<br>events, which in this<br>meta-analysis were<br>mostly<br>cardiovascular, even<br>when taking into<br>account lipoprotein<br>levels known to be<br>involved with<br>atherosclerosis. The<br>triglyceride-vascular<br>event relationship<br>was statistically<br>significant in primary<br>prevention studies,<br>but not secondary<br>prevention studies. |
|                                |          |                          |                                                                                                                                                                                                                                                                                            |          |     |                            |                                              | 11 | NR   NR<br>  NR           | The<br>proportion<br>al change<br>of<br>triglycerid<br>es<br>between<br>treatment                                                                                                                                                                                                                           |                                                                                                                                                                                                                                                             |                                                                                                                                                                                                                                                                                                                                                                                                                                                                              |

|  |  |  |  |  |  |  |  |    |                 |                                                                                                                                                                                                 |  |  |
|--|--|--|--|--|--|--|--|----|-----------------|-------------------------------------------------------------------------------------------------------------------------------------------------------------------------------------------------|--|--|
|  |  |  |  |  |  |  |  |    |                 | in control arms and the log ratio of event rates between treatment and control arms of major vascular events in primary prevention studies has a slope of 1.031, $p=0.010$                      |  |  |
|  |  |  |  |  |  |  |  | 25 | NR   NR<br>  NR | The proportional change of triglycerides between treatment in control arms and the log ratio of event rates between treatment and control arms of major vascular events in secondary prevention |  |  |

|                               |       |                      |                                                                                                                                                                                                                                                                                                                                                                                                                    |            |     |                     |        |    |                                   |                                                                                                                                                                                                   |                                                                                                                                                                                                            |                                                                                                                                                                                                                                                                                                         |
|-------------------------------|-------|----------------------|--------------------------------------------------------------------------------------------------------------------------------------------------------------------------------------------------------------------------------------------------------------------------------------------------------------------------------------------------------------------------------------------------------------------|------------|-----|---------------------|--------|----|-----------------------------------|---------------------------------------------------------------------------------------------------------------------------------------------------------------------------------------------------|------------------------------------------------------------------------------------------------------------------------------------------------------------------------------------------------------------|---------------------------------------------------------------------------------------------------------------------------------------------------------------------------------------------------------------------------------------------------------------------------------------------------------|
|                               |       |                      |                                                                                                                                                                                                                                                                                                                                                                                                                    |            |     |                     |        |    |                                   | studies has a slope of 0.373, p=0.114                                                                                                                                                             |                                                                                                                                                                                                            |                                                                                                                                                                                                                                                                                                         |
| Labreuc he 2010 <sup>32</sup> | SRM A | Hypertriglyceridemia | atorvastatin<br>cerivastatin<br>fluvastatin<br>lovastatin<br>pravastatin<br>simvastatin<br>bezafibrate<br>clofibrate<br>fenofibrate<br>gemfibrozil<br>niacin<br>pioglitazone<br>rosiglitazone<br>troglitazone<br>metformin<br>glimepiride<br>glyburide<br>clofibrate + niacin<br>colestipol + niacin<br>gemfibrozil + niacin + cholestyramine<br>simvastatin + ezetimibe<br>statin + ezetimibe + fibrate or niacin | Non-profit | RCT | Serum triglycerides | Stroke | 64 | 165,792   NR   >5929 <sup>1</sup> | For a 10 mg/dL greater decrease in absolute triglyceride between active and control groups and adjusted for baseline triglyceride levels, log relative risk of stroke: 0.4, (-3.8 to 4.8), p=0.84 | "Despite the analysis of lipid-modifying randomized trials including >190,000 patients, the present meta-regression analysis failed to detect a positive impact of triglyceride reduction on stroke risk." | Despite evidence of association of baseline triglyceride levels with stroke in the analysis of 64 RCTs, there was no evidence of association between greater decreases in triglyceride levels between treatment and control arms, when adjusted for baseline values, and decreased incidence of stroke. |

|  |  |  |                 |  |  |  |  |  |  |  |  |  |
|--|--|--|-----------------|--|--|--|--|--|--|--|--|--|
|  |  |  | statin + niacin |  |  |  |  |  |  |  |  |  |
|--|--|--|-----------------|--|--|--|--|--|--|--|--|--|

1: Data not reported in 12 studies

2: Defined by each study, but often including stroke, coronary heart disease-related death, myocardial infarction, coronary revascularization; sometimes as all-cause mortality, any acute coronary syndrome

3: Defined by each study, but most often coronary heart disease-related death, myocardial infarction; sometimes as coronary revascularization, stroke, angina, or acute coronary syndrome

| eTable 12. Osteoporosis  |              |              |                                                                                                                                                                                                                                           |                |                            |                      |                                    |             |                                                                      |                                                                                                                                                                                                                            |                                                                                                                                                                                                                                                                                       |                                                                                                                                                                                                                                                                                                                                                                               |
|--------------------------|--------------|--------------|-------------------------------------------------------------------------------------------------------------------------------------------------------------------------------------------------------------------------------------------|----------------|----------------------------|----------------------|------------------------------------|-------------|----------------------------------------------------------------------|----------------------------------------------------------------------------------------------------------------------------------------------------------------------------------------------------------------------------|---------------------------------------------------------------------------------------------------------------------------------------------------------------------------------------------------------------------------------------------------------------------------------------|-------------------------------------------------------------------------------------------------------------------------------------------------------------------------------------------------------------------------------------------------------------------------------------------------------------------------------------------------------------------------------|
| Author, Year             | Study design | Indication   | Interventions                                                                                                                                                                                                                             | Funding source | Design of included studies | Surrogate marker     | Clinical outcome                   | No. studies | Overall sample size   No. surrogate measures   No. clinical outcomes | Evidence                                                                                                                                                                                                                   | Author's conclusion                                                                                                                                                                                                                                                                   | Plaintext Summary                                                                                                                                                                                                                                                                                                                                                             |
| Black 2020 <sup>48</sup> | IPD MA       | Osteoporosis | alendronate<br>arzoxifene<br>bazedoxifene<br>denosumab<br>equine estrogen<br>equine estrogen + medroxyprogesterone<br>ibandronate<br>lasofoxifene<br>odanacatib<br>PTH(1-34)<br>PRH(1-84)<br>raloxifene<br>risedronate<br>zoledronic acid | Government     | RCT                        | Hip BMD <sup>3</sup> | Vertebral fractures <sup>1,2</sup> | 14          | 53410   NR   4402                                                    | Odds ratio of vertebral fracture risk reduction between treatment and placebo arms versus difference in mean percentage change in hip BMD between those arms after 24 months: R <sup>2</sup> 0.73 (0.41 to 0.83), p<0.0001 | "...we found strong and significant associations between treatment induced changes in BMD and reductions in vertebral, hip, and non-vertebral fractures. These results confirm that larger net increases in BMD with treatment are associated with larger fracture risk reductions. " | Across placebo controlled trials, differences in bone mineral density between treatment arms and placebo controls were significantly and consistently associated with decreased odds of fracture (for vertebral fracture) and increased time to fracture from trial initiation. These associations were directional and scalable, and changes in bone mineral density explain |
|                          |              |              |                                                                                                                                                                                                                                           |                |                            |                      | Hip fractures                      | 15          | 61415   NR   841                                                     | Hazard ratio of time to first hip fracture between treatment and placebo arms                                                                                                                                              |                                                                                                                                                                                                                                                                                       |                                                                                                                                                                                                                                                                                                                                                                               |



|  |  |  |  |  |  |                         |                     |                   |                                                                                                                                                                                                                                 |  |                                                                                                                                                                                                                                                                                                                                                                                                          |
|--|--|--|--|--|--|-------------------------|---------------------|-------------------|---------------------------------------------------------------------------------------------------------------------------------------------------------------------------------------------------------------------------------|--|----------------------------------------------------------------------------------------------------------------------------------------------------------------------------------------------------------------------------------------------------------------------------------------------------------------------------------------------------------------------------------------------------------|
|  |  |  |  |  |  |                         |                     |                   | versus difference in mean percentage change in hip BMD between those arms after 24 months: R <sup>2</sup> 0.41 (0.06 to 0.62), p=0.014                                                                                          |  | <p>statistically significant proportions of the treatment effects.</p> <p>However, it is worth noting that definitions of vertebral fracture varied across the component studies. Some of the studies used quantitative morphometry. According to FDA's surrogate endpoint table, new morphometric vertebral fractures are considered a surrogate marker for postmenopausal women with osteoporosis.</p> |
|  |  |  |  |  |  | Non-vertebral fractures | 15                  | 66703   NR   6440 | Hazard ratio of time to first non-vertebral fracture between treatment and placebo arms versus difference in mean percentage change in hip BMD between those arms after 24 months: R <sup>2</sup> 0.53 (0.16 to 0.69), p=0.0021 |  |                                                                                                                                                                                                                                                                                                                                                                                                          |
|  |  |  |  |  |  | Femoral neck BMD        | Vertebral fractures | 16                | 53410   NR   5065                                                                                                                                                                                                               |  |                                                                                                                                                                                                                                                                                                                                                                                                          |

|  |  |  |  |  |  |  |  |  |  |                                                                                                                                                       |    |                   |                                                                                                                                                                                                                                |
|--|--|--|--|--|--|--|--|--|--|-------------------------------------------------------------------------------------------------------------------------------------------------------|----|-------------------|--------------------------------------------------------------------------------------------------------------------------------------------------------------------------------------------------------------------------------|
|  |  |  |  |  |  |  |  |  |  | arms versus difference in mean percentage change in femoral neck BMD between those arms after 24 months: R <sup>2</sup> 0.59 (0.25 to 0.73), p=0.0005 |    |                   |                                                                                                                                                                                                                                |
|  |  |  |  |  |  |  |  |  |  | Hip fractures                                                                                                                                         | 17 | 61415   NR   1063 | Hazard ratio of time to first hip fracture between treatment and placebo arms versus difference in mean percentage change in femoral neck BMD between those arms after 24 months: R <sup>2</sup> 0.41 (0.08 to 0.61), p=0.0074 |
|  |  |  |  |  |  |  |  |  |  | Non-vertebral fractures                                                                                                                               | 17 | 66703   NR   7453 | Hazard ratio of time to first non-vertebral fracture between                                                                                                                                                                   |

|  |  |  |  |  |  |           |                      |    |                   |                                                                                                                                                                                                                              |  |  |
|--|--|--|--|--|--|-----------|----------------------|----|-------------------|------------------------------------------------------------------------------------------------------------------------------------------------------------------------------------------------------------------------------|--|--|
|  |  |  |  |  |  |           |                      |    |                   | treatment and placebo arms versus difference in mean percentage change in femoral neck BMD between those arms after 24 months: R <sup>2</sup> 0.65 (0.33 to 0.77), p<0.0001                                                  |  |  |
|  |  |  |  |  |  | Spine BMD | Vertebra   fractures | 16 | 53410   NR   5065 | Odds ratio of vertebral fracture risk reduction between treatment and placebo arms versus difference in mean percentage change in spine BMD between those arms after 24 months: R <sup>2</sup> 0.61 (0.27 to 0.74), p=0.0003 |  |  |
|  |  |  |  |  |  |           | Hip fractures        | 16 | 61415   NR   1007 | Hazard ratio of time to first hip fracture                                                                                                                                                                                   |  |  |

|                             |      |              |               |                      |     |         |                         |    |                   |                                                                                                                                                                                                                                   |                                         |                           |
|-----------------------------|------|--------------|---------------|----------------------|-----|---------|-------------------------|----|-------------------|-----------------------------------------------------------------------------------------------------------------------------------------------------------------------------------------------------------------------------------|-----------------------------------------|---------------------------|
|                             |      |              |               |                      |     |         |                         |    |                   | between treatment and placebo arms versus difference in mean percentage change in spine BMD between those arms after 24 months: R <sup>2</sup> 0.34 (0.03 to 0.56), p=0.023                                                       |                                         |                           |
|                             |      |              |               |                      |     |         | Non-vertebral fractures | 16 | 66703   NR   7267 | Hazard ratio of time to first non-vertebral fracture between treatment and placebo arms versus difference in mean percentage change in spine BMD between those arms after 24 months: R <sup>2</sup> 0.51 (0.16 to 0.68), p=0.0019 |                                         |                           |
| Bouxsein 2019 <sup>49</sup> | SRMA | Osteoporosis | abaloparatide | Government; industry | RCT | Hip BMD | Vertebral               | 20 | 91340   NR   3174 | Relative risk of vertebral                                                                                                                                                                                                        | "We found that change in BMD across all | Across placebo-controlled |

|  |  |  |                                                                                                                                                                                                                                                                                           |  |  |  |                         |    |                   |                                                                                                                                                                                                  |                                                                                                                                                                                                                                                                                                                                                                                                                                                                                                                                                                     |                                                                                                                                                                                                                                                                                                                                                                                                                                                                                                            |
|--|--|--|-------------------------------------------------------------------------------------------------------------------------------------------------------------------------------------------------------------------------------------------------------------------------------------------|--|--|--|-------------------------|----|-------------------|--------------------------------------------------------------------------------------------------------------------------------------------------------------------------------------------------|---------------------------------------------------------------------------------------------------------------------------------------------------------------------------------------------------------------------------------------------------------------------------------------------------------------------------------------------------------------------------------------------------------------------------------------------------------------------------------------------------------------------------------------------------------------------|------------------------------------------------------------------------------------------------------------------------------------------------------------------------------------------------------------------------------------------------------------------------------------------------------------------------------------------------------------------------------------------------------------------------------------------------------------------------------------------------------------|
|  |  |  | alendronate<br>arxoxifene<br>bazedoxifene<br>calcitonin<br>clodronate<br>denosumab<br>etidronate<br>estrogen<br>estrogen +<br>progestin<br>ibandronate<br>lasofoxifene<br>odanacatib<br>PTH(1-34)<br>PTH(1-84)<br>raloxifene<br>risedronate<br>romosozumab<br>tibolone<br>zoledronic acid |  |  |  | fractures <sup>4</sup>  |    |                   | fracture, as confirmed by radiograph, between treatment and placebo arms versus difference in mean percentage change in hip BMD between those arms: R <sup>2</sup> 0.56 (0.26 to 0.70), p=0.0002 | published randomized trials is strongly predictive of hip and vertebral fracture reduction...In contrast, lumbar spine BMD changes were predictive only of vertebral fracture risk...very weakly associated with reductions in nonvertebral fracture in these analyses...Although these results cannot be directly applied to predict the treatment benefit in an individual patient, they provide compelling evidence that improvements in BMD with osteoporosis therapies may be useful as surrogate endpoints for fracture in trials of new therapeutic agents." | trials, differences in changes in hip bone mineral density between treatment and placebo were associated with decreases in relative risk of vertebral and hip fractures, with larger improvements in BMD associated with greater reductions in hip fractures specifically. A similar association was seen between decreased relative risk of vertebral fractures with improvements in femoral neck and spine BMD. However, there was no statistical evidence of decreased risk of non-vertebral fractures. |
|  |  |  |                                                                                                                                                                                                                                                                                           |  |  |  | Hip fractures           | 12 | 85010   NR   882  | Relative risk of hip fracture between treatment and placebo arms versus difference in mean percentage change in hip BMD between those arms: R <sup>2</sup> 0.48 (0.07 to 0.67), p=0.013          |                                                                                                                                                                                                                                                                                                                                                                                                                                                                                                                                                                     |                                                                                                                                                                                                                                                                                                                                                                                                                                                                                                            |
|  |  |  |                                                                                                                                                                                                                                                                                           |  |  |  | Non-vertebral fractures | 22 | 74513   NR   4999 | Relative risk of non-vertebral                                                                                                                                                                   |                                                                                                                                                                                                                                                                                                                                                                                                                                                                                                                                                                     |                                                                                                                                                                                                                                                                                                                                                                                                                                                                                                            |

|  |  |  |  |  |  |                  |                     |    |                                                                                                                                                                   |                                                                                                                                                                                                                             |  |  |
|--|--|--|--|--|--|------------------|---------------------|----|-------------------------------------------------------------------------------------------------------------------------------------------------------------------|-----------------------------------------------------------------------------------------------------------------------------------------------------------------------------------------------------------------------------|--|--|
|  |  |  |  |  |  |                  |                     |    | fracture between treatment and placebo arms versus difference in mean percentage change in hip BMD between those arms: R <sup>2</sup> 0.12 (0.00 to 0.34), p=0.11 |                                                                                                                                                                                                                             |  |  |
|  |  |  |  |  |  | Femoral neck BMD | Vertebral fractures | 24 | 73904   NR   3630                                                                                                                                                 | Relative risk of vertebral fracture, as confirmed by radiograph, between treatment and placebo arms versus difference in mean percentage change in hip BMD between those arms: R <sup>2</sup> 0.54 (0.27 to 0.68), p<0.0001 |  |  |
|  |  |  |  |  |  |                  | Hip fractures       | 13 | 69557   NR   816                                                                                                                                                  | Relative risk of hip                                                                                                                                                                                                        |  |  |

|  |  |  |  |  |  |  |                         |    |                   |                                                                                                                                                                                                  |  |  |
|--|--|--|--|--|--|--|-------------------------|----|-------------------|--------------------------------------------------------------------------------------------------------------------------------------------------------------------------------------------------|--|--|
|  |  |  |  |  |  |  |                         |    |                   | fracture between treatment and placebo arms versus difference in mean percentage change in hip BMD between those arms: R <sup>2</sup> 0.42 (0.05 to 0.63), p=0.17                                |  |  |
|  |  |  |  |  |  |  | Non-vertebral fractures | 28 | 84981   NR   6383 | Relative risk of non-vertebral fracture between treatment and placebo arms versus difference in mean percentage change in hip BMD between those arms: R <sup>2</sup> 0.12 (0.00 to 0.31), p=0.07 |  |  |

|  |  |  |  |  |  |           |                      |    |                    |                                                                                                                                                                                                                             |  |  |
|--|--|--|--|--|--|-----------|----------------------|----|--------------------|-----------------------------------------------------------------------------------------------------------------------------------------------------------------------------------------------------------------------------|--|--|
|  |  |  |  |  |  | Spine BMD | Vertebra I fractures | 30 | 111183   NR   4557 | Relative risk of vertebral fracture, as confirmed by radiograph, between treatment and placebo arms versus difference in mean percentage change in hip BMD between those arms: R <sup>2</sup> 0.63 (0.41 to 0.73), p<0.0001 |  |  |
|  |  |  |  |  |  |           | Hip fractures        | 15 | 94469   NR   863   | Relative risk of hip fracture between treatment and placebo arms versus difference in mean percentage change in hip BMD between those arms: R <sup>2</sup> 0.22 (0.00 to 0.46), p=0.08                                      |  |  |



|                             |      |                                      |                                                                                                  |                                       |     |           |                         |    |                                      |                                                                                                                                                                                                  |                                                                                                                                                                                  |                                                                                                                                                                           |
|-----------------------------|------|--------------------------------------|--------------------------------------------------------------------------------------------------|---------------------------------------|-----|-----------|-------------------------|----|--------------------------------------|--------------------------------------------------------------------------------------------------------------------------------------------------------------------------------------------------|----------------------------------------------------------------------------------------------------------------------------------------------------------------------------------|---------------------------------------------------------------------------------------------------------------------------------------------------------------------------|
|                             |      |                                      |                                                                                                  |                                       |     |           | Non-vertebral fractures | 32 | 92556   NR   6340                    | Relative risk of non-vertebral fracture between treatment and placebo arms versus difference in mean percentage change in hip BMD between those arms: R <sup>2</sup> 0.12 (0.00 to 0.30), p=0.05 |                                                                                                                                                                                  |                                                                                                                                                                           |
| Cummings 2002 <sup>50</sup> | SRMA | Osteoporosis in postmenopausal women | alendronate<br>calcitonin<br>estradiol<br>etidronate<br>raloxifene<br>risedronate<br>tiludronate | Unclear; industry competing interests | RCT | Spine BMD | Vertebral fractures     | 12 | 17746 (according to table)   NR   NR | A 1% improvement in spine bone mineral density in the treatment over placebo arms was associated with a decrease in the relative risk of vertebral fractures of 0.03 (0.02 to 0.05), p=0.002     | "Our analyses indicate that improvement in spine bone mineral density...accounts for a part of the reduction in risk of vertebral fractures observed with antiresorptive drugs." | Across 12 RCTs using several drug classes, improvements in spine bone mineral density were associated with decreased risks of vertebral fractures in postmenopausal women |
| Hochberg 2002 <sup>51</sup> | SRMA | Osteoporosis in                      | alendronate                                                                                      | Industry                              | RCT | Spine BMD | Non-vertebral           | 17 | 26494   NR   1916                    | A 1% greater change in                                                                                                                                                                           | "..changes in BMD...appeared to explain a                                                                                                                                        | In several RCTs, improvements                                                                                                                                             |

|                          |                 |                                      |                                                                                                            |          |     |           |                                      |    |                                                                |                                                                                                                                                                             |                                                                                                                                                                                                                                                                                                                           |                                                                                                                                                              |
|--------------------------|-----------------|--------------------------------------|------------------------------------------------------------------------------------------------------------|----------|-----|-----------|--------------------------------------|----|----------------------------------------------------------------|-----------------------------------------------------------------------------------------------------------------------------------------------------------------------------|---------------------------------------------------------------------------------------------------------------------------------------------------------------------------------------------------------------------------------------------------------------------------------------------------------------------------|--------------------------------------------------------------------------------------------------------------------------------------------------------------|
|                          |                 | postmenopausal women                 | alendronate + estrogen<br>calcitonin<br>etidronate<br>estrogen<br>risedronate<br>raloxifene<br>tiludronate |          |     |           | fractures <sup>4</sup>               |    |                                                                | spine bone mineral density in the treatment arm vs placebo at 1 year was associated with an 8.2% (SE 0.0349) reduction in non-vertebral fracture risk, p=0.02               | significant part of the risk reduction and indicate that there is no significant effect of treatment on fracture risk for treatments that were not associated with increases in BMD...the antifracture efficacy of antiresorptive agents is associated with changes in BMD for both nonvertebral and vertebral fractures. | in spine and hip bone mineral density in the treatment arms over placebo were consistently associated with decreases in the risk of non-vertebral fractures. |
|                          |                 |                                      |                                                                                                            |          |     | Hip BMD   |                                      | 14 | 24477   NR   2190                                              | A 1% greater change in spine bone mineral density in the treatment arm vs placebo at 1 year was associated with a 27% (SE 0.0976) reduction in non-vertebral fracture risk. |                                                                                                                                                                                                                                                                                                                           |                                                                                                                                                              |
| Watts 2005 <sup>53</sup> | Pooled analyses | Osteoporosis in postmenopausal women | risedronate                                                                                                | Industry | RCT | Spine BMD | Non-vertebral fractures <sup>6</sup> | 3  | 3979   3290   <307<br><br>Risedronate only:<br>2087   NR   123 | Hazard ratio of non-vertebral fracture for those patients treated with risedronate with                                                                                     | "The results of this analysis of data from the risedronate clinical trial phase III fracture programs show that greater increases in BMD                                                                                                                                                                                  | In a pooled analysis of 3 RCTs with patients treated with risedronate and using individual patient data,                                                     |

|  |  |  |  |  |                  |   |                                   |                                                                                                                                                                                       |                                                                                                                                                                                                                                                                              |                                                                                                                                                                                                                                                                          |                                                                                                                                                                                                                                                                                                                                                                                                                        |
|--|--|--|--|--|------------------|---|-----------------------------------|---------------------------------------------------------------------------------------------------------------------------------------------------------------------------------------|------------------------------------------------------------------------------------------------------------------------------------------------------------------------------------------------------------------------------------------------------------------------------|--------------------------------------------------------------------------------------------------------------------------------------------------------------------------------------------------------------------------------------------------------------------------|------------------------------------------------------------------------------------------------------------------------------------------------------------------------------------------------------------------------------------------------------------------------------------------------------------------------------------------------------------------------------------------------------------------------|
|  |  |  |  |  |                  |   |                                   |                                                                                                                                                                                       | <p>increases in spinal BMD to those risedronate-treated patients with decreases in spinal BMD: 0.79 (0.50 to 1.25)</p> <p>Hazard ratio of non-vertebral fracture versus change in spinal BMD as a continuous covariate in risedronate-treated patients 1.02 (0.97, 1.06)</p> | <p>are not associated with greater decreases in nonvertebral fracture incidence...Our findings...indicate that the magnitude of change in BMD associated with antiresorptive treatment is not a valid surrogate for reduction in the risk of nonvertebral fractures.</p> | <p>there was no observable change in relative risk of non-vertebral fractures in those risedronate-treated patients who gained BMD in either the spine or femoral neck versus those risedronate-treated patients who lost BMD in those areas. Further analysis did not indicate that increases in BMD in patients given risedronate were associated with decreases in non-vertebral fracture risk in these groups.</p> |
|  |  |  |  |  | Femoral neck BMD | 3 | Risedronate only: 2504   NR   162 | <p>Hazard ratio of non-vertebral fracture for those patients treated with risedronate with increases in spinal BMD to those risedronate-treated patients with decreases in spinal</p> |                                                                                                                                                                                                                                                                              |                                                                                                                                                                                                                                                                          |                                                                                                                                                                                                                                                                                                                                                                                                                        |

|                            |    |                                      |                                                                             |    |     |                      |                                   |    |                |                                                                                                                                                                                          |                                                                                                                                                                                                                                                                                                       |                                                                                                                                                                          |
|----------------------------|----|--------------------------------------|-----------------------------------------------------------------------------|----|-----|----------------------|-----------------------------------|----|----------------|------------------------------------------------------------------------------------------------------------------------------------------------------------------------------------------|-------------------------------------------------------------------------------------------------------------------------------------------------------------------------------------------------------------------------------------------------------------------------------------------------------|--------------------------------------------------------------------------------------------------------------------------------------------------------------------------|
|                            |    |                                      |                                                                             |    |     |                      |                                   |    |                | BMD: 0.93<br>(0.68 to 1.28)<br><br>Hazard ratio of non-vertebral fracture versus change in femoral neck BMD as a continuous covariate in risedronate-treated patients: 1.01 (0.98, 1.05) |                                                                                                                                                                                                                                                                                                       |                                                                                                                                                                          |
| Wasnich 2000 <sup>52</sup> | MA | Osteoporosis in postmenopausal women | alendronate<br>calcitonin<br>etidronate<br>HRT<br>raloxifene<br>tiludronate | NR | RCT | Spine BMD            | Vertebra   fractures <sup>4</sup> | 13 | NR   NR   1577 | An 8% increase in spine BMD in the treatment arm vs placebo was associated with a relative risk of vertebral fracture of 0.59 (0.43-0.80)                                                | "Our finding that larger increases in BMD are associated with greater antifracture efficacy is concordant with our conceptual model...the results support the theory that clinically important degrees of antifracture efficacy cannot be attained without an adequate, concomitant increase in BMD." | In several placebo-controlled RCTs, increases in spine and hip BMD were associated with, and thought to be causative of, decreased relative risks of vertebral fracture. |
|                            |    |                                      |                                                                             |    |     | Hip BMD <sup>5</sup> |                                   | 9  | NR   NR   1350 | An 5% increase in hip BMD in the treatment arm vs placebo was associated with a                                                                                                          |                                                                                                                                                                                                                                                                                                       |                                                                                                                                                                          |

|  |  |  |  |  |  |  |  |  |  |  |                                                         |  |  |
|--|--|--|--|--|--|--|--|--|--|--|---------------------------------------------------------|--|--|
|  |  |  |  |  |  |  |  |  |  |  | relative risk of vertebral fracture of 0.62 (0.46-0.83) |  |  |
|--|--|--|--|--|--|--|--|--|--|--|---------------------------------------------------------|--|--|

BMD: Bone mineral density

- 1: Fracture was often defined by individual study, though attempts were made to exclude fractures from major trauma, if reported
- 2: L1-L4 preferentially, L2-L4 if not differentiated within the study
- 3: Interconverted measurements to create standardized values
- 4: Defined by each study individually
- 5: Measured either as total hip or femoral neck
- 6: Confirmed radiographically

**eTable 13. Pulmonary fibrosis**

| Author, Year | Study design | Indication | Interventions | Funding source | Design of included studies | Surrogate marker | Clinical outcome | No. studies | Overall sample size   No. surrogate measures   No. clinical outcomes | Evidence | Author's conclusion | Plaintext Summary |
|--------------|--------------|------------|---------------|----------------|----------------------------|------------------|------------------|-------------|----------------------------------------------------------------------|----------|---------------------|-------------------|
|--------------|--------------|------------|---------------|----------------|----------------------------|------------------|------------------|-------------|----------------------------------------------------------------------|----------|---------------------|-------------------|

|                         |           |                               |                                                                            |            |     |                  |                                                 |    |                 |                                                                                                                              |                                                                                                                                                                                                                                                            |                                                                                                                                                                          |
|-------------------------|-----------|-------------------------------|----------------------------------------------------------------------------|------------|-----|------------------|-------------------------------------------------|----|-----------------|------------------------------------------------------------------------------------------------------------------------------|------------------------------------------------------------------------------------------------------------------------------------------------------------------------------------------------------------------------------------------------------------|--------------------------------------------------------------------------------------------------------------------------------------------------------------------------|
| Khan 2022 <sup>54</sup> | IPD<br>MA | Idiopathic pulmonary fibrosis | azathioprine<br>mycophenolate<br>nintedanib<br>pirfenidone<br>prednisolone | Government | RCT | Δ 3-month<br>FVC | Mortality (placebo arms)                        | 12 | 1729   NR   159 | Per 2.5% relative decline in FVC over 3 months, hazard ratio for mortality in the placebo arms 1.15 (1.06 to 1.24)           | "IPD meta-analysis demonstrated that 3-month changes in physiological variables, particularly FVC, were associated with mortality among individuals with IPF. FVC change over 3 months may hold potential as a surrogate endpoint in IPF adaptive trials." | Across the placebo arms of 12 RCTs and treatment arms of 2 medications, changes in FVC at 3 months was associated with differences in mortality and disease progression. |
|                         |           |                               |                                                                            |            |     |                  | Mortality (treatment arms)                      | 6  | 1602   NR   135 | Per 2.5% relative decline in FVC over 3 months, hazard ratio for mortality in the treatment arms 1.20 (1.12 to 1.28)         |                                                                                                                                                                                                                                                            |                                                                                                                                                                          |
|                         |           |                               |                                                                            |            |     |                  | Disease progression <sup>1</sup> (placebo arms) | 12 | 1551   NR   591 | Per 2.5% relative decline in FVC over 3 months, odds ratio for disease progression in the placebo arms 1.30 (1.19 to 1.41)   |                                                                                                                                                                                                                                                            |                                                                                                                                                                          |
|                         |           |                               |                                                                            |            |     |                  | Disease progression (treatment arms)            | 6  | 1602   NR   406 | Per 2.5% relative decline in FVC over 3 months, odds ratio for disease progression in the treatment arms 1.46 (1.36 to 1.57) |                                                                                                                                                                                                                                                            |                                                                                                                                                                          |

1: Death within 12 months of baseline or 10% relative decline from baseline

**eTable 14. Secondary hyperparathyroidism**

| <b>Author<br/>, Year</b> | <b>Study<br/>desig<br/>n</b> | <b>Indication</b> | <b>Interventions</b> | <b>Funding<br/>source</b> | <b>Design<br/>of<br/>include<br/>d<br/>studies</b> | <b>Surrogate<br/>marker</b> | <b>Clinical<br/>outcome</b> | <b>No.<br/>studie<br/>s</b> | <b>Sample<br/>size  <br/>number<br/>of<br/>outcome<br/>s</b> | <b>Evidence</b> | <b>Author's<br/>conclusion</b> | <b>Plaintext<br/>Summary</b> |
|--------------------------|------------------------------|-------------------|----------------------|---------------------------|----------------------------------------------------|-----------------------------|-----------------------------|-----------------------------|--------------------------------------------------------------|-----------------|--------------------------------|------------------------------|
|--------------------------|------------------------------|-------------------|----------------------|---------------------------|----------------------------------------------------|-----------------------------|-----------------------------|-----------------------------|--------------------------------------------------------------|-----------------|--------------------------------|------------------------------|

|                            |      |                                      |                                                                               |            |     |                  |                          |    |                |                                                                                                                                                                                                                                                        |                                                                                                                                                                                                                                                                                                                                                                                                                                                                                      |                                                                                                                                                                                                                |
|----------------------------|------|--------------------------------------|-------------------------------------------------------------------------------|------------|-----|------------------|--------------------------|----|----------------|--------------------------------------------------------------------------------------------------------------------------------------------------------------------------------------------------------------------------------------------------------|--------------------------------------------------------------------------------------------------------------------------------------------------------------------------------------------------------------------------------------------------------------------------------------------------------------------------------------------------------------------------------------------------------------------------------------------------------------------------------------|----------------------------------------------------------------------------------------------------------------------------------------------------------------------------------------------------------------|
| Palmer, 2015 <sup>37</sup> | SRMA | Secondary hyperparathyroidism in CKD | Phosphate binders<br>cinacalcet<br>vitamin D<br>bisphosphonates<br>calcitonin | Government | RCT | Target serum PTH | All-cause mortality      | 12 | 3410   NA   NR | Pearson's correlation coefficient of the log relative risk of achieving a study-specific serum PTH target value between treatment and control arms and the log relative risk of all-cause mortality between those treatment arms: 0.12 (-0.61 to 0.73) | "We found that the effects of a broad range of drugs used widely in CKD to correct perturbed serum PTH...generally do not correlate with cardiovascular and all-cause mortality in randomized trials...drug effects on serum PTH...are weakly and imprecisely correlated with mortality in CKD at best...On the basis of these findings, the central role of surrogate biochemical markers of bone disease in the drug management of CKD appears to be of uncertain clinical value." | When looking across several studies, decreases in serum PTH was weakly and inconsistently associated with improvements in all-cause and cardiovascular mortality, though the trial length was generally short. |
|                            |      |                                      |                                                                               |            |     |                  | Cardiovascular mortality | 6  | 1637   NA   NR | Pearson's correlation coefficient of the log relative risk of achieving a study-specific serum PTH target value                                                                                                                                        |                                                                                                                                                                                                                                                                                                                                                                                                                                                                                      |                                                                                                                                                                                                                |



|  |  |  |  |  |  |                      |                     |    |                |                                                                                                                                                                                                               |  |  |
|--|--|--|--|--|--|----------------------|---------------------|----|----------------|---------------------------------------------------------------------------------------------------------------------------------------------------------------------------------------------------------------|--|--|
|  |  |  |  |  |  |                      |                     |    |                | between treatment and control arms and the log relative risk of all-cause mortality between those treatment arms: - 0.03 (- 0.91 to 0.91)                                                                     |  |  |
|  |  |  |  |  |  | Continuous serum PTH | All-cause mortality | 17 | 2845   NA   NR | Pearson's correlation coefficient of the ratio of mean serum PTH between treatment arms at trial end and the log relative risk of all-cause mortality between those treatment arms: - 0.69 (- 0.88 to - 0.18) |  |  |

|  |  |  |  |  |  |  |  |                          |   |               |                                                                                                                                                                                                           |  |  |
|--|--|--|--|--|--|--|--|--------------------------|---|---------------|-----------------------------------------------------------------------------------------------------------------------------------------------------------------------------------------------------------|--|--|
|  |  |  |  |  |  |  |  | Cardiovascular mortality | 5 | 796   NA   NR | Pearson's correlation coefficient of the ratio of mean serum PTH between treatment arms at trial end and the log relative risk of all-cause mortality between those treatment arms: -0.28 (-0.98 to 0.96) |  |  |
|--|--|--|--|--|--|--|--|--------------------------|---|---------------|-----------------------------------------------------------------------------------------------------------------------------------------------------------------------------------------------------------|--|--|

| eTable 15. Type 2 diabetes |              |            |               |                |                            |                  |                  |             |                                             |          |                     |                   |
|----------------------------|--------------|------------|---------------|----------------|----------------------------|------------------|------------------|-------------|---------------------------------------------|----------|---------------------|-------------------|
| Author, Year               | Study design | Indication | Interventions | Funding source | Design of included studies | Surrogate marker | Clinical outcome | No. studies | Overall sample size   No. surrogate measure | Evidence | Author's conclusion | Plaintext Summary |
|                            |              |            |               |                |                            |                  |                  |             |                                             |          |                     |                   |

|                            |                                        |      |                                                                                                                                                                                                                        |      |     |       |                     |     | es   No. clinical outcomes |                                                                                                                                                                                                                                                                                                                                                                                                                                                                                                  |                                                                                                                                                          |                                                                                                                                                                                                                    |
|----------------------------|----------------------------------------|------|------------------------------------------------------------------------------------------------------------------------------------------------------------------------------------------------------------------------|------|-----|-------|---------------------|-----|----------------------------|--------------------------------------------------------------------------------------------------------------------------------------------------------------------------------------------------------------------------------------------------------------------------------------------------------------------------------------------------------------------------------------------------------------------------------------------------------------------------------------------------|----------------------------------------------------------------------------------------------------------------------------------------------------------|--------------------------------------------------------------------------------------------------------------------------------------------------------------------------------------------------------------------|
| Baechle 2022 <sup>56</sup> | SRMA (secondary analysis of SRMA data) | T2DM | <p>α-glucosidase inhibitors</p> <p>basal insulin</p> <p>DPP-4 inhibitors</p> <p>GLP-1 receptor agonists</p> <p>meglitinide</p> <p>metformin</p> <p>SGLT2 inhibitors</p> <p>sulfonylureas</p> <p>thiazolidinediones</p> | None | RCT | HbA1c | All-cause mortality | 205 | 122245   NR   361          | <p>Regression coefficient for the estimation of the absolute change in HgA1c between treatment and control and risk difference in all-cause mortality between those arms -0.031% (-0.179% to 0.117%)</p> <p>Pearson's correlation coefficient: -0.089 (-0.232 to 0.060)</p> <p>Regression coefficient for the estimation of the absolute change in HgA1c between treatment and control and the change in log relative risk of all-cause mortality between those arms 0.129 (-0.043 to 0.302)</p> | "Based on the results of more than 200 randomized trials, HbA1c is not a valid surrogate marker for all-cause mortality in people with type 2 diabetes." | Using results from 205 RCTs, differences in HgA1c between treatment arms were not associated with risk ratio differences or changes in relative risk for all-cause mortality, though the number of events was low. |

|                          |      |      |                                                                                                                                                                                                                                                                       |            |     |  |                     |    |                     |                                                                                                                                                                                                                                                                                                                                                                                                |                                                                                                                                                |                                                                                                                                                                                                                                                                                                          |
|--------------------------|------|------|-----------------------------------------------------------------------------------------------------------------------------------------------------------------------------------------------------------------------------------------------------------------------|------------|-----|--|---------------------|----|---------------------|------------------------------------------------------------------------------------------------------------------------------------------------------------------------------------------------------------------------------------------------------------------------------------------------------------------------------------------------------------------------------------------------|------------------------------------------------------------------------------------------------------------------------------------------------|----------------------------------------------------------------------------------------------------------------------------------------------------------------------------------------------------------------------------------------------------------------------------------------------------------|
|                          |      |      |                                                                                                                                                                                                                                                                       |            |     |  |                     |    |                     | Pearson's correlation coefficient - 0.010 (-0.145 to 0.134)                                                                                                                                                                                                                                                                                                                                    |                                                                                                                                                |                                                                                                                                                                                                                                                                                                          |
| Huang 2022 <sup>60</sup> | SRMA | T2DM | Alogliptin<br>Linagliptin<br>Omarigliptin<br>Saxagliptin<br>Sitagliptin<br>Albiglutide<br>Dulaglutide<br>Efpeglenatide<br>Exenatide<br>Liraglutide<br>Lixisenatide<br>Semaglutide<br>Canagliflozin<br>Dapagliflozin<br>Empagliflozin<br>Ertugliflozin<br>Pioglitazone | Government | RCT |  | MACE <sup>1</sup>   | 18 | 155610   NA   15868 | Regression coefficient for the difference in change in HgA1c between treatment and placebo-control arms and the natural log relative risk of a major adverse cardiovascular events between those groups - 0.3911 (-0.5676 to -0.2147) p<0.0001<br><br>A 1% greater reduction in HgA1c between treatment and placebo control reduced the relative risk of MACE to 0.75 (0.68 to 0.83), p<0.0001 | "Risk reduction in MACE was proportional to the magnitude of HbA1c decrease conferred by antidiabetic agents with less hypoglycemic hazard..." | Across 18 placebo-controlled RCTs examining antidiabetic medications with lower risk of hypoglycemia, increased reductions in HgA1c were associated with lower chances of MACEs and various other clinical outcomes even when adjusted for the non-HbA1c beneficial effects of antidiabetic medications. |
|                          |      |      |                                                                                                                                                                                                                                                                       |            |     |  | Stroke <sup>1</sup> | 18 | 155610   NA   4041  | Regression coefficient for the difference in change in HgA1c between                                                                                                                                                                                                                                                                                                                           |                                                                                                                                                |                                                                                                                                                                                                                                                                                                          |



|  |  |  |  |  |  |  |                                             |    |                                  |                                                                                                                                                                                                                                                                                   |  |
|--|--|--|--|--|--|--|---------------------------------------------|----|----------------------------------|-----------------------------------------------------------------------------------------------------------------------------------------------------------------------------------------------------------------------------------------------------------------------------------|--|
|  |  |  |  |  |  |  |                                             |    | 0.7575 to<br>0.3286)<br>p=0.4390 |                                                                                                                                                                                                                                                                                   |  |
|  |  |  |  |  |  |  | CV mortality                                | 18 | 155610  <br>NA  <br>6861         | Regression<br>coefficient for<br>the difference<br>in change in<br>HgA1c<br>between<br>treatment and<br>placebo-control<br>arms and the<br>natural log<br>relative risk of<br>cardiovascular<br>death between<br>those groups -<br>0.2810 (-<br>0.5948 to<br>0.0327)<br>p=0.0791  |  |
|  |  |  |  |  |  |  | Composite<br>kidney<br>Outcome <sup>1</sup> | 14 | 133524  <br>NA  <br>8857         | Regression<br>coefficient for<br>the difference<br>in change in<br>HgA1c<br>between<br>treatment and<br>placebo-control<br>arms and the<br>natural log<br>relative risk of<br>composite<br>renal outcome<br>between those<br>groups -0.3405<br>(-0.7026 to<br>0.0216)<br>p=0.0653 |  |
|  |  |  |  |  |  |  | Retinopathy <sup>1</sup>                    | 10 | 82682  <br>NA  <br>1927          | Regression<br>coefficient for<br>the difference<br>in change in                                                                                                                                                                                                                   |  |







|                           |      |      |                                                                                                                                            |  |     |  |                     |    |                     |                                                                                                                                                                                                                                                                                                |                                                                                                                                                                                                                                                                                    |                                                                                                                                                                                                                                        |
|---------------------------|------|------|--------------------------------------------------------------------------------------------------------------------------------------------|--|-----|--|---------------------|----|---------------------|------------------------------------------------------------------------------------------------------------------------------------------------------------------------------------------------------------------------------------------------------------------------------------------------|------------------------------------------------------------------------------------------------------------------------------------------------------------------------------------------------------------------------------------------------------------------------------------|----------------------------------------------------------------------------------------------------------------------------------------------------------------------------------------------------------------------------------------|
|                           |      |      | metformin<br>SGLT-2 inhibitors<br>SGLT-2 inhibitor +<br>sulfonylureas<br>sulfonylurea + insulin<br>thiazolidinediones                      |  |     |  |                     |    |                     | to 1.0820),<br>p=0.162                                                                                                                                                                                                                                                                         |                                                                                                                                                                                                                                                                                    |                                                                                                                                                                                                                                        |
|                           |      |      |                                                                                                                                            |  |     |  |                     |    |                     | For a 1% greater reduction in HbA1c in the active arm compared to control, hazard ratio of MACE in a bivariate analysis 0.8979 (0.7249 to 1.0171), p=0.109<br><br>In a multivariate analysis adjusted for drug type, time since diagnosis, and trial length 0.8837 (0.7019 to 0.9991), p=0.049 |                                                                                                                                                                                                                                                                                    |                                                                                                                                                                                                                                        |
| Rivera 2021 <sup>62</sup> | SRMA | T2DM | pioglitazone<br>alogliptin<br>linagliptin<br>omarigliptin<br>saxagliptin<br>sitagliptin<br>canagliflozin<br>dapagliflozin<br>empagliflozin |  | RCT |  | All-cause mortality | 19 | 163170   NA   11111 | Pearson's correlation coefficient for the mean difference in HbA1c between treatment and placebo control and relative risk of mortality 0.339 (-0.136 to 0.687), p=0.156; R <sup>2</sup> 0.115                                                                                                 | "Using data from placebo-controlled RCTs (n = 19) and trial-level linear regression analysis, the findings of this study show that a reduction in HbA1c does not reliably predict a reduction in the relative risk of mortality, myocardial infarction, stroke, heart failure, and | Across 19 placebo-controlled RCTs, differences in HbA1c between treatment and control did not reliably correlate with changes in the risk of mortality, MI, stroke, HF, or kidney injury, though there was a statistically significant |

|  |  |  |                                                                                                                       |  |  |                     |    |                    |                                                                                                                                                                                                                                                                                                                                                  |                                                                                                                                                                                                                                                                                                                                     |                                       |
|--|--|--|-----------------------------------------------------------------------------------------------------------------------|--|--|---------------------|----|--------------------|--------------------------------------------------------------------------------------------------------------------------------------------------------------------------------------------------------------------------------------------------------------------------------------------------------------------------------------------------|-------------------------------------------------------------------------------------------------------------------------------------------------------------------------------------------------------------------------------------------------------------------------------------------------------------------------------------|---------------------------------------|
|  |  |  | ertugliflozin<br>albiglutide<br>dulaglutide<br>exenatide<br>liraglutide<br>lixisenatide<br>semaglutide<br>aleglitazar |  |  |                     |    |                    | Regression coefficient for the mean difference in HbA1c between treatment and placebo control and log relative risk of mortality 0.320 (-0.151 to 0.791)                                                                                                                                                                                         | kidney injury in type 2 DM (DM2) trials. Even though a statistically significant association was found between stroke and HbA1c, the strength of the association did not reach the cut-off point established for HbA1c to be considered a valid surrogate (lower limit of 95 percent CI of <i>R</i> greater than or equal to .85)." | correlation between HbA1c and stroke. |
|  |  |  |                                                                                                                       |  |  | MI <sup>1</sup>     | 18 | 158769   NA   7956 | Pearson's correlation coefficient for the mean difference in HbA1c between treatment and placebo control and relative risk of MI 0.199 (-0.295 to 0.609), p=0.892; R <sup>2</sup> 0.040<br><br>Regression coefficient for the mean difference in HbA1c between treatment and placebo control and log relative risk of MI 0.142 (-0.209 to 0.493) |                                                                                                                                                                                                                                                                                                                                     |                                       |
|  |  |  |                                                                                                                       |  |  | Stroke <sup>1</sup> | 17 | 155586   NA   4075 | Pearson's correlation coefficient for the mean difference in HbA1c                                                                                                                                                                                                                                                                               |                                                                                                                                                                                                                                                                                                                                     |                                       |

|  |  |  |  |  |  |  |                        |    |                    |                                                                                                                                                                                                                                                                                                               |  |  |
|--|--|--|--|--|--|--|------------------------|----|--------------------|---------------------------------------------------------------------------------------------------------------------------------------------------------------------------------------------------------------------------------------------------------------------------------------------------------------|--|--|
|  |  |  |  |  |  |  |                        |    |                    | <p>between treatment and placebo control and relative risk of stroke 0.811 (0.541 to 0.929), p&lt;0.001; R<sup>2</sup> 0.657</p> <p>Regression coefficient for the mean difference in HbA1c between treatment and placebo control and log relative risk of stroke 0.789 (0.494 to 1.083)</p>                  |  |  |
|  |  |  |  |  |  |  | HF events <sup>1</sup> | 18 | 153707   NA   5248 | <p>Pearson's correlation coefficient for the mean difference in HbA1c between treatment and placebo control and relative risk of heart failure 0.079 (-0.403 to 0.526), p=0.755; R<sup>2</sup> 0.006</p> <p>Regression coefficient for the mean difference in HbA1c between treatment and placebo control</p> |  |  |

|                             |      |      |                                                                                                    |      |     |  |                            |    |                                                                |                                                                                                                                                                                                                                                                                                                                                                               |                                                                                                                                                                                                            |                                                                                                                                                                                          |
|-----------------------------|------|------|----------------------------------------------------------------------------------------------------|------|-----|--|----------------------------|----|----------------------------------------------------------------|-------------------------------------------------------------------------------------------------------------------------------------------------------------------------------------------------------------------------------------------------------------------------------------------------------------------------------------------------------------------------------|------------------------------------------------------------------------------------------------------------------------------------------------------------------------------------------------------------|------------------------------------------------------------------------------------------------------------------------------------------------------------------------------------------|
|                             |      |      |                                                                                                    |      |     |  |                            |    | and log relative risk of heart failure 0.094 (-0.744 to 0.933) |                                                                                                                                                                                                                                                                                                                                                                               |                                                                                                                                                                                                            |                                                                                                                                                                                          |
|                             |      |      |                                                                                                    |      |     |  | Kidney injury <sup>3</sup> | 16 | 147662   NA   6432                                             | <p>Pearson's correlation coefficient for the mean difference in HbA1c between treatment and placebo control and relative risk of kidney injury -0.037 (-0.523 to 0.467), p=0.892; R<sup>2</sup> 0.001</p> <p>Regression coefficient for the mean difference in HbA1c between treatment and placebo control and log relative risk of kidney injury 0.160 (-1.244 to 1.563)</p> |                                                                                                                                                                                                            |                                                                                                                                                                                          |
| Maiorino 2021 <sup>61</sup> | SRMA | T2DM | alogliptin<br>linagliptin<br>saxagliptin<br>sitagliptin<br>albiglutide<br>dulaglutide<br>exenatide | None | RCT |  | MACE <sup>2</sup>          | 18 | 161156   NA   NR                                               | Regression coefficient for the difference in achieved HbA1c at trial end between treatment and control and log hazard ratio of MACE -0.298, p=0.007; R <sup>2</sup> 0.97                                                                                                                                                                                                      | "The results of the meta-regression analysis of the 18 CVOTs in 161,156 patients with type 2 diabetes show that the reduction of HbA1c during treatment with DPP-4i, GLP-1RA or SGLT-2i is associated with | Across 18 placebo-controlled RCTs, greater reductions in end-treatment HbA1c were associated with improved outcomes for MACE, driven nearly entirely by non-fatal stroke risk reduction. |

|  |  |  |                                                                                                                 |  |  |  |  |  |  |                                                                                                                                                                            |                                                                                                                                                                                                                                                                                                                     |  |
|--|--|--|-----------------------------------------------------------------------------------------------------------------|--|--|--|--|--|--|----------------------------------------------------------------------------------------------------------------------------------------------------------------------------|---------------------------------------------------------------------------------------------------------------------------------------------------------------------------------------------------------------------------------------------------------------------------------------------------------------------|--|
|  |  |  | liraglutide<br>lixisenatide<br>semaglutide<br>canagliflozin<br>empagliflozin<br>ertugliflozin<br>Ssotagliflozin |  |  |  |  |  |  | For every 1% greater difference in HbA1c at trial end between treatment and control, the risk of MACE decreased by 0.26                                                    | reduction of MACE, explaining almost all ( $R^2 = 97\%$ ) of the between-study variance. The risk reduction of MACE was almost completely driven by the reduction of non-fatal stroke, whose association explains 100% of between-study variance, and is unique in holding this relationship among MACE components" |  |
|  |  |  |                                                                                                                 |  |  |  |  |  |  | Regression coefficient for the difference in achieved HbA1c at trial end between treatment and control and log hazard ratio of CV death - 0.176, $p=0.311$ ; $R^2 .04$     |                                                                                                                                                                                                                                                                                                                     |  |
|  |  |  |                                                                                                                 |  |  |  |  |  |  | Regression coefficient for the difference in achieved HbA1c at trial end between treatment and control and log hazard ratio of non-fatal MI - 0.181, $p=0.256$ ; $R^2 .03$ |                                                                                                                                                                                                                                                                                                                     |  |
|  |  |  |                                                                                                                 |  |  |  |  |  |  | Regression coefficient for the difference in achieved HbA1c at trial end between treatment and control and log hazard ratio of non-fatal stroke                            |                                                                                                                                                                                                                                                                                                                     |  |



|                            |      |  |                                                                                                                                                                                                      |      |     |  |                                  |                     |                           |                                                                                                                                                                                                                                                                                                                        |                                                                                                                                                                                                                                                                                             |                                                                                                                                                                            |  |
|----------------------------|------|--|------------------------------------------------------------------------------------------------------------------------------------------------------------------------------------------------------|------|-----|--|----------------------------------|---------------------|---------------------------|------------------------------------------------------------------------------------------------------------------------------------------------------------------------------------------------------------------------------------------------------------------------------------------------------------------------|---------------------------------------------------------------------------------------------------------------------------------------------------------------------------------------------------------------------------------------------------------------------------------------------|----------------------------------------------------------------------------------------------------------------------------------------------------------------------------|--|
| Ambrosi 2020 <sup>55</sup> | SRMA |  | alogliptin<br>linagliptin<br>omarigliptin<br>saxagliptin<br>sitagliptin<br>albiglutide<br>exenatide<br>liraglutide<br>lixisenatide<br>semaglutide<br>canagliflozin<br>eapagliflozin<br>empagliflozin | None | RCT |  | MACE <sup>2</sup>                | 14                  | 128149  <br>NA  <br>12114 | In a univariate analysis, Pearson's correlation coefficient between mean difference in HbA1c reduction between treatment and placebo control and relative difference in MACE between those arms r=0.88 (0.67 to 0.97), p<0.001<br><br>In a bivariate analysis adjusting for weight loss in 13 of those trials: p=0.019 | "Our analysis finds an association between HbA1c reduction and MACE decrease across CVOT and this association is still significant when taking into account weight loss. This result supports the usefulness of HbA1c as a surrogate marker for the prevention of cardiovascular outcomes." | Across 14 placebo-controlled RCTs examining cardiovascular outcomes, greater reductions in HgA1c between treatment and control were associated with lower rates of MACEs.  |  |
| Fralick 2020 <sup>59</sup> | SRMA |  | dapagliflozin<br>linagliptin<br>alogliptin<br>sitagliptin<br>saxagliptin<br>albiglutide<br>lixisenatide<br>liraglutide<br>semaglutide<br>dulaglutide<br>exenatide                                    | None | RCT |  | Composite CV events <sup>4</sup> | 14                  | "Over 130000"             | For a 0.5% greater reduction in HbA1c in the treatment vs. placebo control arm, the hazard ratio between those arms 0.83 (0.72 to 0.94)                                                                                                                                                                                | "Our study provides further support that reducing the risk of cardiovascular events for adults with diabetes is only partly associated with changes in HbA1c"                                                                                                                               | Across 14 placebo-controlled RCTs, greater reductions in HbA1c at end of trial were associated with decreased rates of cardiovascular events, but not all-cause mortality. |  |
|                            |      |  |                                                                                                                                                                                                      |      |     |  |                                  | All-cause mortality |                           |                                                                                                                                                                                                                                                                                                                        | For a 0.5% greater reduction in HbA1c in the treatment vs. placebo control arm, the hazard ratio between those arms                                                                                                                                                                         |                                                                                                                                                                            |  |

|                                |      |      |                                                                                                    |                                    |     |                            |                         |                    |                                                                                                                                                                                                                                                 |                                                                                                                                                                                                                                                                                                        |                                                                                                                                                                                                                                                                                                                                                                                                                                |                                                                                                                                                                                                                                                                                                                                                                                                                               |
|--------------------------------|------|------|----------------------------------------------------------------------------------------------------|------------------------------------|-----|----------------------------|-------------------------|--------------------|-------------------------------------------------------------------------------------------------------------------------------------------------------------------------------------------------------------------------------------------------|--------------------------------------------------------------------------------------------------------------------------------------------------------------------------------------------------------------------------------------------------------------------------------------------------------|--------------------------------------------------------------------------------------------------------------------------------------------------------------------------------------------------------------------------------------------------------------------------------------------------------------------------------------------------------------------------------------------------------------------------------|-------------------------------------------------------------------------------------------------------------------------------------------------------------------------------------------------------------------------------------------------------------------------------------------------------------------------------------------------------------------------------------------------------------------------------|
|                                |      |      |                                                                                                    |                                    |     |                            |                         |                    |                                                                                                                                                                                                                                                 | 0.92 (0.73 to 1.17)                                                                                                                                                                                                                                                                                    |                                                                                                                                                                                                                                                                                                                                                                                                                                |                                                                                                                                                                                                                                                                                                                                                                                                                               |
| Thomopoulos 2019 <sup>63</sup> | SRMA | T2DM | insulin<br>metformin<br>GLP-1 agonists<br>DPP-4 inhibitors<br>PPAR antagonists<br>SGLT2 inhibitors | None; industry competing interests | RCT |                            | CHD events <sup>5</sup> | ≤25                | 174235   NA   8619                                                                                                                                                                                                                              | Regression coefficient for the end-trial HbA1c between treatment and control and the natural log of the risk ratio of CHD events between those groups -0.012, p=0.063<br><br>For a 0.52% reduction in HbA1c, risk ratio of CHD events in 20 trials after controlling for BP change 0.92 (0.88 to 0.95) | "Treatment to lower glucose levels is associated with reduced risk of CHD, major cardiovascular events and increased risk of treatment-related discontinuations after adjustment for the ongoing BP difference. No reduction in mortality was noticed in the same setting. Risk change of the composite of CHD and stroke, as well as treatment-related discontinuations is linearly related to the extent of HbA1c-lowering." | Across 25 placebo-controlled RCTs, greater reductions in HbA1c were associated with decreased risks of major cardiovascular events and stroke, as well as increased risk of treatment discontinuation even when accounting for changes in BP over that same time. However, there was no statistical association between changes in HbA1c between those arms and all-cause mortality, CV mortality, or hospitalization for HF. |
|                                |      |      |                                                                                                    |                                    |     | Fatal and non-fatal stroke |                         | 174235   NA   4714 | Regression coefficient for the end-trial HbA1c between treatment and control and the natural log of the risk ratio of fatal and non-fatal stroke between those groups -0.040, p=0.68<br><br>For a 0.52% reduction in HbA1c, risk ratio of fatal |                                                                                                                                                                                                                                                                                                        |                                                                                                                                                                                                                                                                                                                                                                                                                                |                                                                                                                                                                                                                                                                                                                                                                                                                               |





|  |  |  |  |  |  |  |  |  |                                                                                 |                                                                                                                                                                   |                                                                                                                                                                                                        |  |  |
|--|--|--|--|--|--|--|--|--|---------------------------------------------------------------------------------|-------------------------------------------------------------------------------------------------------------------------------------------------------------------|--------------------------------------------------------------------------------------------------------------------------------------------------------------------------------------------------------|--|--|
|  |  |  |  |  |  |  |  |  |                                                                                 | groups 0.006, p=0.049                                                                                                                                             |                                                                                                                                                                                                        |  |  |
|  |  |  |  |  |  |  |  |  |                                                                                 | For a 0.52% reduction in HbA1c, risk ratio of CHD events or fatal or non-fatal stroke in 22 trials after controlling for BP change 0.95 (0.91 to 0.98)            |                                                                                                                                                                                                        |  |  |
|  |  |  |  |  |  |  |  |  | CHD events <sup>5</sup> , fatal or non-fatal stroke, and hospitalization for HF | 174235   NA   19452                                                                                                                                               | Regression coefficient for the end-trial HbA1c between treatment and control and the natural log of the risk ratio of CHD events, stroke, or hospitalization for HF between those groups 0.042, p=0.43 |  |  |
|  |  |  |  |  |  |  |  |  |                                                                                 | For a 0.52% reduction in HbA1c, risk ratio of CHD events, fatal or non-fatal stroke or hospitalization for HF after controlling for BP change 0.95 (0.90 to 0.99) |                                                                                                                                                                                                        |  |  |

|  |  |  |  |  |  |  |                     |  |                           |                                                                                                                                                                                                                                                                                                                 |  |
|--|--|--|--|--|--|--|---------------------|--|---------------------------|-----------------------------------------------------------------------------------------------------------------------------------------------------------------------------------------------------------------------------------------------------------------------------------------------------------------|--|
|  |  |  |  |  |  |  | CV mortality        |  | 174235  <br>NA  <br>7755  | <p>Regression coefficient for the end-trial HbA1c between treatment and control and the natural log of the risk ratio of CV mortality between those groups 0.014, <math>p=0.35</math></p> <p>For a 0.52% reduction in HbA1c, risk ratio of CV mortality after controlling for BP change 0.94 (0.88 to 1.02)</p> |  |
|  |  |  |  |  |  |  | All-cause mortality |  | 174235  <br>NA  <br>13852 | <p>Regression coefficient for the end-trial HbA1c between treatment and control and the natural log of the risk ratio of all-cause mortality between those groups -0.12, <math>p=0.31</math></p> <p>For a 0.52% reduction in HbA1c, risk ratio of all-cause mortality after controlling for BP change</p>       |  |

|                                     |      |      |                                                                                                                                    |      |     |  |                     |   |                     |                                                                                                                                                                            |                                                                                                                                                                                                                                                                           |                                                                                                                                                                                                                                          |
|-------------------------------------|------|------|------------------------------------------------------------------------------------------------------------------------------------|------|-----|--|---------------------|---|---------------------|----------------------------------------------------------------------------------------------------------------------------------------------------------------------------|---------------------------------------------------------------------------------------------------------------------------------------------------------------------------------------------------------------------------------------------------------------------------|------------------------------------------------------------------------------------------------------------------------------------------------------------------------------------------------------------------------------------------|
|                                     |      |      |                                                                                                                                    |      |     |  |                     |   | 0.95 (0.90 to 1.01) |                                                                                                                                                                            |                                                                                                                                                                                                                                                                           |                                                                                                                                                                                                                                          |
| Bejan-Angoulvant 2015 <sup>57</sup> | SMRA | T2DM | insulin<br>metformin<br>saxagliptin<br>alogliptin<br>aleglitazar<br>gliclazide<br>pioglitazone<br>rosiglitazone<br>sulphonylureas. | None | RCT |  | All-cause mortality | 7 | NR   NA   NR        | Regression coefficient for the difference in HbA1c between treatment and control at trial end and log odds ratio of mortality between those arms 0.222 (SE 0.168), p=0.242 | "However, our analysis could find no significant relationship between the decrease in HbA1c, observed in RCTs evaluating glucose-lowering regimens and rates of total or cardiovascular mortality, or any cardiovascular or microvascular complications in T2D patients." | Across several RCTs on more intensive versus less intensive antidiabetic regimens, greater improvement in HbA1c was not associated with improved clinical outcomes, though the number of studies included in the analysis was not large. |
|                                     |      |      |                                                                                                                                    |      |     |  | CV mortality        | 8 | 33396   NA   NR     | Regression coefficient for the difference in HbA1c between treatment and control at trial end and log odds ratio of mortality between those arms 0.367 (SE 0.231), p=0.164 |                                                                                                                                                                                                                                                                           |                                                                                                                                                                                                                                          |
|                                     |      |      |                                                                                                                                    |      |     |  | MI <sup>1</sup>     | 7 | NR   NA   NR        | Regression coefficient for the difference in HbA1c between treatment and control at trial end and log odds ratio of mortality between those arms -0.098                    |                                                                                                                                                                                                                                                                           |                                                                                                                                                                                                                                          |

|  |  |  |  |  |  |  |                            |   |                        |                                                                                                                                                                            |  |  |
|--|--|--|--|--|--|--|----------------------------|---|------------------------|----------------------------------------------------------------------------------------------------------------------------------------------------------------------------|--|--|
|  |  |  |  |  |  |  |                            |   | (SE 0.142),<br>p=0.518 |                                                                                                                                                                            |  |  |
|  |  |  |  |  |  |  | Fatal and non-fatal stroke | 7 | NR   NA<br>  NR        | Regression coefficient for the difference in HbA1c between treatment and control at trial end and log odds ratio of mortality between those arms 0.114 (SE 0.194), p=0.584 |  |  |
|  |  |  |  |  |  |  | HF                         | 8 | 33396   NA   NR        | Regression coefficient for the difference in HbA1c between treatment and control at trial end and log odds ratio of mortality between those arms 0.020 (SE 0.274), p=0.945 |  |  |
|  |  |  |  |  |  |  | Microalbuminuria           | 6 | NR   NA<br>  NR        | Regression coefficient for the difference in HbA1c between treatment and control at trial end and log odds ratio of mortality between those arms -0.307                    |  |  |

|  |  |  |  |  |  |  |                                         |   |                        |                                                                                                                                                                             |  |  |
|--|--|--|--|--|--|--|-----------------------------------------|---|------------------------|-----------------------------------------------------------------------------------------------------------------------------------------------------------------------------|--|--|
|  |  |  |  |  |  |  |                                         |   | (SE 0.138),<br>p=0.091 |                                                                                                                                                                             |  |  |
|  |  |  |  |  |  |  | Neuropathy                              | 6 | NR   NA<br>  NR        | Regression coefficient for the difference in HbA1c between treatment and control at trial end and log odds ratio of mortality between those arms -0.135 (SE 0.085), p=0.188 |  |  |
|  |  |  |  |  |  |  | Peripheral vascular events <sup>6</sup> | 6 | NR   NA<br>  NR        | Regression coefficient for the difference in HbA1c between treatment and control at trial end and log odds ratio of mortality between those arms -0.189 (SE 0.241), p=0.477 |  |  |
|  |  |  |  |  |  |  | Severe hypoglycemia                     | 5 | NR   NA<br>  NR        | Regression coefficient for the difference in HbA1c between treatment and control at trial end and log odds ratio of mortality between those arms 0.606 (SE                  |  |  |

|  |  |  |  |  |  |  |  |  |  |  |                    |  |  |
|--|--|--|--|--|--|--|--|--|--|--|--------------------|--|--|
|  |  |  |  |  |  |  |  |  |  |  | 0.307),<br>p=0.143 |  |  |
|--|--|--|--|--|--|--|--|--|--|--|--------------------|--|--|

MACE: Major adverse cardiovascular event; HF: Heart Failure

1: Defined individually by each study

2: Defined as non-fatal MI, non-fatal stroke, cardiovascular death

3: Defined variably by each study as a composite outcome including various parameters, including persistent macroalbuminuria, doubling of creatinine level, initiation of dialysis, kidney transplantation, initiation of renal replacement therapy, reduction of estimated glomerular filtration rate  $\geq 30\%$ , ESRD, and death from kidney disease

4: Defined as non-fatal MI, non-fatal stroke, cardiovascular death in 12 of those studies

5: Defined as non-fatal MI, coronary death

6: Defined as leg revascularization, peripheral arterial disease or intermittent claudication

**eFigure 1. Asthma**

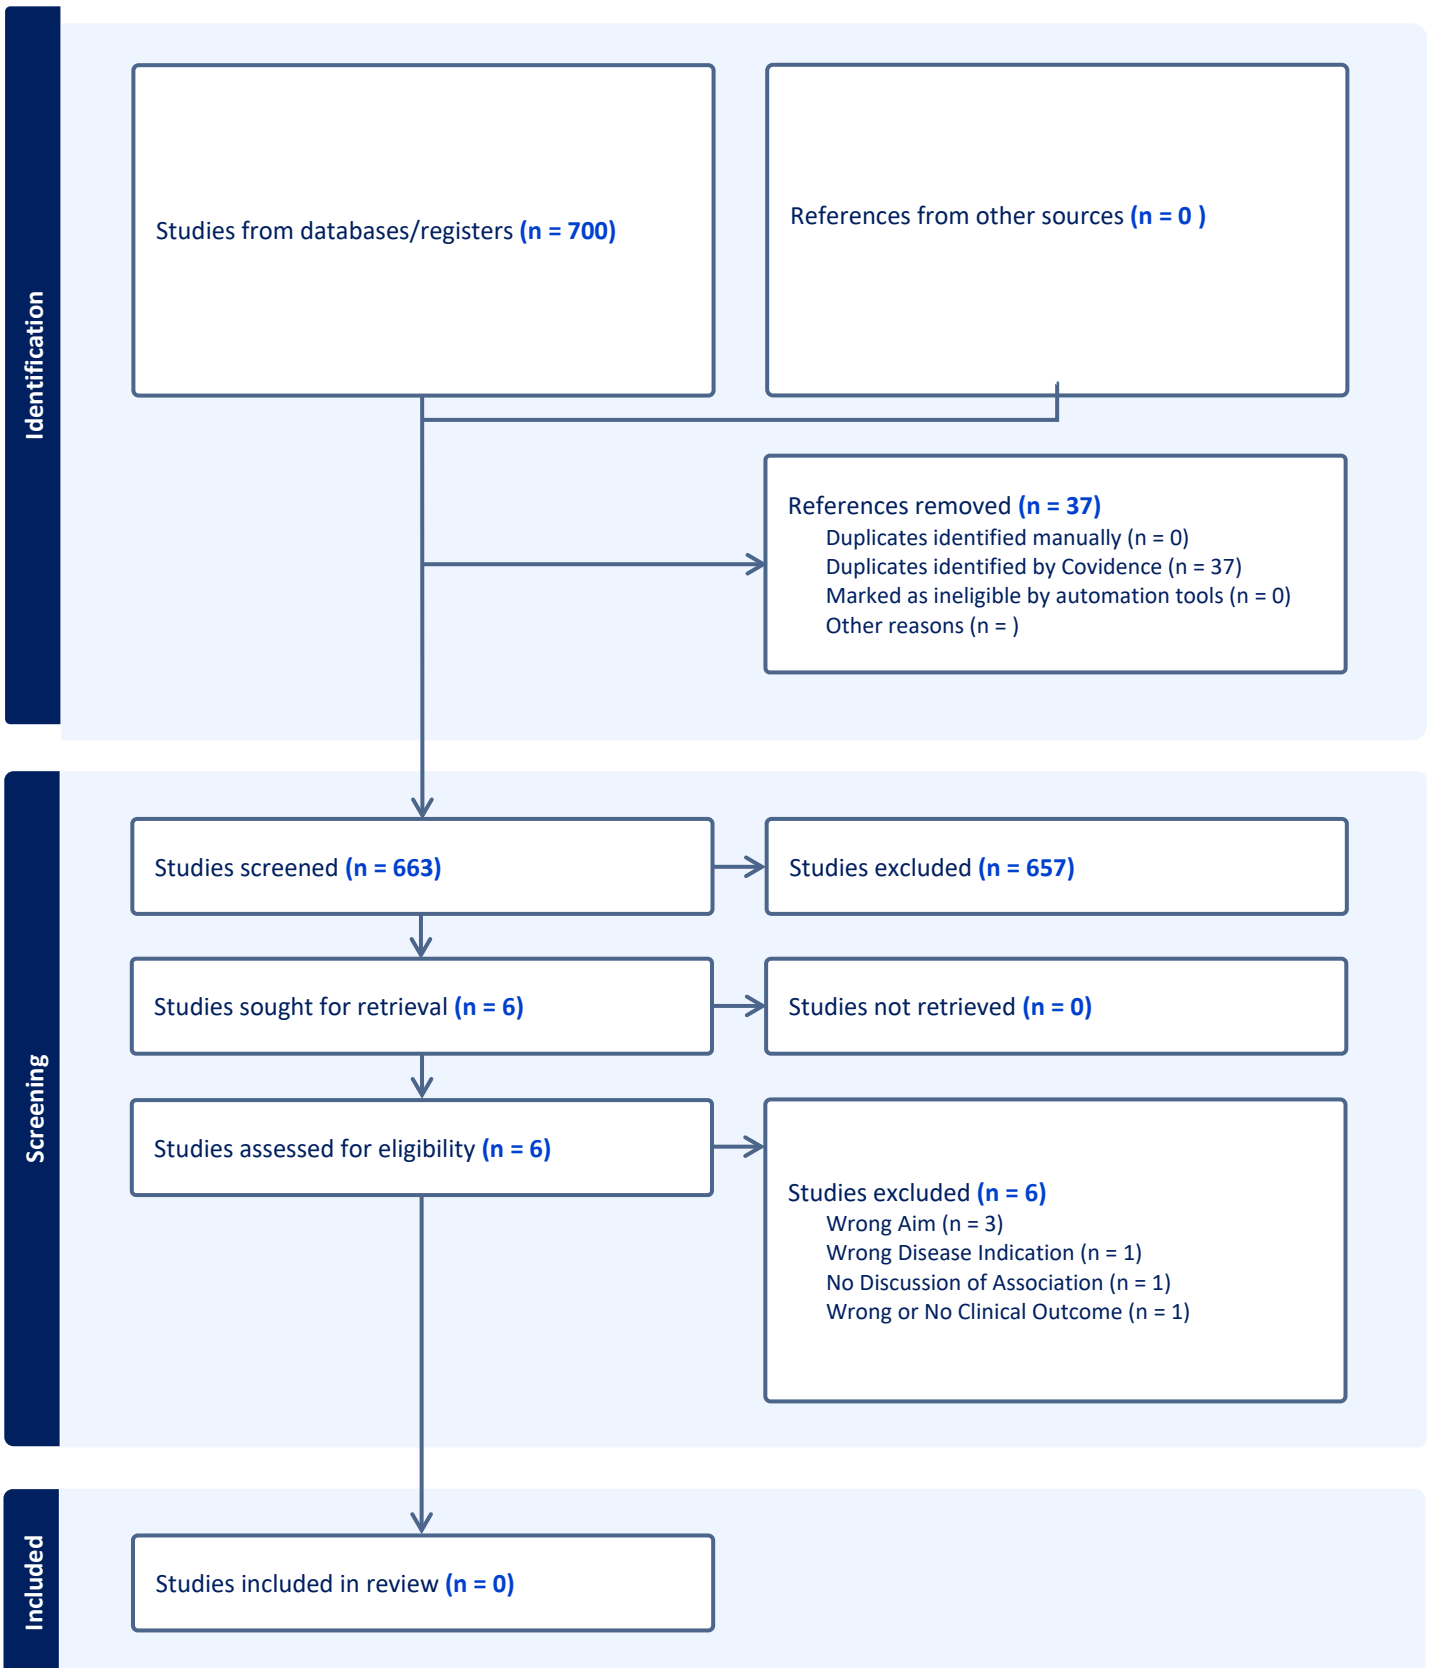



**eFigure 2. Cushing's Disease / Cushing's Syndrome**

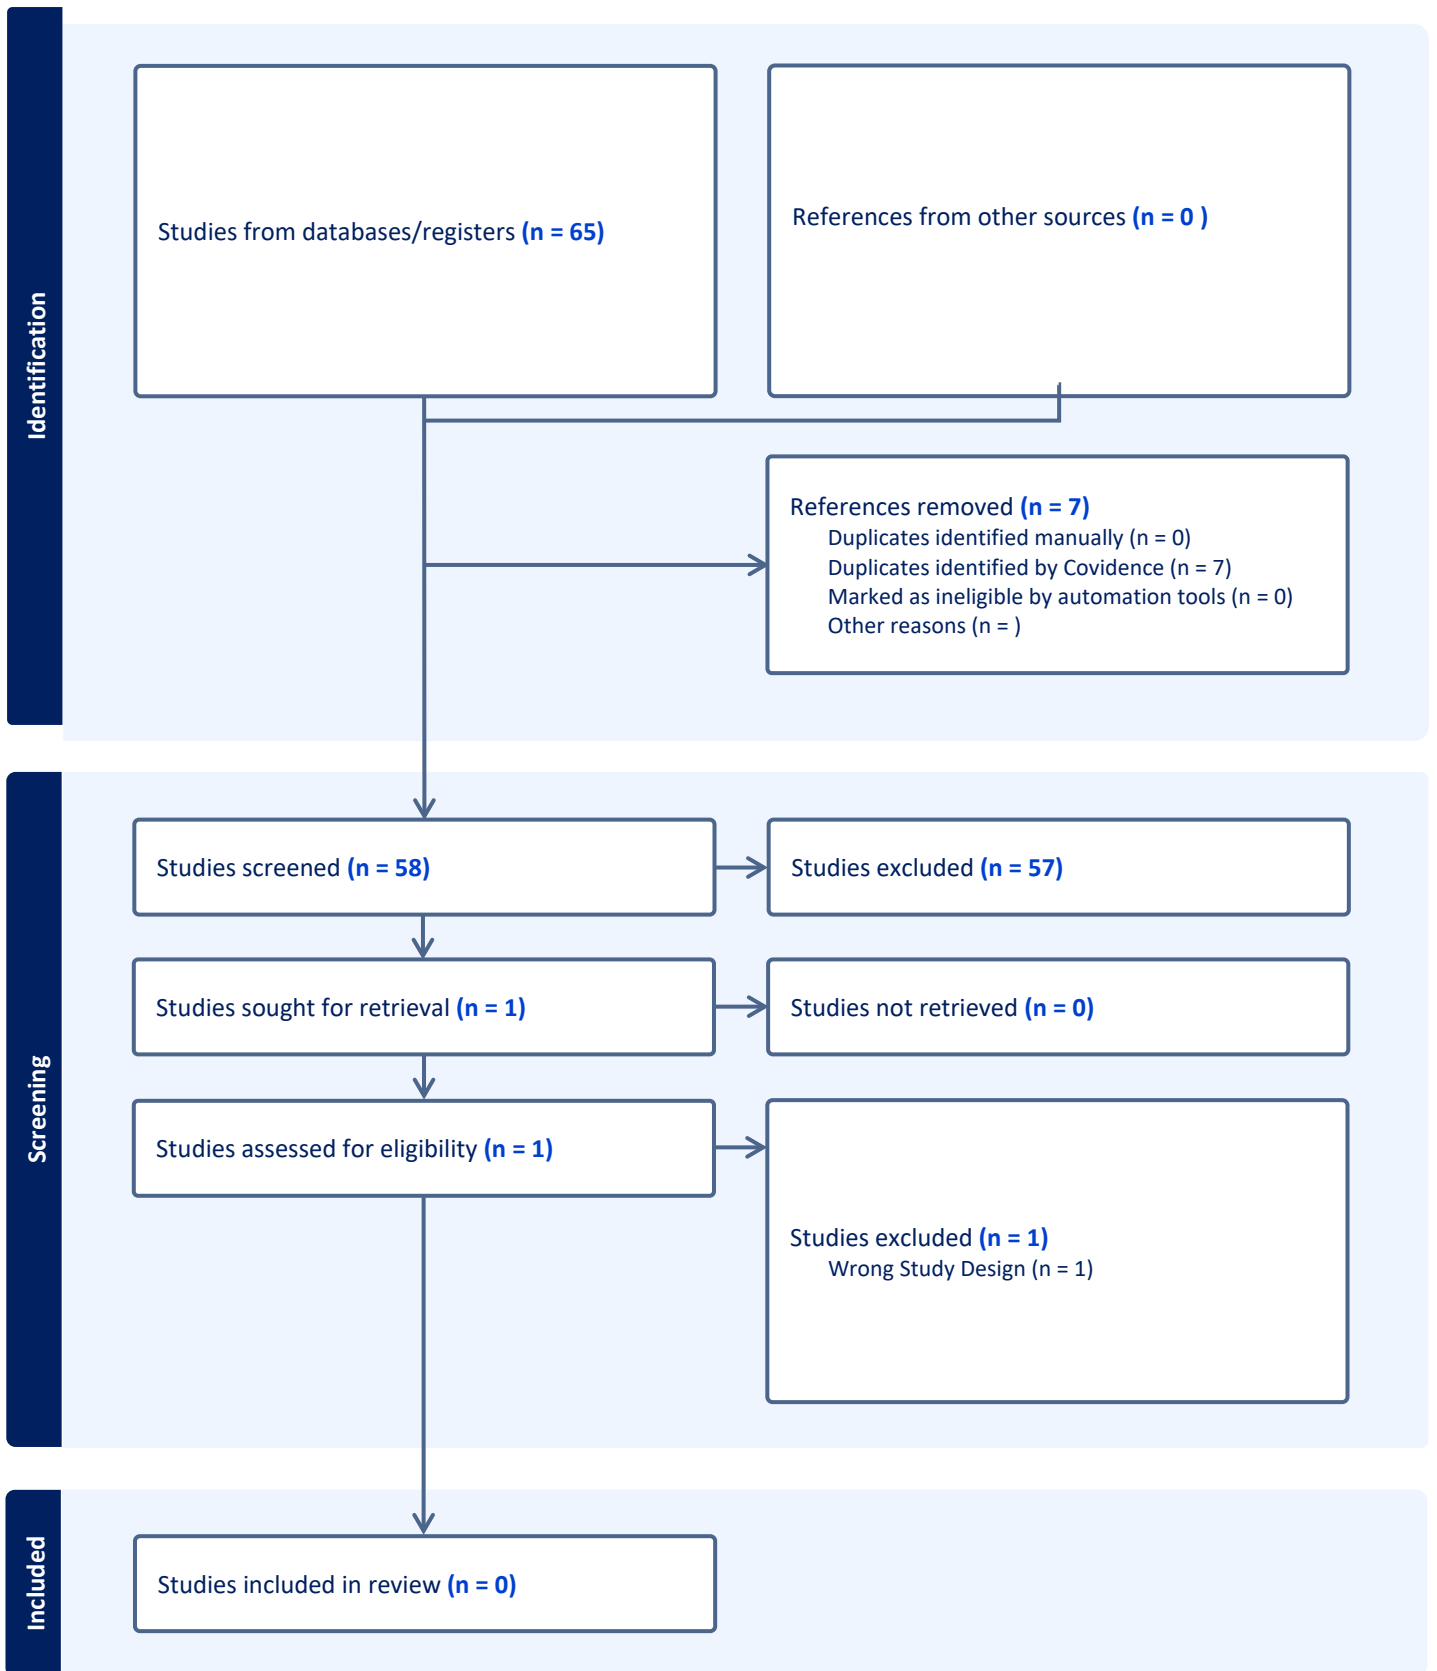

### eFigure 3. Exocrine Pancreatic Insufficiency

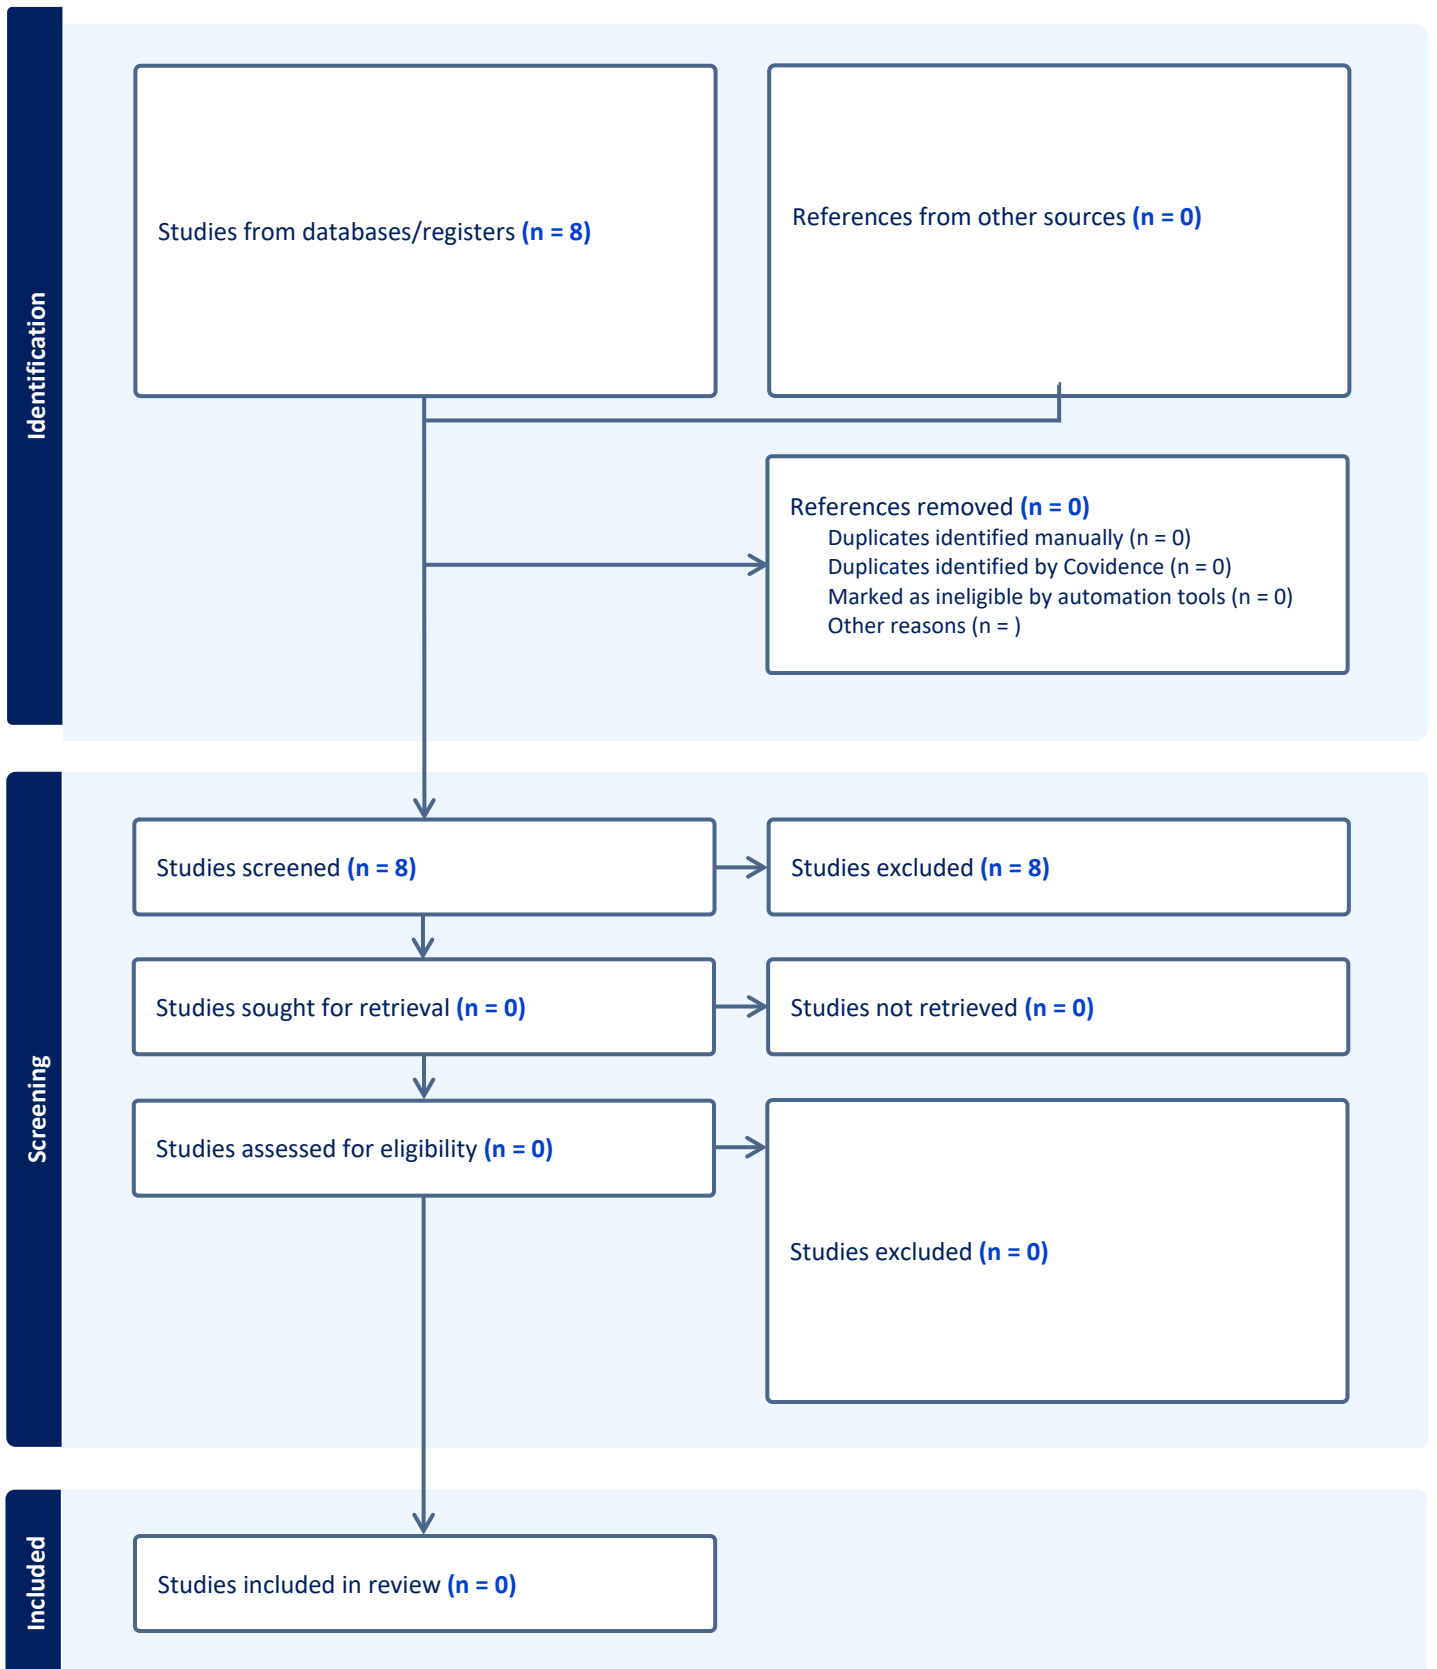

### eFigure 4. Hepatitis B

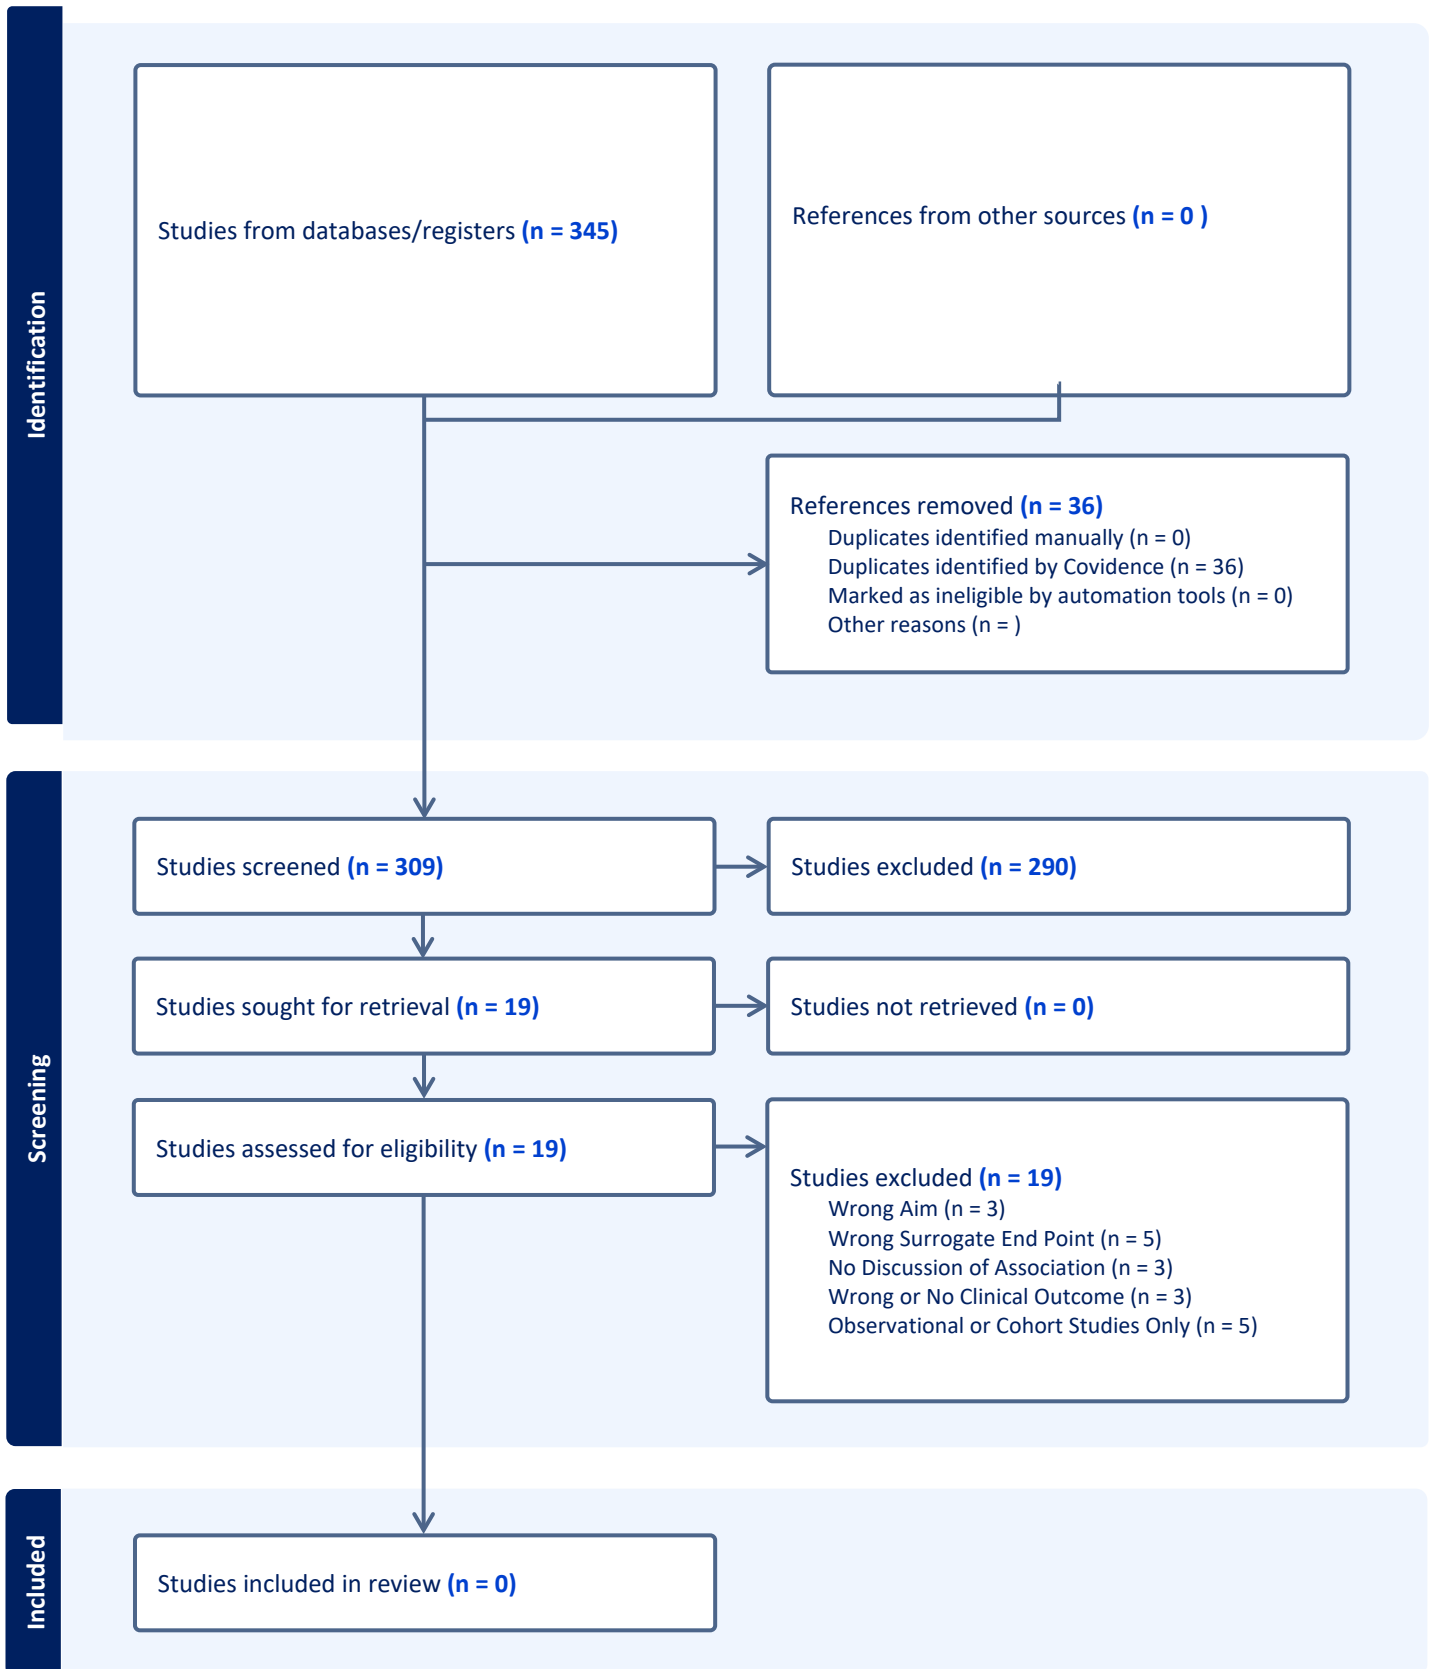

**eFigure 5. Hepatitis C**

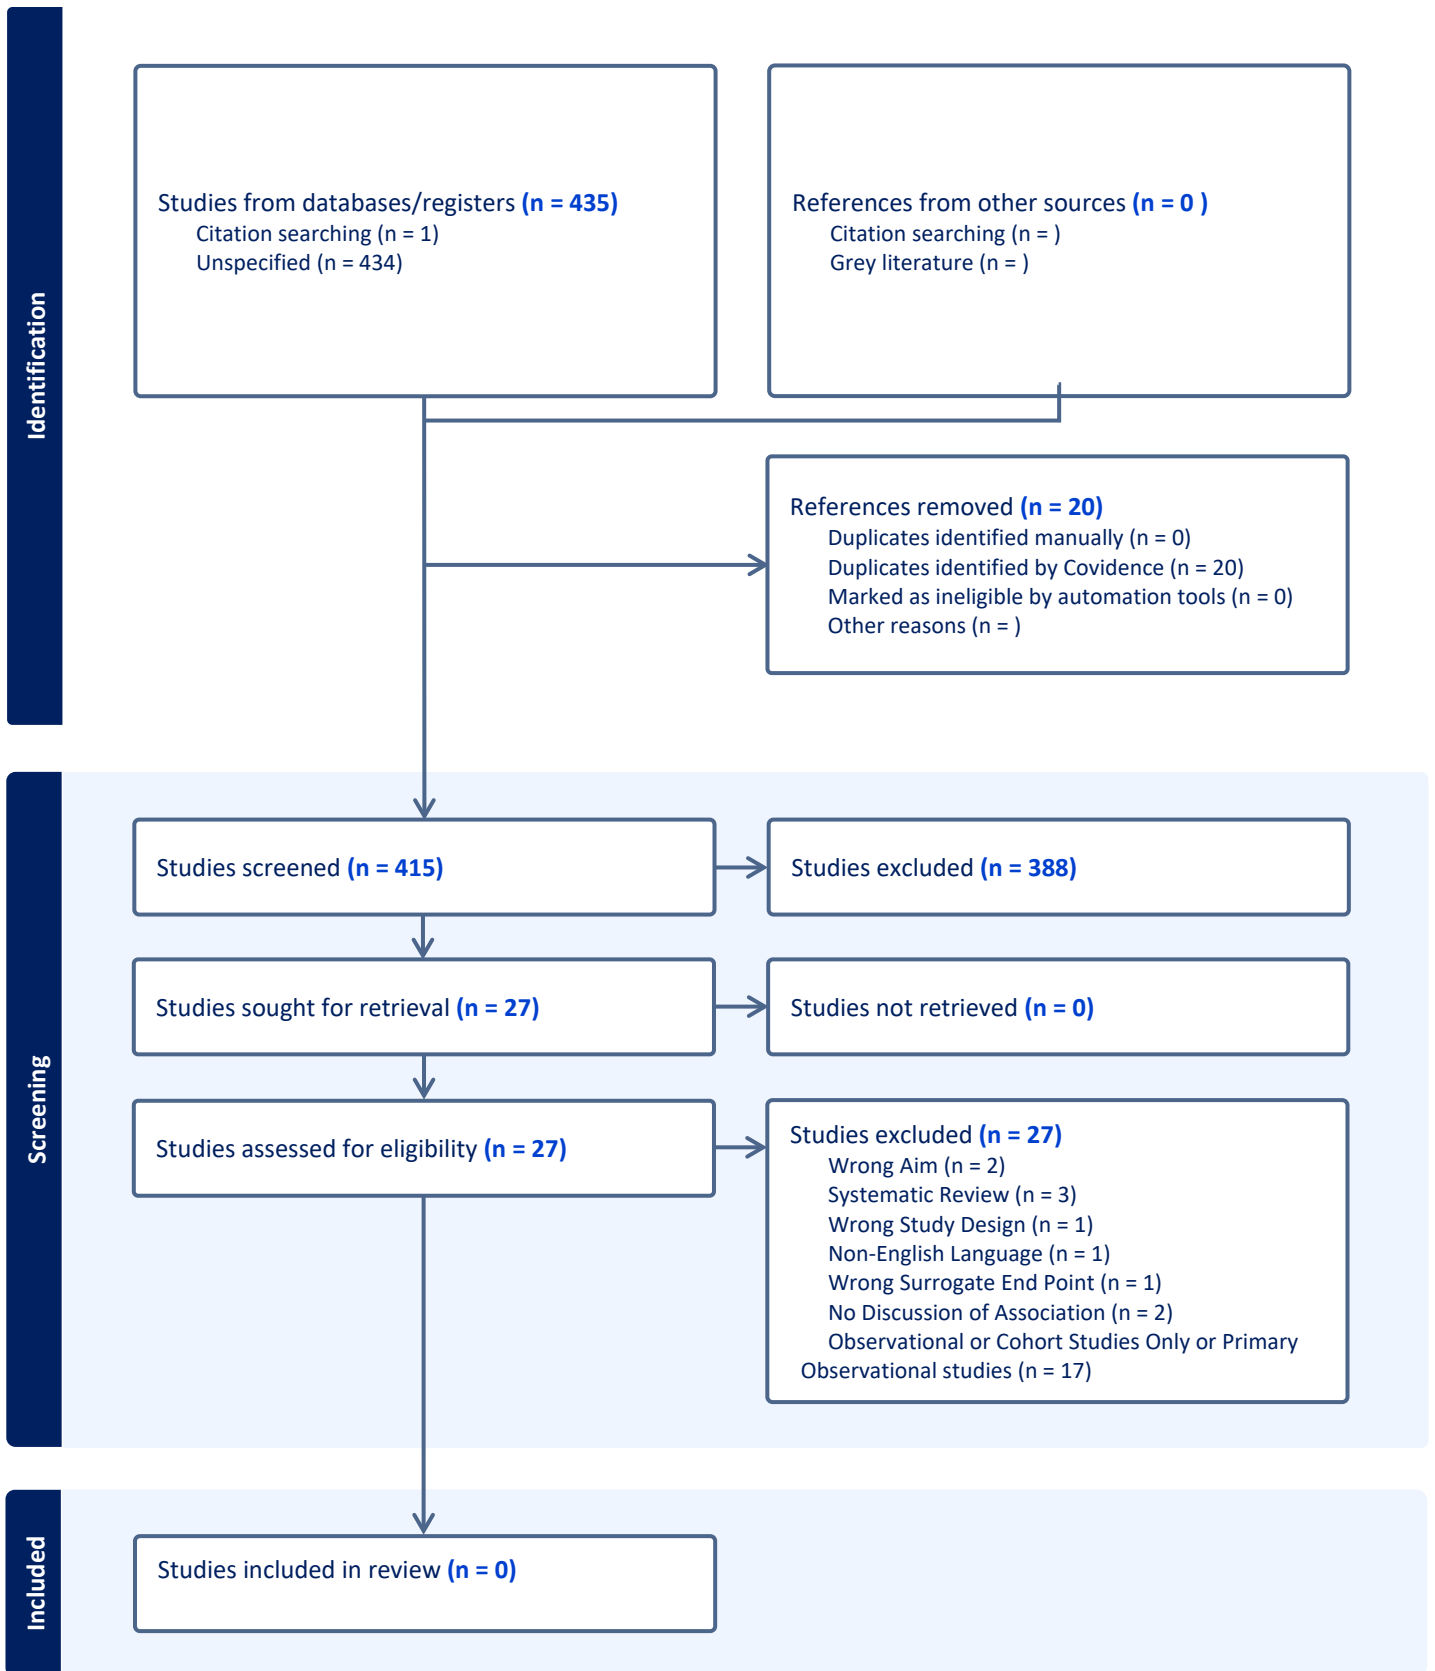

**eFigure 6. Hepatitis D**

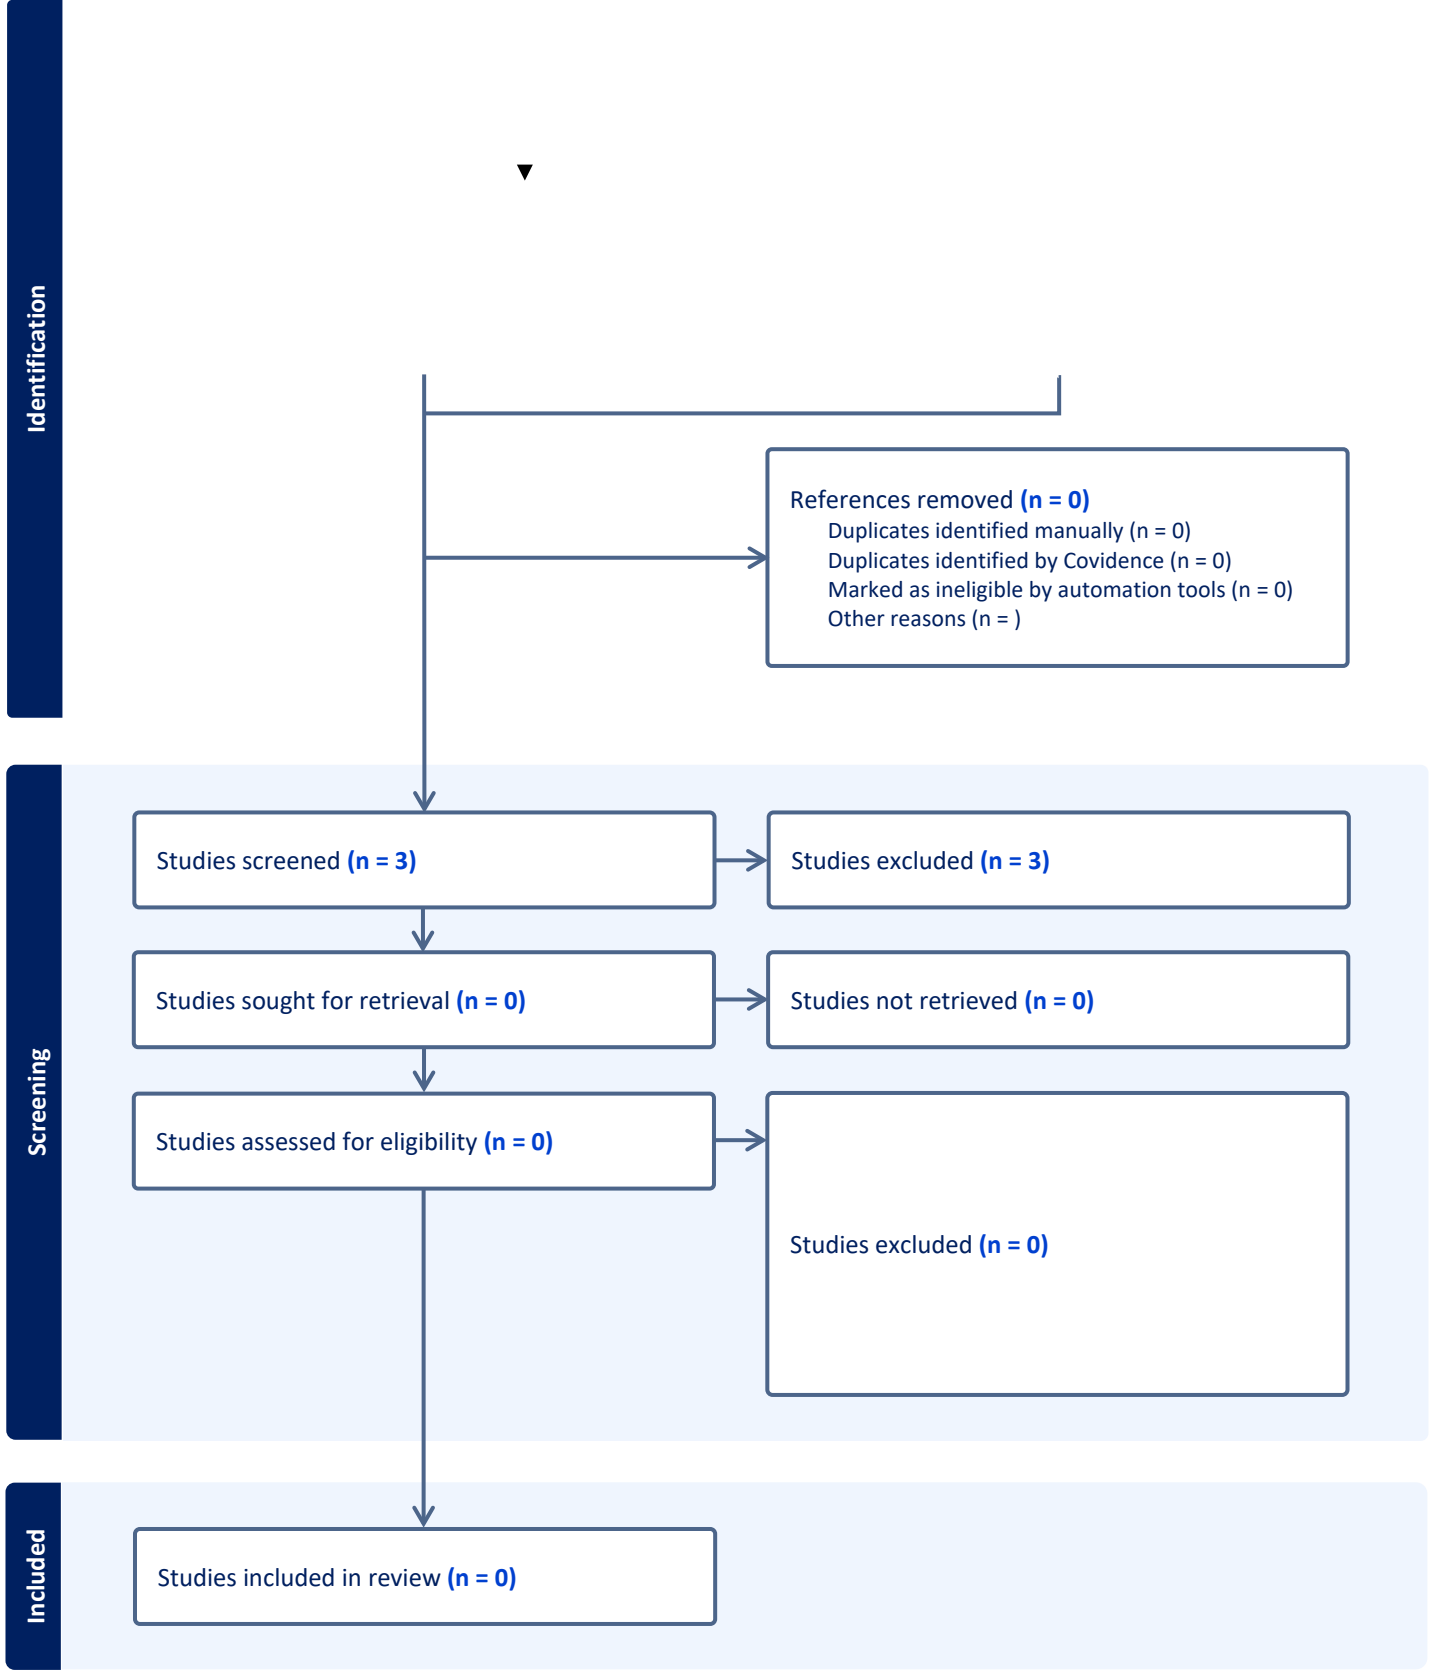

**eFigure 7. Hypothyroidism**

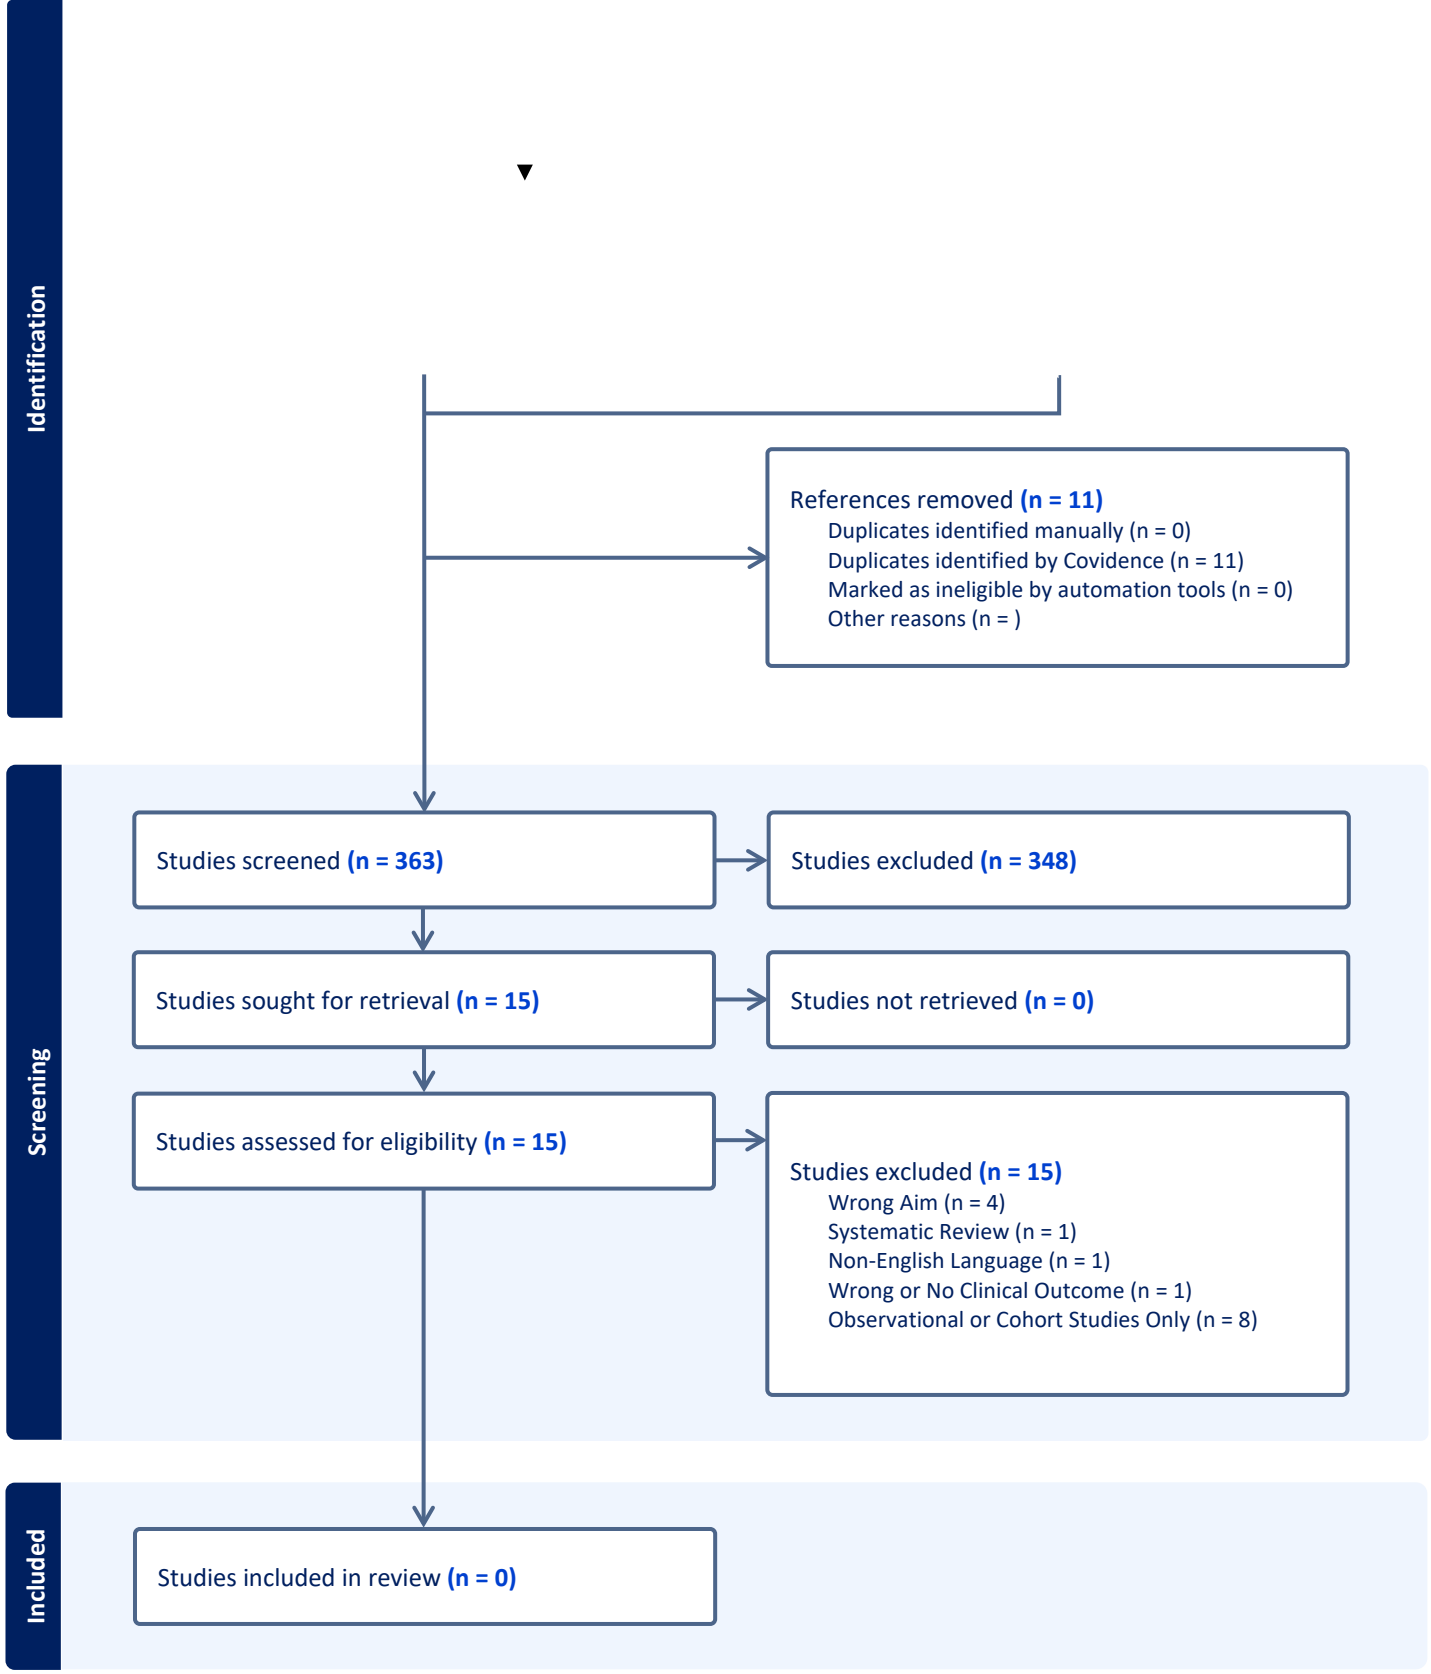

**eFigure 8. Lupus nephritis**

Studies from databases/registers (**n = 225**)

References from other sources (**n = 0**)

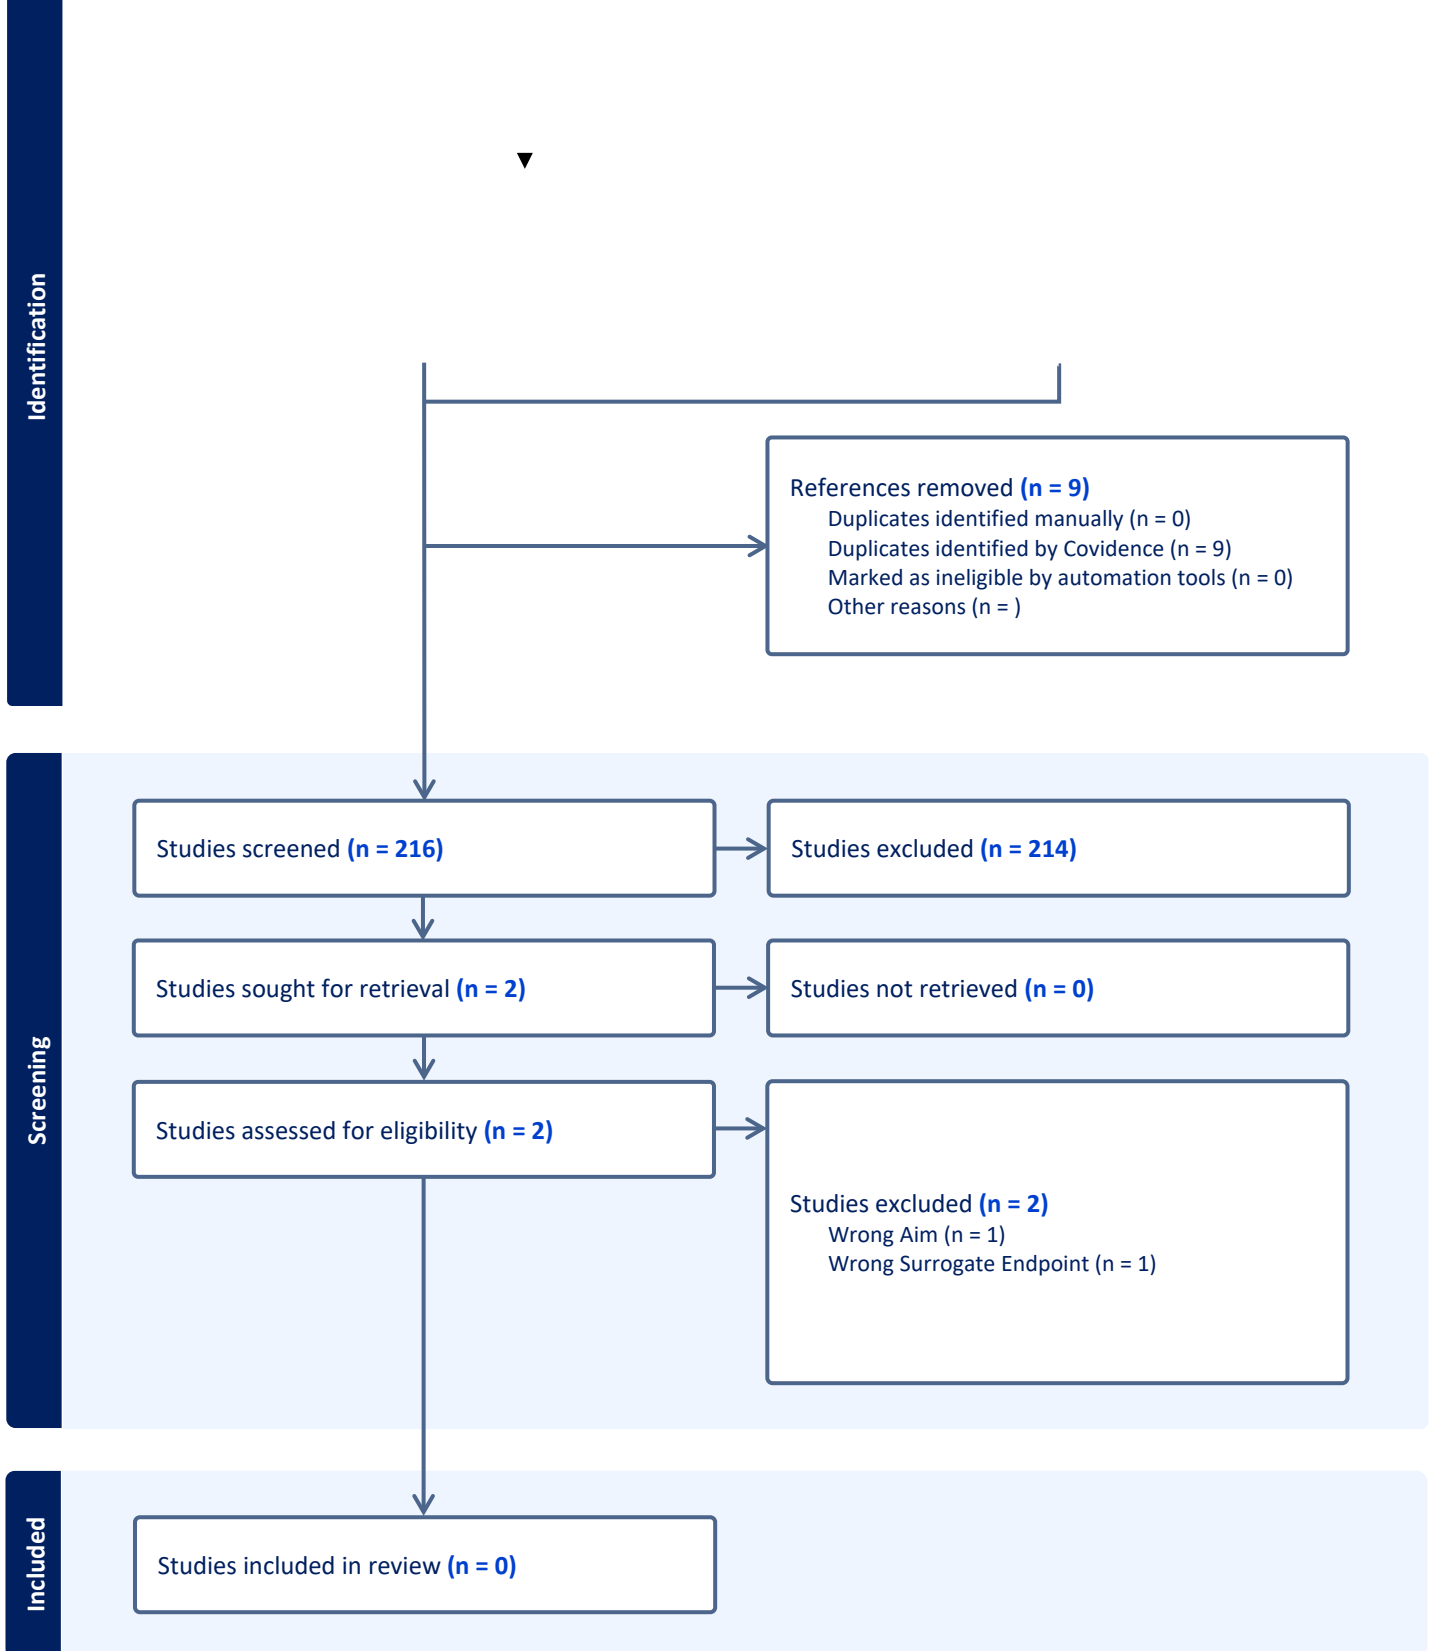

**eFigure 9. Mycobacterium avium complex (MAC) lung disease**

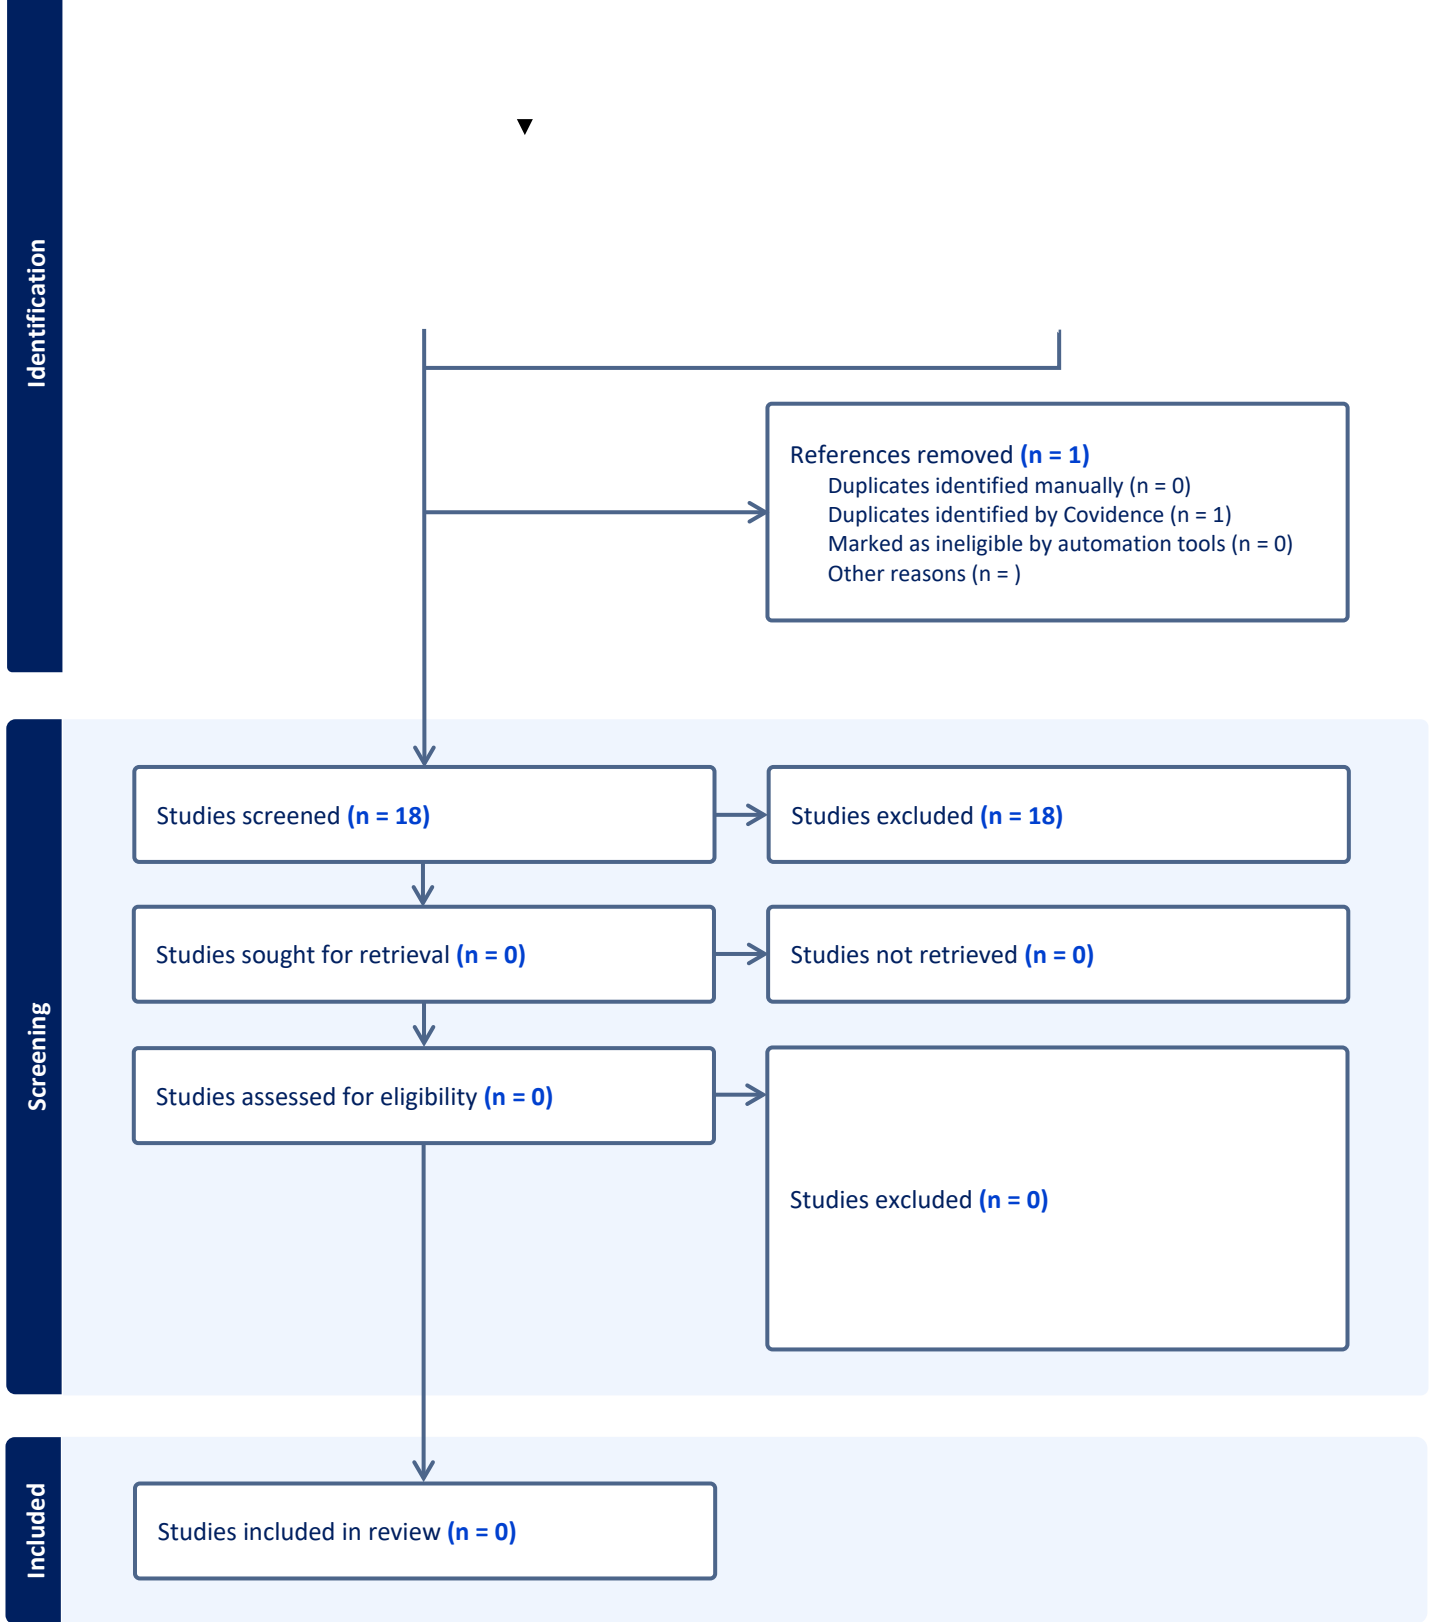

**Supplementary Figure 10. Non-alcoholic steatohepatitis (NASH)**

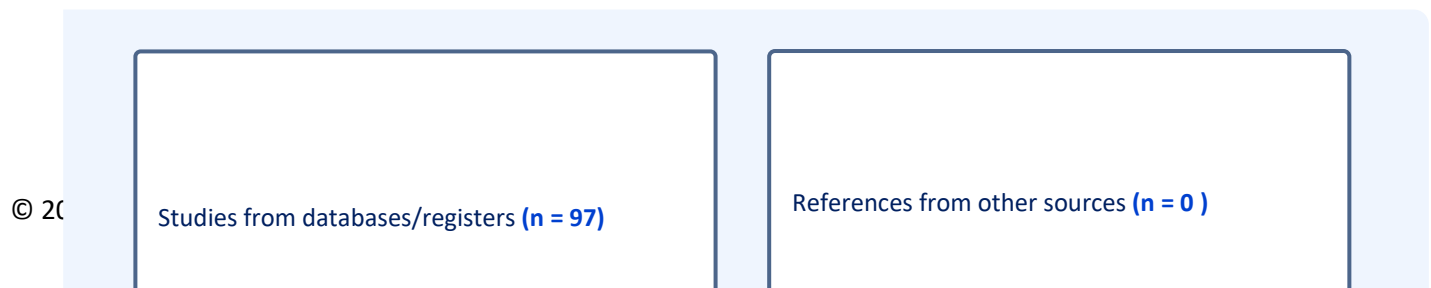



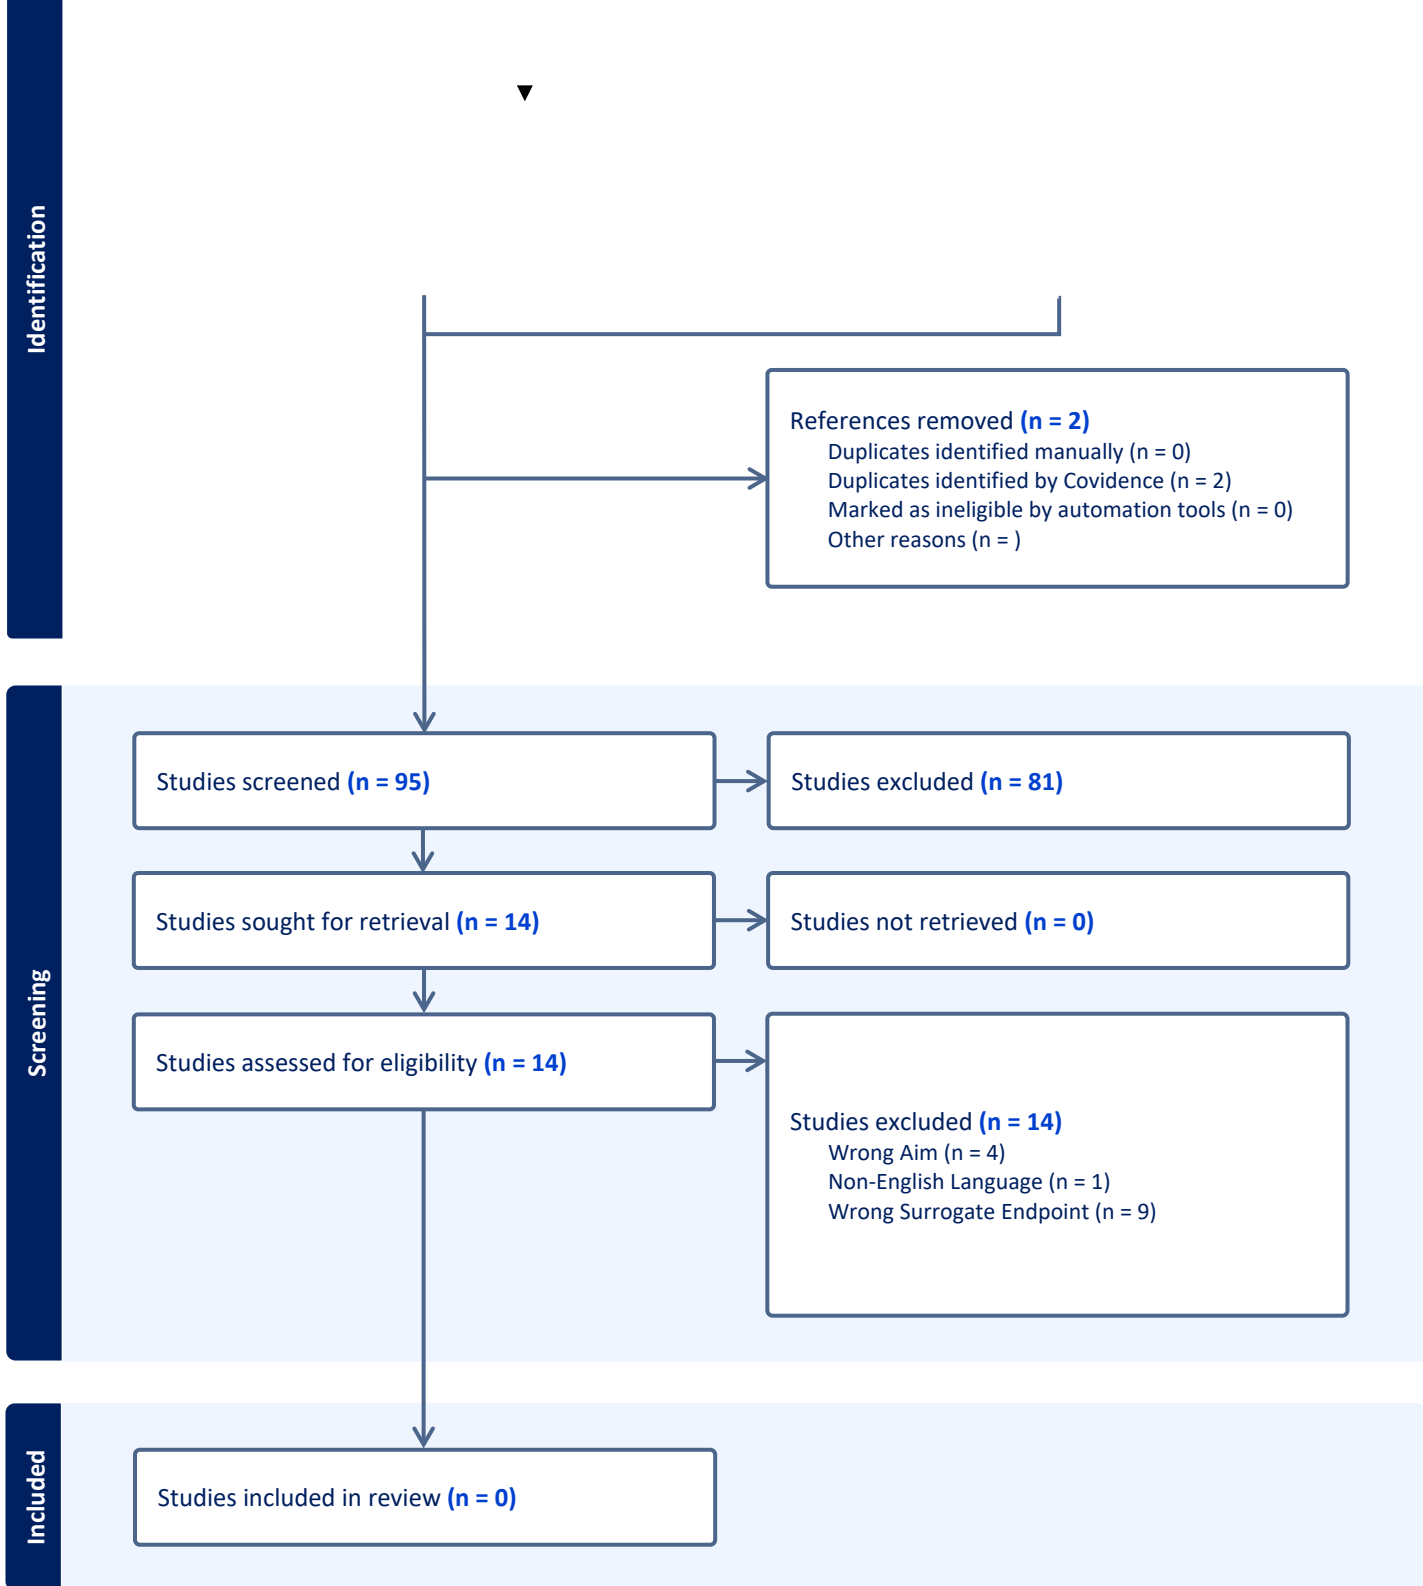

**eFigure 11. Opioid use disorder**

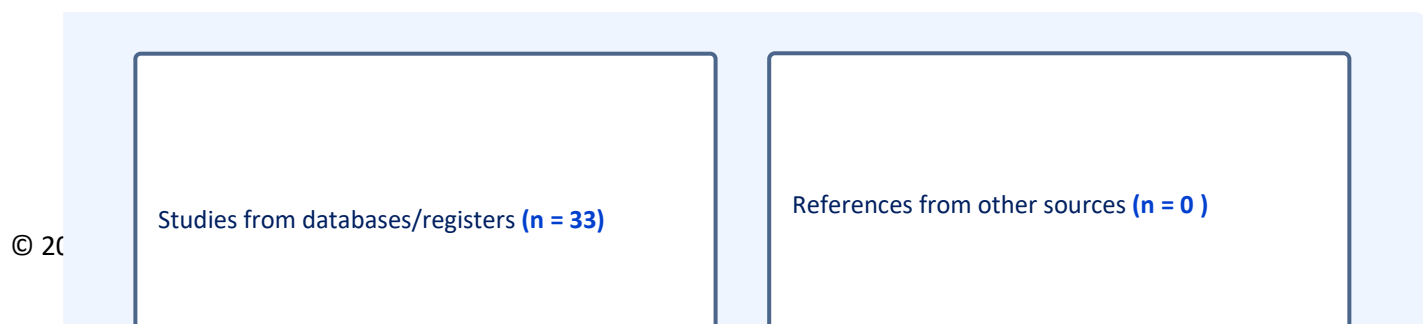

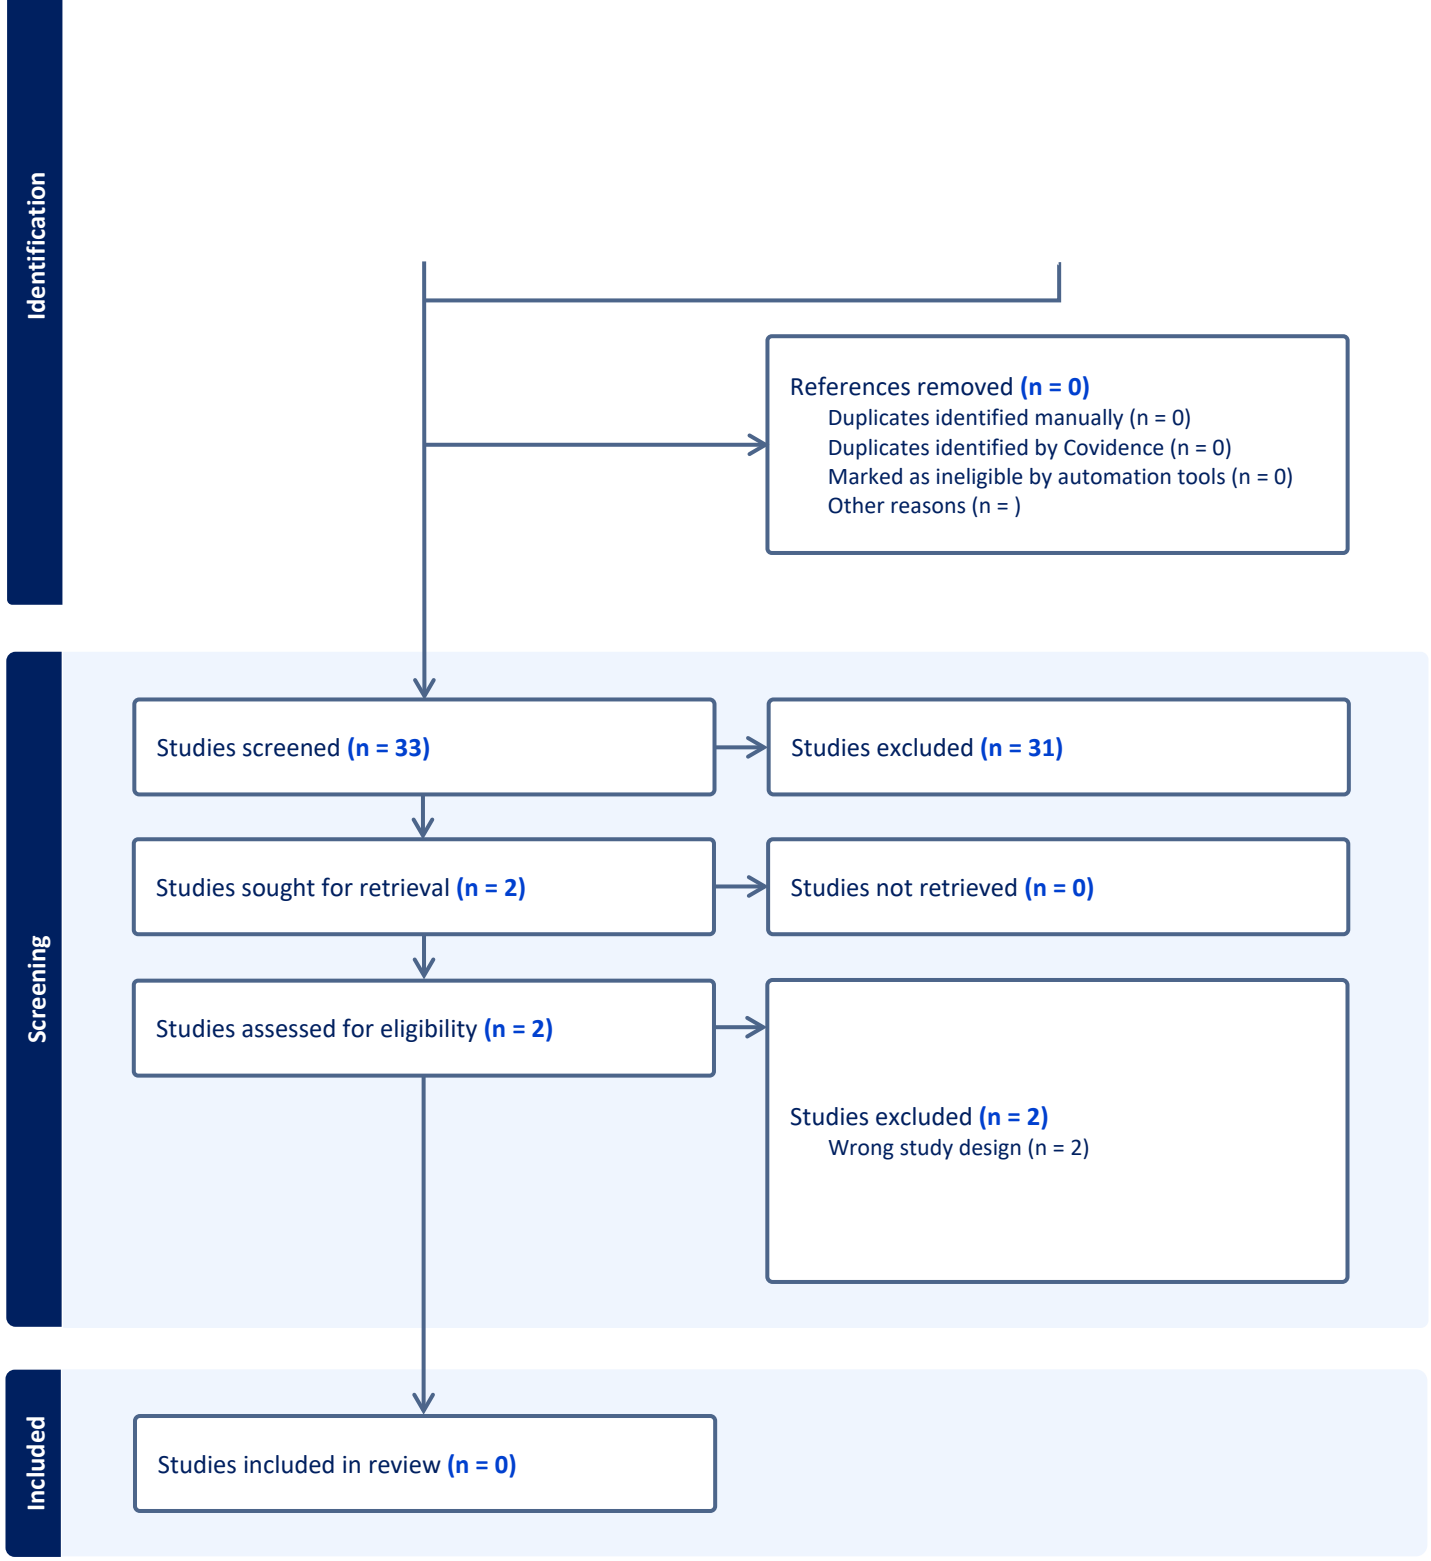

**eFigure 12. Paget's Disease**

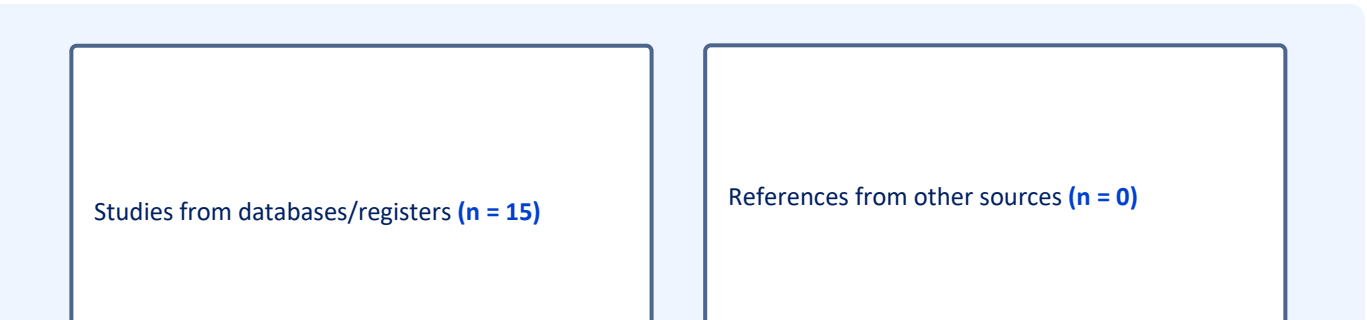

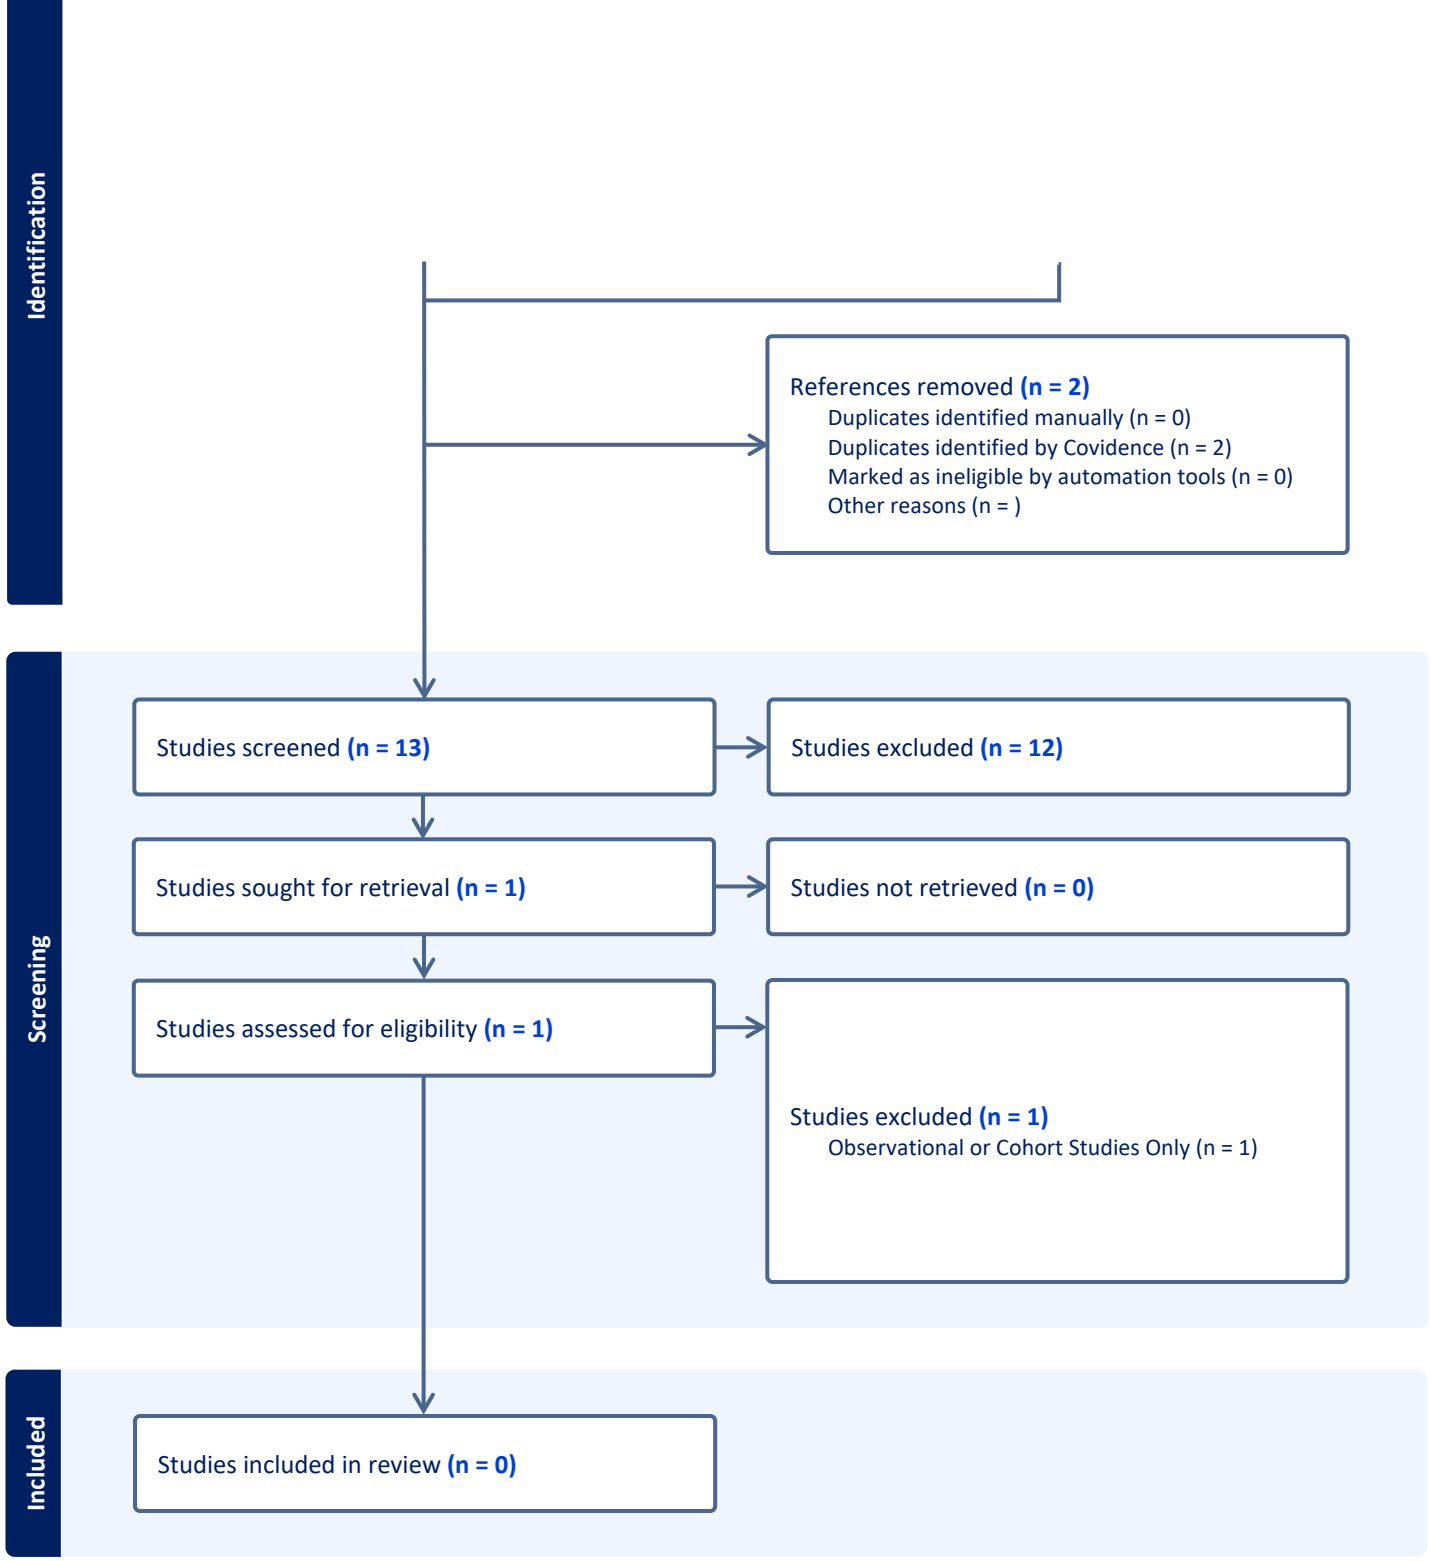

**eFigure 13. Primary biliary cholangitis**

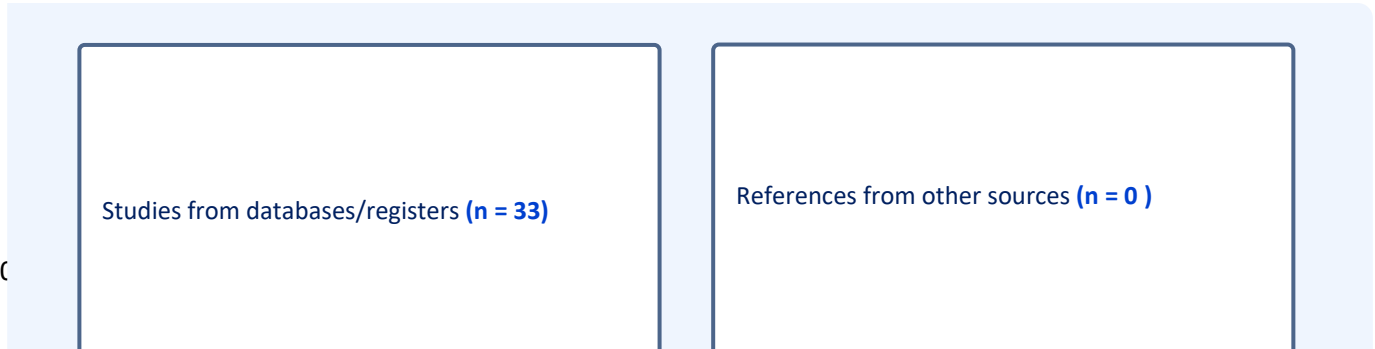

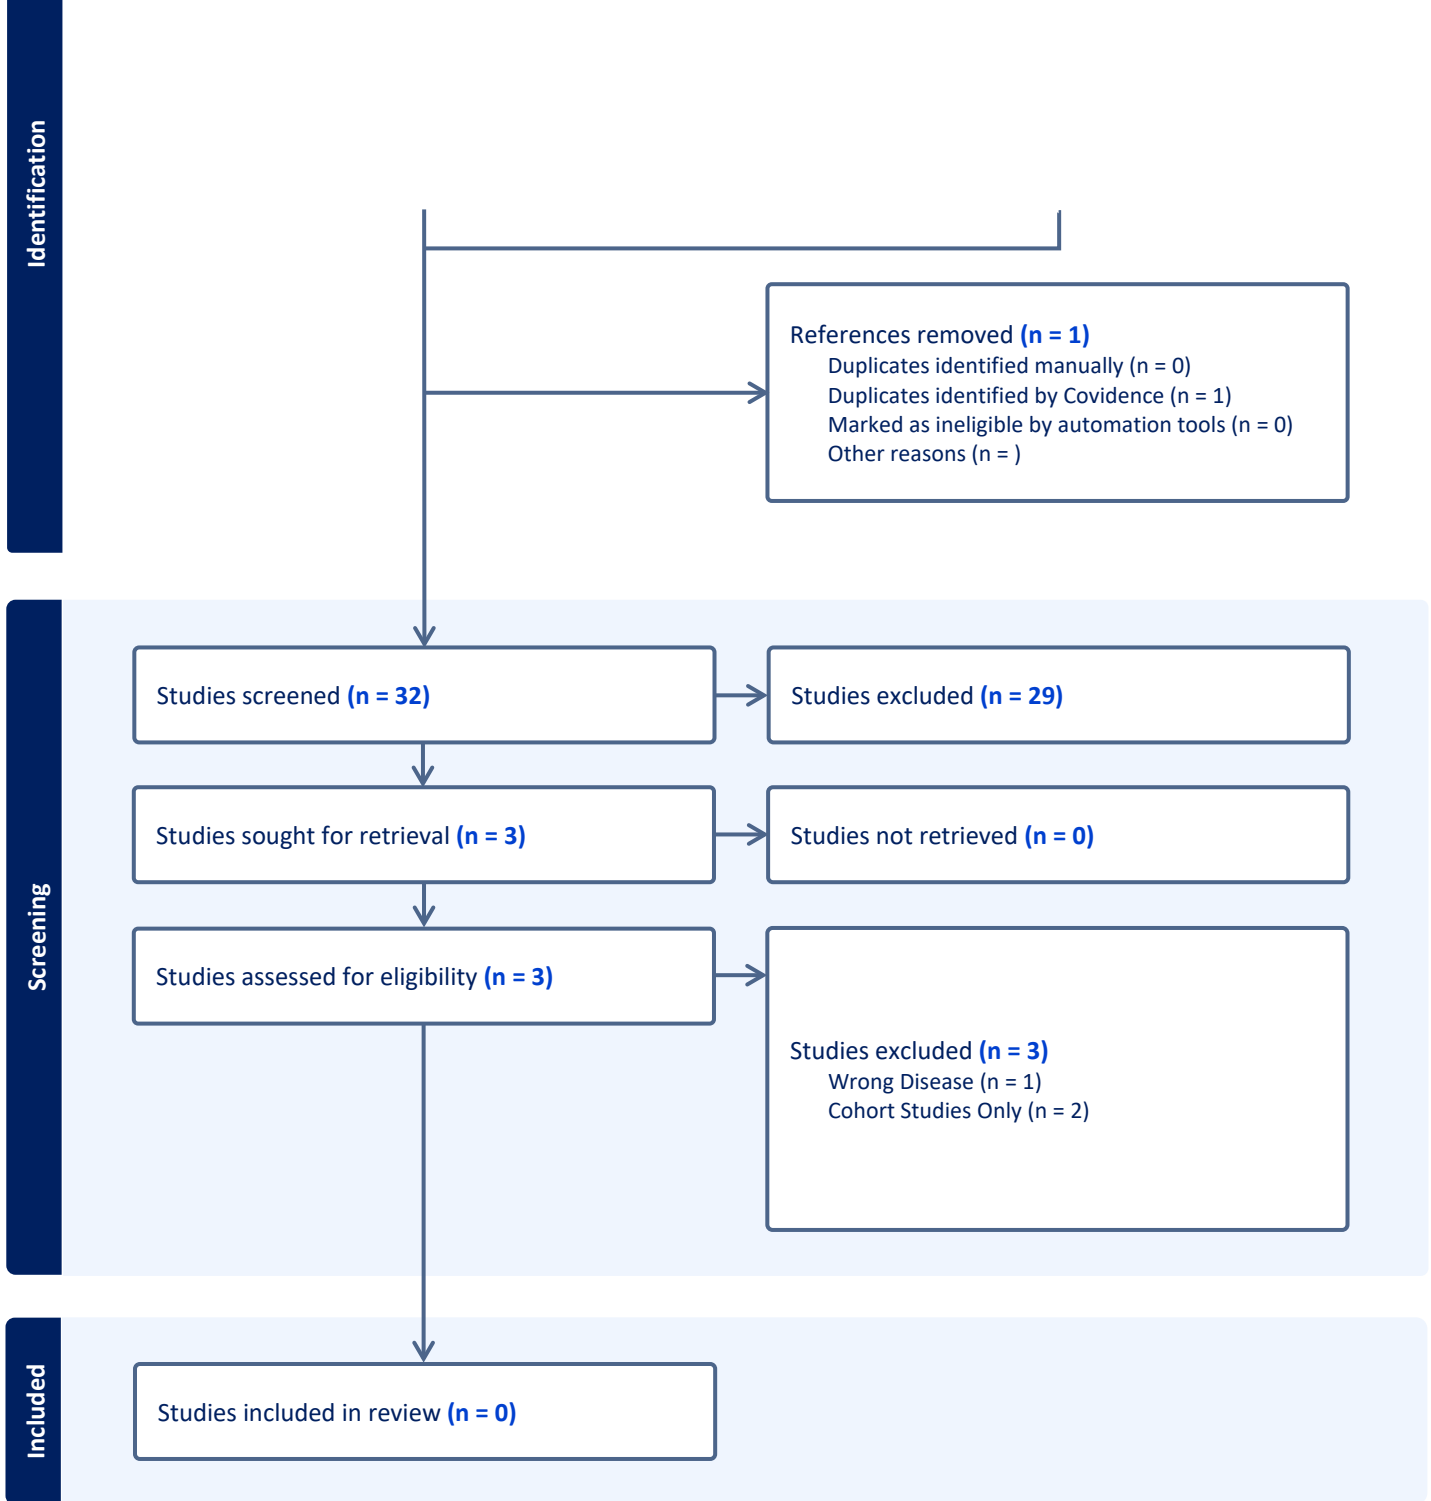

**eFigure 14. Primary hyperparathyroidism**

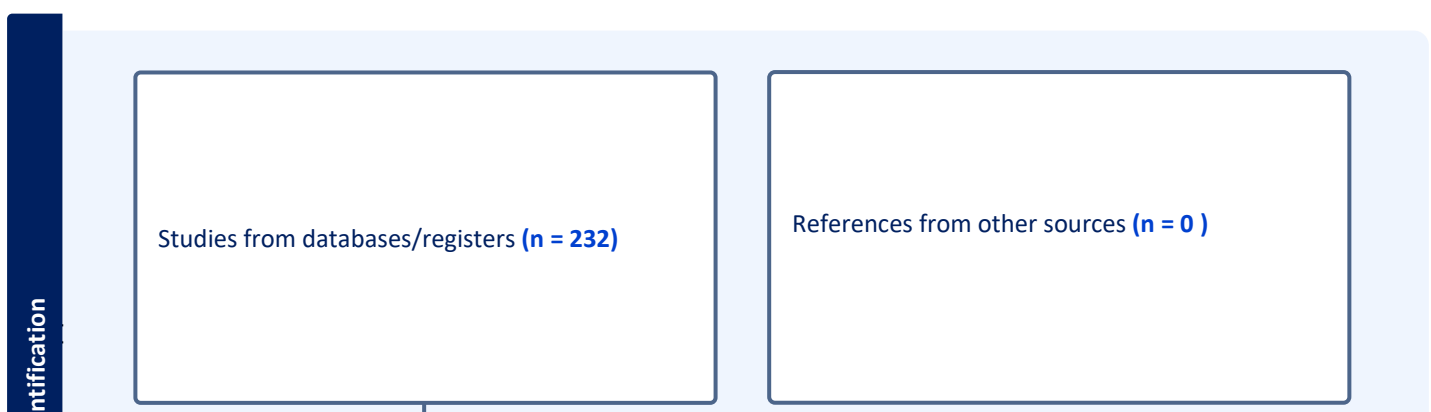

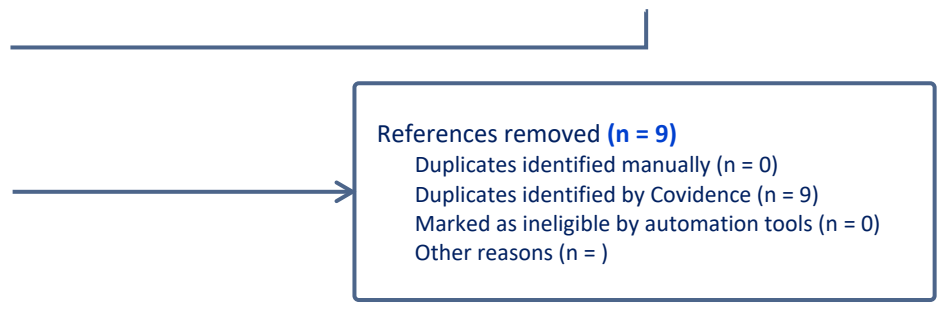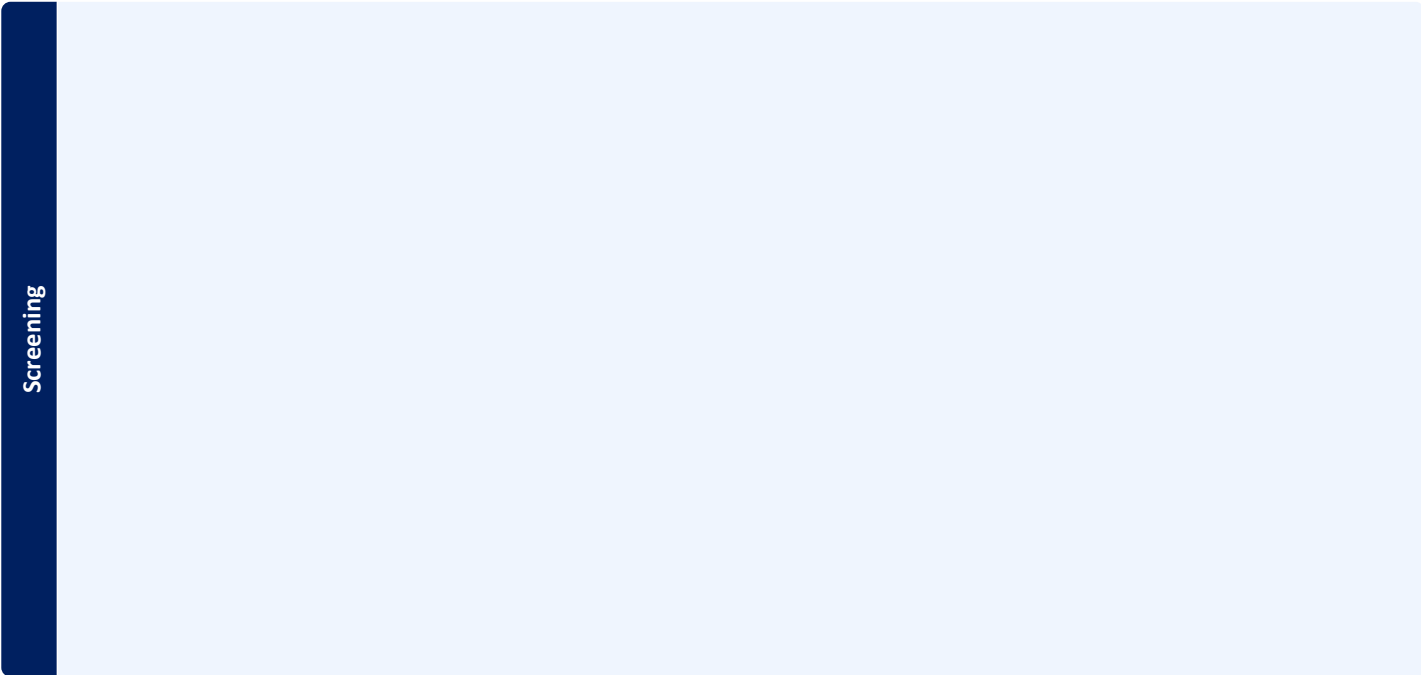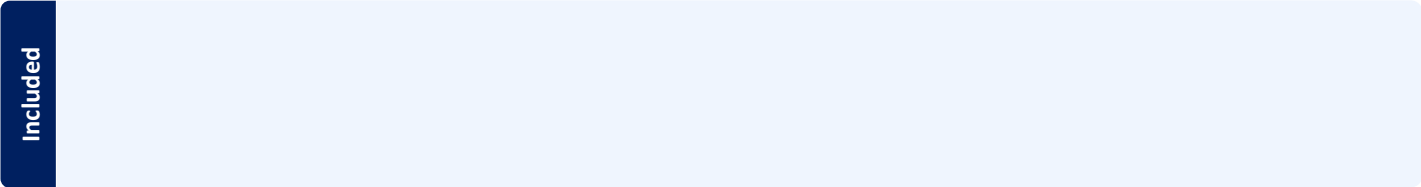

**eFigure 15. Pulmonary tuberculosis**

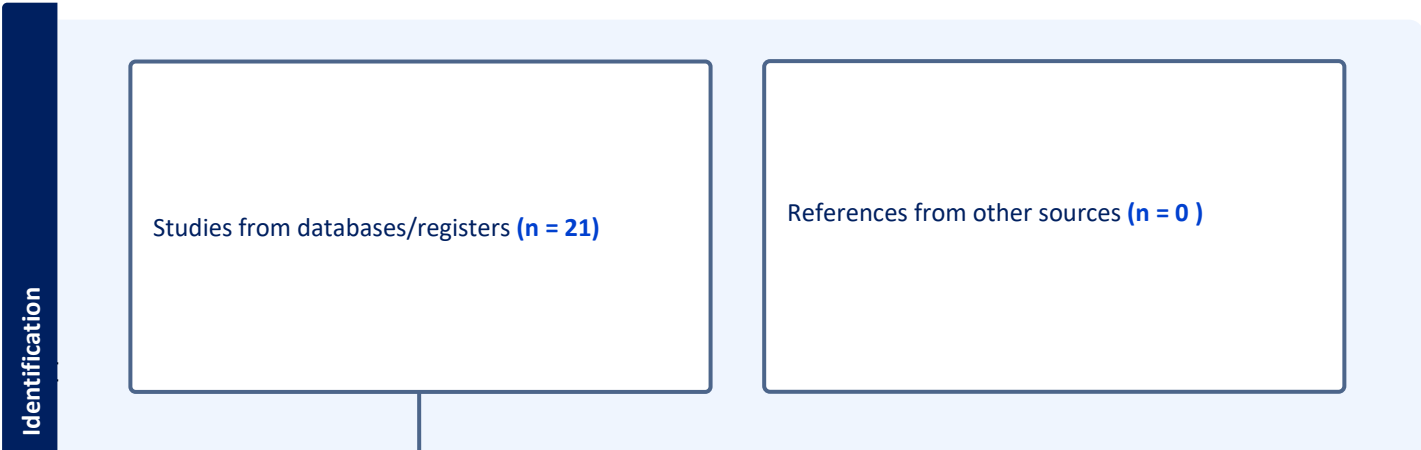

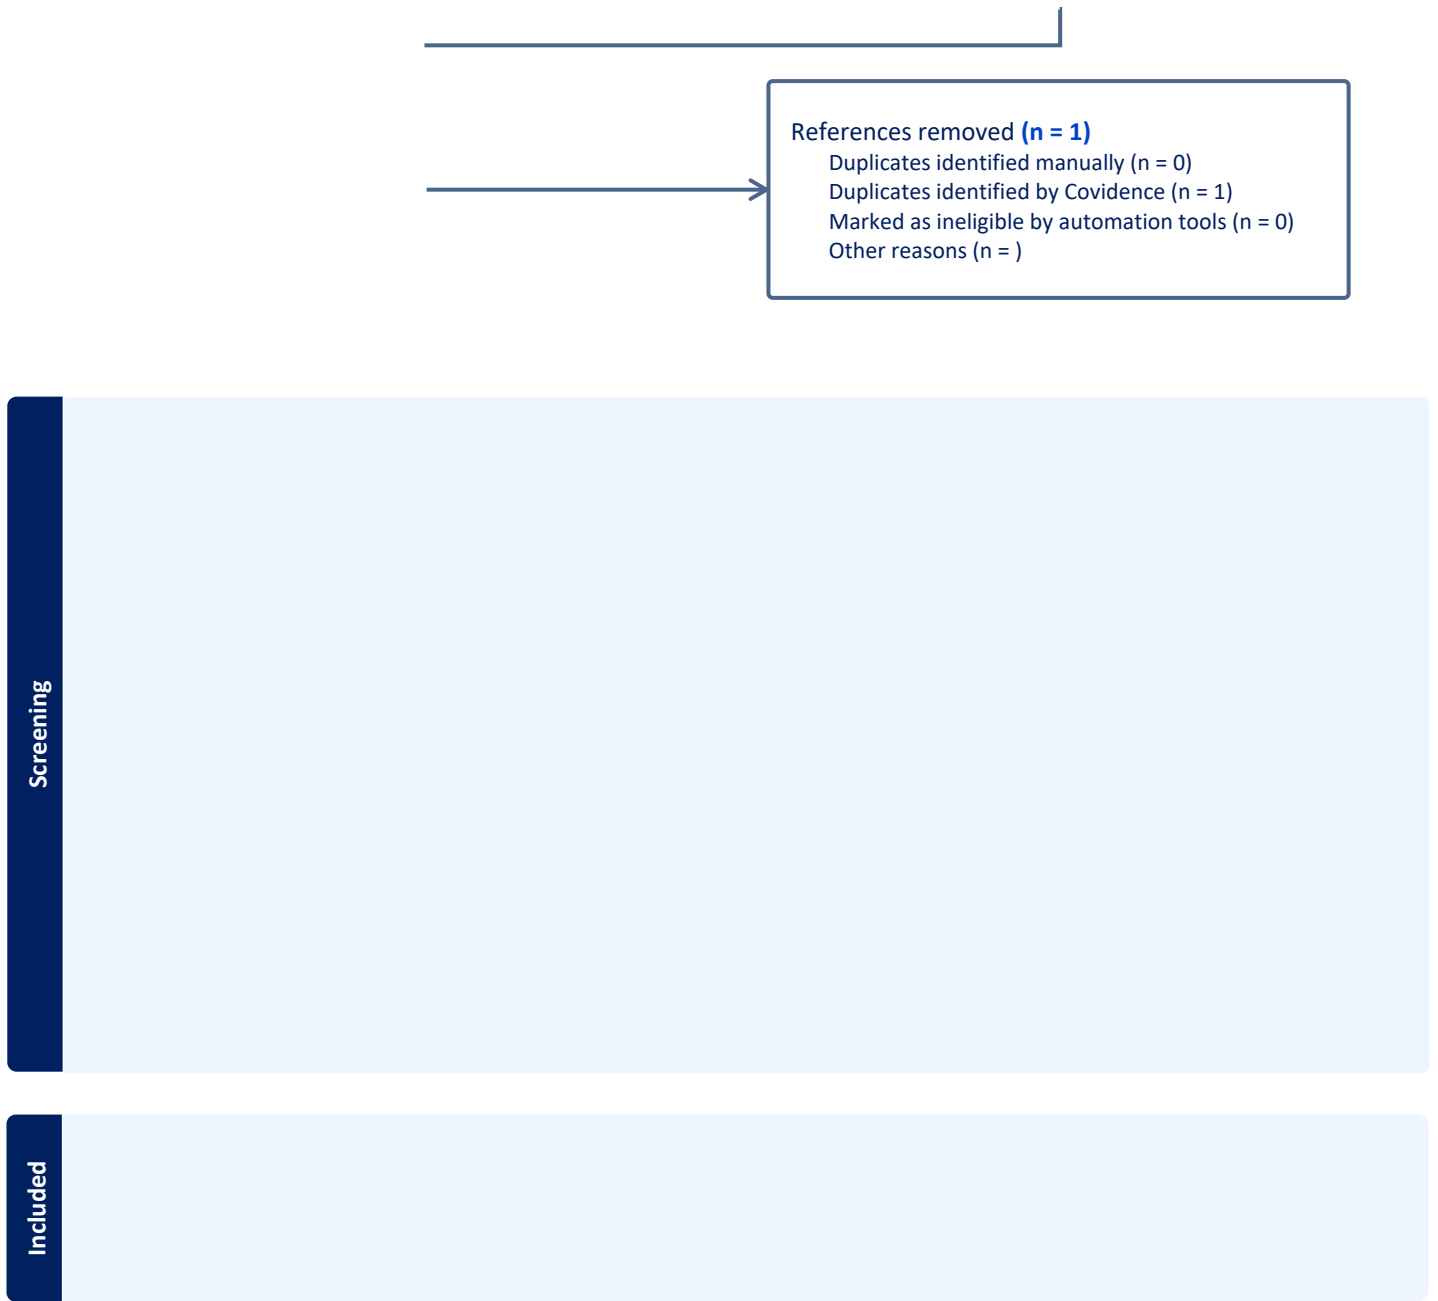

**eFigure 16. Systemic sclerosis-interstitial lung disease**

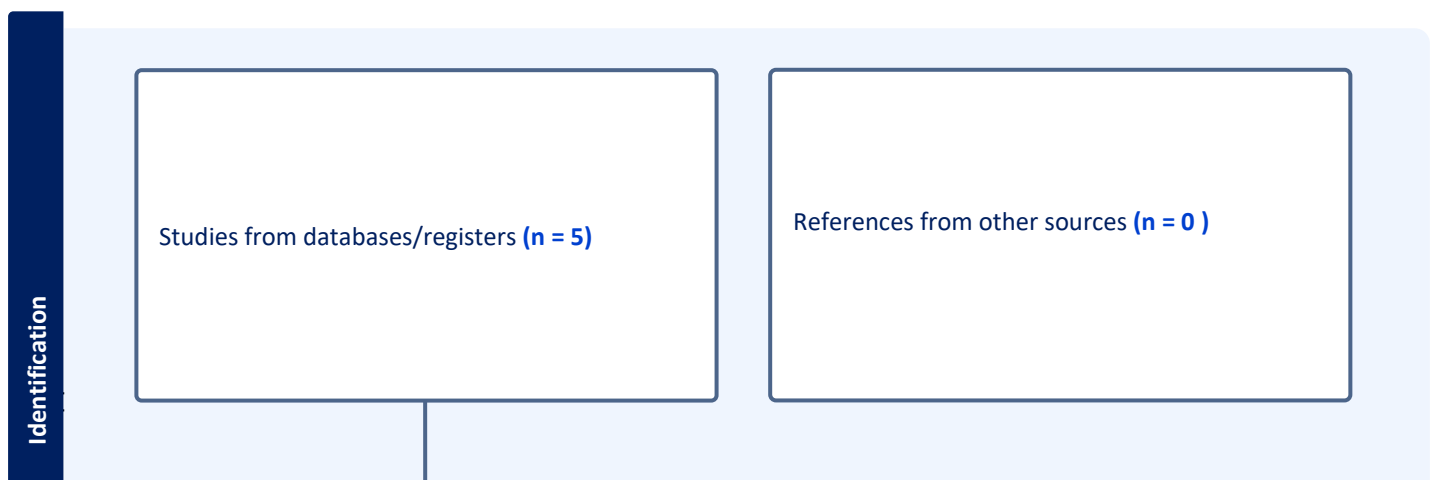



**eFigure 17. Tobacco dependence**

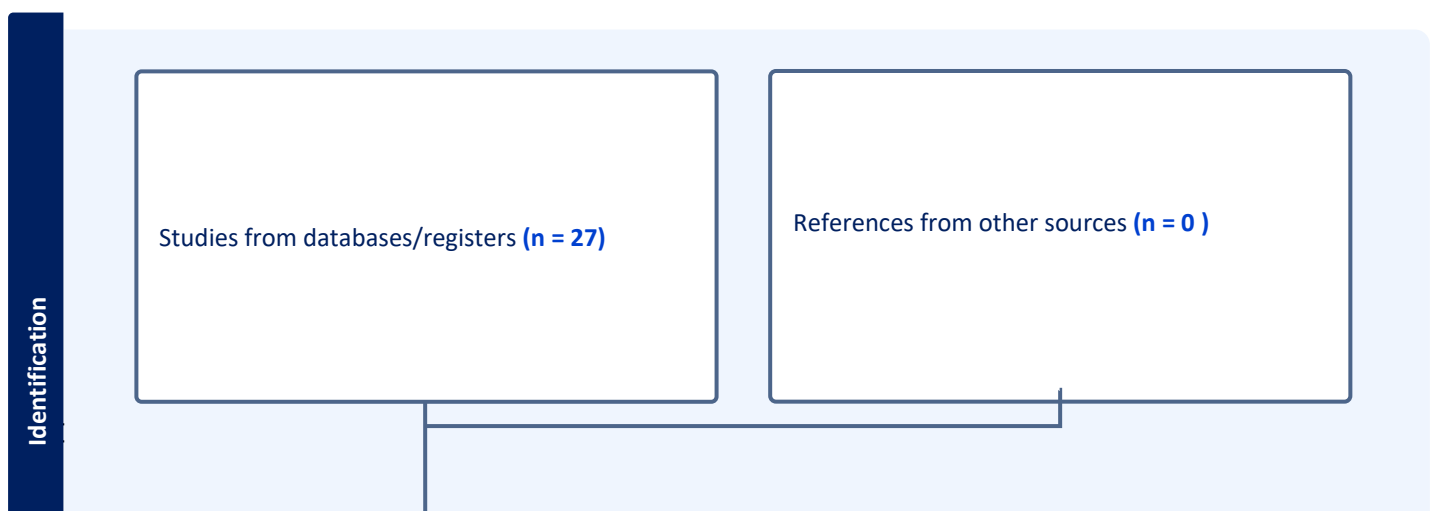

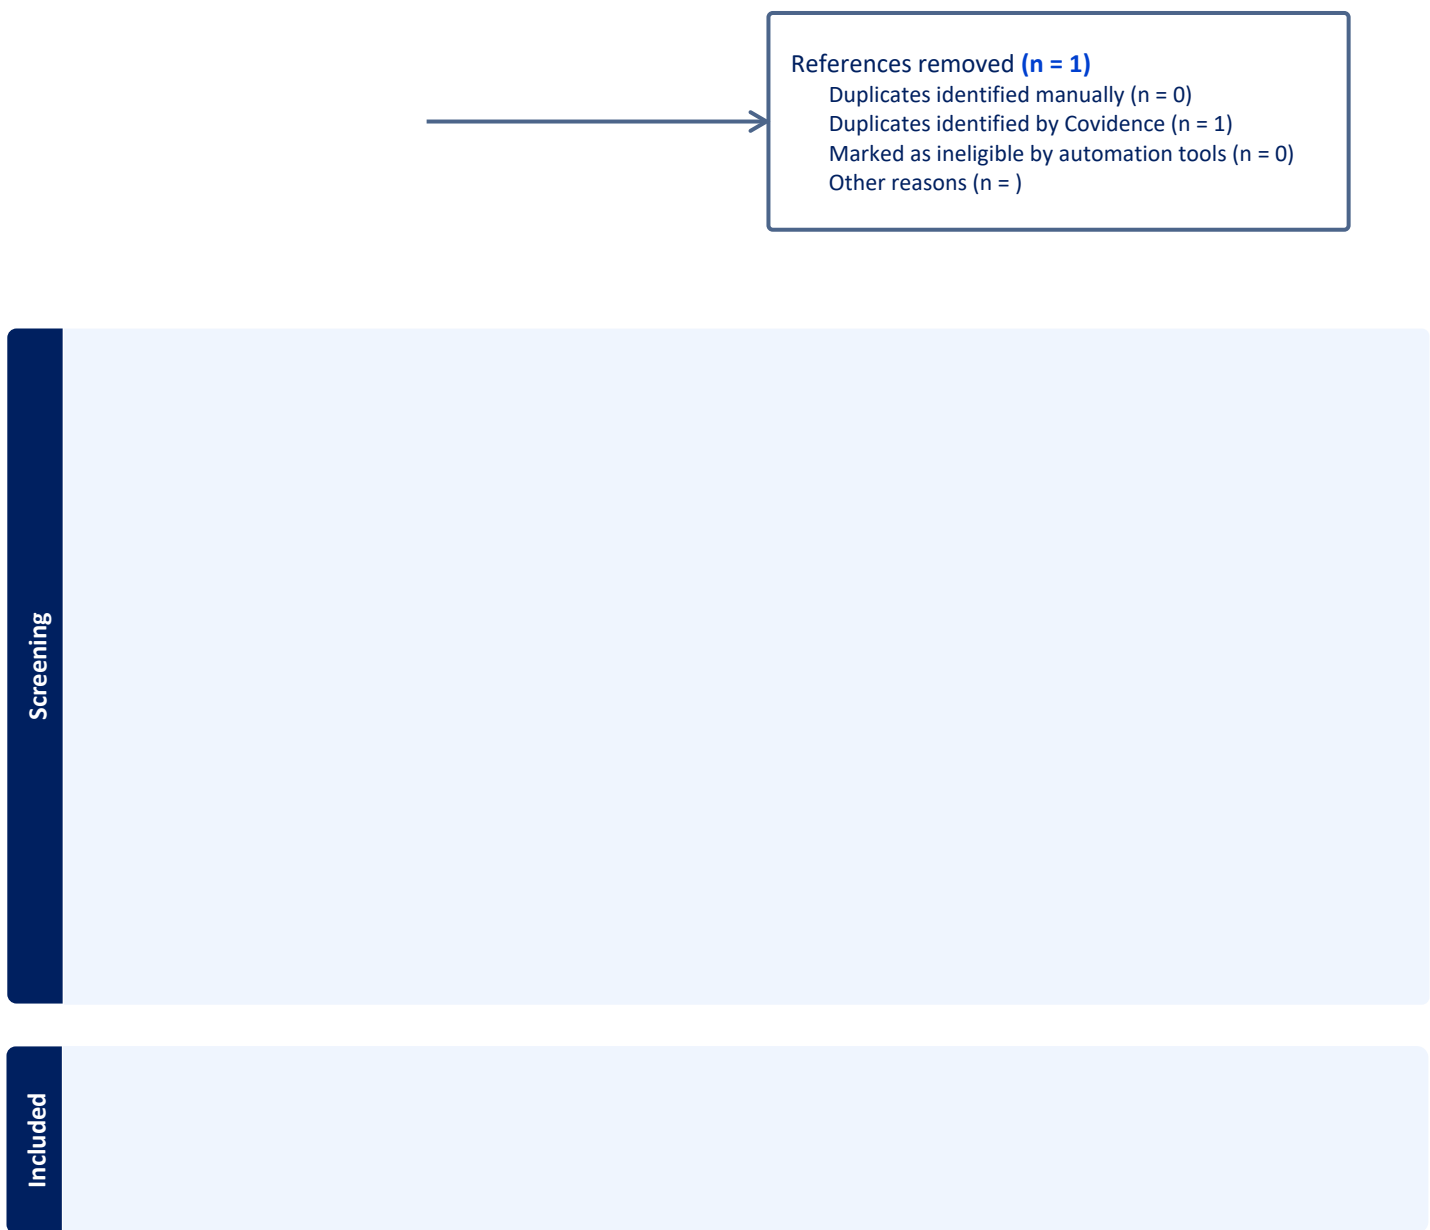

**eFigure 18. Alzheimer’s Disease**

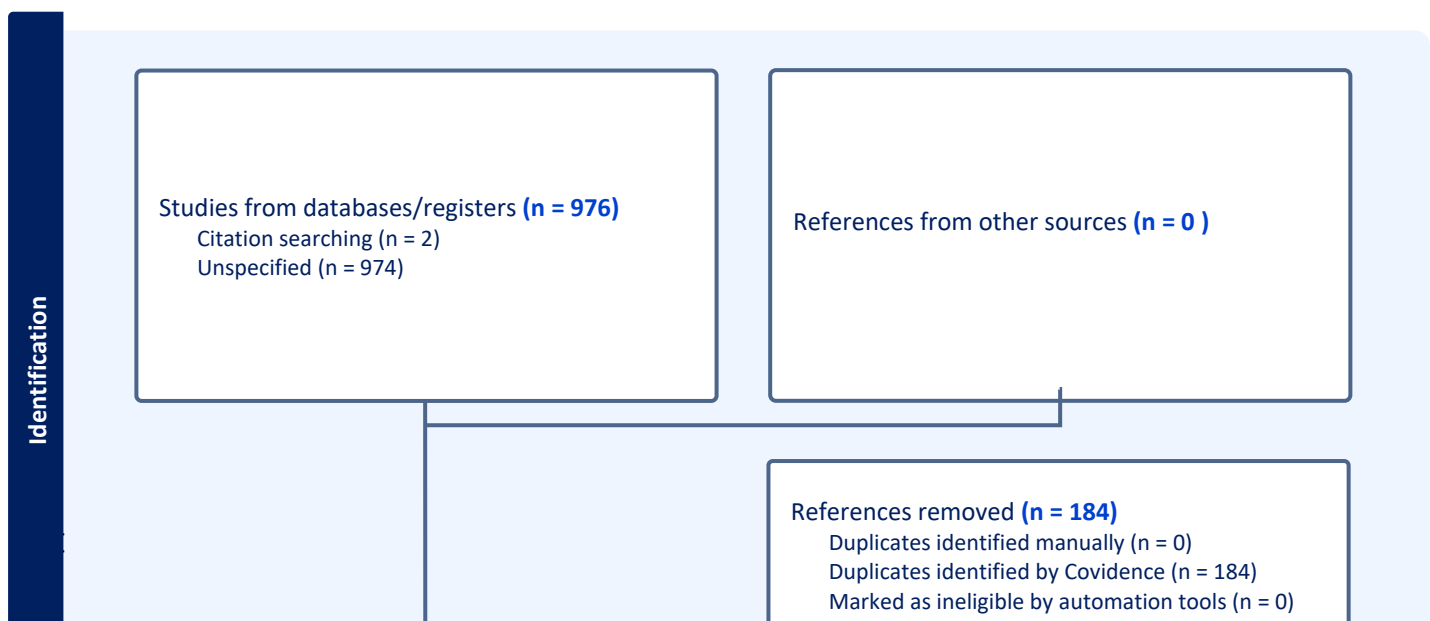



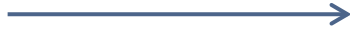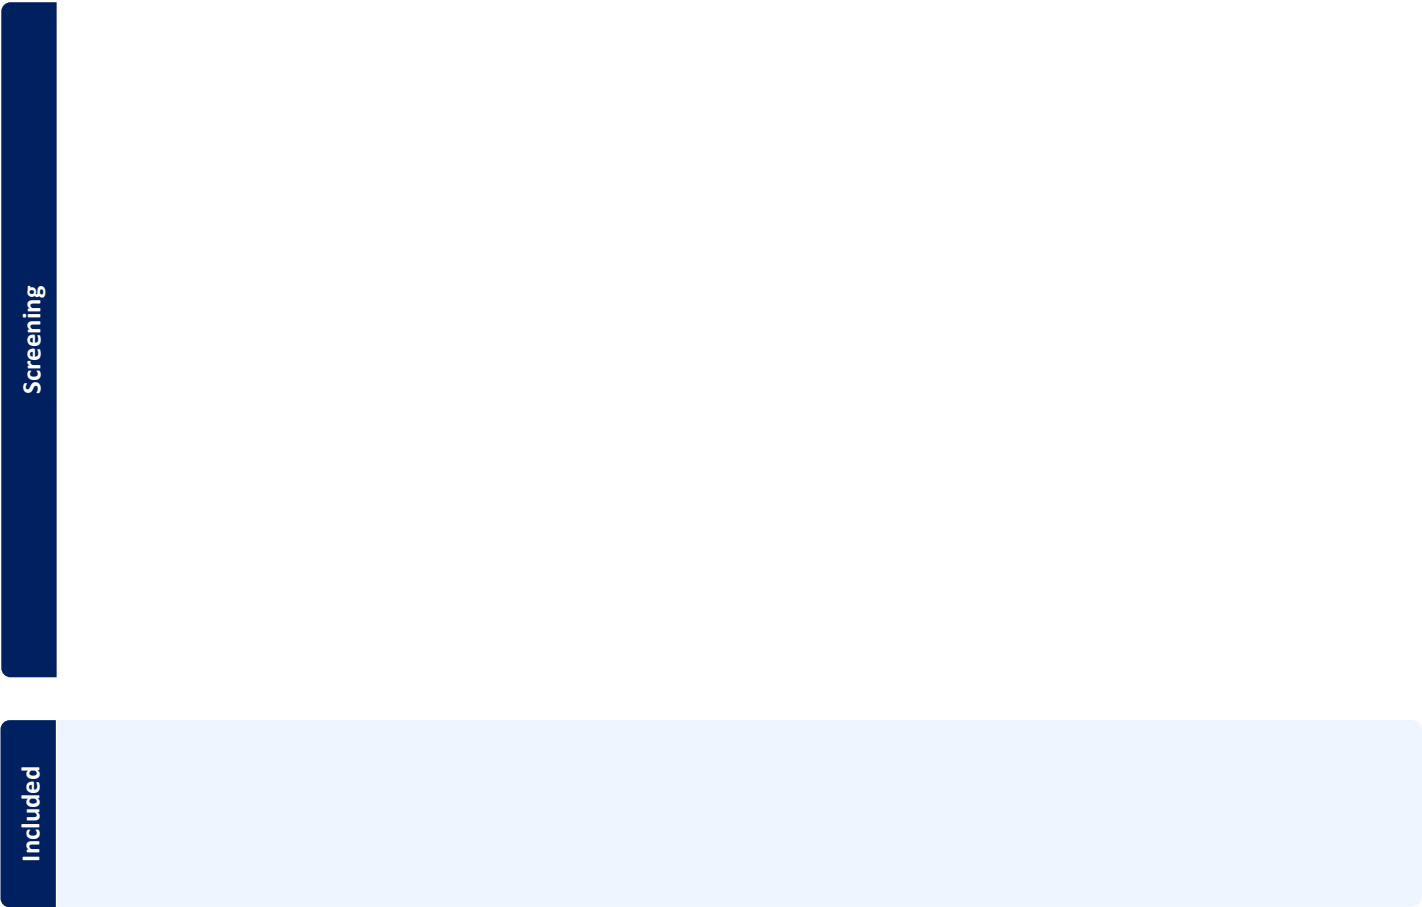

**eFigure 19. Primary glomerular diseases associated with significant proteinuria**

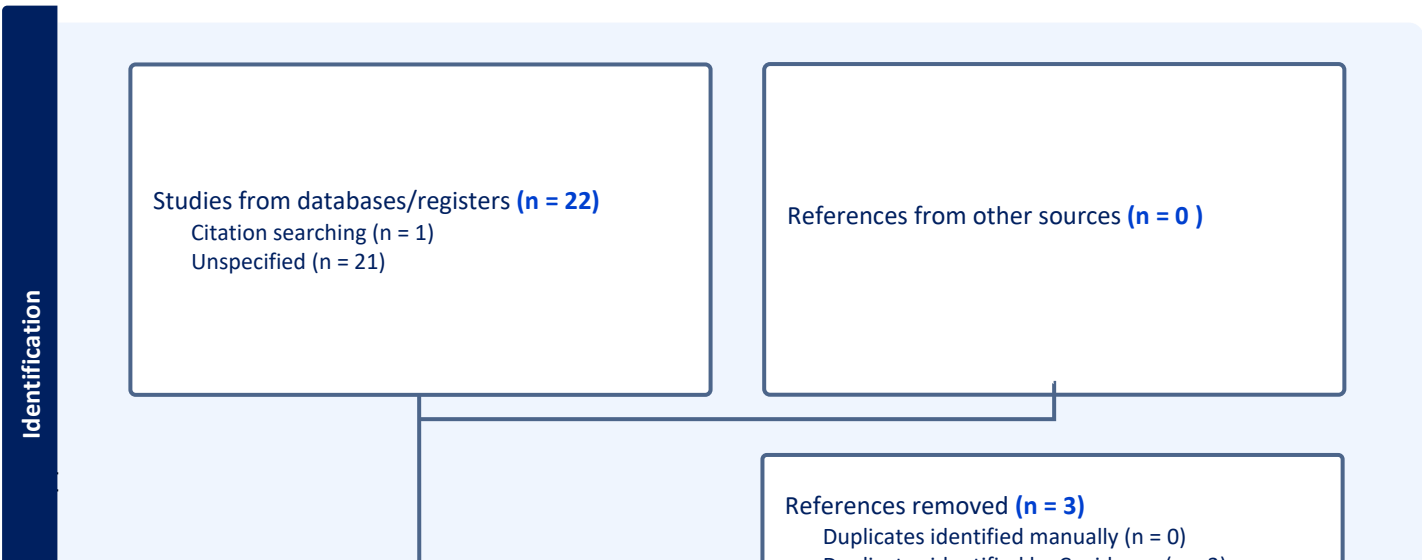

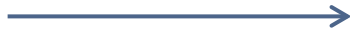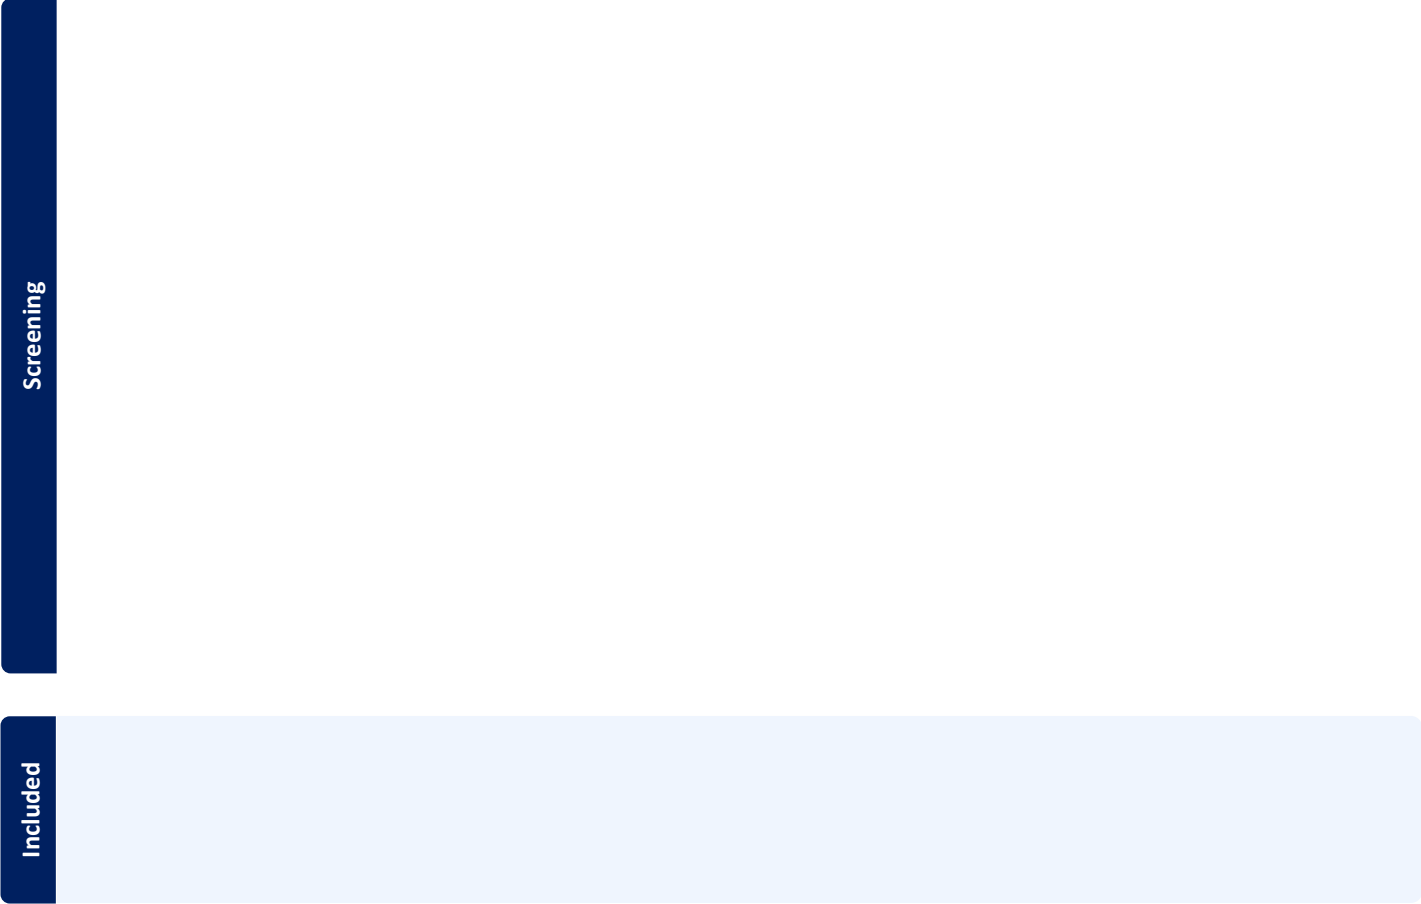

**eFigure 20. Chronic Kidney Disease**

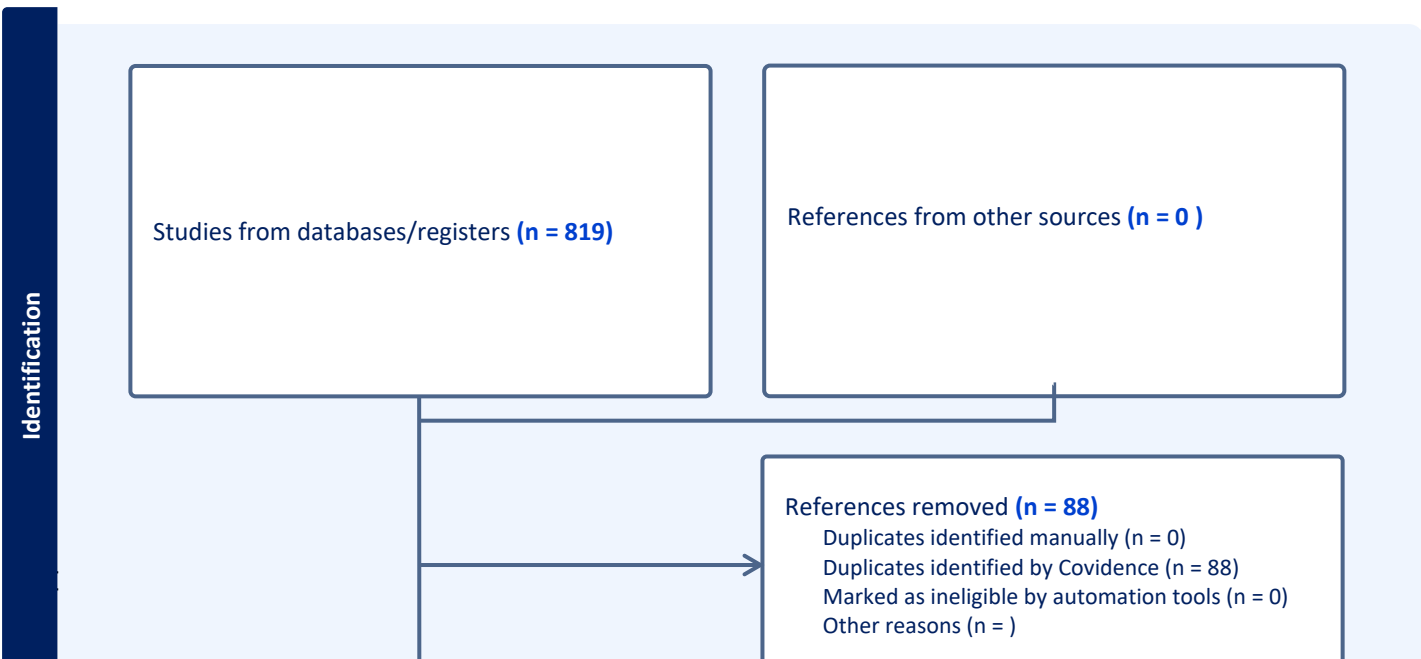

Screening

Included

**eFigure 21. Chronic Obstructive Pulmonary Disease**

Identification

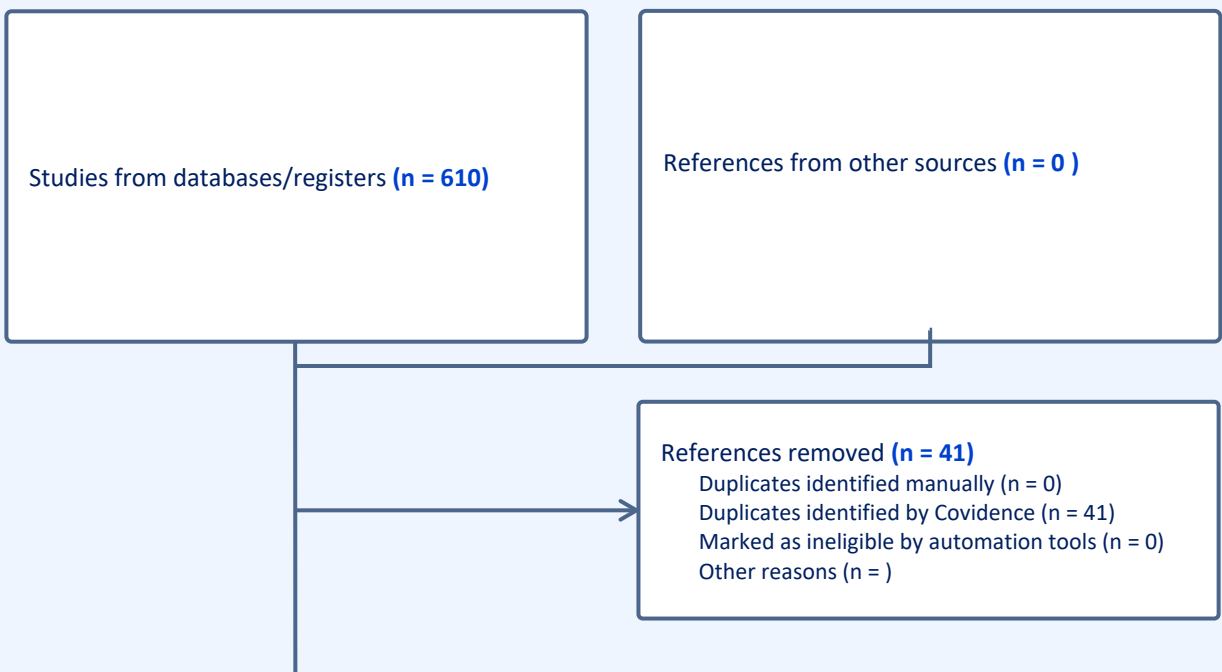

Screening

Included

eFigure 22. Gout

Identification

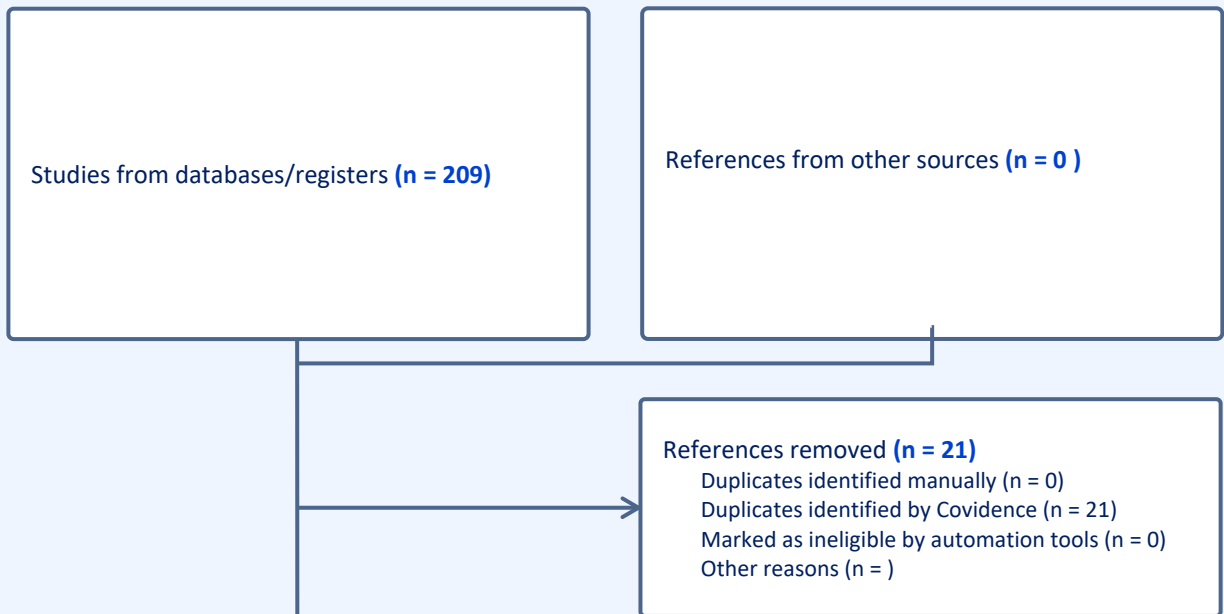



**eFigure 24. Hypercholesterolemia**

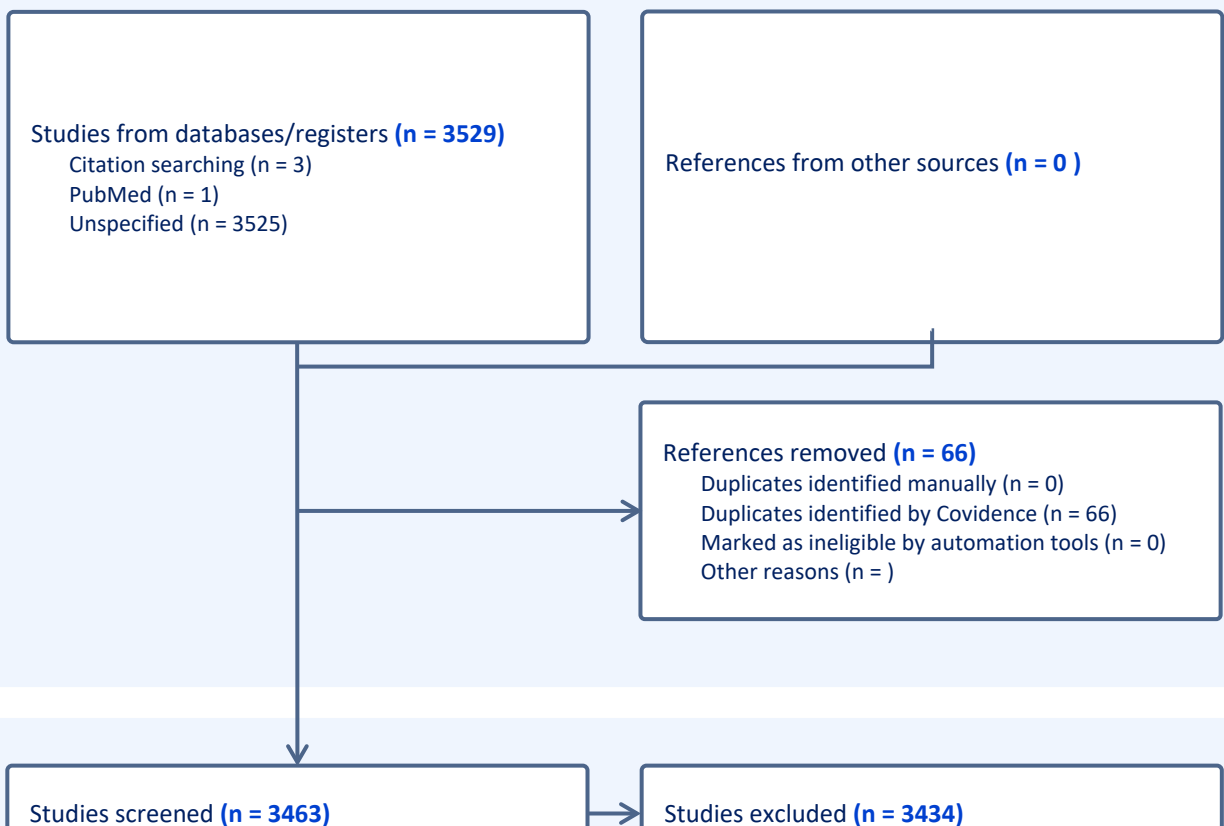

Screening

Included

eFigure 25. Hyperphosphatemia

Identification

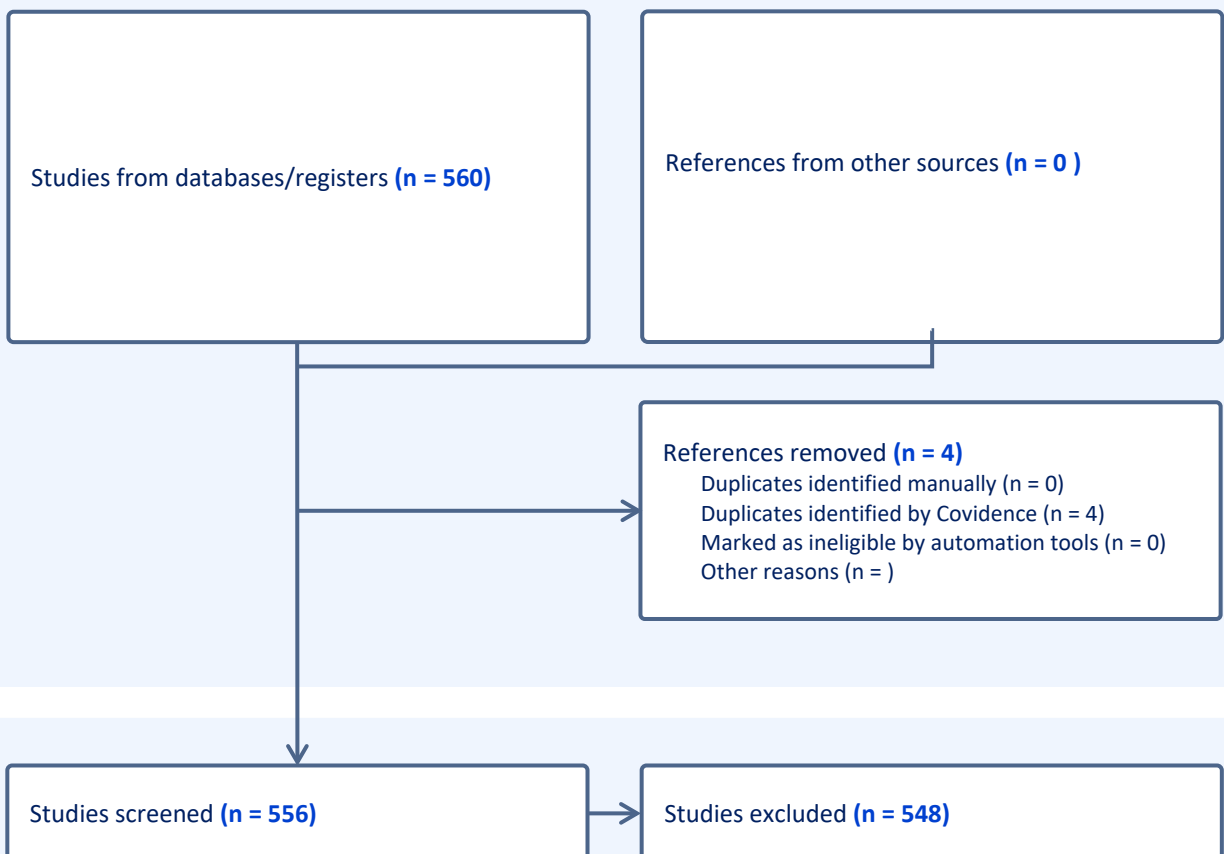

eFigure 26. Hypertension

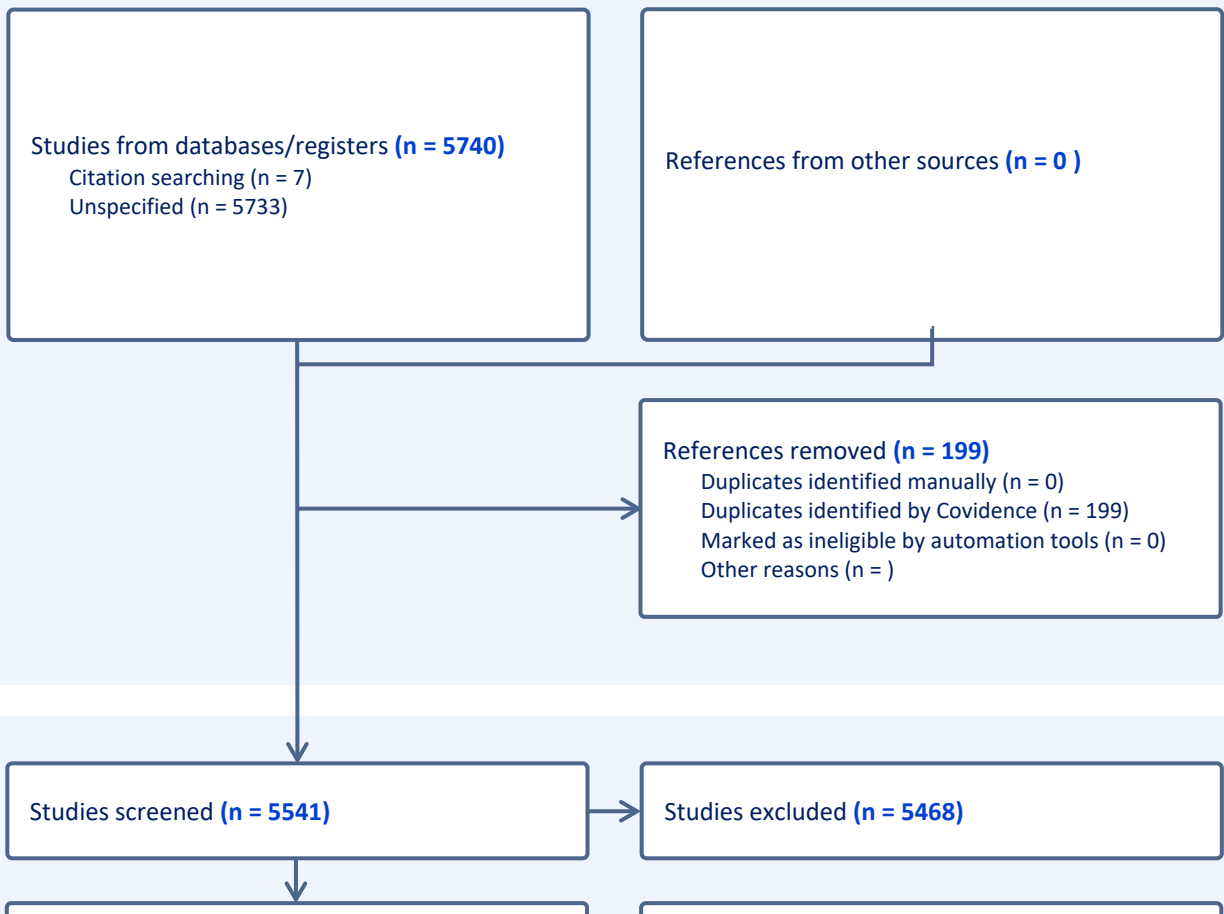



**Studies excluded (n = 63)**

- Abstract (n = 1)
- Wrong Aim (n = 28)
- Unavailable (n = 1)
- Systematic Review (n = 6)
- Wrong Study Design (n = 3)
- Non-English Language (n = 4)
- Wrong Surrogate End Point (n = 1)
- Less than 3 Included Studies (n = 1)
- No Discussion of Association (n = 4)
- Wrong or No Clinical Outcome (n = 4)
- Overlapping with Included Paper (n = 3)
- Observational or Cohort Studies Only (n = 7)

**eFigure 27. Hypertriglyceridemia**

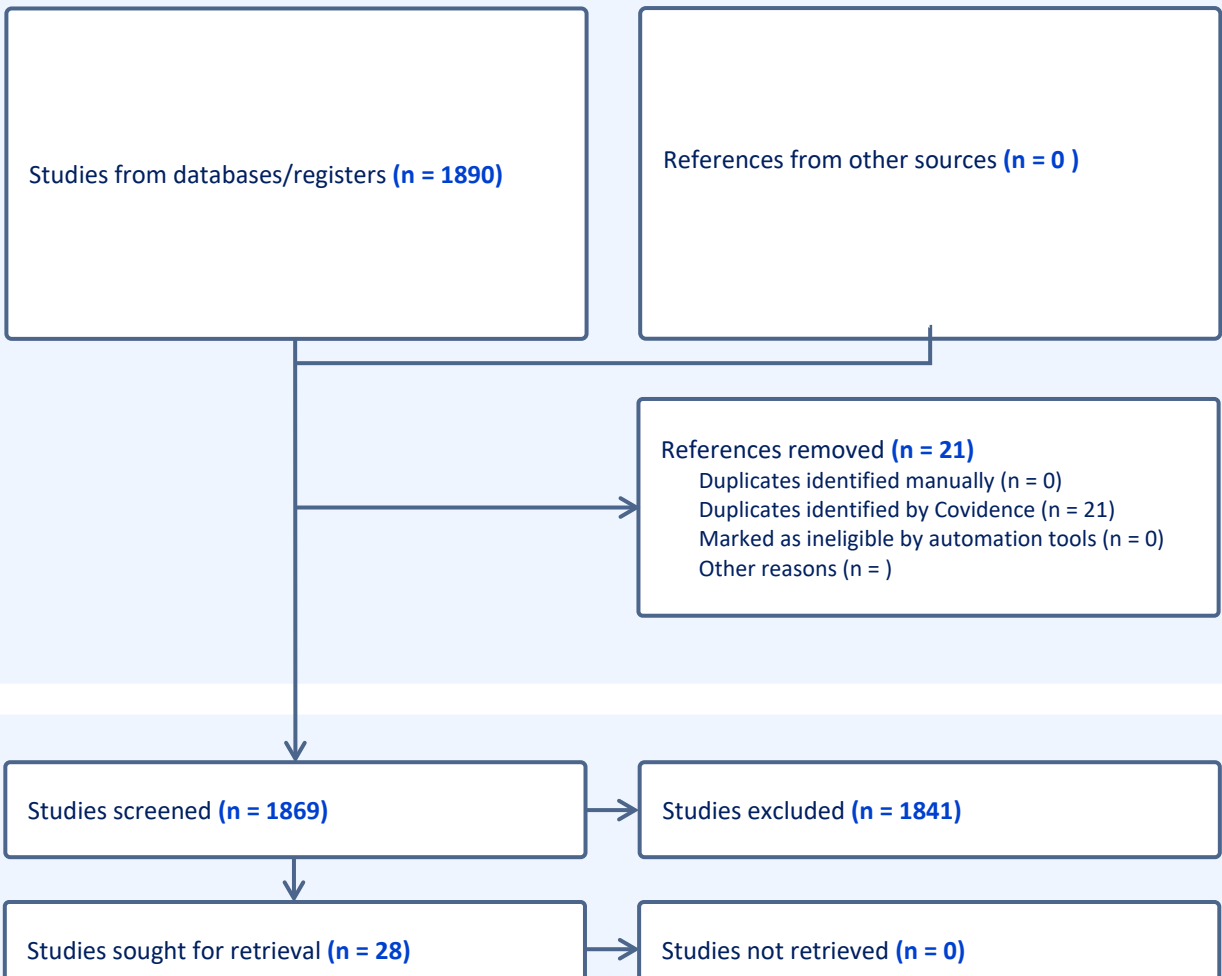

eFigure 28. Osteoporosis

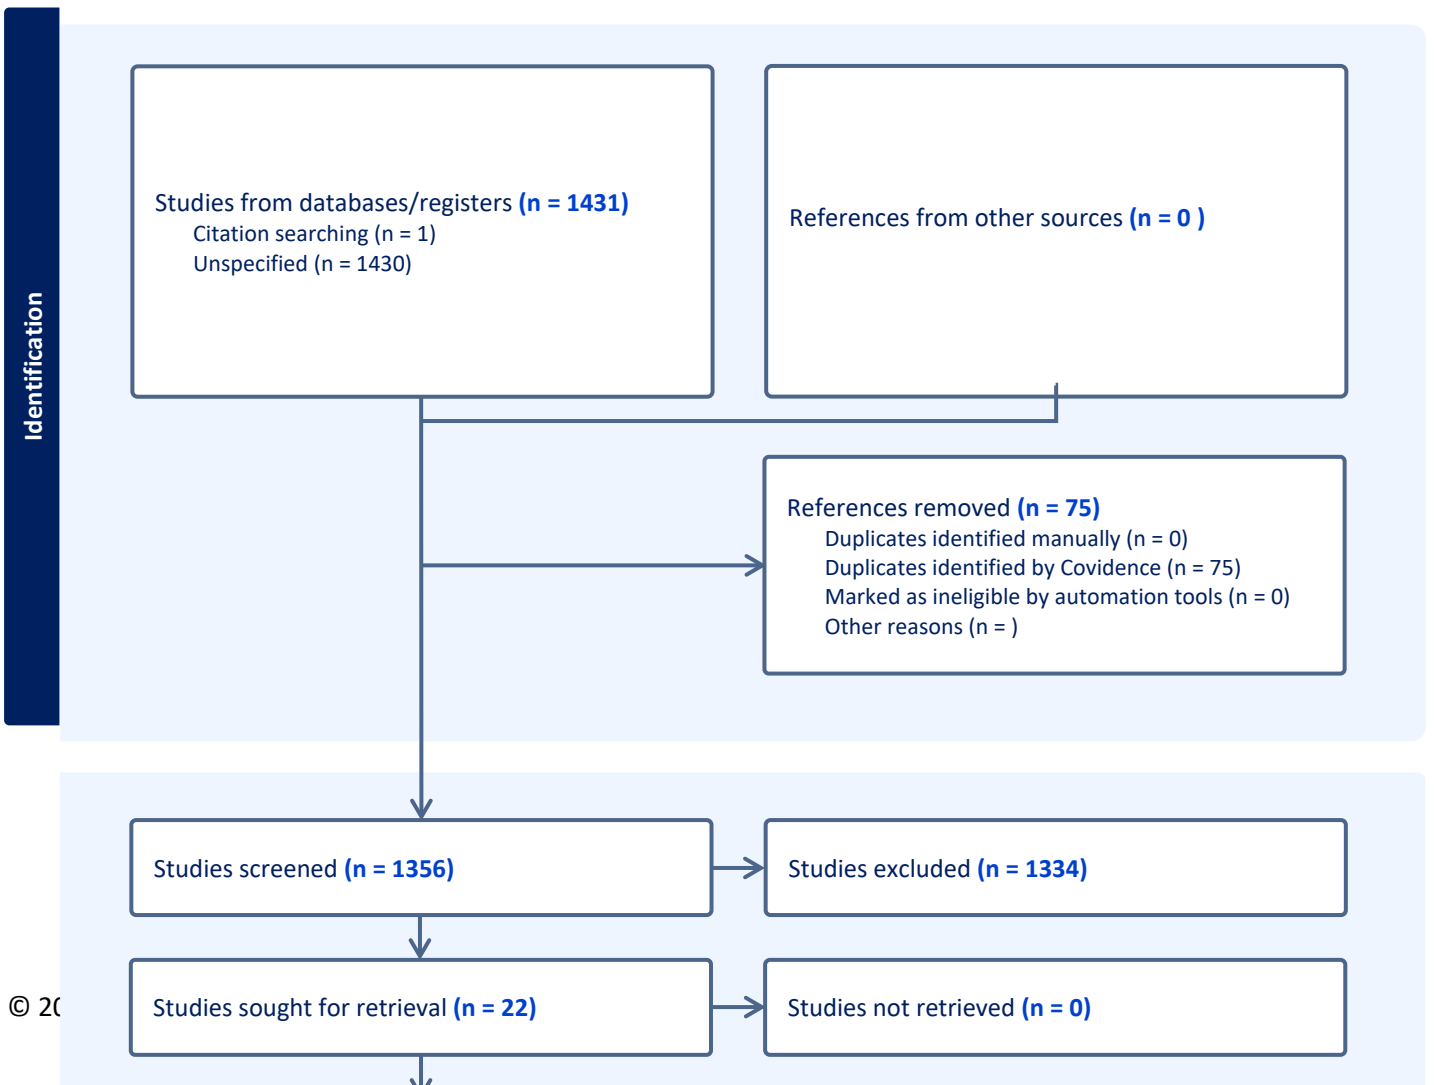

eFigure 29. Pulmonary fibrosis

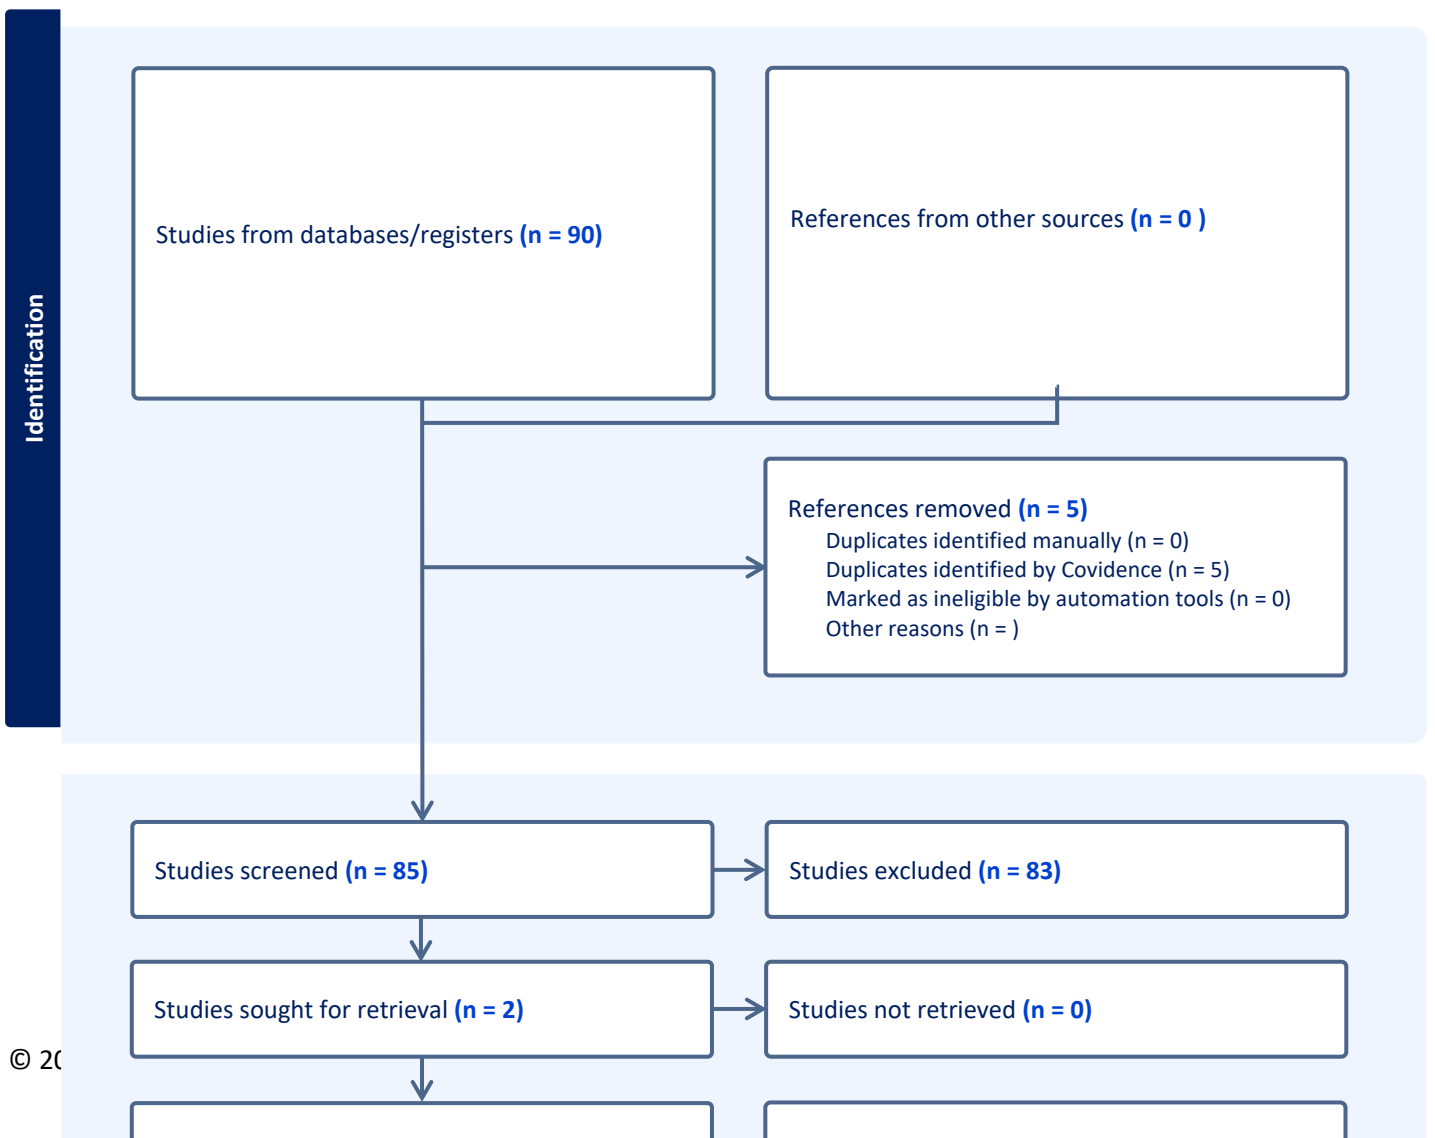

eFigure 30. Secondary hyperparathyroidism

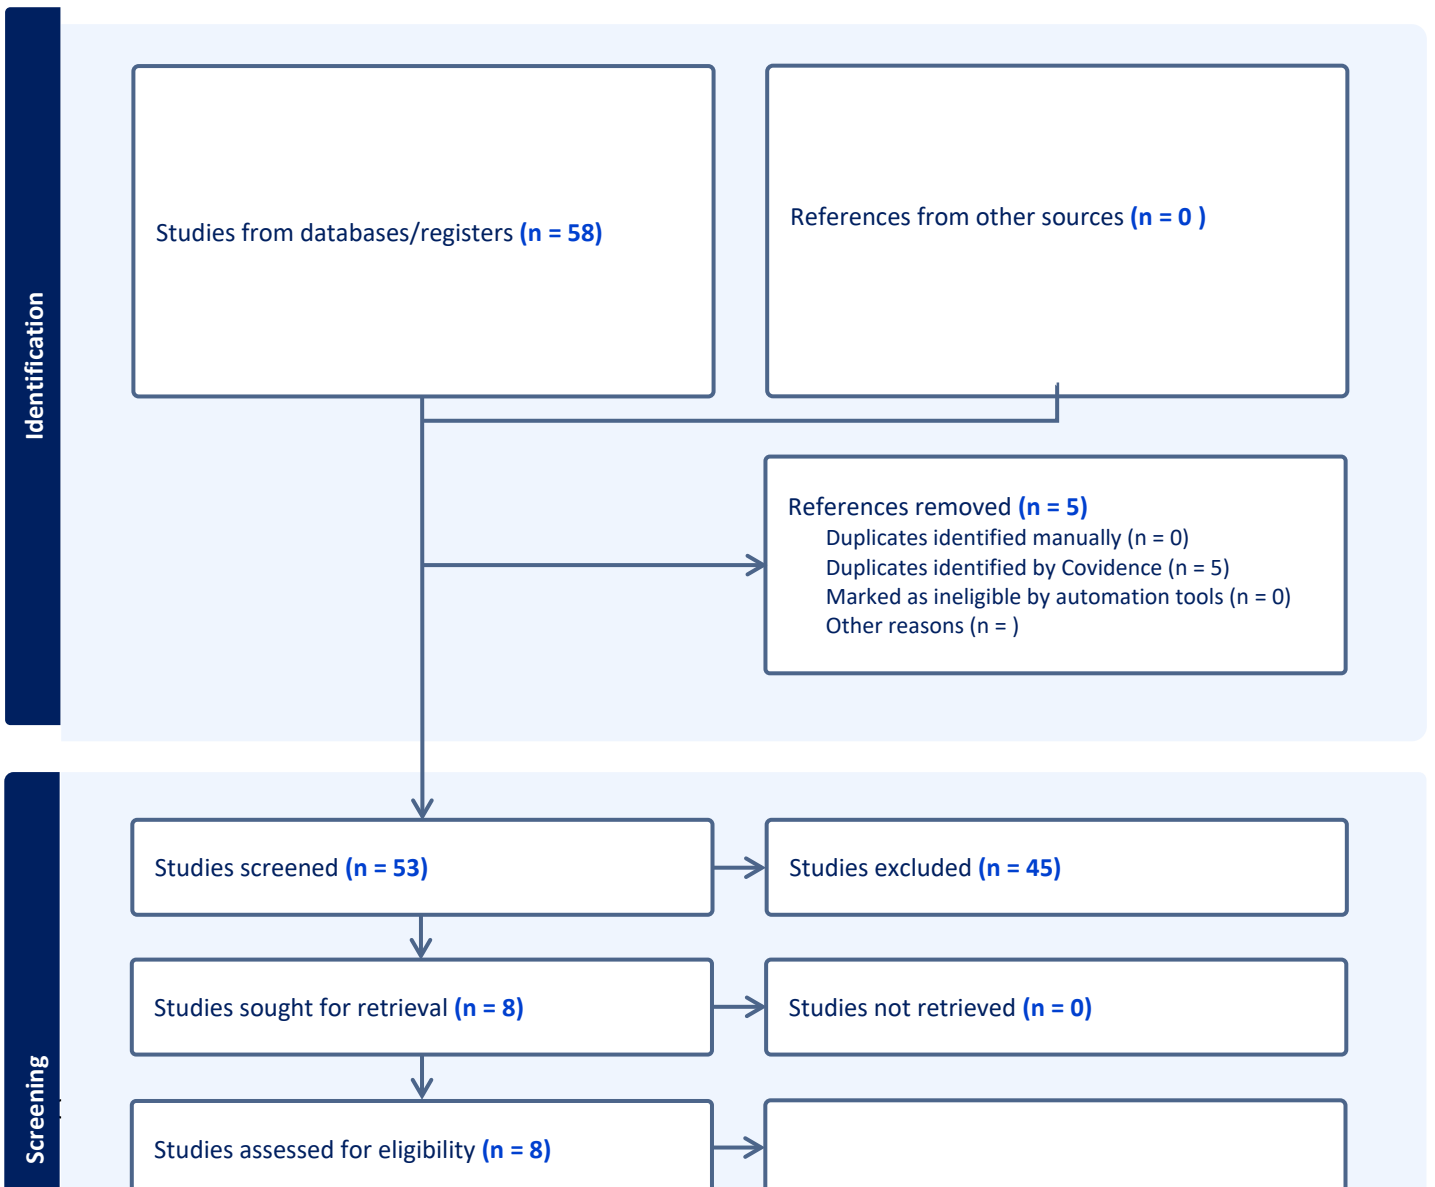

**eFigure 31. Type 2 diabetes mellitus**

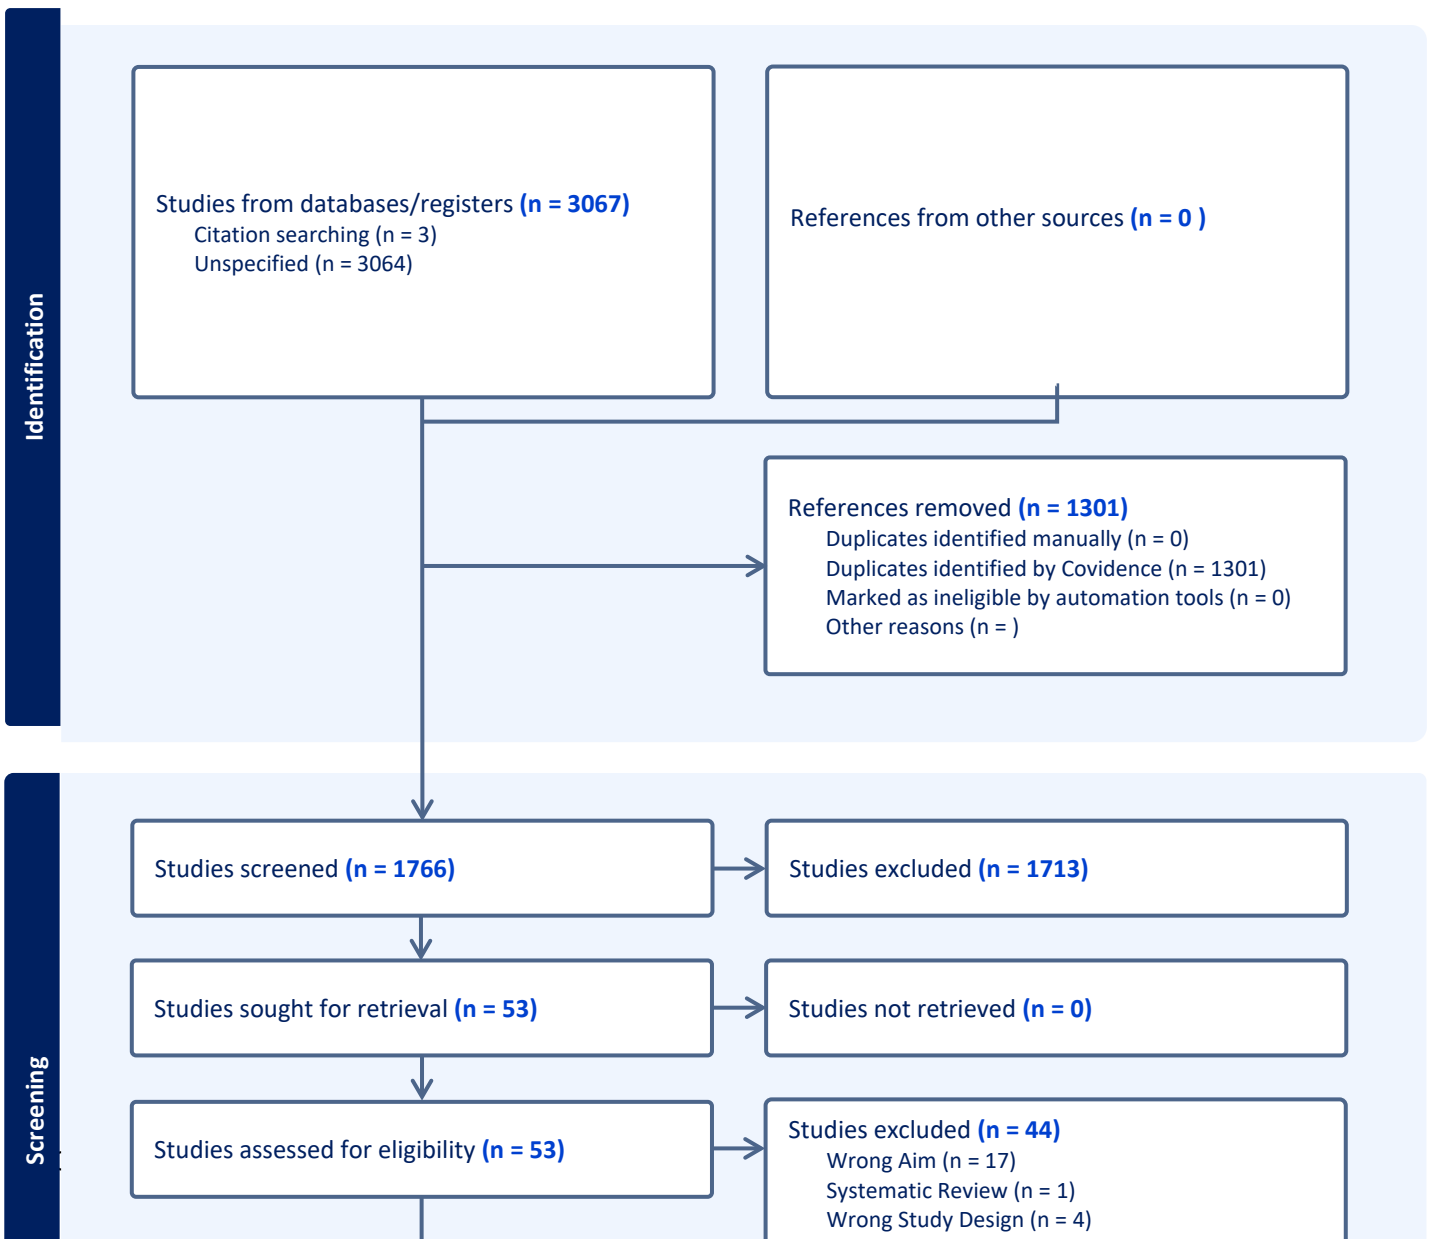

## References

1. Gyawali B, Hey SP, Kesselheim AS. Evaluating the evidence behind the surrogate measures included in the FDA's table of surrogate endpoints as supporting approval of cancer drugs. *EClinicalMedicine*. Apr 2020;21:100332. doi:10.1016/j.eclinm.2020.100332
2. Walia A, Haslam A, Prasad V. FDA validation of surrogate endpoints in oncology: 2005-2022. *J Cancer Policy*. Dec 2022;34:100364. doi:10.1016/j.jcpo.2022.100364
3. Kim C, Prasad V. Cancer Drugs Approved on the Basis of a Surrogate End Point and Subsequent Overall Survival: An Analysis of 5 Years of US Food and Drug Administration Approvals. *JAMA Intern Med*. Dec 2015;175(12):1992-4. doi:10.1001/jamainternmed.2015.5868
4. Prasad V, Kim C, Burotto M, Vandross A. The Strength of Association Between Surrogate End Points and Survival in Oncology: A Systematic Review of Trial-Level Meta-analyses. *JAMA Intern Med*. Aug 2015;175(8):1389-98. doi:10.1001/jamainternmed.2015.2829
5. Amur S, LaVange L, Zineh I, Buckman-Garner S, Woodcock J. Biomarker Qualification: Toward a Multiple Stakeholder Framework for Biomarker Development, Regulatory Acceptance, and Utilization. *Clin Pharmacol Ther*. Jul 2015;98(1):34-46. doi:10.1002/cpt.136
6. Weir CJ, Taylor RS. Informed decision-making: Statistical methodology for surrogacy evaluation and its role in licensing and reimbursement assessments. *Pharm Stat*. Jul 2022;21(4):740-756. doi:10.1002/pst.2219
7. Van der Elst W, Molenberghs G, Alonso A. Exploring the relationship between the causal-inference and meta-analytic paradigms for the evaluation of surrogate endpoints. *Stat Med*. Apr 15 2016;35(8):1281-98. doi:10.1002/sim.6807
8. Burzykowski T, Buyse M. Surrogate threshold effect: an alternative measure for meta-analytic surrogate endpoint validation. *Pharm Stat*. 2006;5(3):173-86. doi:10.1002/pst.207
9. Shi X, Zhuo H, Du Yuxuan, Nyhan K, Ioannidis JPA, Wallach JD. Environmental risk factors for non-hodgkin's lymphoma: umbrella review and comparison of meta-analyses of summary and individual participant data. *BMJ Medicine* 2022;1(1):e000184.
10. Ackley SF, Zimmerman SC, Brenowitz WD, et al. Effect of reductions in amyloid levels on cognitive change in randomized trials: instrumental variable meta-analysis. *BMJ*. Feb 25 2021;372:n156. doi:10.1136/bmj.n156
11. Pang M, Zhu L, Gabelle A, et al. Effect of reduction in brain amyloid levels on change in cognitive and functional decline in randomized clinical trials: An instrumental variable meta-analysis. *Alzheimers Dement*. Apr 2023;19(4):1292-1299. doi:10.1002/alz.12768
12. Avgerinos KI, Ferrucci L, Kapogiannis D. Effects of monoclonal antibodies against amyloid- $\beta$  on clinical and biomarker outcomes and adverse event risks: A systematic review and meta-analysis of phase III RCTs in Alzheimer's disease. *Ageing Res Rev*. Jul 2021;68:101339. doi:10.1016/j.arr.2021.101339
13. Inker LA, Mondal H, Greene T, et al. Early Change in Urine Protein as a Surrogate End Point in Studies of IgA Nephropathy: An Individual-Patient Meta-analysis. *Am J Kidney Dis*. Sep 2016;68(3):392-401. doi:10.1053/j.ajkd.2016.02.042

14. Inker LA, Heerspink HJL, Tighiouart H, et al. GFR Slope as a Surrogate End Point for Kidney Disease Progression in Clinical Trials: A Meta-Analysis of Treatment Effects of Randomized Controlled Trials. *J Am Soc Nephrol*. Sep 2019;30(9):1735-1745. doi:10.1681/ASN.2019010007
15. Lambers Heerspink HJ, Tighiouart H, Sang Y, et al. GFR decline and subsequent risk of established kidney outcomes: a meta-analysis of 37 randomized controlled trials. *Am J Kidney Dis*. Dec 2014;64(6):860-6. doi:10.1053/j.ajkd.2014.08.018
16. Zider AD, Wang X, Buhr RG, Sirichana W, Barjaktarevic IZ, Cooper CB. Reduced COPD Exacerbation Risk Correlates With Improved FEV<sub>1</sub>. *Chest*. Sep 2017;152(3):494-501. doi:10.1016/j.chest.2017.04.174
17. Donohue JF, Jones PW, Bartels C, et al. Correlations between FEV<sub>1</sub> and patient-reported outcomes: A pooled analysis of 23 clinical trials in patients with chronic obstructive pulmonary disease. *Pulm Pharmacol Ther*. Apr 2018;49:11-19. doi:10.1016/j.pupt.2017.12.005
18. de la Loge C, Tugaut B, Fofana F, et al. Relationship Between FEV<sub>1</sub>. *Chronic Obstr Pulm Dis*. Mar 15 2016;3(2):519-538. doi:10.15326/jcopdf.3.2.2015.0152
19. Martin AL, Marvel J, Fahrback K, Cadarette SM, Wilcox TK, Donohue JF. The association of lung function and St. George's respiratory questionnaire with exacerbations in COPD: a systematic literature review and regression analysis. *Respir Res*. Apr 16 2016;17:40. doi:10.1186/s12931-016-0356-1
20. Jones PW, Donohue JF, Nedelman J, Pascoe S, Pinault G, Lassen C. Correlating changes in lung function with patient outcomes in chronic obstructive pulmonary disease: a pooled analysis. *Respir Res*. Dec 29 2011;12(1):161. doi:10.1186/1465-9921-12-161
21. Westwood M, Bourbeau J, Jones PW, Cerulli A, Capkun-Niggli G, Worthy G. Relationship between FEV<sub>1</sub> change and patient-reported outcomes in randomised trials of inhaled bronchodilators for stable COPD: a systematic review. *Respir Res*. Apr 08 2011;12(1):40. doi:10.1186/1465-9921-12-40
22. Topless R, Noorbaloochi S, Merriman TR, Singh JA. Change in serum urate level with urate-lowering therapy initiation associates in the immediate term with patient-reported outcomes in people with gout. *Semin Arthritis Rheum*. Oct 2022;56:152057. doi:10.1016/j.semarthrit.2022.152057
23. Stamp L, Morillon MB, Taylor WJ, et al. Serum urate as surrogate endpoint for flares in people with gout: A systematic review and meta-regression analysis. *Semin Arthritis Rheum*. Oct 2018;48(2):293-301. doi:10.1016/j.semarthrit.2018.02.009
24. Mills EJ, Kelly S, Bradley M, Mollon P, Cooper C, Nachega J. Antiretroviral effects on HIV-1 RNA, CD4 cell count and progression to AIDS or death: a meta-regression analysis. *HIV Med*. Nov 2008;9(10):849-57. doi:10.1111/j.1468-1293.2008.00643.x
25. Staszewski S, DeMasi R, Hill AM, Dawson D. HIV-1 RNA, CD4 cell count and the risk of progression to AIDS and death during treatment with HIV-1 reverse transcriptase inhibitors. *AIDS*. Oct 22 1998;12(15):1991-7. doi:10.1097/00002030-199815000-00010
26. Baigent C, Blackwell L, Emberson J, et al. Efficacy and safety of more intensive lowering of LDL cholesterol: a meta-analysis of data from 170,000 participants in 26 randomised trials. *Lancet*. Nov 13 2010;376(9753):1670-81. doi:10.1016/S0140-6736(10)61350-5
27. Johnson KR, Freemantle N, Anthony DM, Lassere MN. LDL-cholesterol differences predicted survival benefit in statin trials by the surrogate threshold effect (STE). *J Clin Epidemiol*. Mar 2009;62(3):328-36. doi:10.1016/j.jclinepi.2008.06.004
28. Boekholdt SM, Arsenault BJ, Mora S, et al. Association of LDL cholesterol, non-HDL cholesterol, and apolipoprotein B levels with risk of cardiovascular events among patients treated with statins: a meta-analysis. *JAMA*. Mar 28 2012;307(12):1302-9. doi:10.1001/jama.2012.366
29. Briel M, Ferreira-Gonzalez I, You JJ, et al. Association between change in high density lipoprotein cholesterol and cardiovascular disease morbidity and mortality: systematic review and meta-regression analysis. *BMJ*. Feb 16 2009;338:b92. doi:10.1136/bmj.b92
30. Delahoy PJ, Magliano DJ, Webb K, Grobler M, Liew D. The relationship between reduction in low-density lipoprotein cholesterol by statins and reduction in risk of cardiovascular outcomes: an updated meta-analysis. *Clin Ther*. Feb 2009;31(2):236-44. doi:10.1016/j.clinthera.2009.02.017
31. Hourcade-Potelleret F, Laporte S, Lehnert V, et al. Clinical benefit from pharmacological elevation of high-density lipoprotein cholesterol: meta-regression analysis. *Heart*. Jun 2015;101(11):847-53. doi:10.1136/heartjnl-2014-306691
32. Labreuche J, Deplanque D, Touboul PJ, Bruckert E, Amarenco P. Association between change in plasma triglyceride levels and risk of stroke and carotid atherosclerosis: systematic review and meta-regression analysis. *Atherosclerosis*. Sep 2010;212(1):9-15. doi:10.1016/j.atherosclerosis.2010.02.011
33. Marston NA, Giugliano RP, Im K, et al. Association Between Triglyceride Lowering and Reduction of Cardiovascular Risk Across Multiple Lipid-Lowering Therapeutic Classes: A Systematic Review and Meta-Regression Analysis of Randomized Controlled Trials. *Circulation*. Oct 15 2019;140(16):1308-1317. doi:10.1161/CIRCULATIONAHA.119.041998
34. Razzolini R, Tarantini G, Ossena G, et al. Non-cardiovascular mortality, low-density lipoprotein cholesterol and statins: a meta-regression analysis. *Cardiology*. 2008;109(2):110-6. doi:10.1159/000105551

35. Stauffer ME, Weisenfluh L, Morrison A. Association between triglycerides and cardiovascular events in primary populations: a meta-regression analysis and synthesis of evidence. *Vasc Health Risk Manag.* 2013;9:671-80. doi:10.2147/VHRM.S52713
36. Vallejo-Vaz AJ, Ray KK, Ginsberg HN, et al. Associations between lower levels of low-density lipoprotein cholesterol and cardiovascular events in very high-risk patients: Pooled analysis of nine ODYSSEY trials of alirocumab versus control. *Atherosclerosis.* Sep 2019;288:85-93. doi:10.1016/j.atherosclerosis.2019.07.008
37. Palmer SC, Teixeira-Pinto A, Saglimbene V, et al. Association of Drug Effects on Serum Parathyroid Hormone, Phosphorus, and Calcium Levels With Mortality in CKD: A Meta-analysis. *Am J Kidney Dis.* Dec 2015;66(6):962-71. doi:10.1053/j.ajkd.2015.03.036
38. Collaboration BPLTT. Pharmacological blood pressure lowering for primary and secondary prevention of cardiovascular disease across different levels of blood pressure: an individual participant-level data meta-analysis. *Lancet.* May 01 2021;397(10285):1625-1636. doi:10.1016/S0140-6736(21)00590-0
39. Collaboration BPLTT. Blood pressure-lowering treatment based on cardiovascular risk: a meta-analysis of individual patient data. *Lancet.* Aug 16 2014;384(9943):591-598. doi:10.1016/S0140-6736(14)61212-5
40. Ettehad D, Emdin CA, Kiran A, et al. Blood pressure lowering for prevention of cardiovascular disease and death: a systematic review and meta-analysis. *Lancet.* Mar 05 2016;387(10022):957-967. doi:10.1016/S0140-6736(15)01225-8
41. Katsanos AH, Filippatou A, Manios E, et al. Blood Pressure Reduction and Secondary Stroke Prevention: A Systematic Review and Metaregression Analysis of Randomized Clinical Trials. *Hypertension.* Jan 2017;69(1):171-179. doi:10.1161/HYPERTENSIONAHA.116.08485
42. Lassere MN, Johnson KR, Schiff M, Rees D. Is blood pressure reduction a valid surrogate endpoint for stroke prevention? An analysis incorporating a systematic review of randomised controlled trials, a by-trial weighted errors-in-variables regression, the surrogate threshold effect (STE) and the Biomarker-Surrogacy (BioSurrogate) Evaluation Schema (BSES). *BMC Med Res Methodol.* Mar 12 2012;12:27. doi:10.1186/1471-2288-12-27
43. Nazarzadeh M, Bidel Z, Canoy D, et al. Blood pressure-lowering treatment for prevention of major cardiovascular diseases in people with and without type 2 diabetes: an individual participant-level data meta-analysis. *Lancet Diabetes Endocrinol.* Sep 2022;10(9):645-654. doi:10.1016/S2213-8587(22)00172-3
44. Reboldi G, Gentile G, Angeli F, Ambrosio G, Mancia G, Verdecchia P. Effects of intensive blood pressure reduction on myocardial infarction and stroke in diabetes: a meta-analysis in 73,913 patients. *J Hypertens.* Jul 2011;29(7):1253-69. doi:10.1097/HJH.0b013e3283469976
45. Salam A, Atkins E, Sundström J, et al. Effects of blood pressure lowering on cardiovascular events, in the context of regression to the mean: a systematic review of randomized trials. *J Hypertens.* Jan 2019;37(1):16-23. doi:10.1097/HJH.0000000000001994
46. Thomopoulos C, Parati G, Zanchetti A. Effects of blood pressure lowering on outcome incidence in hypertension. 1. Overview, meta-analyses, and meta-regression analyses of randomized trials. *J Hypertens.* Dec 2014;32(12):2285-95. doi:10.1097/HJH.0000000000000378
47. Verdecchia P, Gentile G, Angeli F, Mazzotta G, Mancia G, Reboldi G. Influence of blood pressure reduction on composite cardiovascular endpoints in clinical trials. *J Hypertens.* Jul 2010;28(7):1356-65. doi:10.1097/HJH.0b013e328338e2bb
48. Black DM, Bauer DC, Vittinghoff E, et al. Treatment-related changes in bone mineral density as a surrogate biomarker for fracture risk reduction: meta-regression analyses of individual patient data from multiple randomised controlled trials. *Lancet Diabetes Endocrinol.* Aug 2020;8(8):672-682. doi:10.1016/S2213-8587(20)30159-5
49. Bouxsein ML, Eastell R, Lui LY, et al. Change in Bone Density and Reduction in Fracture Risk: A Meta-Regression of Published Trials. *J Bone Miner Res.* Apr 2019;34(4):632-642. doi:10.1002/jbmr.3641
50. Cummings SR, Karpf DB, Harris F, et al. Improvement in spine bone density and reduction in risk of vertebral fractures during treatment with antiresorptive drugs. *Am J Med.* Mar 2002;112(4):281-9. doi:10.1016/s0002-9343(01)01124-x
51. Hochberg MC, Greenspan S, Wasnich RD, Miller P, Thompson DE, Ross PD. Changes in bone density and turnover explain the reductions in incidence of nonvertebral fractures that occur during treatment with antiresorptive agents. *J Clin Endocrinol Metab.* Apr 2002;87(4):1586-92. doi:10.1210/jcem.87.4.8415
52. Wasnich RD, Miller PD. Antifracture efficacy of antiresorptive agents are related to changes in bone density. *J Clin Endocrinol Metab.* Jan 2000;85(1):231-6. doi:10.1210/jcem.85.1.6267
53. Watts NB, Geusens P, Barton IP, Felsenberg D. Relationship between changes in BMD and nonvertebral fracture incidence associated with risedronate: reduction in risk of nonvertebral fracture is not related to change in BMD. *J Bone Miner Res.* Dec 2005;20(12):2097-104. doi:10.1359/JBMR.050814
54. Khan FA, Stewart I, Moss S, et al. Three-Month FVC Change: A Trial Endpoint for Idiopathic Pulmonary Fibrosis Based on Individual Participant Data Meta-analysis. *Am J Respir Crit Care Med.* Apr 15 2022;205(8):936-948. doi:10.1164/rccm.202109-2091OC



55. Ambrosi P, Daumas A, Villani P, Giorgi R. Glycosylated Hemoglobin as a Surrogate for the Prevention of Cardiovascular Events in Cardiovascular Outcome Trials Comparing New Antidiabetic Drugs to Placebo. *Cardiology*. 2020;145(6):370-374. doi:10.1159/000506004
56. Baechle C, Scherler W, Lang A, Filla T, Kuss O. Is HbA1c a valid surrogate for mortality in type 2 diabetes? Evidence from a meta-analysis of randomized trials. *Acta Diabetol*. Oct 2022;59(10):1257-1263. doi:10.1007/s00592-022-01887-y
57. Bejan-Angoulvant T, Cornu C, Archambault P, et al. Is HbA1c a valid surrogate for macrovascular and microvascular complications in type 2 diabetes? *Diabetes Metab*. Jun 2015;41(3):195-201. doi:10.1016/j.diabet.2015.04.001
58. de Carvalho LSF, Nogueira ACC, Bonilha I, et al. Glucose-Lowering and the Risk of Cardiovascular Events With Antidiabetic Therapies: A Systematic Review and Additive-Effects Network Meta-Analysis. *Front Cardiovasc Med*. 2022;9:876795. doi:10.3389/fcvm.2022.876795
59. Fralick M, Colacci M, Odutayo A, Siemieniuk R, Glynn RJ. Lowering of hemoglobin A1C and risk of cardiovascular outcomes and all-cause mortality, a meta-regression analysis. *J Diabetes Complications*. Nov 2020;34(11):107704. doi:10.1016/j.jdiacomp.2020.107704
60. Huang CJ, Wang WT, Sung SH, et al. Revisiting 'intensive' blood glucose control: A causal directed acyclic graph-guided systematic review of randomized controlled trials. *Diabetes Obes Metab*. Dec 2022;24(12):2341-2352. doi:10.1111/dom.14819
61. Maiorino MI, Longo M, Scappaticcio L, et al. Improvement of glycemic control and reduction of major cardiovascular events in 18 cardiovascular outcome trials: an updated meta-regression. *Cardiovasc Diabetol*. Oct 18 2021;20(1):210. doi:10.1186/s12933-021-01401-8
62. Rivera PA, Rodríguez-Zúñiga MJM, Caballero-Alvarado J, Fiestas F. Glycated hemoglobin as a surrogate for evaluating the effectiveness of drugs in diabetes mellitus trials: a systematic review and trial-level meta-analysis. *Int J Technol Assess Health Care*. Dec 22 2021;38(1):e12. doi:10.1017/S0266462321001689
63. Thomopoulos C, Bazoukis G, Ilias I, Tsioufis C, Makris T. Effects of glucose-lowering on outcome incidence in diabetes mellitus and the modulating role of blood pressure and other clinical variables: overview, meta-analysis of randomized trials. *J Hypertens*. Oct 2019;37(10):1939-1949. doi:10.1097/HJH.0000000000002152
64. Institut für Qualität und Wirtschaftlichkeit im Gesundheitswesen. IQWiG Reports - Commission No, A10-05. Validity of surrogate endpoints in oncology. Version 1.1. Status. 21.11.2011. [https://www.iqwig.de/download/a10-05\\_executive\\_summary\\_v1-1\\_surrogate\\_endpoints\\_in\\_oncology.pdf](https://www.iqwig.de/download/a10-05_executive_summary_v1-1_surrogate_endpoints_in_oncology.pdf).
