# Supplementary material
Source: PubMed Central journal article supplement (PMC11036312)
Supplement: jama-e244175-s002.pdf [file jama-e244175-s002.pdf]

## **Data Sharing Statement**

### **Data**

**Data available:** Yes

**Data types:** Data (not involving human participants)

**How to access data:** All data are available in the supplementary materials

**When available:** With publication

### **Supporting Documents**

**Document types:** None

### **Additional Information**

**Who can access the data:** Anyone

**Types of analyses:** For any purpose

**Mechanisms of data availability:** Without investigator support

**Any additional restrictions:** None
